# Supplementary material
Source: Research Square preprint supplement (doi:10.21203/rs.3.rs-9252913/v1)
Supplement: Supplementary file 1 [file b52623ec214788048a675b2d.xlsx]

## Sheet: 0-22.5
Step(i)	Time/Angle(θ)	Setting(a=0)	Setting(b=22.5)	EAlice	Ebob	Joint intensity
0	0	0	0.785398	1	0.707107	0.707107
1	0.000314159	0	0.785398	1	0.707329	0.707329
2	0.000628319	0	0.785398	1	0.707551	0.707551
3	0.000942478	0	0.785398	1	0.707773	0.707773
4	0.00125664	0	0.785398	0.999999	0.707995	0.707994
5	0.0015708	0	0.785398	0.999999	0.708217	0.708216
6	0.00188496	0	0.785398	0.999998	0.708438	0.708437
7	0.00219911	0	0.785398	0.999998	0.70866	0.708658
8	0.00251327	0	0.785398	0.999997	0.708882	0.708879
9	0.00282743	0	0.785398	0.999996	0.709103	0.7091
10	0.00314159	0	0.785398	0.999995	0.709325	0.709321
11	0.00345575	0	0.785398	0.999994	0.709546	0.709542
12	0.00376991	0	0.785398	0.999993	0.709767	0.709762
13	0.00408407	0	0.785398	0.999992	0.709989	0.709983
14	0.00439823	0	0.785398	0.99999	0.71021	0.710203
15	0.00471239	0	0.785398	0.999989	0.710431	0.710423
16	0.00502655	0	0.785398	0.999987	0.710652	0.710643
17	0.00534071	0	0.785398	0.999986	0.710873	0.710863				0.392699	0.92388
18	0.00565487	0	0.785398	0.999984	0.711094	0.711083
19	0.00596903	0	0.785398	0.999982	0.711315	0.711302
20	0.00628319	0	0.785398	0.99998	0.711536	0.711522
21	0.00659734	0	0.785398	0.999978	0.711756	0.711741
22	0.0069115	0	0.785398	0.999976	0.711977	0.71196
23	0.00722566	0	0.785398	0.999974	0.712198	0.712179
24	0.00753982	0	0.785398	0.999972	0.712418	0.712398
25	0.00785398	0	0.785398	0.999969	0.712639	0.712617
26	0.00816814	0	0.785398	0.999967	0.712859	0.712835
27	0.0084823	0	0.785398	0.999964	0.713079	0.713054
28	0.00879646	0	0.785398	0.999961	0.713299	0.713272
29	0.00911062	0	0.785398	0.999958	0.71352	0.71349
30	0.00942478	0	0.785398	0.999956	0.71374	0.713708
31	0.00973894	0	0.785398	0.999953	0.71396	0.713926
32	0.0100531	0	0.785398	0.999949	0.71418	0.714143
33	0.0103673	0	0.785398	0.999946	0.714399	0.714361
34	0.0106814	0	0.785398	0.999943	0.714619	0.714578
35	0.0109956	0	0.785398	0.99994	0.714839	0.714796
36	0.0113097	0	0.785398	0.999936	0.715059	0.715013
37	0.0116239	0	0.785398	0.999932	0.715278	0.71523
38	0.0119381	0	0.785398	0.999929	0.715498	0.715447
39	0.0122522	0	0.785398	0.999925	0.715717	0.715663
40	0.0125664	0	0.785398	0.999921	0.715936	0.71588
41	0.0128805	0	0.785398	0.999917	0.716156	0.716096
42	0.0131947	0	0.785398	0.999913	0.716375	0.716313
43	0.0135088	0	0.785398	0.999909	0.716594	0.716529
44	0.013823	0	0.785398	0.999904	0.716813	0.716745
45	0.0141372	0	0.785398	0.9999	0.717032	0.716961
46	0.0144513	0	0.785398	0.999896	0.717251	0.717176
47	0.0147655	0	0.785398	0.999891	0.71747	0.717392
48	0.0150796	0	0.785398	0.999886	0.717689	0.717607
49	0.0153938	0	0.785398	0.999882	0.717908	0.717823
50	0.015708	0	0.785398	0.999877	0.718126	0.718038
51	0.0160221	0	0.785398	0.999872	0.718345	0.718253
52	0.0163363	0	0.785398	0.999867	0.718563	0.718468
53	0.0166504	0	0.785398	0.999861	0.718782	0.718682
54	0.0169646	0	0.785398	0.999856	0.719	0.718897
55	0.0172788	0	0.785398	0.999851	0.719219	0.719111
56	0.0175929	0	0.785398	0.999845	0.719437	0.719325
57	0.0179071	0	0.785398	0.99984	0.719655	0.71954
58	0.0182212	0	0.785398	0.999834	0.719873	0.719754
59	0.0185354	0	0.785398	0.999828	0.720091	0.719967
60	0.0188496	0	0.785398	0.999822	0.720309	0.720181
61	0.0191637	0	0.785398	0.999816	0.720527	0.720395
62	0.0194779	0	0.785398	0.99981	0.720745	0.720608
63	0.019792	0	0.785398	0.999804	0.720962	0.720821
64	0.0201062	0	0.785398	0.999798	0.72118	0.721034
65	0.0204204	0	0.785398	0.999792	0.721398	0.721247
66	0.0207345	0	0.785398	0.999785	0.721615	0.72146
67	0.0210487	0	0.785398	0.999778	0.721833	0.721673
68	0.0213628	0	0.785398	0.999772	0.72205	0.721885
69	0.021677	0	0.785398	0.999765	0.722267	0.722098
70	0.0219911	0	0.785398	0.999758	0.722485	0.72231
71	0.0223053	0	0.785398	0.999751	0.722702	0.722522
72	0.0226195	0	0.785398	0.999744	0.722919	0.722734
73	0.0229336	0	0.785398	0.999737	0.723136	0.722946
74	0.0232478	0	0.785398	0.99973	0.723353	0.723157
75	0.0235619	0	0.785398	0.999722	0.72357	0.723369
76	0.0238761	0	0.785398	0.999715	0.723787	0.72358
77	0.0241903	0	0.785398	0.999707	0.724003	0.723792
78	0.0245044	0	0.785398	0.9997	0.72422	0.724003
79	0.0248186	0	0.785398	0.999692	0.724437	0.724214
80	0.0251327	0	0.785398	0.999684	0.724653	0.724424
81	0.0254469	0	0.785398	0.999676	0.72487	0.724635
82	0.0257611	0	0.785398	0.999668	0.725086	0.724845
83	0.0260752	0	0.785398	0.99966	0.725302	0.725056
84	0.0263894	0	0.785398	0.999652	0.725519	0.725266
85	0.0267035	0	0.785398	0.999643	0.725735	0.725476
86	0.0270177	0	0.785398	0.999635	0.725951	0.725686
87	0.0273319	0	0.785398	0.999627	0.726167	0.725896
88	0.027646	0	0.785398	0.999618	0.726383	0.726105
89	0.0279602	0	0.785398	0.999609	0.726599	0.726315
90	0.0282743	0	0.785398	0.9996	0.726814	0.726524
91	0.0285885	0	0.785398	0.999591	0.72703	0.726733
92	0.0289027	0	0.785398	0.999582	0.727246	0.726942
93	0.0292168	0	0.785398	0.999573	0.727461	0.727151
94	0.029531	0	0.785398	0.999564	0.727677	0.72736
95	0.0298451	0	0.785398	0.999555	0.727892	0.727568
96	0.0301593	0	0.785398	0.999545	0.728108	0.727777
97	0.0304734	0	0.785398	0.999536	0.728323	0.727985
98	0.0307876	0	0.785398	0.999526	0.728538	0.728193
99	0.0311018	0	0.785398	0.999516	0.728754	0.728401
100	0.0314159	0	0.785398	0.999507	0.728969	0.728609
101	0.0317301	0	0.785398	0.999497	0.729184	0.728817
102	0.0320442	0	0.785398	0.999487	0.729399	0.729024
103	0.0323584	0	0.785398	0.999477	0.729613	0.729232
104	0.0326726	0	0.785398	0.999466	0.729828	0.729439
105	0.0329867	0	0.785398	0.999456	0.730043	0.729646
106	0.0333009	0	0.785398	0.999446	0.730258	0.729853
107	0.033615	0	0.785398	0.999435	0.730472	0.73006
108	0.0339292	0	0.785398	0.999424	0.730687	0.730266
109	0.0342434	0	0.785398	0.999414	0.730901	0.730473
110	0.0345575	0	0.785398	0.999403	0.731116	0.730679
111	0.0348717	0	0.785398	0.999392	0.73133	0.730885
112	0.0351858	0	0.785398	0.999381	0.731544	0.731091
113	0.0355	0	0.785398	0.99937	0.731758	0.731297
114	0.0358142	0	0.785398	0.999359	0.731972	0.731503
115	0.0361283	0	0.785398	0.999347	0.732186	0.731709
116	0.0364425	0	0.785398	0.999336	0.7324	0.731914
117	0.0367566	0	0.785398	0.999325	0.732614	0.732119
118	0.0370708	0	0.785398	0.999313	0.732828	0.732324
119	0.037385	0	0.785398	0.999301	0.733042	0.732529
120	0.0376991	0	0.785398	0.999289	0.733255	0.732734
121	0.0380133	0	0.785398	0.999278	0.733469	0.732939
122	0.0383274	0	0.785398	0.999266	0.733682	0.733144
123	0.0386416	0	0.785398	0.999254	0.733896	0.733348
124	0.0389557	0	0.785398	0.999241	0.734109	0.733552
125	0.0392699	0	0.785398	0.999229	0.734323	0.733756
126	0.0395841	0	0.785398	0.999217	0.734536	0.73396
127	0.0398982	0	0.785398	0.999204	0.734749	0.734164
128	0.0402124	0	0.785398	0.999192	0.734962	0.734368
129	0.0405265	0	0.785398	0.999179	0.735175	0.734571
130	0.0408407	0	0.785398	0.999166	0.735388	0.734775
131	0.0411549	0	0.785398	0.999153	0.735601	0.734978
132	0.041469	0	0.785398	0.99914	0.735813	0.735181
133	0.0417832	0	0.785398	0.999127	0.736026	0.735384
134	0.0420973	0	0.785398	0.999114	0.736239	0.735587
135	0.0424115	0	0.785398	0.999101	0.736451	0.735789
136	0.0427257	0	0.785398	0.999087	0.736664	0.735992
137	0.0430398	0	0.785398	0.999074	0.736876	0.736194
138	0.043354	0	0.785398	0.99906	0.737089	0.736396
139	0.0436681	0	0.785398	0.999047	0.737301	0.736598
140	0.0439823	0	0.785398	0.999033	0.737513	0.7368
141	0.0442965	0	0.785398	0.999019	0.737725	0.737002
142	0.0446106	0	0.785398	0.999005	0.737937	0.737203
143	0.0449248	0	0.785398	0.998991	0.738149	0.737405
144	0.0452389	0	0.785398	0.998977	0.738361	0.737606
145	0.0455531	0	0.785398	0.998963	0.738573	0.737807
146	0.0458673	0	0.785398	0.998948	0.738785	0.738008
147	0.0461814	0	0.785398	0.998934	0.738996	0.738209
148	0.0464956	0	0.785398	0.998919	0.739208	0.738409
149	0.0468097	0	0.785398	0.998905	0.73942	0.73861
150	0.0471239	0	0.785398	0.99889	0.739631	0.73881
151	0.047438	0	0.785398	0.998875	0.739842	0.73901
152	0.0477522	0	0.785398	0.99886	0.740054	0.73921
153	0.0480664	0	0.785398	0.998845	0.740265	0.73941
154	0.0483805	0	0.785398	0.99883	0.740476	0.73961
155	0.0486947	0	0.785398	0.998815	0.740687	0.739809
156	0.0490088	0	0.785398	0.998799	0.740898	0.740009
157	0.049323	0	0.785398	0.998784	0.741109	0.740208
158	0.0496372	0	0.785398	0.998768	0.74132	0.740407
159	0.0499513	0	0.785398	0.998753	0.741531	0.740606
160	0.0502655	0	0.785398	0.998737	0.741742	0.740805
161	0.0505796	0	0.785398	0.998721	0.741952	0.741004
162	0.0508938	0	0.785398	0.998705	0.742163	0.741202
163	0.051208	0	0.785398	0.998689	0.742374	0.7414
164	0.0515221	0	0.785398	0.998673	0.742584	0.741599
165	0.0518363	0	0.785398	0.998657	0.742794	0.741797
166	0.0521504	0	0.785398	0.99864	0.743005	0.741995
167	0.0524646	0	0.785398	0.998624	0.743215	0.742192
168	0.0527788	0	0.785398	0.998608	0.743425	0.74239
169	0.0530929	0	0.785398	0.998591	0.743635	0.742587
170	0.0534071	0	0.785398	0.998574	0.743845	0.742785
171	0.0537212	0	0.785398	0.998557	0.744055	0.742982
172	0.0540354	0	0.785398	0.99854	0.744265	0.743179
173	0.0543496	0	0.785398	0.998523	0.744475	0.743375
174	0.0546637	0	0.785398	0.998506	0.744684	0.743572
175	0.0549779	0	0.785398	0.998489	0.744894	0.743769
176	0.055292	0	0.785398	0.998472	0.745104	0.743965
177	0.0556062	0	0.785398	0.998454	0.745313	0.744161
178	0.0559203	0	0.785398	0.998437	0.745523	0.744357
179	0.0562345	0	0.785398	0.998419	0.745732	0.744553
180	0.0565487	0	0.785398	0.998402	0.745941	0.744749
181	0.0568628	0	0.785398	0.998384	0.74615	0.744944
182	0.057177	0	0.785398	0.998366	0.746359	0.74514
183	0.0574911	0	0.785398	0.998348	0.746569	0.745335
184	0.0578053	0	0.785398	0.99833	0.746777	0.74553
185	0.0581195	0	0.785398	0.998312	0.746986	0.745725
186	0.0584336	0	0.785398	0.998293	0.747195	0.74592
187	0.0587478	0	0.785398	0.998275	0.747404	0.746115
188	0.0590619	0	0.785398	0.998256	0.747613	0.746309
189	0.0593761	0	0.785398	0.998238	0.747821	0.746503
190	0.0596903	0	0.785398	0.998219	0.74803	0.746698
191	0.0600044	0	0.785398	0.9982	0.748238	0.746892
192	0.0603186	0	0.785398	0.998181	0.748447	0.747086
193	0.0606327	0	0.785398	0.998162	0.748655	0.747279
194	0.0609469	0	0.785398	0.998143	0.748863	0.747473
195	0.0612611	0	0.785398	0.998124	0.749071	0.747666
196	0.0615752	0	0.785398	0.998105	0.749279	0.747859
197	0.0618894	0	0.785398	0.998085	0.749487	0.748053
198	0.0622035	0	0.785398	0.998066	0.749695	0.748245
199	0.0625177	0	0.785398	0.998046	0.749903	0.748438
200	0.0628319	0	0.785398	0.998027	0.750111	0.748631
201	0.063146	0	0.785398	0.998007	0.750319	0.748823
202	0.0634602	0	0.785398	0.997987	0.750526	0.749016
203	0.0637743	0	0.785398	0.997967	0.750734	0.749208
204	0.0640885	0	0.785398	0.997947	0.750942	0.7494
205	0.0644026	0	0.785398	0.997927	0.751149	0.749592
206	0.0647168	0	0.785398	0.997907	0.751356	0.749783
207	0.065031	0	0.785398	0.997886	0.751564	0.749975
208	0.0653451	0	0.785398	0.997866	0.751771	0.750166
209	0.0656593	0	0.785398	0.997845	0.751978	0.750358
210	0.0659734	0	0.785398	0.997825	0.752185	0.750549
211	0.0662876	0	0.785398	0.997804	0.752392	0.750739
212	0.0666018	0	0.785398	0.997783	0.752599	0.75093
213	0.0669159	0	0.785398	0.997762	0.752806	0.751121
214	0.0672301	0	0.785398	0.997741	0.753012	0.751311
215	0.0675442	0	0.785398	0.99772	0.753219	0.751502
216	0.0678584	0	0.785398	0.997699	0.753426	0.751692
217	0.0681726	0	0.785398	0.997677	0.753632	0.751882
218	0.0684867	0	0.785398	0.997656	0.753839	0.752071
219	0.0688009	0	0.785398	0.997634	0.754045	0.752261
220	0.069115	0	0.785398	0.997613	0.754251	0.752451
221	0.0694292	0	0.785398	0.997591	0.754458	0.75264
222	0.0697434	0	0.785398	0.997569	0.754664	0.752829
223	0.0700575	0	0.785398	0.997547	0.75487	0.753018
224	0.0703717	0	0.785398	0.997525	0.755076	0.753207
225	0.0706858	0	0.785398	0.997503	0.755282	0.753396
226	0.071	0	0.785398	0.997481	0.755488	0.753584
227	0.0713142	0	0.785398	0.997458	0.755693	0.753773
228	0.0716283	0	0.785398	0.997436	0.755899	0.753961
229	0.0719425	0	0.785398	0.997413	0.756105	0.754149
230	0.0722566	0	0.785398	0.997391	0.75631	0.754337
231	0.0725708	0	0.785398	0.997368	0.756516	0.754525
232	0.0728849	0	0.785398	0.997345	0.756721	0.754712
233	0.0731991	0	0.785398	0.997322	0.756927	0.7549
234	0.0735133	0	0.785398	0.997299	0.757132	0.755087
235	0.0738274	0	0.785398	0.997276	0.757337	0.755274
236	0.0741416	0	0.785398	0.997253	0.757542	0.755461
237	0.0744557	0	0.785398	0.997229	0.757747	0.755648
238	0.0747699	0	0.785398	0.997206	0.757952	0.755835
239	0.0750841	0	0.785398	0.997183	0.758157	0.756021
240	0.0753982	0	0.785398	0.997159	0.758362	0.756207
241	0.0757124	0	0.785398	0.997135	0.758567	0.756394
242	0.0760265	0	0.785398	0.997111	0.758771	0.75658
243	0.0763407	0	0.785398	0.997087	0.758976	0.756765
244	0.0766549	0	0.785398	0.997063	0.75918	0.756951
245	0.076969	0	0.785398	0.997039	0.759385	0.757137
246	0.0772832	0	0.785398	0.997015	0.759589	0.757322
247	0.0775973	0	0.785398	0.996991	0.759794	0.757507
248	0.0779115	0	0.785398	0.996966	0.759998	0.757692
249	0.0782257	0	0.785398	0.996942	0.760202	0.757877
250	0.0785398	0	0.785398	0.996917	0.760406	0.758062
251	0.078854	0	0.785398	0.996893	0.76061	0.758246
252	0.0791681	0	0.785398	0.996868	0.760814	0.758431
253	0.0794823	0	0.785398	0.996843	0.761018	0.758615
254	0.0797965	0	0.785398	0.996818	0.761221	0.758799
255	0.0801106	0	0.785398	0.996793	0.761425	0.758983
256	0.0804248	0	0.785398	0.996768	0.761629	0.759167
257	0.0807389	0	0.785398	0.996742	0.761832	0.759351
258	0.0810531	0	0.785398	0.996717	0.762036	0.759534
259	0.0813672	0	0.785398	0.996692	0.762239	0.759717
260	0.0816814	0	0.785398	0.996666	0.762443	0.7599
261	0.0819956	0	0.785398	0.99664	0.762646	0.760083
262	0.0823097	0	0.785398	0.996614	0.762849	0.760266
263	0.0826239	0	0.785398	0.996589	0.763052	0.760449
264	0.082938	0	0.785398	0.996563	0.763255	0.760631
265	0.0832522	0	0.785398	0.996537	0.763458	0.760814
266	0.0835664	0	0.785398	0.99651	0.763661	0.760996
267	0.0838805	0	0.785398	0.996484	0.763864	0.761178
268	0.0841947	0	0.785398	0.996458	0.764066	0.76136
269	0.0845088	0	0.785398	0.996431	0.764269	0.761541
270	0.084823	0	0.785398	0.996405	0.764472	0.761723
271	0.0851372	0	0.785398	0.996378	0.764674	0.761904
272	0.0854513	0	0.785398	0.996351	0.764876	0.762086
273	0.0857655	0	0.785398	0.996324	0.765079	0.762267
274	0.0860796	0	0.785398	0.996297	0.765281	0.762448
275	0.0863938	0	0.785398	0.99627	0.765483	0.762628
276	0.086708	0	0.785398	0.996243	0.765685	0.762809
277	0.0870221	0	0.785398	0.996216	0.765887	0.762989
278	0.0873363	0	0.785398	0.996189	0.766089	0.763169
279	0.0876504	0	0.785398	0.996161	0.766291	0.76335
280	0.0879646	0	0.785398	0.996134	0.766493	0.763529
281	0.0882788	0	0.785398	0.996106	0.766695	0.763709
282	0.0885929	0	0.785398	0.996078	0.766896	0.763889
283	0.0889071	0	0.785398	0.99605	0.767098	0.764068
284	0.0892212	0	0.785398	0.996022	0.767299	0.764247
285	0.0895354	0	0.785398	0.995994	0.767501	0.764427
286	0.0898495	0	0.785398	0.995966	0.767702	0.764606
287	0.0901637	0	0.785398	0.995938	0.767904	0.764784
288	0.0904779	0	0.785398	0.99591	0.768105	0.764963
289	0.090792	0	0.785398	0.995881	0.768306	0.765141
290	0.0911062	0	0.785398	0.995853	0.768507	0.76532
291	0.0914203	0	0.785398	0.995824	0.768708	0.765498
292	0.0917345	0	0.785398	0.995795	0.768909	0.765676
293	0.0920487	0	0.785398	0.995767	0.76911	0.765854
294	0.0923628	0	0.785398	0.995738	0.76931	0.766031
295	0.092677	0	0.785398	0.995709	0.769511	0.766209
296	0.0929911	0	0.785398	0.995679	0.769712	0.766386
297	0.0933053	0	0.785398	0.99565	0.769912	0.766563
298	0.0936195	0	0.785398	0.995621	0.770113	0.76674
299	0.0939336	0	0.785398	0.995591	0.770313	0.766917
300	0.0942478	0	0.785398	0.995562	0.770513	0.767094
301	0.0945619	0	0.785398	0.995532	0.770713	0.76727
302	0.0948761	0	0.785398	0.995503	0.770914	0.767447
303	0.0951903	0	0.785398	0.995473	0.771114	0.767623
304	0.0955044	0	0.785398	0.995443	0.771314	0.767799
305	0.0958186	0	0.785398	0.995413	0.771514	0.767975
306	0.0961327	0	0.785398	0.995383	0.771713	0.76815
307	0.0964469	0	0.785398	0.995353	0.771913	0.768326
308	0.0967611	0	0.785398	0.995322	0.772113	0.768501
309	0.0970752	0	0.785398	0.995292	0.772312	0.768676
310	0.0973894	0	0.785398	0.995261	0.772512	0.768851
311	0.0977035	0	0.785398	0.995231	0.772711	0.769026
312	0.0980177	0	0.785398	0.9952	0.772911	0.769201
313	0.0983319	0	0.785398	0.995169	0.77311	0.769375
314	0.098646	0	0.785398	0.995138	0.773309	0.76955
315	0.0989602	0	0.785398	0.995107	0.773508	0.769724
316	0.0992743	0	0.785398	0.995076	0.773708	0.769898
317	0.0995885	0	0.785398	0.995045	0.773907	0.770072
318	0.0999026	0	0.785398	0.995014	0.774105	0.770246
319	0.100217	0	0.785398	0.994982	0.774304	0.770419
320	0.100531	0	0.785398	0.994951	0.774503	0.770593
321	0.100845	0	0.785398	0.994919	0.774702	0.770766
322	0.101159	0	0.785398	0.994888	0.7749	0.770939
323	0.101473	0	0.785398	0.994856	0.775099	0.771112
324	0.101788	0	0.785398	0.994824	0.775297	0.771285
325	0.102102	0	0.785398	0.994792	0.775496	0.771457
326	0.102416	0	0.785398	0.99476	0.775694	0.771629
327	0.10273	0	0.785398	0.994728	0.775892	0.771802
328	0.103044	0	0.785398	0.994696	0.77609	0.771974
329	0.103358	0	0.785398	0.994663	0.776289	0.772146
330	0.103673	0	0.785398	0.994631	0.776487	0.772317
331	0.103987	0	0.785398	0.994598	0.776684	0.772489
332	0.104301	0	0.785398	0.994566	0.776882	0.77266
333	0.104615	0	0.785398	0.994533	0.77708	0.772832
334	0.104929	0	0.785398	0.9945	0.777278	0.773003
335	0.105243	0	0.785398	0.994467	0.777475	0.773174
336	0.105558	0	0.785398	0.994434	0.777673	0.773344
337	0.105872	0	0.785398	0.994401	0.77787	0.773515
338	0.106186	0	0.785398	0.994368	0.778068	0.773685
339	0.1065	0	0.785398	0.994334	0.778265	0.773856
340	0.106814	0	0.785398	0.994301	0.778462	0.774026
341	0.107128	0	0.785398	0.994267	0.778659	0.774196
342	0.107442	0	0.785398	0.994234	0.778857	0.774365
343	0.107757	0	0.785398	0.9942	0.779054	0.774535
344	0.108071	0	0.785398	0.994166	0.77925	0.774704
345	0.108385	0	0.785398	0.994132	0.779447	0.774874
346	0.108699	0	0.785398	0.994098	0.779644	0.775043
347	0.109013	0	0.785398	0.994064	0.779841	0.775212
348	0.109327	0	0.785398	0.99403	0.780037	0.77538
349	0.109642	0	0.785398	0.993995	0.780234	0.775549
350	0.109956	0	0.785398	0.993961	0.78043	0.775717
351	0.11027	0	0.785398	0.993926	0.780627	0.775886
352	0.110584	0	0.785398	0.993892	0.780823	0.776054
353	0.110898	0	0.785398	0.993857	0.781019	0.776222
354	0.111212	0	0.785398	0.993822	0.781215	0.776389
355	0.111527	0	0.785398	0.993787	0.781412	0.776557
356	0.111841	0	0.785398	0.993752	0.781608	0.776724
357	0.112155	0	0.785398	0.993717	0.781803	0.776892
358	0.112469	0	0.785398	0.993682	0.781999	0.777059
359	0.112783	0	0.785398	0.993647	0.782195	0.777226
360	0.113097	0	0.785398	0.993611	0.782391	0.777392
361	0.113411	0	0.785398	0.993576	0.782586	0.777559
362	0.113726	0	0.785398	0.99354	0.782782	0.777725
363	0.11404	0	0.785398	0.993505	0.782977	0.777892
364	0.114354	0	0.785398	0.993469	0.783173	0.778058
365	0.114668	0	0.785398	0.993433	0.783368	0.778224
366	0.114982	0	0.785398	0.993397	0.783563	0.778389
367	0.115296	0	0.785398	0.993361	0.783758	0.778555
368	0.115611	0	0.785398	0.993325	0.783954	0.77872
369	0.115925	0	0.785398	0.993288	0.784149	0.778886
370	0.116239	0	0.785398	0.993252	0.784343	0.779051
371	0.116553	0	0.785398	0.993215	0.784538	0.779216
372	0.116867	0	0.785398	0.993179	0.784733	0.77938
373	0.117181	0	0.785398	0.993142	0.784928	0.779545
374	0.117496	0	0.785398	0.993105	0.785122	0.779709
375	0.11781	0	0.785398	0.993068	0.785317	0.779873
376	0.118124	0	0.785398	0.993031	0.785511	0.780038
377	0.118438	0	0.785398	0.992994	0.785706	0.780201
378	0.118752	0	0.785398	0.992957	0.7859	0.780365
379	0.119066	0	0.785398	0.99292	0.786094	0.780529
380	0.119381	0	0.785398	0.992883	0.786288	0.780692
381	0.119695	0	0.785398	0.992845	0.786482	0.780855
382	0.120009	0	0.785398	0.992808	0.786676	0.781018
383	0.120323	0	0.785398	0.99277	0.78687	0.781181
384	0.120637	0	0.785398	0.992732	0.787064	0.781344
385	0.120951	0	0.785398	0.992694	0.787258	0.781507
386	0.121265	0	0.785398	0.992656	0.787452	0.781669
387	0.12158	0	0.785398	0.992618	0.787645	0.781831
388	0.121894	0	0.785398	0.99258	0.787839	0.781993
389	0.122208	0	0.785398	0.992542	0.788032	0.782155
390	0.122522	0	0.785398	0.992504	0.788226	0.782317
391	0.122836	0	0.785398	0.992465	0.788419	0.782478
392	0.12315	0	0.785398	0.992427	0.788612	0.78264
393	0.123465	0	0.785398	0.992388	0.788805	0.782801
394	0.123779	0	0.785398	0.992349	0.788998	0.782962
395	0.124093	0	0.785398	0.99231	0.789191	0.783123
396	0.124407	0	0.785398	0.992271	0.789384	0.783283
397	0.124721	0	0.785398	0.992232	0.789577	0.783444
398	0.125035	0	0.785398	0.992193	0.78977	0.783604
399	0.12535	0	0.785398	0.992154	0.789962	0.783764
400	0.125664	0	0.785398	0.992115	0.790155	0.783924
401	0.125978	0	0.785398	0.992075	0.790348	0.784084
402	0.126292	0	0.785398	0.992036	0.79054	0.784244
403	0.126606	0	0.785398	0.991996	0.790732	0.784403
404	0.12692	0	0.785398	0.991956	0.790925	0.784563
405	0.127235	0	0.785398	0.991917	0.791117	0.784722
406	0.127549	0	0.785398	0.991877	0.791309	0.784881
407	0.127863	0	0.785398	0.991837	0.791501	0.78504
408	0.128177	0	0.785398	0.991797	0.791693	0.785198
409	0.128491	0	0.785398	0.991756	0.791885	0.785357
410	0.128805	0	0.785398	0.991716	0.792077	0.785515
411	0.129119	0	0.785398	0.991676	0.792268	0.785673
412	0.129434	0	0.785398	0.991635	0.79246	0.785831
413	0.129748	0	0.785398	0.991595	0.792652	0.785989
414	0.130062	0	0.785398	0.991554	0.792843	0.786147
415	0.130376	0	0.785398	0.991513	0.793034	0.786304
416	0.13069	0	0.785398	0.991472	0.793226	0.786461
417	0.131004	0	0.785398	0.991431	0.793417	0.786618
418	0.131319	0	0.785398	0.99139	0.793608	0.786775
419	0.131633	0	0.785398	0.991349	0.793799	0.786932
420	0.131947	0	0.785398	0.991308	0.79399	0.787089
421	0.132261	0	0.785398	0.991266	0.794181	0.787245
422	0.132575	0	0.785398	0.991225	0.794372	0.787401
423	0.132889	0	0.785398	0.991183	0.794563	0.787557
424	0.133204	0	0.785398	0.991142	0.794754	0.787713
425	0.133518	0	0.785398	0.9911	0.794944	0.787869
426	0.133832	0	0.785398	0.991058	0.795135	0.788025
427	0.134146	0	0.785398	0.991016	0.795325	0.78818
428	0.13446	0	0.785398	0.990974	0.795516	0.788335
429	0.134774	0	0.785398	0.990932	0.795706	0.78849
430	0.135088	0	0.785398	0.990889	0.795896	0.788645
431	0.135403	0	0.785398	0.990847	0.796087	0.7888
432	0.135717	0	0.785398	0.990805	0.796277	0.788955
433	0.136031	0	0.785398	0.990762	0.796467	0.789109
434	0.136345	0	0.785398	0.990719	0.796657	0.789263
435	0.136659	0	0.785398	0.990677	0.796846	0.789417
436	0.136973	0	0.785398	0.990634	0.797036	0.789571
437	0.137288	0	0.785398	0.990591	0.797226	0.789725
438	0.137602	0	0.785398	0.990548	0.797415	0.789878
439	0.137916	0	0.785398	0.990505	0.797605	0.790031
440	0.13823	0	0.785398	0.990461	0.797794	0.790185
441	0.138544	0	0.785398	0.990418	0.797984	0.790338
442	0.138858	0	0.785398	0.990375	0.798173	0.79049
443	0.139173	0	0.785398	0.990331	0.798362	0.790643
444	0.139487	0	0.785398	0.990287	0.798551	0.790796
445	0.139801	0	0.785398	0.990244	0.798741	0.790948
446	0.140115	0	0.785398	0.9902	0.79893	0.7911
447	0.140429	0	0.785398	0.990156	0.799118	0.791252
448	0.140743	0	0.785398	0.990112	0.799307	0.791404
449	0.141058	0	0.785398	0.990068	0.799496	0.791555
450	0.141372	0	0.785398	0.990024	0.799685	0.791707
451	0.141686	0	0.785398	0.989979	0.799873	0.791858
452	0.142	0	0.785398	0.989935	0.800062	0.792009
453	0.142314	0	0.785398	0.98989	0.80025	0.79216
454	0.142628	0	0.785398	0.989846	0.800439	0.792311
455	0.142942	0	0.785398	0.989801	0.800627	0.792461
456	0.143257	0	0.785398	0.989756	0.800815	0.792612
457	0.143571	0	0.785398	0.989711	0.801003	0.792762
458	0.143885	0	0.785398	0.989666	0.801191	0.792912
459	0.144199	0	0.785398	0.989621	0.801379	0.793062
460	0.144513	0	0.785398	0.989576	0.801567	0.793212
461	0.144827	0	0.785398	0.989531	0.801755	0.793361
462	0.145142	0	0.785398	0.989485	0.801943	0.79351
463	0.145456	0	0.785398	0.98944	0.80213	0.79366
464	0.14577	0	0.785398	0.989394	0.802318	0.793809
465	0.146084	0	0.785398	0.989349	0.802505	0.793957
466	0.146398	0	0.785398	0.989303	0.802693	0.794106
467	0.146712	0	0.785398	0.989257	0.80288	0.794255
468	0.147027	0	0.785398	0.989211	0.803067	0.794403
469	0.147341	0	0.785398	0.989165	0.803254	0.794551
470	0.147655	0	0.785398	0.989119	0.803441	0.794699
471	0.147969	0	0.785398	0.989073	0.803628	0.794847
472	0.148283	0	0.785398	0.989026	0.803815	0.794994
473	0.148597	0	0.785398	0.98898	0.804002	0.795142
474	0.148911	0	0.785398	0.988933	0.804189	0.795289
475	0.149226	0	0.785398	0.988886	0.804376	0.795436
476	0.14954	0	0.785398	0.98884	0.804562	0.795583
477	0.149854	0	0.785398	0.988793	0.804749	0.79573
478	0.150168	0	0.785398	0.988746	0.804935	0.795876
479	0.150482	0	0.785398	0.988699	0.805122	0.796023
480	0.150796	0	0.785398	0.988652	0.805308	0.796169
481	0.151111	0	0.785398	0.988605	0.805494	0.796315
482	0.151425	0	0.785398	0.988557	0.80568	0.796461
483	0.151739	0	0.785398	0.98851	0.805866	0.796607
484	0.152053	0	0.785398	0.988462	0.806052	0.796752
485	0.152367	0	0.785398	0.988415	0.806238	0.796898
486	0.152681	0	0.785398	0.988367	0.806424	0.797043
487	0.152996	0	0.785398	0.988319	0.80661	0.797188
488	0.15331	0	0.785398	0.988271	0.806795	0.797333
489	0.153624	0	0.785398	0.988223	0.806981	0.797477
490	0.153938	0	0.785398	0.988175	0.807166	0.797622
491	0.154252	0	0.785398	0.988127	0.807352	0.797766
492	0.154566	0	0.785398	0.988078	0.807537	0.79791
493	0.154881	0	0.785398	0.98803	0.807722	0.798054
494	0.155195	0	0.785398	0.987981	0.807908	0.798198
495	0.155509	0	0.785398	0.987933	0.808093	0.798341
496	0.155823	0	0.785398	0.987884	0.808278	0.798485
497	0.156137	0	0.785398	0.987835	0.808463	0.798628
498	0.156451	0	0.785398	0.987786	0.808648	0.798771
499	0.156765	0	0.785398	0.987737	0.808832	0.798914
500	0.15708	0	0.785398	0.987688	0.809017	0.799057
501	0.157394	0	0.785398	0.987639	0.809202	0.799199
502	0.157708	0	0.785398	0.98759	0.809386	0.799342
503	0.158022	0	0.785398	0.98754	0.809571	0.799484
504	0.158336	0	0.785398	0.987491	0.809755	0.799626
505	0.15865	0	0.785398	0.987441	0.809939	0.799768
506	0.158965	0	0.785398	0.987392	0.810124	0.799909
507	0.159279	0	0.785398	0.987342	0.810308	0.800051
508	0.159593	0	0.785398	0.987292	0.810492	0.800192
509	0.159907	0	0.785398	0.987242	0.810676	0.800333
510	0.160221	0	0.785398	0.987192	0.81086	0.800474
511	0.160535	0	0.785398	0.987142	0.811043	0.800615
512	0.16085	0	0.785398	0.987092	0.811227	0.800755
513	0.161164	0	0.785398	0.987041	0.811411	0.800896
514	0.161478	0	0.785398	0.986991	0.811594	0.801036
515	0.161792	0	0.785398	0.98694	0.811778	0.801176
516	0.162106	0	0.785398	0.98689	0.811961	0.801316
517	0.16242	0	0.785398	0.986839	0.812145	0.801456
518	0.162734	0	0.785398	0.986788	0.812328	0.801595
519	0.163049	0	0.785398	0.986737	0.812511	0.801735
520	0.163363	0	0.785398	0.986686	0.812694	0.801874
521	0.163677	0	0.785398	0.986635	0.812877	0.802013
522	0.163991	0	0.785398	0.986584	0.81306	0.802152
523	0.164305	0	0.785398	0.986532	0.813243	0.80229
524	0.164619	0	0.785398	0.986481	0.813426	0.802429
525	0.164934	0	0.785398	0.986429	0.813608	0.802567
526	0.165248	0	0.785398	0.986378	0.813791	0.802705
527	0.165562	0	0.785398	0.986326	0.813974	0.802843
528	0.165876	0	0.785398	0.986274	0.814156	0.802981
529	0.16619	0	0.785398	0.986222	0.814338	0.803119
530	0.166504	0	0.785398	0.98617	0.814521	0.803256
531	0.166819	0	0.785398	0.986118	0.814703	0.803393
532	0.167133	0	0.785398	0.986066	0.814885	0.80353
533	0.167447	0	0.785398	0.986013	0.815067	0.803667
534	0.167761	0	0.785398	0.985961	0.815249	0.803804
535	0.168075	0	0.785398	0.985909	0.815431	0.80394
536	0.168389	0	0.785398	0.985856	0.815613	0.804077
537	0.168704	0	0.785398	0.985803	0.815795	0.804213
538	0.169018	0	0.785398	0.98575	0.815976	0.804349
539	0.169332	0	0.785398	0.985698	0.816158	0.804485
540	0.169646	0	0.785398	0.985645	0.816339	0.80462
541	0.16996	0	0.785398	0.985592	0.816521	0.804756
542	0.170274	0	0.785398	0.985538	0.816702	0.804891
543	0.170588	0	0.785398	0.985485	0.816883	0.805026
544	0.170903	0	0.785398	0.985432	0.817064	0.805161
545	0.171217	0	0.785398	0.985378	0.817245	0.805296
546	0.171531	0	0.785398	0.985325	0.817426	0.80543
547	0.171845	0	0.785398	0.985271	0.817607	0.805565
548	0.172159	0	0.785398	0.985217	0.817788	0.805699
549	0.172473	0	0.785398	0.985163	0.817969	0.805833
550	0.172788	0	0.785398	0.985109	0.81815	0.805967
551	0.173102	0	0.785398	0.985055	0.81833	0.806101
552	0.173416	0	0.785398	0.985001	0.818511	0.806234
553	0.17373	0	0.785398	0.984947	0.818691	0.806367
554	0.174044	0	0.785398	0.984892	0.818872	0.806501
555	0.174358	0	0.785398	0.984838	0.819052	0.806633
556	0.174673	0	0.785398	0.984783	0.819232	0.806766
557	0.174987	0	0.785398	0.984729	0.819412	0.806899
558	0.175301	0	0.785398	0.984674	0.819592	0.807031
559	0.175615	0	0.785398	0.984619	0.819772	0.807164
560	0.175929	0	0.785398	0.984564	0.819952	0.807296
561	0.176243	0	0.785398	0.984509	0.820132	0.807427
562	0.176558	0	0.785398	0.984454	0.820312	0.807559
563	0.176872	0	0.785398	0.984399	0.820491	0.807691
564	0.177186	0	0.785398	0.984344	0.820671	0.807822
565	0.1775	0	0.785398	0.984288	0.82085	0.807953
566	0.177814	0	0.785398	0.984233	0.82103	0.808084
567	0.178128	0	0.785398	0.984177	0.821209	0.808215
568	0.178442	0	0.785398	0.984121	0.821388	0.808346
569	0.178757	0	0.785398	0.984066	0.821567	0.808476
570	0.179071	0	0.785398	0.98401	0.821746	0.808606
571	0.179385	0	0.785398	0.983954	0.821925	0.808736
572	0.179699	0	0.785398	0.983898	0.822104	0.808866
573	0.180013	0	0.785398	0.983841	0.822283	0.808996
574	0.180327	0	0.785398	0.983785	0.822462	0.809126
575	0.180642	0	0.785398	0.983729	0.822641	0.809255
576	0.180956	0	0.785398	0.983672	0.822819	0.809384
577	0.18127	0	0.785398	0.983616	0.822998	0.809513
578	0.181584	0	0.785398	0.983559	0.823176	0.809642
579	0.181898	0	0.785398	0.983502	0.823354	0.809771
580	0.182212	0	0.785398	0.983445	0.823533	0.809899
581	0.182527	0	0.785398	0.983388	0.823711	0.810027
582	0.182841	0	0.785398	0.983331	0.823889	0.810156
583	0.183155	0	0.785398	0.983274	0.824067	0.810284
584	0.183469	0	0.785398	0.983217	0.824245	0.810411
585	0.183783	0	0.785398	0.983159	0.824423	0.810539
586	0.184097	0	0.785398	0.983102	0.8246	0.810666
587	0.184411	0	0.785398	0.983044	0.824778	0.810793
588	0.184726	0	0.785398	0.982987	0.824956	0.81092
589	0.18504	0	0.785398	0.982929	0.825133	0.811047
590	0.185354	0	0.785398	0.982871	0.825311	0.811174
591	0.185668	0	0.785398	0.982813	0.825488	0.8113
592	0.185982	0	0.785398	0.982755	0.825665	0.811427
593	0.186296	0	0.785398	0.982697	0.825842	0.811553
594	0.186611	0	0.785398	0.982639	0.82602	0.811679
595	0.186925	0	0.785398	0.98258	0.826197	0.811805
596	0.187239	0	0.785398	0.982522	0.826374	0.81193
597	0.187553	0	0.785398	0.982463	0.82655	0.812056
598	0.187867	0	0.785398	0.982405	0.826727	0.812181
599	0.188181	0	0.785398	0.982346	0.826904	0.812306
600	0.188496	0	0.785398	0.982287	0.827081	0.812431
601	0.18881	0	0.785398	0.982228	0.827257	0.812555
602	0.189124	0	0.785398	0.982169	0.827434	0.81268
603	0.189438	0	0.785398	0.98211	0.82761	0.812804
604	0.189752	0	0.785398	0.982051	0.827786	0.812928
605	0.190066	0	0.785398	0.981992	0.827962	0.813052
606	0.190381	0	0.785398	0.981932	0.828139	0.813176
607	0.190695	0	0.785398	0.981873	0.828315	0.8133
608	0.191009	0	0.785398	0.981813	0.828491	0.813423
609	0.191323	0	0.785398	0.981754	0.828667	0.813546
610	0.191637	0	0.785398	0.981694	0.828842	0.813669
611	0.191951	0	0.785398	0.981634	0.829018	0.813792
612	0.192265	0	0.785398	0.981574	0.829194	0.813915
613	0.19258	0	0.785398	0.981514	0.829369	0.814037
614	0.192894	0	0.785398	0.981454	0.829545	0.81416
615	0.193208	0	0.785398	0.981393	0.82972	0.814282
616	0.193522	0	0.785398	0.981333	0.829895	0.814404
617	0.193836	0	0.785398	0.981272	0.830071	0.814526
618	0.19415	0	0.785398	0.981212	0.830246	0.814647
619	0.194465	0	0.785398	0.981151	0.830421	0.814769
620	0.194779	0	0.785398	0.981091	0.830596	0.81489
621	0.195093	0	0.785398	0.98103	0.830771	0.815011
622	0.195407	0	0.785398	0.980969	0.830946	0.815132
623	0.195721	0	0.785398	0.980908	0.83112	0.815252
624	0.196035	0	0.785398	0.980847	0.831295	0.815373
625	0.19635	0	0.785398	0.980785	0.83147	0.815493
626	0.196664	0	0.785398	0.980724	0.831644	0.815613
627	0.196978	0	0.785398	0.980663	0.831819	0.815733
628	0.197292	0	0.785398	0.980601	0.831993	0.815853
629	0.197606	0	0.785398	0.980539	0.832167	0.815973
630	0.19792	0	0.785398	0.980478	0.832341	0.816092
631	0.198234	0	0.785398	0.980416	0.832515	0.816211
632	0.198549	0	0.785398	0.980354	0.832689	0.81633
633	0.198863	0	0.785398	0.980292	0.832863	0.816449
634	0.199177	0	0.785398	0.98023	0.833037	0.816568
635	0.199491	0	0.785398	0.980168	0.833211	0.816686
636	0.199805	0	0.785398	0.980105	0.833385	0.816805
637	0.200119	0	0.785398	0.980043	0.833558	0.816923
638	0.200434	0	0.785398	0.97998	0.833732	0.817041
639	0.200748	0	0.785398	0.979918	0.833905	0.817158
640	0.201062	0	0.785398	0.979855	0.834078	0.817276
641	0.201376	0	0.785398	0.979792	0.834252	0.817393
642	0.20169	0	0.785398	0.979729	0.834425	0.817511
643	0.202004	0	0.785398	0.979666	0.834598	0.817628
644	0.202319	0	0.785398	0.979603	0.834771	0.817744
645	0.202633	0	0.785398	0.97954	0.834944	0.817861
646	0.202947	0	0.785398	0.979477	0.835117	0.817978
647	0.203261	0	0.785398	0.979413	0.83529	0.818094
648	0.203575	0	0.785398	0.97935	0.835462	0.81821
649	0.203889	0	0.785398	0.979286	0.835635	0.818326
650	0.204204	0	0.785398	0.979223	0.835807	0.818442
651	0.204518	0	0.785398	0.979159	0.83598	0.818557
652	0.204832	0	0.785398	0.979095	0.836152	0.818673
653	0.205146	0	0.785398	0.979031	0.836324	0.818788
654	0.20546	0	0.785398	0.978967	0.836497	0.818903
655	0.205774	0	0.785398	0.978903	0.836669	0.819018
656	0.206088	0	0.785398	0.978839	0.836841	0.819132
657	0.206403	0	0.785398	0.978774	0.837013	0.819247
658	0.206717	0	0.785398	0.97871	0.837185	0.819361
659	0.207031	0	0.785398	0.978646	0.837356	0.819475
660	0.207345	0	0.785398	0.978581	0.837528	0.819589
661	0.207659	0	0.785398	0.978516	0.8377	0.819703
662	0.207973	0	0.785398	0.978451	0.837871	0.819816
663	0.208288	0	0.785398	0.978386	0.838043	0.81993
664	0.208602	0	0.785398	0.978321	0.838214	0.820043
665	0.208916	0	0.785398	0.978256	0.838385	0.820156
666	0.20923	0	0.785398	0.978191	0.838556	0.820269
667	0.209544	0	0.785398	0.978126	0.838728	0.820381
668	0.209858	0	0.785398	0.97806	0.838899	0.820494
669	0.210173	0	0.785398	0.977995	0.83907	0.820606
670	0.210487	0	0.785398	0.977929	0.83924	0.820718
671	0.210801	0	0.785398	0.977864	0.839411	0.82083
672	0.211115	0	0.785398	0.977798	0.839582	0.820941
673	0.211429	0	0.785398	0.977732	0.839753	0.821053
674	0.211743	0	0.785398	0.977666	0.839923	0.821164
675	0.212058	0	0.785398	0.9776	0.840094	0.821275
676	0.212372	0	0.785398	0.977534	0.840264	0.821386
677	0.212686	0	0.785398	0.977468	0.840434	0.821497
678	0.213	0	0.785398	0.977401	0.840604	0.821608
679	0.213314	0	0.785398	0.977335	0.840775	0.821718
680	0.213628	0	0.785398	0.977268	0.840945	0.821828
681	0.213942	0	0.785398	0.977201	0.841115	0.821938
682	0.214257	0	0.785398	0.977135	0.841284	0.822048
683	0.214571	0	0.785398	0.977068	0.841454	0.822158
684	0.214885	0	0.785398	0.977001	0.841624	0.822267
685	0.215199	0	0.785398	0.976934	0.841794	0.822377
686	0.215513	0	0.785398	0.976867	0.841963	0.822486
687	0.215827	0	0.785398	0.9768	0.842133	0.822595
688	0.216142	0	0.785398	0.976732	0.842302	0.822703
689	0.216456	0	0.785398	0.976665	0.842471	0.822812
690	0.21677	0	0.785398	0.976597	0.84264	0.82292
691	0.217084	0	0.785398	0.97653	0.84281	0.823028
692	0.217398	0	0.785398	0.976462	0.842979	0.823136
693	0.217712	0	0.785398	0.976394	0.843148	0.823244
694	0.218027	0	0.785398	0.976326	0.843316	0.823352
695	0.218341	0	0.785398	0.976258	0.843485	0.823459
696	0.218655	0	0.785398	0.97619	0.843654	0.823567
697	0.218969	0	0.785398	0.976122	0.843823	0.823674
698	0.219283	0	0.785398	0.976054	0.843991	0.823781
699	0.219597	0	0.785398	0.975985	0.84416	0.823887
700	0.219911	0	0.785398	0.975917	0.844328	0.823994
701	0.220226	0	0.785398	0.975848	0.844496	0.8241
702	0.22054	0	0.785398	0.97578	0.844664	0.824206
703	0.220854	0	0.785398	0.975711	0.844833	0.824312
704	0.221168	0	0.785398	0.975642	0.845001	0.824418
705	0.221482	0	0.785398	0.975573	0.845169	0.824524
706	0.221796	0	0.785398	0.975504	0.845336	0.824629
707	0.222111	0	0.785398	0.975435	0.845504	0.824734
708	0.222425	0	0.785398	0.975365	0.845672	0.824839
709	0.222739	0	0.785398	0.975296	0.84584	0.824944
710	0.223053	0	0.785398	0.975227	0.846007	0.825049
711	0.223367	0	0.785398	0.975157	0.846175	0.825153
712	0.223681	0	0.785398	0.975087	0.846342	0.825257
713	0.223996	0	0.785398	0.975018	0.846509	0.825361
714	0.22431	0	0.785398	0.974948	0.846676	0.825465
715	0.224624	0	0.785398	0.974878	0.846844	0.825569
716	0.224938	0	0.785398	0.974808	0.847011	0.825673
717	0.225252	0	0.785398	0.974738	0.847178	0.825776
718	0.225566	0	0.785398	0.974668	0.847344	0.825879
719	0.225881	0	0.785398	0.974597	0.847511	0.825982
720	0.226195	0	0.785398	0.974527	0.847678	0.826085
721	0.226509	0	0.785398	0.974456	0.847845	0.826188
722	0.226823	0	0.785398	0.974386	0.848011	0.82629
723	0.227137	0	0.785398	0.974315	0.848178	0.826392
724	0.227451	0	0.785398	0.974244	0.848344	0.826494
725	0.227765	0	0.785398	0.974173	0.84851	0.826596
726	0.22808	0	0.785398	0.974102	0.848676	0.826698
727	0.228394	0	0.785398	0.974031	0.848843	0.826799
728	0.228708	0	0.785398	0.97396	0.849009	0.826901
729	0.229022	0	0.785398	0.973889	0.849175	0.827002
730	0.229336	0	0.785398	0.973817	0.84934	0.827103
731	0.22965	0	0.785398	0.973746	0.849506	0.827203
732	0.229965	0	0.785398	0.973674	0.849672	0.827304
733	0.230279	0	0.785398	0.973603	0.849838	0.827404
734	0.230593	0	0.785398	0.973531	0.850003	0.827504
735	0.230907	0	0.785398	0.973459	0.850168	0.827604
736	0.231221	0	0.785398	0.973387	0.850334	0.827704
737	0.231535	0	0.785398	0.973315	0.850499	0.827804
738	0.23185	0	0.785398	0.973243	0.850664	0.827903
739	0.232164	0	0.785398	0.973171	0.850829	0.828002
740	0.232478	0	0.785398	0.973099	0.850994	0.828101
741	0.232792	0	0.785398	0.973026	0.851159	0.8282
742	0.233106	0	0.785398	0.972954	0.851324	0.828299
743	0.23342	0	0.785398	0.972881	0.851489	0.828397
744	0.233734	0	0.785398	0.972808	0.851654	0.828496
745	0.234049	0	0.785398	0.972735	0.851818	0.828594
746	0.234363	0	0.785398	0.972663	0.851983	0.828692
747	0.234677	0	0.785398	0.97259	0.852147	0.82879
748	0.234991	0	0.785398	0.972516	0.852312	0.828887
749	0.235305	0	0.785398	0.972443	0.852476	0.828984
750	0.235619	0	0.785398	0.97237	0.85264	0.829082
751	0.235934	0	0.785398	0.972297	0.852804	0.829179
752	0.236248	0	0.785398	0.972223	0.852968	0.829275
753	0.236562	0	0.785398	0.972149	0.853132	0.829372
754	0.236876	0	0.785398	0.972076	0.853296	0.829468
755	0.23719	0	0.785398	0.972002	0.85346	0.829565
756	0.237504	0	0.785398	0.971928	0.853624	0.829661
757	0.237819	0	0.785398	0.971854	0.853787	0.829757
758	0.238133	0	0.785398	0.97178	0.853951	0.829852
759	0.238447	0	0.785398	0.971706	0.854114	0.829948
760	0.238761	0	0.785398	0.971632	0.854277	0.830043
761	0.239075	0	0.785398	0.971557	0.854441	0.830138
762	0.239389	0	0.785398	0.971483	0.854604	0.830233
763	0.239704	0	0.785398	0.971408	0.854767	0.830328
764	0.240018	0	0.785398	0.971334	0.85493	0.830422
765	0.240332	0	0.785398	0.971259	0.855093	0.830517
766	0.240646	0	0.785398	0.971184	0.855256	0.830611
767	0.24096	0	0.785398	0.971109	0.855419	0.830705
768	0.241274	0	0.785398	0.971034	0.855581	0.830799
769	0.241588	0	0.785398	0.970959	0.855744	0.830892
770	0.241903	0	0.785398	0.970884	0.855906	0.830986
771	0.242217	0	0.785398	0.970809	0.856069	0.831079
772	0.242531	0	0.785398	0.970733	0.856231	0.831172
773	0.242845	0	0.785398	0.970658	0.856393	0.831265
774	0.243159	0	0.785398	0.970582	0.856555	0.831357
775	0.243473	0	0.785398	0.970506	0.856718	0.83145
776	0.243788	0	0.785398	0.970431	0.85688	0.831542
777	0.244102	0	0.785398	0.970355	0.857041	0.831634
778	0.244416	0	0.785398	0.970279	0.857203	0.831726
779	0.24473	0	0.785398	0.970203	0.857365	0.831818
780	0.245044	0	0.785398	0.970127	0.857527	0.831909
781	0.245358	0	0.785398	0.97005	0.857688	0.832001
782	0.245673	0	0.785398	0.969974	0.85785	0.832092
783	0.245987	0	0.785398	0.969898	0.858011	0.832183
784	0.246301	0	0.785398	0.969821	0.858172	0.832274
785	0.246615	0	0.785398	0.969744	0.858334	0.832364
786	0.246929	0	0.785398	0.969668	0.858495	0.832455
787	0.247243	0	0.785398	0.969591	0.858656	0.832545
788	0.247558	0	0.785398	0.969514	0.858817	0.832635
789	0.247872	0	0.785398	0.969437	0.858978	0.832725
790	0.248186	0	0.785398	0.96936	0.859139	0.832814
791	0.2485	0	0.785398	0.969282	0.859299	0.832904
792	0.248814	0	0.785398	0.969205	0.85946	0.832993
793	0.249128	0	0.785398	0.969128	0.859621	0.833082
794	0.249442	0	0.785398	0.96905	0.859781	0.833171
795	0.249757	0	0.785398	0.968973	0.859941	0.83326
796	0.250071	0	0.785398	0.968895	0.860102	0.833348
797	0.250385	0	0.785398	0.968817	0.860262	0.833436
798	0.250699	0	0.785398	0.968739	0.860422	0.833525
799	0.251013	0	0.785398	0.968661	0.860582	0.833612
800	0.251327	0	0.785398	0.968583	0.860742	0.8337
801	0.251642	0	0.785398	0.968505	0.860902	0.833788
802	0.251956	0	0.785398	0.968427	0.861062	0.833875
803	0.25227	0	0.785398	0.968348	0.861221	0.833962
804	0.252584	0	0.785398	0.96827	0.861381	0.834049
805	0.252898	0	0.785398	0.968191	0.861541	0.834136
806	0.253212	0	0.785398	0.968113	0.8617	0.834223
807	0.253527	0	0.785398	0.968034	0.861859	0.834309
808	0.253841	0	0.785398	0.967955	0.862019	0.834395
809	0.254155	0	0.785398	0.967876	0.862178	0.834481
810	0.254469	0	0.785398	0.967797	0.862337	0.834567
811	0.254783	0	0.785398	0.967718	0.862496	0.834653
812	0.255097	0	0.785398	0.967639	0.862655	0.834738
813	0.255411	0	0.785398	0.967559	0.862814	0.834824
814	0.255726	0	0.785398	0.96748	0.862973	0.834909
815	0.25604	0	0.785398	0.9674	0.863131	0.834994
816	0.256354	0	0.785398	0.967321	0.86329	0.835078
817	0.256668	0	0.785398	0.967241	0.863448	0.835163
818	0.256982	0	0.785398	0.967161	0.863607	0.835247
819	0.257296	0	0.785398	0.967081	0.863765	0.835331
820	0.257611	0	0.785398	0.967001	0.863923	0.835415
821	0.257925	0	0.785398	0.966921	0.864082	0.835499
822	0.258239	0	0.785398	0.966841	0.86424	0.835583
823	0.258553	0	0.785398	0.966761	0.864398	0.835666
824	0.258867	0	0.785398	0.966681	0.864556	0.835749
825	0.259181	0	0.785398	0.9666	0.864713	0.835832
826	0.259496	0	0.785398	0.96652	0.864871	0.835915
827	0.25981	0	0.785398	0.966439	0.865029	0.835998
828	0.260124	0	0.785398	0.966358	0.865186	0.83608
829	0.260438	0	0.785398	0.966277	0.865344	0.836162
830	0.260752	0	0.785398	0.966196	0.865501	0.836244
831	0.261066	0	0.785398	0.966115	0.865659	0.836326
832	0.261381	0	0.785398	0.966034	0.865816	0.836408
833	0.261695	0	0.785398	0.965953	0.865973	0.836489
834	0.262009	0	0.785398	0.965872	0.86613	0.83657
835	0.262323	0	0.785398	0.96579	0.866287	0.836652
836	0.262637	0	0.785398	0.965709	0.866444	0.836732
837	0.262951	0	0.785398	0.965627	0.866601	0.836813
838	0.263265	0	0.785398	0.965545	0.866758	0.836894
839	0.26358	0	0.785398	0.965464	0.866914	0.836974
840	0.263894	0	0.785398	0.965382	0.867071	0.837054
841	0.264208	0	0.785398	0.9653	0.867227	0.837134
842	0.264522	0	0.785398	0.965218	0.867384	0.837214
843	0.264836	0	0.785398	0.965135	0.86754	0.837293
844	0.26515	0	0.785398	0.965053	0.867696	0.837373
845	0.265465	0	0.785398	0.964971	0.867852	0.837452
846	0.265779	0	0.785398	0.964888	0.868008	0.837531
847	0.266093	0	0.785398	0.964806	0.868164	0.83761
848	0.266407	0	0.785398	0.964723	0.86832	0.837688
849	0.266721	0	0.785398	0.96464	0.868476	0.837767
850	0.267035	0	0.785398	0.964557	0.868632	0.837845
851	0.26735	0	0.785398	0.964474	0.868787	0.837923
852	0.267664	0	0.785398	0.964391	0.868943	0.838001
853	0.267978	0	0.785398	0.964308	0.869098	0.838078
854	0.268292	0	0.785398	0.964225	0.869253	0.838156
855	0.268606	0	0.785398	0.964142	0.869409	0.838233
856	0.26892	0	0.785398	0.964058	0.869564	0.83831
857	0.269234	0	0.785398	0.963975	0.869719	0.838387
858	0.269549	0	0.785398	0.963891	0.869874	0.838464
859	0.269863	0	0.785398	0.963807	0.870029	0.83854
860	0.270177	0	0.785398	0.963724	0.870184	0.838617
861	0.270491	0	0.785398	0.96364	0.870339	0.838693
862	0.270805	0	0.785398	0.963556	0.870493	0.838769
863	0.271119	0	0.785398	0.963472	0.870648	0.838844
864	0.271434	0	0.785398	0.963388	0.870802	0.83892
865	0.271748	0	0.785398	0.963303	0.870957	0.838995
866	0.272062	0	0.785398	0.963219	0.871111	0.839071
867	0.272376	0	0.785398	0.963134	0.871265	0.839145
868	0.27269	0	0.785398	0.96305	0.871419	0.83922
869	0.273004	0	0.785398	0.962965	0.871573	0.839295
870	0.273319	0	0.785398	0.96288	0.871727	0.839369
871	0.273633	0	0.785398	0.962796	0.871881	0.839443
872	0.273947	0	0.785398	0.962711	0.872035	0.839517
873	0.274261	0	0.785398	0.962626	0.872189	0.839591
874	0.274575	0	0.785398	0.96254	0.872342	0.839665
875	0.274889	0	0.785398	0.962455	0.872496	0.839738
876	0.275204	0	0.785398	0.96237	0.872649	0.839812
877	0.275518	0	0.785398	0.962284	0.872803	0.839885
878	0.275832	0	0.785398	0.962199	0.872956	0.839958
879	0.276146	0	0.785398	0.962113	0.873109	0.84003
880	0.27646	0	0.785398	0.962028	0.873262	0.840103
881	0.276774	0	0.785398	0.961942	0.873415	0.840175
882	0.277088	0	0.785398	0.961856	0.873568	0.840247
883	0.277403	0	0.785398	0.96177	0.873721	0.840319
884	0.277717	0	0.785398	0.961684	0.873874	0.840391
885	0.278031	0	0.785398	0.961598	0.874027	0.840462
886	0.278345	0	0.785398	0.961511	0.874179	0.840533
887	0.278659	0	0.785398	0.961425	0.874332	0.840605
888	0.278973	0	0.785398	0.961339	0.874484	0.840676
889	0.279288	0	0.785398	0.961252	0.874637	0.840746
890	0.279602	0	0.785398	0.961165	0.874789	0.840817
891	0.279916	0	0.785398	0.961079	0.874941	0.840887
892	0.28023	0	0.785398	0.960992	0.875093	0.840957
893	0.280544	0	0.785398	0.960905	0.875245	0.841027
894	0.280858	0	0.785398	0.960818	0.875397	0.841097
895	0.281173	0	0.785398	0.960731	0.875549	0.841167
896	0.281487	0	0.785398	0.960644	0.875701	0.841236
897	0.281801	0	0.785398	0.960556	0.875852	0.841305
898	0.282115	0	0.785398	0.960469	0.876004	0.841374
899	0.282429	0	0.785398	0.960381	0.876155	0.841443
900	0.282743	0	0.785398	0.960294	0.876307	0.841512
901	0.283057	0	0.785398	0.960206	0.876458	0.84158
902	0.283372	0	0.785398	0.960118	0.876609	0.841648
903	0.283686	0	0.785398	0.96003	0.87676	0.841716
904	0.284	0	0.785398	0.959942	0.876911	0.841784
905	0.284314	0	0.785398	0.959854	0.877062	0.841852
906	0.284628	0	0.785398	0.959766	0.877213	0.841919
907	0.284942	0	0.785398	0.959678	0.877364	0.841987
908	0.285257	0	0.785398	0.959589	0.877515	0.842054
909	0.285571	0	0.785398	0.959501	0.877665	0.842121
910	0.285885	0	0.785398	0.959412	0.877816	0.842187
911	0.286199	0	0.785398	0.959324	0.877966	0.842254
912	0.286513	0	0.785398	0.959235	0.878117	0.84232
913	0.286827	0	0.785398	0.959146	0.878267	0.842386
914	0.287142	0	0.785398	0.959057	0.878417	0.842452
915	0.287456	0	0.785398	0.958968	0.878567	0.842518
916	0.28777	0	0.785398	0.958879	0.878717	0.842584
917	0.288084	0	0.785398	0.95879	0.878867	0.842649
918	0.288398	0	0.785398	0.958701	0.879017	0.842714
919	0.288712	0	0.785398	0.958611	0.879167	0.842779
920	0.289027	0	0.785398	0.958522	0.879316	0.842844
921	0.289341	0	0.785398	0.958432	0.879466	0.842908
922	0.289655	0	0.785398	0.958343	0.879615	0.842973
923	0.289969	0	0.785398	0.958253	0.879765	0.843037
924	0.290283	0	0.785398	0.958163	0.879914	0.843101
925	0.290597	0	0.785398	0.958073	0.880063	0.843165
926	0.290911	0	0.785398	0.957983	0.880212	0.843228
927	0.291226	0	0.785398	0.957893	0.880361	0.843292
928	0.29154	0	0.785398	0.957802	0.88051	0.843355
929	0.291854	0	0.785398	0.957712	0.880659	0.843418
930	0.292168	0	0.785398	0.957622	0.880808	0.843481
931	0.292482	0	0.785398	0.957531	0.880957	0.843544
932	0.292796	0	0.785398	0.95744	0.881105	0.843606
933	0.293111	0	0.785398	0.95735	0.881254	0.843668
934	0.293425	0	0.785398	0.957259	0.881402	0.84373
935	0.293739	0	0.785398	0.957168	0.881551	0.843792
936	0.294053	0	0.785398	0.957077	0.881699	0.843854
937	0.294367	0	0.785398	0.956986	0.881847	0.843915
938	0.294681	0	0.785398	0.956895	0.881995	0.843977
939	0.294996	0	0.785398	0.956803	0.882143	0.844038
940	0.29531	0	0.785398	0.956712	0.882291	0.844099
941	0.295624	0	0.785398	0.956621	0.882439	0.844159
942	0.295938	0	0.785398	0.956529	0.882587	0.84422
943	0.296252	0	0.785398	0.956437	0.882734	0.84428
944	0.296566	0	0.785398	0.956346	0.882882	0.84434
945	0.296881	0	0.785398	0.956254	0.88303	0.8444
946	0.297195	0	0.785398	0.956162	0.883177	0.84446
947	0.297509	0	0.785398	0.95607	0.883324	0.84452
948	0.297823	0	0.785398	0.955978	0.883471	0.844579
949	0.298137	0	0.785398	0.955885	0.883619	0.844638
950	0.298451	0	0.785398	0.955793	0.883766	0.844697
951	0.298765	0	0.785398	0.955701	0.883913	0.844756
952	0.29908	0	0.785398	0.955608	0.884059	0.844814
953	0.299394	0	0.785398	0.955515	0.884206	0.844873
954	0.299708	0	0.785398	0.955423	0.884353	0.844931
955	0.300022	0	0.785398	0.95533	0.8845	0.844989
956	0.300336	0	0.785398	0.955237	0.884646	0.845047
957	0.30065	0	0.785398	0.955144	0.884793	0.845104
958	0.300965	0	0.785398	0.955051	0.884939	0.845162
959	0.301279	0	0.785398	0.954958	0.885085	0.845219
960	0.301593	0	0.785398	0.954865	0.885231	0.845276
961	0.301907	0	0.785398	0.954771	0.885377	0.845333
962	0.302221	0	0.785398	0.954678	0.885523	0.845389
963	0.302535	0	0.785398	0.954584	0.885669	0.845446
964	0.30285	0	0.785398	0.954491	0.885815	0.845502
965	0.303164	0	0.785398	0.954397	0.885961	0.845558
966	0.303478	0	0.785398	0.954303	0.886107	0.845614
967	0.303792	0	0.785398	0.954209	0.886252	0.84567
968	0.304106	0	0.785398	0.954115	0.886398	0.845725
969	0.30442	0	0.785398	0.954021	0.886543	0.84578
970	0.304734	0	0.785398	0.953927	0.886688	0.845836
971	0.305049	0	0.785398	0.953832	0.886833	0.84589
972	0.305363	0	0.785398	0.953738	0.886979	0.845945
973	0.305677	0	0.785398	0.953643	0.887124	0.846
974	0.305991	0	0.785398	0.953549	0.887269	0.846054
975	0.306305	0	0.785398	0.953454	0.887413	0.846108
976	0.306619	0	0.785398	0.953359	0.887558	0.846162
977	0.306934	0	0.785398	0.953265	0.887703	0.846216
978	0.307248	0	0.785398	0.95317	0.887848	0.846269
979	0.307562	0	0.785398	0.953074	0.887992	0.846323
980	0.307876	0	0.785398	0.952979	0.888136	0.846376
981	0.30819	0	0.785398	0.952884	0.888281	0.846429
982	0.308504	0	0.785398	0.952789	0.888425	0.846481
983	0.308819	0	0.785398	0.952693	0.888569	0.846534
984	0.309133	0	0.785398	0.952598	0.888713	0.846586
985	0.309447	0	0.785398	0.952502	0.888857	0.846638
986	0.309761	0	0.785398	0.952406	0.889001	0.84669
987	0.310075	0	0.785398	0.952311	0.889145	0.846742
988	0.310389	0	0.785398	0.952215	0.889289	0.846794
989	0.310704	0	0.785398	0.952119	0.889432	0.846845
990	0.311018	0	0.785398	0.952023	0.889576	0.846896
991	0.311332	0	0.785398	0.951926	0.889719	0.846947
992	0.311646	0	0.785398	0.95183	0.889863	0.846998
993	0.31196	0	0.785398	0.951734	0.890006	0.847049
994	0.312274	0	0.785398	0.951637	0.890149	0.847099
995	0.312588	0	0.785398	0.951541	0.890292	0.847149
996	0.312903	0	0.785398	0.951444	0.890435	0.847199
997	0.313217	0	0.785398	0.951347	0.890578	0.847249
998	0.313531	0	0.785398	0.95125	0.890721	0.847299
999	0.313845	0	0.785398	0.951154	0.890864	0.847348
1000	0.314159	0	0.785398	0.951057	0.891007	0.847398
1001	0.314473	0	0.785398	0.950959	0.891149	0.847447
1002	0.314788	0	0.785398	0.950862	0.891292	0.847495
1003	0.315102	0	0.785398	0.950765	0.891434	0.847544
1004	0.315416	0	0.785398	0.950667	0.891576	0.847593
1005	0.31573	0	0.785398	0.95057	0.891719	0.847641
1006	0.316044	0	0.785398	0.950472	0.891861	0.847689
1007	0.316358	0	0.785398	0.950375	0.892003	0.847737
1008	0.316673	0	0.785398	0.950277	0.892145	0.847784
1009	0.316987	0	0.785398	0.950179	0.892287	0.847832
1010	0.317301	0	0.785398	0.950081	0.892428	0.847879
1011	0.317615	0	0.785398	0.949983	0.89257	0.847926
1012	0.317929	0	0.785398	0.949885	0.892712	0.847973
1013	0.318243	0	0.785398	0.949787	0.892853	0.84802
1014	0.318557	0	0.785398	0.949688	0.892995	0.848066
1015	0.318872	0	0.785398	0.94959	0.893136	0.848113
1016	0.319186	0	0.785398	0.949491	0.893277	0.848159
1017	0.3195	0	0.785398	0.949393	0.893418	0.848205
1018	0.319814	0	0.785398	0.949294	0.89356	0.848251
1019	0.320128	0	0.785398	0.949195	0.893701	0.848296
1020	0.320442	0	0.785398	0.949096	0.893841	0.848341
1021	0.320757	0	0.785398	0.948997	0.893982	0.848387
1022	0.321071	0	0.785398	0.948898	0.894123	0.848432
1023	0.321385	0	0.785398	0.948799	0.894264	0.848476
1024	0.321699	0	0.785398	0.9487	0.894404	0.848521
1025	0.322013	0	0.785398	0.9486	0.894545	0.848565
1026	0.322327	0	0.785398	0.948501	0.894685	0.848609
1027	0.322642	0	0.785398	0.948401	0.894825	0.848653
1028	0.322956	0	0.785398	0.948302	0.894966	0.848697
1029	0.32327	0	0.785398	0.948202	0.895106	0.848741
1030	0.323584	0	0.785398	0.948102	0.895246	0.848784
1031	0.323898	0	0.785398	0.948002	0.895386	0.848827
1032	0.324212	0	0.785398	0.947902	0.895525	0.84887
1033	0.324527	0	0.785398	0.947802	0.895665	0.848913
1034	0.324841	0	0.785398	0.947702	0.895805	0.848956
1035	0.325155	0	0.785398	0.947601	0.895944	0.848998
1036	0.325469	0	0.785398	0.947501	0.896084	0.84904
1037	0.325783	0	0.785398	0.9474	0.896223	0.849082
1038	0.326097	0	0.785398	0.9473	0.896363	0.849124
1039	0.326411	0	0.785398	0.947199	0.896502	0.849166
1040	0.326726	0	0.785398	0.947098	0.896641	0.849207
1041	0.32704	0	0.785398	0.946997	0.89678	0.849248
1042	0.327354	0	0.785398	0.946896	0.896919	0.849289
1043	0.327668	0	0.785398	0.946795	0.897058	0.84933
1044	0.327982	0	0.785398	0.946694	0.897197	0.849371
1045	0.328296	0	0.785398	0.946593	0.897335	0.849411
1046	0.328611	0	0.785398	0.946492	0.897474	0.849452
1047	0.328925	0	0.785398	0.94639	0.897613	0.849492
1048	0.329239	0	0.785398	0.946289	0.897751	0.849532
1049	0.329553	0	0.785398	0.946187	0.897889	0.849571
1050	0.329867	0	0.785398	0.946085	0.898028	0.849611
1051	0.330181	0	0.785398	0.945984	0.898166	0.84965
1052	0.330496	0	0.785398	0.945882	0.898304	0.849689
1053	0.33081	0	0.785398	0.94578	0.898442	0.849728
1054	0.331124	0	0.785398	0.945678	0.89858	0.849767
1055	0.331438	0	0.785398	0.945575	0.898718	0.849805
1056	0.331752	0	0.785398	0.945473	0.898855	0.849843
1057	0.332066	0	0.785398	0.945371	0.898993	0.849882
1058	0.332381	0	0.785398	0.945268	0.89913	0.849919
1059	0.332695	0	0.785398	0.945166	0.899268	0.849957
1060	0.333009	0	0.785398	0.945063	0.899405	0.849995
1061	0.333323	0	0.785398	0.94496	0.899543	0.850032
1062	0.333637	0	0.785398	0.944857	0.89968	0.850069
1063	0.333951	0	0.785398	0.944755	0.899817	0.850106
1064	0.334265	0	0.785398	0.944652	0.899954	0.850143
1065	0.33458	0	0.785398	0.944548	0.900091	0.850179
1066	0.334894	0	0.785398	0.944445	0.900228	0.850216
1067	0.335208	0	0.785398	0.944342	0.900364	0.850252
1068	0.335522	0	0.785398	0.944239	0.900501	0.850288
1069	0.335836	0	0.785398	0.944135	0.900638	0.850323
1070	0.33615	0	0.785398	0.944031	0.900774	0.850359
1071	0.336465	0	0.785398	0.943928	0.90091	0.850394
1072	0.336779	0	0.785398	0.943824	0.901047	0.85043
1073	0.337093	0	0.785398	0.94372	0.901183	0.850465
1074	0.337407	0	0.785398	0.943616	0.901319	0.850499
1075	0.337721	0	0.785398	0.943512	0.901455	0.850534
1076	0.338035	0	0.785398	0.943408	0.901591	0.850568
1077	0.33835	0	0.785398	0.943304	0.901727	0.850602
1078	0.338664	0	0.785398	0.943199	0.901863	0.850636
1079	0.338978	0	0.785398	0.943095	0.901998	0.85067
1080	0.339292	0	0.785398	0.942991	0.902134	0.850704
1081	0.339606	0	0.785398	0.942886	0.902269	0.850737
1082	0.33992	0	0.785398	0.942781	0.902405	0.85077
1083	0.340234	0	0.785398	0.942676	0.90254	0.850803
1084	0.340549	0	0.785398	0.942572	0.902675	0.850836
1085	0.340863	0	0.785398	0.942467	0.902811	0.850869
1086	0.341177	0	0.785398	0.942362	0.902946	0.850901
1087	0.341491	0	0.785398	0.942256	0.903081	0.850933
1088	0.341805	0	0.785398	0.942151	0.903215	0.850965
1089	0.342119	0	0.785398	0.942046	0.90335	0.850997
1090	0.342434	0	0.785398	0.94194	0.903485	0.851029
1091	0.342748	0	0.785398	0.941835	0.90362	0.85106
1092	0.343062	0	0.785398	0.941729	0.903754	0.851092
1093	0.343376	0	0.785398	0.941623	0.903889	0.851123
1094	0.34369	0	0.785398	0.941518	0.904023	0.851153
1095	0.344004	0	0.785398	0.941412	0.904157	0.851184
1096	0.344319	0	0.785398	0.941306	0.904291	0.851215
1097	0.344633	0	0.785398	0.9412	0.904425	0.851245
1098	0.344947	0	0.785398	0.941093	0.904559	0.851275
1099	0.345261	0	0.785398	0.940987	0.904693	0.851305
1100	0.345575	0	0.785398	0.940881	0.904827	0.851334
1101	0.345889	0	0.785398	0.940774	0.904961	0.851364
1102	0.346204	0	0.785398	0.940668	0.905094	0.851393
1103	0.346518	0	0.785398	0.940561	0.905228	0.851422
1104	0.346832	0	0.785398	0.940454	0.905361	0.851451
1105	0.347146	0	0.785398	0.940348	0.905495	0.85148
1106	0.34746	0	0.785398	0.940241	0.905628	0.851508
1107	0.347774	0	0.785398	0.940134	0.905761	0.851537
1108	0.348088	0	0.785398	0.940026	0.905894	0.851565
1109	0.348403	0	0.785398	0.939919	0.906027	0.851592
1110	0.348717	0	0.785398	0.939812	0.90616	0.85162
1111	0.349031	0	0.785398	0.939705	0.906293	0.851648
1112	0.349345	0	0.785398	0.939597	0.906426	0.851675
1113	0.349659	0	0.785398	0.939489	0.906558	0.851702
1114	0.349973	0	0.785398	0.939382	0.906691	0.851729
1115	0.350288	0	0.785398	0.939274	0.906823	0.851756
1116	0.350602	0	0.785398	0.939166	0.906956	0.851782
1117	0.350916	0	0.785398	0.939058	0.907088	0.851809
1118	0.35123	0	0.785398	0.93895	0.90722	0.851835
1119	0.351544	0	0.785398	0.938842	0.907352	0.851861
1120	0.351858	0	0.785398	0.938734	0.907484	0.851886
1121	0.352173	0	0.785398	0.938626	0.907616	0.851912
1122	0.352487	0	0.785398	0.938517	0.907748	0.851937
1123	0.352801	0	0.785398	0.938409	0.90788	0.851962
1124	0.353115	0	0.785398	0.9383	0.908012	0.851987
1125	0.353429	0	0.785398	0.938191	0.908143	0.852012
1126	0.353743	0	0.785398	0.938083	0.908275	0.852037
1127	0.354057	0	0.785398	0.937974	0.908406	0.852061
1128	0.354372	0	0.785398	0.937865	0.908537	0.852085
1129	0.354686	0	0.785398	0.937756	0.908669	0.852109
1130	0.355	0	0.785398	0.937646	0.9088	0.852133
1131	0.355314	0	0.785398	0.937537	0.908931	0.852156
1132	0.355628	0	0.785398	0.937428	0.909062	0.85218
1133	0.355942	0	0.785398	0.937318	0.909193	0.852203
1134	0.356257	0	0.785398	0.937209	0.909323	0.852226
1135	0.356571	0	0.785398	0.937099	0.909454	0.852249
1136	0.356885	0	0.785398	0.93699	0.909585	0.852271
1137	0.357199	0	0.785398	0.93688	0.909715	0.852294
1138	0.357513	0	0.785398	0.93677	0.909845	0.852316
1139	0.357827	0	0.785398	0.93666	0.909976	0.852338
1140	0.358142	0	0.785398	0.93655	0.910106	0.85236
1141	0.358456	0	0.785398	0.93644	0.910236	0.852381
1142	0.35877	0	0.785398	0.936329	0.910366	0.852403
1143	0.359084	0	0.785398	0.936219	0.910496	0.852424
1144	0.359398	0	0.785398	0.936109	0.910626	0.852445
1145	0.359712	0	0.785398	0.935998	0.910756	0.852466
1146	0.360027	0	0.785398	0.935887	0.910885	0.852486
1147	0.360341	0	0.785398	0.935777	0.911015	0.852507
1148	0.360655	0	0.785398	0.935666	0.911145	0.852527
1149	0.360969	0	0.785398	0.935555	0.911274	0.852547
1150	0.361283	0	0.785398	0.935444	0.911403	0.852567
1151	0.361597	0	0.785398	0.935333	0.911533	0.852586
1152	0.361911	0	0.785398	0.935222	0.911662	0.852606
1153	0.362226	0	0.785398	0.93511	0.911791	0.852625
1154	0.36254	0	0.785398	0.934999	0.91192	0.852644
1155	0.362854	0	0.785398	0.934888	0.912049	0.852663
1156	0.363168	0	0.785398	0.934776	0.912177	0.852682
1157	0.363482	0	0.785398	0.934664	0.912306	0.8527
1158	0.363796	0	0.785398	0.934553	0.912435	0.852718
1159	0.364111	0	0.785398	0.934441	0.912563	0.852736
1160	0.364425	0	0.785398	0.934329	0.912692	0.852754
1161	0.364739	0	0.785398	0.934217	0.91282	0.852772
1162	0.365053	0	0.785398	0.934105	0.912948	0.852789
1163	0.365367	0	0.785398	0.933993	0.913076	0.852807
1164	0.365681	0	0.785398	0.93388	0.913204	0.852824
1165	0.365996	0	0.785398	0.933768	0.913332	0.85284
1166	0.36631	0	0.785398	0.933655	0.91346	0.852857
1167	0.366624	0	0.785398	0.933543	0.913588	0.852874
1168	0.366938	0	0.785398	0.93343	0.913716	0.85289
1169	0.367252	0	0.785398	0.933317	0.913843	0.852906
1170	0.367566	0	0.785398	0.933205	0.913971	0.852922
1171	0.36788	0	0.785398	0.933092	0.914098	0.852938
1172	0.368195	0	0.785398	0.932979	0.914226	0.852953
1173	0.368509	0	0.785398	0.932866	0.914353	0.852968
1174	0.368823	0	0.785398	0.932752	0.91448	0.852983
1175	0.369137	0	0.785398	0.932639	0.914607	0.852998
1176	0.369451	0	0.785398	0.932526	0.914734	0.853013
1177	0.369765	0	0.785398	0.932412	0.914861	0.853028
1178	0.37008	0	0.785398	0.932299	0.914988	0.853042
1179	0.370394	0	0.785398	0.932185	0.915115	0.853056
1180	0.370708	0	0.785398	0.932071	0.915241	0.85307
1181	0.371022	0	0.785398	0.931957	0.915368	0.853084
1182	0.371336	0	0.785398	0.931843	0.915494	0.853097
1183	0.37165	0	0.785398	0.931729	0.91562	0.85311
1184	0.371965	0	0.785398	0.931615	0.915747	0.853124
1185	0.372279	0	0.785398	0.931501	0.915873	0.853136
1186	0.372593	0	0.785398	0.931387	0.915999	0.853149
1187	0.372907	0	0.785398	0.931272	0.916125	0.853162
1188	0.373221	0	0.785398	0.931158	0.916251	0.853174
1189	0.373535	0	0.785398	0.931043	0.916377	0.853186
1190	0.37385	0	0.785398	0.930928	0.916502	0.853198
1191	0.374164	0	0.785398	0.930814	0.916628	0.85321
1192	0.374478	0	0.785398	0.930699	0.916754	0.853221
1193	0.374792	0	0.785398	0.930584	0.916879	0.853233
1194	0.375106	0	0.785398	0.930469	0.917004	0.853244
1195	0.37542	0	0.785398	0.930354	0.91713	0.853255
1196	0.375734	0	0.785398	0.930238	0.917255	0.853266
1197	0.376049	0	0.785398	0.930123	0.91738	0.853276
1198	0.376363	0	0.785398	0.930008	0.917505	0.853287
1199	0.376677	0	0.785398	0.929892	0.91763	0.853297
1200	0.376991	0	0.785398	0.929776	0.917755	0.853307
1201	0.377305	0	0.785398	0.929661	0.917879	0.853316
1202	0.377619	0	0.785398	0.929545	0.918004	0.853326
1203	0.377934	0	0.785398	0.929429	0.918129	0.853335
1204	0.378248	0	0.785398	0.929313	0.918253	0.853345
1205	0.378562	0	0.785398	0.929197	0.918377	0.853354
1206	0.378876	0	0.785398	0.929081	0.918502	0.853362
1207	0.37919	0	0.785398	0.928965	0.918626	0.853371
1208	0.379504	0	0.785398	0.928848	0.91875	0.853379
1209	0.379819	0	0.785398	0.928732	0.918874	0.853387
1210	0.380133	0	0.785398	0.928615	0.918998	0.853395
1211	0.380447	0	0.785398	0.928499	0.919122	0.853403
1212	0.380761	0	0.785398	0.928382	0.919245	0.853411
1213	0.381075	0	0.785398	0.928265	0.919369	0.853418
1214	0.381389	0	0.785398	0.928148	0.919492	0.853425
1215	0.381704	0	0.785398	0.928031	0.919616	0.853432
1216	0.382018	0	0.785398	0.927914	0.919739	0.853439
1217	0.382332	0	0.785398	0.927797	0.919863	0.853446
1218	0.382646	0	0.785398	0.92768	0.919986	0.853452
1219	0.38296	0	0.785398	0.927563	0.920109	0.853459
1220	0.383274	0	0.785398	0.927445	0.920232	0.853465
1221	0.383588	0	0.785398	0.927328	0.920355	0.85347
1222	0.383903	0	0.785398	0.92721	0.920478	0.853476
1223	0.384217	0	0.785398	0.927092	0.9206	0.853481
1224	0.384531	0	0.785398	0.926974	0.920723	0.853487
1225	0.384845	0	0.785398	0.926857	0.920845	0.853492
1226	0.385159	0	0.785398	0.926739	0.920968	0.853497
1227	0.385473	0	0.785398	0.926621	0.92109	0.853501
1228	0.385788	0	0.785398	0.926502	0.921213	0.853506
1229	0.386102	0	0.785398	0.926384	0.921335	0.85351
1230	0.386416	0	0.785398	0.926266	0.921457	0.853514
1231	0.38673	0	0.785398	0.926147	0.921579	0.853518
1232	0.387044	0	0.785398	0.926029	0.921701	0.853521
1233	0.387358	0	0.785398	0.92591	0.921823	0.853525
1234	0.387673	0	0.785398	0.925791	0.921944	0.853528
1235	0.387987	0	0.785398	0.925673	0.922066	0.853531
1236	0.388301	0	0.785398	0.925554	0.922187	0.853534
1237	0.388615	0	0.785398	0.925435	0.922309	0.853537
1238	0.388929	0	0.785398	0.925316	0.92243	0.853539
1239	0.389243	0	0.785398	0.925196	0.922552	0.853541
1240	0.389557	0	0.785398	0.925077	0.922673	0.853544
1241	0.389872	0	0.785398	0.924958	0.922794	0.853545
1242	0.390186	0	0.785398	0.924838	0.922915	0.853547
1243	0.3905	0	0.785398	0.924719	0.923036	0.853549
1244	0.390814	0	0.785398	0.924599	0.923157	0.85355
1245	0.391128	0	0.785398	0.92448	0.923277	0.853551
1246	0.391442	0	0.785398	0.92436	0.923398	0.853552
1247	0.391757	0	0.785398	0.92424	0.923518	0.853553
1248	0.392071	0	0.785398	0.92412	0.923639	0.853553
1249	0.392385	0	0.785398	0.924	0.923759	0.853553
1250	0.392699	0	0.785398	0.92388	0.92388	0.853553
1251	0.393013	0	0.785398	0.923759	0.924	0.853553
1252	0.393327	0	0.785398	0.923639	0.92412	0.853553
1253	0.393642	0	0.785398	0.923518	0.92424	0.853553
1254	0.393956	0	0.785398	0.923398	0.92436	0.853552
1255	0.39427	0	0.785398	0.923277	0.92448	0.853551
1256	0.394584	0	0.785398	0.923157	0.924599	0.85355
1257	0.394898	0	0.785398	0.923036	0.924719	0.853549
1258	0.395212	0	0.785398	0.922915	0.924838	0.853547
1259	0.395527	0	0.785398	0.922794	0.924958	0.853545
1260	0.395841	0	0.785398	0.922673	0.925077	0.853544
1261	0.396155	0	0.785398	0.922552	0.925196	0.853541
1262	0.396469	0	0.785398	0.92243	0.925316	0.853539
1263	0.396783	0	0.785398	0.922309	0.925435	0.853537
1264	0.397097	0	0.785398	0.922187	0.925554	0.853534
1265	0.397411	0	0.785398	0.922066	0.925673	0.853531
1266	0.397726	0	0.785398	0.921944	0.925791	0.853528
1267	0.39804	0	0.785398	0.921823	0.92591	0.853525
1268	0.398354	0	0.785398	0.921701	0.926029	0.853521
1269	0.398668	0	0.785398	0.921579	0.926147	0.853518
1270	0.398982	0	0.785398	0.921457	0.926266	0.853514
1271	0.399296	0	0.785398	0.921335	0.926384	0.85351
1272	0.399611	0	0.785398	0.921213	0.926502	0.853506
1273	0.399925	0	0.785398	0.92109	0.926621	0.853501
1274	0.400239	0	0.785398	0.920968	0.926739	0.853497
1275	0.400553	0	0.785398	0.920845	0.926857	0.853492
1276	0.400867	0	0.785398	0.920723	0.926974	0.853487
1277	0.401181	0	0.785398	0.9206	0.927092	0.853481
1278	0.401496	0	0.785398	0.920478	0.92721	0.853476
1279	0.40181	0	0.785398	0.920355	0.927328	0.85347
1280	0.402124	0	0.785398	0.920232	0.927445	0.853465
1281	0.402438	0	0.785398	0.920109	0.927563	0.853459
1282	0.402752	0	0.785398	0.919986	0.92768	0.853452
1283	0.403066	0	0.785398	0.919863	0.927797	0.853446
1284	0.40338	0	0.785398	0.919739	0.927914	0.853439
1285	0.403695	0	0.785398	0.919616	0.928031	0.853432
1286	0.404009	0	0.785398	0.919492	0.928148	0.853425
1287	0.404323	0	0.785398	0.919369	0.928265	0.853418
1288	0.404637	0	0.785398	0.919245	0.928382	0.853411
1289	0.404951	0	0.785398	0.919122	0.928499	0.853403
1290	0.405265	0	0.785398	0.918998	0.928615	0.853395
1291	0.40558	0	0.785398	0.918874	0.928732	0.853387
1292	0.405894	0	0.785398	0.91875	0.928848	0.853379
1293	0.406208	0	0.785398	0.918626	0.928965	0.853371
1294	0.406522	0	0.785398	0.918502	0.929081	0.853362
1295	0.406836	0	0.785398	0.918377	0.929197	0.853354
1296	0.40715	0	0.785398	0.918253	0.929313	0.853345
1297	0.407465	0	0.785398	0.918129	0.929429	0.853335
1298	0.407779	0	0.785398	0.918004	0.929545	0.853326
1299	0.408093	0	0.785398	0.917879	0.929661	0.853316
1300	0.408407	0	0.785398	0.917755	0.929776	0.853307
1301	0.408721	0	0.785398	0.91763	0.929892	0.853297
1302	0.409035	0	0.785398	0.917505	0.930008	0.853287
1303	0.40935	0	0.785398	0.91738	0.930123	0.853276
1304	0.409664	0	0.785398	0.917255	0.930238	0.853266
1305	0.409978	0	0.785398	0.91713	0.930354	0.853255
1306	0.410292	0	0.785398	0.917004	0.930469	0.853244
1307	0.410606	0	0.785398	0.916879	0.930584	0.853233
1308	0.41092	0	0.785398	0.916754	0.930699	0.853221
1309	0.411234	0	0.785398	0.916628	0.930814	0.85321
1310	0.411549	0	0.785398	0.916502	0.930928	0.853198
1311	0.411863	0	0.785398	0.916377	0.931043	0.853186
1312	0.412177	0	0.785398	0.916251	0.931158	0.853174
1313	0.412491	0	0.785398	0.916125	0.931272	0.853162
1314	0.412805	0	0.785398	0.915999	0.931387	0.853149
1315	0.413119	0	0.785398	0.915873	0.931501	0.853136
1316	0.413434	0	0.785398	0.915747	0.931615	0.853124
1317	0.413748	0	0.785398	0.91562	0.931729	0.85311
1318	0.414062	0	0.785398	0.915494	0.931843	0.853097
1319	0.414376	0	0.785398	0.915368	0.931957	0.853084
1320	0.41469	0	0.785398	0.915241	0.932071	0.85307
1321	0.415004	0	0.785398	0.915115	0.932185	0.853056
1322	0.415319	0	0.785398	0.914988	0.932299	0.853042
1323	0.415633	0	0.785398	0.914861	0.932412	0.853028
1324	0.415947	0	0.785398	0.914734	0.932526	0.853013
1325	0.416261	0	0.785398	0.914607	0.932639	0.852998
1326	0.416575	0	0.785398	0.91448	0.932752	0.852983
1327	0.416889	0	0.785398	0.914353	0.932866	0.852968
1328	0.417204	0	0.785398	0.914226	0.932979	0.852953
1329	0.417518	0	0.785398	0.914098	0.933092	0.852938
1330	0.417832	0	0.785398	0.913971	0.933205	0.852922
1331	0.418146	0	0.785398	0.913843	0.933317	0.852906
1332	0.41846	0	0.785398	0.913716	0.93343	0.85289
1333	0.418774	0	0.785398	0.913588	0.933543	0.852874
1334	0.419088	0	0.785398	0.91346	0.933655	0.852857
1335	0.419403	0	0.785398	0.913332	0.933768	0.85284
1336	0.419717	0	0.785398	0.913204	0.93388	0.852824
1337	0.420031	0	0.785398	0.913076	0.933993	0.852807
1338	0.420345	0	0.785398	0.912948	0.934105	0.852789
1339	0.420659	0	0.785398	0.91282	0.934217	0.852772
1340	0.420973	0	0.785398	0.912692	0.934329	0.852754
1341	0.421288	0	0.785398	0.912563	0.934441	0.852736
1342	0.421602	0	0.785398	0.912435	0.934553	0.852718
1343	0.421916	0	0.785398	0.912306	0.934664	0.8527
1344	0.42223	0	0.785398	0.912177	0.934776	0.852682
1345	0.422544	0	0.785398	0.912049	0.934888	0.852663
1346	0.422858	0	0.785398	0.91192	0.934999	0.852644
1347	0.423173	0	0.785398	0.911791	0.93511	0.852625
1348	0.423487	0	0.785398	0.911662	0.935222	0.852606
1349	0.423801	0	0.785398	0.911533	0.935333	0.852586
1350	0.424115	0	0.785398	0.911403	0.935444	0.852567
1351	0.424429	0	0.785398	0.911274	0.935555	0.852547
1352	0.424743	0	0.785398	0.911145	0.935666	0.852527
1353	0.425057	0	0.785398	0.911015	0.935777	0.852507
1354	0.425372	0	0.785398	0.910885	0.935887	0.852486
1355	0.425686	0	0.785398	0.910756	0.935998	0.852466
1356	0.426	0	0.785398	0.910626	0.936109	0.852445
1357	0.426314	0	0.785398	0.910496	0.936219	0.852424
1358	0.426628	0	0.785398	0.910366	0.936329	0.852403
1359	0.426942	0	0.785398	0.910236	0.93644	0.852381
1360	0.427257	0	0.785398	0.910106	0.93655	0.85236
1361	0.427571	0	0.785398	0.909976	0.93666	0.852338
1362	0.427885	0	0.785398	0.909845	0.93677	0.852316
1363	0.428199	0	0.785398	0.909715	0.93688	0.852294
1364	0.428513	0	0.785398	0.909585	0.93699	0.852271
1365	0.428827	0	0.785398	0.909454	0.937099	0.852249
1366	0.429142	0	0.785398	0.909323	0.937209	0.852226
1367	0.429456	0	0.785398	0.909193	0.937318	0.852203
1368	0.42977	0	0.785398	0.909062	0.937428	0.85218
1369	0.430084	0	0.785398	0.908931	0.937537	0.852156
1370	0.430398	0	0.785398	0.9088	0.937646	0.852133
1371	0.430712	0	0.785398	0.908669	0.937756	0.852109
1372	0.431027	0	0.785398	0.908537	0.937865	0.852085
1373	0.431341	0	0.785398	0.908406	0.937974	0.852061
1374	0.431655	0	0.785398	0.908275	0.938083	0.852037
1375	0.431969	0	0.785398	0.908143	0.938191	0.852012
1376	0.432283	0	0.785398	0.908012	0.9383	0.851987
1377	0.432597	0	0.785398	0.90788	0.938409	0.851962
1378	0.432911	0	0.785398	0.907748	0.938517	0.851937
1379	0.433226	0	0.785398	0.907616	0.938626	0.851912
1380	0.43354	0	0.785398	0.907484	0.938734	0.851886
1381	0.433854	0	0.785398	0.907352	0.938842	0.851861
1382	0.434168	0	0.785398	0.90722	0.93895	0.851835
1383	0.434482	0	0.785398	0.907088	0.939058	0.851809
1384	0.434796	0	0.785398	0.906956	0.939166	0.851782
1385	0.435111	0	0.785398	0.906823	0.939274	0.851756
1386	0.435425	0	0.785398	0.906691	0.939382	0.851729
1387	0.435739	0	0.785398	0.906558	0.939489	0.851702
1388	0.436053	0	0.785398	0.906426	0.939597	0.851675
1389	0.436367	0	0.785398	0.906293	0.939705	0.851648
1390	0.436681	0	0.785398	0.90616	0.939812	0.85162
1391	0.436996	0	0.785398	0.906027	0.939919	0.851592
1392	0.43731	0	0.785398	0.905894	0.940026	0.851565
1393	0.437624	0	0.785398	0.905761	0.940134	0.851537
1394	0.437938	0	0.785398	0.905628	0.940241	0.851508
1395	0.438252	0	0.785398	0.905495	0.940348	0.85148
1396	0.438566	0	0.785398	0.905361	0.940454	0.851451
1397	0.43888	0	0.785398	0.905228	0.940561	0.851422
1398	0.439195	0	0.785398	0.905094	0.940668	0.851393
1399	0.439509	0	0.785398	0.904961	0.940774	0.851364
1400	0.439823	0	0.785398	0.904827	0.940881	0.851334
1401	0.440137	0	0.785398	0.904693	0.940987	0.851305
1402	0.440451	0	0.785398	0.904559	0.941093	0.851275
1403	0.440765	0	0.785398	0.904425	0.9412	0.851245
1404	0.44108	0	0.785398	0.904291	0.941306	0.851215
1405	0.441394	0	0.785398	0.904157	0.941412	0.851184
1406	0.441708	0	0.785398	0.904023	0.941518	0.851153
1407	0.442022	0	0.785398	0.903889	0.941623	0.851123
1408	0.442336	0	0.785398	0.903754	0.941729	0.851092
1409	0.44265	0	0.785398	0.90362	0.941835	0.85106
1410	0.442965	0	0.785398	0.903485	0.94194	0.851029
1411	0.443279	0	0.785398	0.90335	0.942046	0.850997
1412	0.443593	0	0.785398	0.903215	0.942151	0.850965
1413	0.443907	0	0.785398	0.903081	0.942256	0.850933
1414	0.444221	0	0.785398	0.902946	0.942362	0.850901
1415	0.444535	0	0.785398	0.902811	0.942467	0.850869
1416	0.44485	0	0.785398	0.902675	0.942572	0.850836
1417	0.445164	0	0.785398	0.90254	0.942676	0.850803
1418	0.445478	0	0.785398	0.902405	0.942781	0.85077
1419	0.445792	0	0.785398	0.902269	0.942886	0.850737
1420	0.446106	0	0.785398	0.902134	0.942991	0.850704
1421	0.44642	0	0.785398	0.901998	0.943095	0.85067
1422	0.446734	0	0.785398	0.901863	0.943199	0.850636
1423	0.447049	0	0.785398	0.901727	0.943304	0.850602
1424	0.447363	0	0.785398	0.901591	0.943408	0.850568
1425	0.447677	0	0.785398	0.901455	0.943512	0.850534
1426	0.447991	0	0.785398	0.901319	0.943616	0.850499
1427	0.448305	0	0.785398	0.901183	0.94372	0.850465
1428	0.448619	0	0.785398	0.901047	0.943824	0.85043
1429	0.448934	0	0.785398	0.90091	0.943928	0.850394
1430	0.449248	0	0.785398	0.900774	0.944031	0.850359
1431	0.449562	0	0.785398	0.900638	0.944135	0.850323
1432	0.449876	0	0.785398	0.900501	0.944239	0.850288
1433	0.45019	0	0.785398	0.900364	0.944342	0.850252
1434	0.450504	0	0.785398	0.900228	0.944445	0.850216
1435	0.450819	0	0.785398	0.900091	0.944548	0.850179
1436	0.451133	0	0.785398	0.899954	0.944652	0.850143
1437	0.451447	0	0.785398	0.899817	0.944755	0.850106
1438	0.451761	0	0.785398	0.89968	0.944857	0.850069
1439	0.452075	0	0.785398	0.899543	0.94496	0.850032
1440	0.452389	0	0.785398	0.899405	0.945063	0.849995
1441	0.452704	0	0.785398	0.899268	0.945166	0.849957
1442	0.453018	0	0.785398	0.89913	0.945268	0.849919
1443	0.453332	0	0.785398	0.898993	0.945371	0.849882
1444	0.453646	0	0.785398	0.898855	0.945473	0.849843
1445	0.45396	0	0.785398	0.898718	0.945575	0.849805
1446	0.454274	0	0.785398	0.89858	0.945678	0.849767
1447	0.454588	0	0.785398	0.898442	0.94578	0.849728
1448	0.454903	0	0.785398	0.898304	0.945882	0.849689
1449	0.455217	0	0.785398	0.898166	0.945984	0.84965
1450	0.455531	0	0.785398	0.898028	0.946085	0.849611
1451	0.455845	0	0.785398	0.897889	0.946187	0.849571
1452	0.456159	0	0.785398	0.897751	0.946289	0.849532
1453	0.456473	0	0.785398	0.897613	0.94639	0.849492
1454	0.456788	0	0.785398	0.897474	0.946492	0.849452
1455	0.457102	0	0.785398	0.897335	0.946593	0.849411
1456	0.457416	0	0.785398	0.897197	0.946694	0.849371
1457	0.45773	0	0.785398	0.897058	0.946795	0.84933
1458	0.458044	0	0.785398	0.896919	0.946896	0.849289
1459	0.458358	0	0.785398	0.89678	0.946997	0.849248
1460	0.458673	0	0.785398	0.896641	0.947098	0.849207
1461	0.458987	0	0.785398	0.896502	0.947199	0.849166
1462	0.459301	0	0.785398	0.896363	0.9473	0.849124
1463	0.459615	0	0.785398	0.896223	0.9474	0.849082
1464	0.459929	0	0.785398	0.896084	0.947501	0.84904
1465	0.460243	0	0.785398	0.895944	0.947601	0.848998
1466	0.460557	0	0.785398	0.895805	0.947702	0.848956
1467	0.460872	0	0.785398	0.895665	0.947802	0.848913
1468	0.461186	0	0.785398	0.895525	0.947902	0.84887
1469	0.4615	0	0.785398	0.895386	0.948002	0.848827
1470	0.461814	0	0.785398	0.895246	0.948102	0.848784
1471	0.462128	0	0.785398	0.895106	0.948202	0.848741
1472	0.462442	0	0.785398	0.894966	0.948302	0.848697
1473	0.462757	0	0.785398	0.894825	0.948401	0.848653
1474	0.463071	0	0.785398	0.894685	0.948501	0.848609
1475	0.463385	0	0.785398	0.894545	0.9486	0.848565
1476	0.463699	0	0.785398	0.894404	0.9487	0.848521
1477	0.464013	0	0.785398	0.894264	0.948799	0.848476
1478	0.464327	0	0.785398	0.894123	0.948898	0.848432
1479	0.464642	0	0.785398	0.893982	0.948997	0.848387
1480	0.464956	0	0.785398	0.893841	0.949096	0.848341
1481	0.46527	0	0.785398	0.893701	0.949195	0.848296
1482	0.465584	0	0.785398	0.89356	0.949294	0.848251
1483	0.465898	0	0.785398	0.893418	0.949393	0.848205
1484	0.466212	0	0.785398	0.893277	0.949491	0.848159
1485	0.466527	0	0.785398	0.893136	0.94959	0.848113
1486	0.466841	0	0.785398	0.892995	0.949688	0.848066
1487	0.467155	0	0.785398	0.892853	0.949787	0.84802
1488	0.467469	0	0.785398	0.892712	0.949885	0.847973
1489	0.467783	0	0.785398	0.89257	0.949983	0.847926
1490	0.468097	0	0.785398	0.892428	0.950081	0.847879
1491	0.468411	0	0.785398	0.892287	0.950179	0.847832
1492	0.468726	0	0.785398	0.892145	0.950277	0.847784
1493	0.46904	0	0.785398	0.892003	0.950375	0.847737
1494	0.469354	0	0.785398	0.891861	0.950472	0.847689
1495	0.469668	0	0.785398	0.891719	0.95057	0.847641
1496	0.469982	0	0.785398	0.891576	0.950667	0.847593
1497	0.470296	0	0.785398	0.891434	0.950765	0.847544
1498	0.470611	0	0.785398	0.891292	0.950862	0.847495
1499	0.470925	0	0.785398	0.891149	0.950959	0.847447
1500	0.471239	0	0.785398	0.891007	0.951057	0.847398
1501	0.471553	0	0.785398	0.890864	0.951154	0.847348
1502	0.471867	0	0.785398	0.890721	0.95125	0.847299
1503	0.472181	0	0.785398	0.890578	0.951347	0.847249
1504	0.472496	0	0.785398	0.890435	0.951444	0.847199
1505	0.47281	0	0.785398	0.890292	0.951541	0.847149
1506	0.473124	0	0.785398	0.890149	0.951637	0.847099
1507	0.473438	0	0.785398	0.890006	0.951734	0.847049
1508	0.473752	0	0.785398	0.889863	0.95183	0.846998
1509	0.474066	0	0.785398	0.889719	0.951926	0.846947
1510	0.47438	0	0.785398	0.889576	0.952023	0.846896
1511	0.474695	0	0.785398	0.889432	0.952119	0.846845
1512	0.475009	0	0.785398	0.889289	0.952215	0.846794
1513	0.475323	0	0.785398	0.889145	0.952311	0.846742
1514	0.475637	0	0.785398	0.889001	0.952406	0.84669
1515	0.475951	0	0.785398	0.888857	0.952502	0.846638
1516	0.476265	0	0.785398	0.888713	0.952598	0.846586
1517	0.47658	0	0.785398	0.888569	0.952693	0.846534
1518	0.476894	0	0.785398	0.888425	0.952789	0.846481
1519	0.477208	0	0.785398	0.888281	0.952884	0.846429
1520	0.477522	0	0.785398	0.888136	0.952979	0.846376
1521	0.477836	0	0.785398	0.887992	0.953074	0.846323
1522	0.47815	0	0.785398	0.887848	0.95317	0.846269
1523	0.478465	0	0.785398	0.887703	0.953265	0.846216
1524	0.478779	0	0.785398	0.887558	0.953359	0.846162
1525	0.479093	0	0.785398	0.887413	0.953454	0.846108
1526	0.479407	0	0.785398	0.887269	0.953549	0.846054
1527	0.479721	0	0.785398	0.887124	0.953643	0.846
1528	0.480035	0	0.785398	0.886979	0.953738	0.845945
1529	0.48035	0	0.785398	0.886833	0.953832	0.84589
1530	0.480664	0	0.785398	0.886688	0.953927	0.845836
1531	0.480978	0	0.785398	0.886543	0.954021	0.84578
1532	0.481292	0	0.785398	0.886398	0.954115	0.845725
1533	0.481606	0	0.785398	0.886252	0.954209	0.84567
1534	0.48192	0	0.785398	0.886107	0.954303	0.845614
1535	0.482234	0	0.785398	0.885961	0.954397	0.845558
1536	0.482549	0	0.785398	0.885815	0.954491	0.845502
1537	0.482863	0	0.785398	0.885669	0.954584	0.845446
1538	0.483177	0	0.785398	0.885523	0.954678	0.845389
1539	0.483491	0	0.785398	0.885377	0.954771	0.845333
1540	0.483805	0	0.785398	0.885231	0.954865	0.845276
1541	0.484119	0	0.785398	0.885085	0.954958	0.845219
1542	0.484434	0	0.785398	0.884939	0.955051	0.845162
1543	0.484748	0	0.785398	0.884793	0.955144	0.845104
1544	0.485062	0	0.785398	0.884646	0.955237	0.845047
1545	0.485376	0	0.785398	0.8845	0.95533	0.844989
1546	0.48569	0	0.785398	0.884353	0.955423	0.844931
1547	0.486004	0	0.785398	0.884206	0.955515	0.844873
1548	0.486319	0	0.785398	0.884059	0.955608	0.844814
1549	0.486633	0	0.785398	0.883913	0.955701	0.844756
1550	0.486947	0	0.785398	0.883766	0.955793	0.844697
1551	0.487261	0	0.785398	0.883619	0.955885	0.844638
1552	0.487575	0	0.785398	0.883471	0.955978	0.844579
1553	0.487889	0	0.785398	0.883324	0.95607	0.84452
1554	0.488203	0	0.785398	0.883177	0.956162	0.84446
1555	0.488518	0	0.785398	0.88303	0.956254	0.8444
1556	0.488832	0	0.785398	0.882882	0.956346	0.84434
1557	0.489146	0	0.785398	0.882734	0.956437	0.84428
1558	0.48946	0	0.785398	0.882587	0.956529	0.84422
1559	0.489774	0	0.785398	0.882439	0.956621	0.844159
1560	0.490088	0	0.785398	0.882291	0.956712	0.844099
1561	0.490403	0	0.785398	0.882143	0.956803	0.844038
1562	0.490717	0	0.785398	0.881995	0.956895	0.843977
1563	0.491031	0	0.785398	0.881847	0.956986	0.843915
1564	0.491345	0	0.785398	0.881699	0.957077	0.843854
1565	0.491659	0	0.785398	0.881551	0.957168	0.843792
1566	0.491973	0	0.785398	0.881402	0.957259	0.84373
1567	0.492288	0	0.785398	0.881254	0.95735	0.843668
1568	0.492602	0	0.785398	0.881105	0.95744	0.843606
1569	0.492916	0	0.785398	0.880957	0.957531	0.843544
1570	0.49323	0	0.785398	0.880808	0.957622	0.843481
1571	0.493544	0	0.785398	0.880659	0.957712	0.843418
1572	0.493858	0	0.785398	0.88051	0.957802	0.843355
1573	0.494173	0	0.785398	0.880361	0.957893	0.843292
1574	0.494487	0	0.785398	0.880212	0.957983	0.843228
1575	0.494801	0	0.785398	0.880063	0.958073	0.843165
1576	0.495115	0	0.785398	0.879914	0.958163	0.843101
1577	0.495429	0	0.785398	0.879765	0.958253	0.843037
1578	0.495743	0	0.785398	0.879615	0.958343	0.842973
1579	0.496057	0	0.785398	0.879466	0.958432	0.842908
1580	0.496372	0	0.785398	0.879316	0.958522	0.842844
1581	0.496686	0	0.785398	0.879167	0.958611	0.842779
1582	0.497	0	0.785398	0.879017	0.958701	0.842714
1583	0.497314	0	0.785398	0.878867	0.95879	0.842649
1584	0.497628	0	0.785398	0.878717	0.958879	0.842584
1585	0.497942	0	0.785398	0.878567	0.958968	0.842518
1586	0.498257	0	0.785398	0.878417	0.959057	0.842452
1587	0.498571	0	0.785398	0.878267	0.959146	0.842386
1588	0.498885	0	0.785398	0.878117	0.959235	0.84232
1589	0.499199	0	0.785398	0.877966	0.959324	0.842254
1590	0.499513	0	0.785398	0.877816	0.959412	0.842187
1591	0.499827	0	0.785398	0.877665	0.959501	0.842121
1592	0.500142	0	0.785398	0.877515	0.959589	0.842054
1593	0.500456	0	0.785398	0.877364	0.959678	0.841987
1594	0.50077	0	0.785398	0.877213	0.959766	0.841919
1595	0.501084	0	0.785398	0.877062	0.959854	0.841852
1596	0.501398	0	0.785398	0.876911	0.959942	0.841784
1597	0.501712	0	0.785398	0.87676	0.96003	0.841716
1598	0.502027	0	0.785398	0.876609	0.960118	0.841648
1599	0.502341	0	0.785398	0.876458	0.960206	0.84158
1600	0.502655	0	0.785398	0.876307	0.960294	0.841512
1601	0.502969	0	0.785398	0.876155	0.960381	0.841443
1602	0.503283	0	0.785398	0.876004	0.960469	0.841374
1603	0.503597	0	0.785398	0.875852	0.960556	0.841305
1604	0.503911	0	0.785398	0.875701	0.960644	0.841236
1605	0.504226	0	0.785398	0.875549	0.960731	0.841167
1606	0.50454	0	0.785398	0.875397	0.960818	0.841097
1607	0.504854	0	0.785398	0.875245	0.960905	0.841027
1608	0.505168	0	0.785398	0.875093	0.960992	0.840957
1609	0.505482	0	0.785398	0.874941	0.961079	0.840887
1610	0.505796	0	0.785398	0.874789	0.961165	0.840817
1611	0.506111	0	0.785398	0.874637	0.961252	0.840746
1612	0.506425	0	0.785398	0.874484	0.961339	0.840676
1613	0.506739	0	0.785398	0.874332	0.961425	0.840605
1614	0.507053	0	0.785398	0.874179	0.961511	0.840533
1615	0.507367	0	0.785398	0.874027	0.961598	0.840462
1616	0.507681	0	0.785398	0.873874	0.961684	0.840391
1617	0.507996	0	0.785398	0.873721	0.96177	0.840319
1618	0.50831	0	0.785398	0.873568	0.961856	0.840247
1619	0.508624	0	0.785398	0.873415	0.961942	0.840175
1620	0.508938	0	0.785398	0.873262	0.962028	0.840103
1621	0.509252	0	0.785398	0.873109	0.962113	0.84003
1622	0.509566	0	0.785398	0.872956	0.962199	0.839958
1623	0.50988	0	0.785398	0.872803	0.962284	0.839885
1624	0.510195	0	0.785398	0.872649	0.96237	0.839812
1625	0.510509	0	0.785398	0.872496	0.962455	0.839738
1626	0.510823	0	0.785398	0.872342	0.96254	0.839665
1627	0.511137	0	0.785398	0.872189	0.962626	0.839591
1628	0.511451	0	0.785398	0.872035	0.962711	0.839517
1629	0.511765	0	0.785398	0.871881	0.962796	0.839443
1630	0.51208	0	0.785398	0.871727	0.96288	0.839369
1631	0.512394	0	0.785398	0.871573	0.962965	0.839295
1632	0.512708	0	0.785398	0.871419	0.96305	0.83922
1633	0.513022	0	0.785398	0.871265	0.963134	0.839145
1634	0.513336	0	0.785398	0.871111	0.963219	0.839071
1635	0.51365	0	0.785398	0.870957	0.963303	0.838995
1636	0.513965	0	0.785398	0.870802	0.963388	0.83892
1637	0.514279	0	0.785398	0.870648	0.963472	0.838844
1638	0.514593	0	0.785398	0.870493	0.963556	0.838769
1639	0.514907	0	0.785398	0.870339	0.96364	0.838693
1640	0.515221	0	0.785398	0.870184	0.963724	0.838617
1641	0.515535	0	0.785398	0.870029	0.963807	0.83854
1642	0.51585	0	0.785398	0.869874	0.963891	0.838464
1643	0.516164	0	0.785398	0.869719	0.963975	0.838387
1644	0.516478	0	0.785398	0.869564	0.964058	0.83831
1645	0.516792	0	0.785398	0.869409	0.964142	0.838233
1646	0.517106	0	0.785398	0.869253	0.964225	0.838156
1647	0.51742	0	0.785398	0.869098	0.964308	0.838078
1648	0.517734	0	0.785398	0.868943	0.964391	0.838001
1649	0.518049	0	0.785398	0.868787	0.964474	0.837923
1650	0.518363	0	0.785398	0.868632	0.964557	0.837845
1651	0.518677	0	0.785398	0.868476	0.96464	0.837767
1652	0.518991	0	0.785398	0.86832	0.964723	0.837688
1653	0.519305	0	0.785398	0.868164	0.964806	0.83761
1654	0.519619	0	0.785398	0.868008	0.964888	0.837531
1655	0.519934	0	0.785398	0.867852	0.964971	0.837452
1656	0.520248	0	0.785398	0.867696	0.965053	0.837373
1657	0.520562	0	0.785398	0.86754	0.965135	0.837293
1658	0.520876	0	0.785398	0.867384	0.965218	0.837214
1659	0.52119	0	0.785398	0.867227	0.9653	0.837134
1660	0.521504	0	0.785398	0.867071	0.965382	0.837054
1661	0.521819	0	0.785398	0.866914	0.965464	0.836974
1662	0.522133	0	0.785398	0.866758	0.965545	0.836894
1663	0.522447	0	0.785398	0.866601	0.965627	0.836813
1664	0.522761	0	0.785398	0.866444	0.965709	0.836732
1665	0.523075	0	0.785398	0.866287	0.96579	0.836652
1666	0.523389	0	0.785398	0.86613	0.965872	0.83657
1667	0.523703	0	0.785398	0.865973	0.965953	0.836489
1668	0.524018	0	0.785398	0.865816	0.966034	0.836408
1669	0.524332	0	0.785398	0.865659	0.966115	0.836326
1670	0.524646	0	0.785398	0.865501	0.966196	0.836244
1671	0.52496	0	0.785398	0.865344	0.966277	0.836162
1672	0.525274	0	0.785398	0.865186	0.966358	0.83608
1673	0.525588	0	0.785398	0.865029	0.966439	0.835998
1674	0.525903	0	0.785398	0.864871	0.96652	0.835915
1675	0.526217	0	0.785398	0.864713	0.9666	0.835832
1676	0.526531	0	0.785398	0.864556	0.966681	0.835749
1677	0.526845	0	0.785398	0.864398	0.966761	0.835666
1678	0.527159	0	0.785398	0.86424	0.966841	0.835583
1679	0.527473	0	0.785398	0.864082	0.966921	0.835499
1680	0.527788	0	0.785398	0.863923	0.967001	0.835415
1681	0.528102	0	0.785398	0.863765	0.967081	0.835331
1682	0.528416	0	0.785398	0.863607	0.967161	0.835247
1683	0.52873	0	0.785398	0.863448	0.967241	0.835163
1684	0.529044	0	0.785398	0.86329	0.967321	0.835078
1685	0.529358	0	0.785398	0.863131	0.9674	0.834994
1686	0.529673	0	0.785398	0.862973	0.96748	0.834909
1687	0.529987	0	0.785398	0.862814	0.967559	0.834824
1688	0.530301	0	0.785398	0.862655	0.967639	0.834738
1689	0.530615	0	0.785398	0.862496	0.967718	0.834653
1690	0.530929	0	0.785398	0.862337	0.967797	0.834567
1691	0.531243	0	0.785398	0.862178	0.967876	0.834481
1692	0.531557	0	0.785398	0.862019	0.967955	0.834395
1693	0.531872	0	0.785398	0.861859	0.968034	0.834309
1694	0.532186	0	0.785398	0.8617	0.968113	0.834223
1695	0.5325	0	0.785398	0.861541	0.968191	0.834136
1696	0.532814	0	0.785398	0.861381	0.96827	0.834049
1697	0.533128	0	0.785398	0.861221	0.968348	0.833962
1698	0.533442	0	0.785398	0.861062	0.968427	0.833875
1699	0.533757	0	0.785398	0.860902	0.968505	0.833788
1700	0.534071	0	0.785398	0.860742	0.968583	0.8337
1701	0.534385	0	0.785398	0.860582	0.968661	0.833612
1702	0.534699	0	0.785398	0.860422	0.968739	0.833525
1703	0.535013	0	0.785398	0.860262	0.968817	0.833436
1704	0.535327	0	0.785398	0.860102	0.968895	0.833348
1705	0.535642	0	0.785398	0.859941	0.968973	0.83326
1706	0.535956	0	0.785398	0.859781	0.96905	0.833171
1707	0.53627	0	0.785398	0.859621	0.969128	0.833082
1708	0.536584	0	0.785398	0.85946	0.969205	0.832993
1709	0.536898	0	0.785398	0.859299	0.969282	0.832904
1710	0.537212	0	0.785398	0.859139	0.96936	0.832814
1711	0.537527	0	0.785398	0.858978	0.969437	0.832725
1712	0.537841	0	0.785398	0.858817	0.969514	0.832635
1713	0.538155	0	0.785398	0.858656	0.969591	0.832545
1714	0.538469	0	0.785398	0.858495	0.969668	0.832455
1715	0.538783	0	0.785398	0.858334	0.969744	0.832364
1716	0.539097	0	0.785398	0.858172	0.969821	0.832274
1717	0.539411	0	0.785398	0.858011	0.969898	0.832183
1718	0.539726	0	0.785398	0.85785	0.969974	0.832092
1719	0.54004	0	0.785398	0.857688	0.97005	0.832001
1720	0.540354	0	0.785398	0.857527	0.970127	0.831909
1721	0.540668	0	0.785398	0.857365	0.970203	0.831818
1722	0.540982	0	0.785398	0.857203	0.970279	0.831726
1723	0.541296	0	0.785398	0.857041	0.970355	0.831634
1724	0.541611	0	0.785398	0.85688	0.970431	0.831542
1725	0.541925	0	0.785398	0.856718	0.970506	0.83145
1726	0.542239	0	0.785398	0.856555	0.970582	0.831357
1727	0.542553	0	0.785398	0.856393	0.970658	0.831265
1728	0.542867	0	0.785398	0.856231	0.970733	0.831172
1729	0.543181	0	0.785398	0.856069	0.970809	0.831079
1730	0.543496	0	0.785398	0.855906	0.970884	0.830986
1731	0.54381	0	0.785398	0.855744	0.970959	0.830892
1732	0.544124	0	0.785398	0.855581	0.971034	0.830799
1733	0.544438	0	0.785398	0.855419	0.971109	0.830705
1734	0.544752	0	0.785398	0.855256	0.971184	0.830611
1735	0.545066	0	0.785398	0.855093	0.971259	0.830517
1736	0.54538	0	0.785398	0.85493	0.971334	0.830422
1737	0.545695	0	0.785398	0.854767	0.971408	0.830328
1738	0.546009	0	0.785398	0.854604	0.971483	0.830233
1739	0.546323	0	0.785398	0.854441	0.971557	0.830138
1740	0.546637	0	0.785398	0.854277	0.971632	0.830043
1741	0.546951	0	0.785398	0.854114	0.971706	0.829948
1742	0.547265	0	0.785398	0.853951	0.97178	0.829852
1743	0.54758	0	0.785398	0.853787	0.971854	0.829757
1744	0.547894	0	0.785398	0.853624	0.971928	0.829661
1745	0.548208	0	0.785398	0.85346	0.972002	0.829565
1746	0.548522	0	0.785398	0.853296	0.972076	0.829468
1747	0.548836	0	0.785398	0.853132	0.972149	0.829372
1748	0.54915	0	0.785398	0.852968	0.972223	0.829275
1749	0.549465	0	0.785398	0.852804	0.972297	0.829179
1750	0.549779	0	0.785398	0.85264	0.97237	0.829082
1751	0.550093	0	0.785398	0.852476	0.972443	0.828984
1752	0.550407	0	0.785398	0.852312	0.972516	0.828887
1753	0.550721	0	0.785398	0.852147	0.97259	0.82879
1754	0.551035	0	0.785398	0.851983	0.972663	0.828692
1755	0.55135	0	0.785398	0.851818	0.972735	0.828594
1756	0.551664	0	0.785398	0.851654	0.972808	0.828496
1757	0.551978	0	0.785398	0.851489	0.972881	0.828397
1758	0.552292	0	0.785398	0.851324	0.972954	0.828299
1759	0.552606	0	0.785398	0.851159	0.973026	0.8282
1760	0.55292	0	0.785398	0.850994	0.973099	0.828101
1761	0.553234	0	0.785398	0.850829	0.973171	0.828002
1762	0.553549	0	0.785398	0.850664	0.973243	0.827903
1763	0.553863	0	0.785398	0.850499	0.973315	0.827804
1764	0.554177	0	0.785398	0.850334	0.973387	0.827704
1765	0.554491	0	0.785398	0.850168	0.973459	0.827604
1766	0.554805	0	0.785398	0.850003	0.973531	0.827504
1767	0.555119	0	0.785398	0.849838	0.973603	0.827404
1768	0.555434	0	0.785398	0.849672	0.973674	0.827304
1769	0.555748	0	0.785398	0.849506	0.973746	0.827203
1770	0.556062	0	0.785398	0.84934	0.973817	0.827103
1771	0.556376	0	0.785398	0.849175	0.973889	0.827002
1772	0.55669	0	0.785398	0.849009	0.97396	0.826901
1773	0.557004	0	0.785398	0.848843	0.974031	0.826799
1774	0.557319	0	0.785398	0.848676	0.974102	0.826698
1775	0.557633	0	0.785398	0.84851	0.974173	0.826596
1776	0.557947	0	0.785398	0.848344	0.974244	0.826494
1777	0.558261	0	0.785398	0.848178	0.974315	0.826392
1778	0.558575	0	0.785398	0.848011	0.974386	0.82629
1779	0.558889	0	0.785398	0.847845	0.974456	0.826188
1780	0.559203	0	0.785398	0.847678	0.974527	0.826085
1781	0.559518	0	0.785398	0.847511	0.974597	0.825982
1782	0.559832	0	0.785398	0.847344	0.974668	0.825879
1783	0.560146	0	0.785398	0.847178	0.974738	0.825776
1784	0.56046	0	0.785398	0.847011	0.974808	0.825673
1785	0.560774	0	0.785398	0.846844	0.974878	0.825569
1786	0.561088	0	0.785398	0.846676	0.974948	0.825465
1787	0.561403	0	0.785398	0.846509	0.975018	0.825361
1788	0.561717	0	0.785398	0.846342	0.975087	0.825257
1789	0.562031	0	0.785398	0.846175	0.975157	0.825153
1790	0.562345	0	0.785398	0.846007	0.975227	0.825049
1791	0.562659	0	0.785398	0.84584	0.975296	0.824944
1792	0.562973	0	0.785398	0.845672	0.975365	0.824839
1793	0.563288	0	0.785398	0.845504	0.975435	0.824734
1794	0.563602	0	0.785398	0.845336	0.975504	0.824629
1795	0.563916	0	0.785398	0.845169	0.975573	0.824524
1796	0.56423	0	0.785398	0.845001	0.975642	0.824418
1797	0.564544	0	0.785398	0.844833	0.975711	0.824312
1798	0.564858	0	0.785398	0.844664	0.97578	0.824206
1799	0.565173	0	0.785398	0.844496	0.975848	0.8241
1800	0.565487	0	0.785398	0.844328	0.975917	0.823994
1801	0.565801	0	0.785398	0.84416	0.975985	0.823887
1802	0.566115	0	0.785398	0.843991	0.976054	0.823781
1803	0.566429	0	0.785398	0.843823	0.976122	0.823674
1804	0.566743	0	0.785398	0.843654	0.97619	0.823567
1805	0.567057	0	0.785398	0.843485	0.976258	0.823459
1806	0.567372	0	0.785398	0.843316	0.976326	0.823352
1807	0.567686	0	0.785398	0.843148	0.976394	0.823244
1808	0.568	0	0.785398	0.842979	0.976462	0.823136
1809	0.568314	0	0.785398	0.84281	0.97653	0.823028
1810	0.568628	0	0.785398	0.84264	0.976597	0.82292
1811	0.568942	0	0.785398	0.842471	0.976665	0.822812
1812	0.569257	0	0.785398	0.842302	0.976732	0.822703
1813	0.569571	0	0.785398	0.842133	0.9768	0.822595
1814	0.569885	0	0.785398	0.841963	0.976867	0.822486
1815	0.570199	0	0.785398	0.841794	0.976934	0.822377
1816	0.570513	0	0.785398	0.841624	0.977001	0.822267
1817	0.570827	0	0.785398	0.841454	0.977068	0.822158
1818	0.571142	0	0.785398	0.841284	0.977135	0.822048
1819	0.571456	0	0.785398	0.841115	0.977201	0.821938
1820	0.57177	0	0.785398	0.840945	0.977268	0.821828
1821	0.572084	0	0.785398	0.840775	0.977335	0.821718
1822	0.572398	0	0.785398	0.840604	0.977401	0.821608
1823	0.572712	0	0.785398	0.840434	0.977468	0.821497
1824	0.573027	0	0.785398	0.840264	0.977534	0.821386
1825	0.573341	0	0.785398	0.840094	0.9776	0.821275
1826	0.573655	0	0.785398	0.839923	0.977666	0.821164
1827	0.573969	0	0.785398	0.839753	0.977732	0.821053
1828	0.574283	0	0.785398	0.839582	0.977798	0.820941
1829	0.574597	0	0.785398	0.839411	0.977864	0.82083
1830	0.574911	0	0.785398	0.83924	0.977929	0.820718
1831	0.575226	0	0.785398	0.83907	0.977995	0.820606
1832	0.57554	0	0.785398	0.838899	0.97806	0.820494
1833	0.575854	0	0.785398	0.838728	0.978126	0.820381
1834	0.576168	0	0.785398	0.838556	0.978191	0.820269
1835	0.576482	0	0.785398	0.838385	0.978256	0.820156
1836	0.576796	0	0.785398	0.838214	0.978321	0.820043
1837	0.577111	0	0.785398	0.838043	0.978386	0.81993
1838	0.577425	0	0.785398	0.837871	0.978451	0.819816
1839	0.577739	0	0.785398	0.8377	0.978516	0.819703
1840	0.578053	0	0.785398	0.837528	0.978581	0.819589
1841	0.578367	0	0.785398	0.837356	0.978646	0.819475
1842	0.578681	0	0.785398	0.837185	0.97871	0.819361
1843	0.578996	0	0.785398	0.837013	0.978774	0.819247
1844	0.57931	0	0.785398	0.836841	0.978839	0.819132
1845	0.579624	0	0.785398	0.836669	0.978903	0.819018
1846	0.579938	0	0.785398	0.836497	0.978967	0.818903
1847	0.580252	0	0.785398	0.836324	0.979031	0.818788
1848	0.580566	0	0.785398	0.836152	0.979095	0.818673
1849	0.58088	0	0.785398	0.83598	0.979159	0.818557
1850	0.581195	0	0.785398	0.835807	0.979223	0.818442
1851	0.581509	0	0.785398	0.835635	0.979286	0.818326
1852	0.581823	0	0.785398	0.835462	0.97935	0.81821
1853	0.582137	0	0.785398	0.83529	0.979413	0.818094
1854	0.582451	0	0.785398	0.835117	0.979477	0.817978
1855	0.582765	0	0.785398	0.834944	0.97954	0.817861
1856	0.58308	0	0.785398	0.834771	0.979603	0.817744
1857	0.583394	0	0.785398	0.834598	0.979666	0.817628
1858	0.583708	0	0.785398	0.834425	0.979729	0.817511
1859	0.584022	0	0.785398	0.834252	0.979792	0.817393
1860	0.584336	0	0.785398	0.834078	0.979855	0.817276
1861	0.58465	0	0.785398	0.833905	0.979918	0.817158
1862	0.584965	0	0.785398	0.833732	0.97998	0.817041
1863	0.585279	0	0.785398	0.833558	0.980043	0.816923
1864	0.585593	0	0.785398	0.833385	0.980105	0.816805
1865	0.585907	0	0.785398	0.833211	0.980168	0.816686
1866	0.586221	0	0.785398	0.833037	0.98023	0.816568
1867	0.586535	0	0.785398	0.832863	0.980292	0.816449
1868	0.58685	0	0.785398	0.832689	0.980354	0.81633
1869	0.587164	0	0.785398	0.832515	0.980416	0.816211
1870	0.587478	0	0.785398	0.832341	0.980478	0.816092
1871	0.587792	0	0.785398	0.832167	0.980539	0.815973
1872	0.588106	0	0.785398	0.831993	0.980601	0.815853
1873	0.58842	0	0.785398	0.831819	0.980663	0.815733
1874	0.588734	0	0.785398	0.831644	0.980724	0.815613
1875	0.589049	0	0.785398	0.83147	0.980785	0.815493
1876	0.589363	0	0.785398	0.831295	0.980847	0.815373
1877	0.589677	0	0.785398	0.83112	0.980908	0.815252
1878	0.589991	0	0.785398	0.830946	0.980969	0.815132
1879	0.590305	0	0.785398	0.830771	0.98103	0.815011
1880	0.590619	0	0.785398	0.830596	0.981091	0.81489
1881	0.590934	0	0.785398	0.830421	0.981151	0.814769
1882	0.591248	0	0.785398	0.830246	0.981212	0.814647
1883	0.591562	0	0.785398	0.830071	0.981272	0.814526
1884	0.591876	0	0.785398	0.829895	0.981333	0.814404
1885	0.59219	0	0.785398	0.82972	0.981393	0.814282
1886	0.592504	0	0.785398	0.829545	0.981454	0.81416
1887	0.592819	0	0.785398	0.829369	0.981514	0.814037
1888	0.593133	0	0.785398	0.829194	0.981574	0.813915
1889	0.593447	0	0.785398	0.829018	0.981634	0.813792
1890	0.593761	0	0.785398	0.828842	0.981694	0.813669
1891	0.594075	0	0.785398	0.828667	0.981754	0.813546
1892	0.594389	0	0.785398	0.828491	0.981813	0.813423
1893	0.594703	0	0.785398	0.828315	0.981873	0.8133
1894	0.595018	0	0.785398	0.828139	0.981932	0.813176
1895	0.595332	0	0.785398	0.827962	0.981992	0.813052
1896	0.595646	0	0.785398	0.827786	0.982051	0.812928
1897	0.59596	0	0.785398	0.82761	0.98211	0.812804
1898	0.596274	0	0.785398	0.827434	0.982169	0.81268
1899	0.596588	0	0.785398	0.827257	0.982228	0.812555
1900	0.596903	0	0.785398	0.827081	0.982287	0.812431
1901	0.597217	0	0.785398	0.826904	0.982346	0.812306
1902	0.597531	0	0.785398	0.826727	0.982405	0.812181
1903	0.597845	0	0.785398	0.82655	0.982463	0.812056
1904	0.598159	0	0.785398	0.826374	0.982522	0.81193
1905	0.598473	0	0.785398	0.826197	0.98258	0.811805
1906	0.598788	0	0.785398	0.82602	0.982639	0.811679
1907	0.599102	0	0.785398	0.825842	0.982697	0.811553
1908	0.599416	0	0.785398	0.825665	0.982755	0.811427
1909	0.59973	0	0.785398	0.825488	0.982813	0.8113
1910	0.600044	0	0.785398	0.825311	0.982871	0.811174
1911	0.600358	0	0.785398	0.825133	0.982929	0.811047
1912	0.600673	0	0.785398	0.824956	0.982987	0.81092
1913	0.600987	0	0.785398	0.824778	0.983044	0.810793
1914	0.601301	0	0.785398	0.8246	0.983102	0.810666
1915	0.601615	0	0.785398	0.824423	0.983159	0.810539
1916	0.601929	0	0.785398	0.824245	0.983217	0.810411
1917	0.602243	0	0.785398	0.824067	0.983274	0.810284
1918	0.602557	0	0.785398	0.823889	0.983331	0.810156
1919	0.602872	0	0.785398	0.823711	0.983388	0.810027
1920	0.603186	0	0.785398	0.823533	0.983445	0.809899
1921	0.6035	0	0.785398	0.823354	0.983502	0.809771
1922	0.603814	0	0.785398	0.823176	0.983559	0.809642
1923	0.604128	0	0.785398	0.822998	0.983616	0.809513
1924	0.604442	0	0.785398	0.822819	0.983672	0.809384
1925	0.604757	0	0.785398	0.822641	0.983729	0.809255
1926	0.605071	0	0.785398	0.822462	0.983785	0.809126
1927	0.605385	0	0.785398	0.822283	0.983841	0.808996
1928	0.605699	0	0.785398	0.822104	0.983898	0.808866
1929	0.606013	0	0.785398	0.821925	0.983954	0.808736
1930	0.606327	0	0.785398	0.821746	0.98401	0.808606
1931	0.606642	0	0.785398	0.821567	0.984066	0.808476
1932	0.606956	0	0.785398	0.821388	0.984121	0.808346
1933	0.60727	0	0.785398	0.821209	0.984177	0.808215
1934	0.607584	0	0.785398	0.82103	0.984233	0.808084
1935	0.607898	0	0.785398	0.82085	0.984288	0.807953
1936	0.608212	0	0.785398	0.820671	0.984344	0.807822
1937	0.608526	0	0.785398	0.820491	0.984399	0.807691
1938	0.608841	0	0.785398	0.820312	0.984454	0.807559
1939	0.609155	0	0.785398	0.820132	0.984509	0.807427
1940	0.609469	0	0.785398	0.819952	0.984564	0.807296
1941	0.609783	0	0.785398	0.819772	0.984619	0.807164
1942	0.610097	0	0.785398	0.819592	0.984674	0.807031
1943	0.610411	0	0.785398	0.819412	0.984729	0.806899
1944	0.610726	0	0.785398	0.819232	0.984783	0.806766
1945	0.61104	0	0.785398	0.819052	0.984838	0.806633
1946	0.611354	0	0.785398	0.818872	0.984892	0.806501
1947	0.611668	0	0.785398	0.818691	0.984947	0.806367
1948	0.611982	0	0.785398	0.818511	0.985001	0.806234
1949	0.612296	0	0.785398	0.81833	0.985055	0.806101
1950	0.612611	0	0.785398	0.81815	0.985109	0.805967
1951	0.612925	0	0.785398	0.817969	0.985163	0.805833
1952	0.613239	0	0.785398	0.817788	0.985217	0.805699
1953	0.613553	0	0.785398	0.817607	0.985271	0.805565
1954	0.613867	0	0.785398	0.817426	0.985325	0.80543
1955	0.614181	0	0.785398	0.817245	0.985378	0.805296
1956	0.614496	0	0.785398	0.817064	0.985432	0.805161
1957	0.61481	0	0.785398	0.816883	0.985485	0.805026
1958	0.615124	0	0.785398	0.816702	0.985538	0.804891
1959	0.615438	0	0.785398	0.816521	0.985592	0.804756
1960	0.615752	0	0.785398	0.816339	0.985645	0.80462
1961	0.616066	0	0.785398	0.816158	0.985698	0.804485
1962	0.61638	0	0.785398	0.815976	0.98575	0.804349
1963	0.616695	0	0.785398	0.815795	0.985803	0.804213
1964	0.617009	0	0.785398	0.815613	0.985856	0.804077
1965	0.617323	0	0.785398	0.815431	0.985909	0.80394
1966	0.617637	0	0.785398	0.815249	0.985961	0.803804
1967	0.617951	0	0.785398	0.815067	0.986013	0.803667
1968	0.618265	0	0.785398	0.814885	0.986066	0.80353
1969	0.61858	0	0.785398	0.814703	0.986118	0.803393
1970	0.618894	0	0.785398	0.814521	0.98617	0.803256
1971	0.619208	0	0.785398	0.814338	0.986222	0.803119
1972	0.619522	0	0.785398	0.814156	0.986274	0.802981
1973	0.619836	0	0.785398	0.813974	0.986326	0.802843
1974	0.62015	0	0.785398	0.813791	0.986378	0.802705
1975	0.620465	0	0.785398	0.813608	0.986429	0.802567
1976	0.620779	0	0.785398	0.813426	0.986481	0.802429
1977	0.621093	0	0.785398	0.813243	0.986532	0.80229
1978	0.621407	0	0.785398	0.81306	0.986584	0.802152
1979	0.621721	0	0.785398	0.812877	0.986635	0.802013
1980	0.622035	0	0.785398	0.812694	0.986686	0.801874
1981	0.62235	0	0.785398	0.812511	0.986737	0.801735
1982	0.622664	0	0.785398	0.812328	0.986788	0.801595
1983	0.622978	0	0.785398	0.812145	0.986839	0.801456
1984	0.623292	0	0.785398	0.811961	0.98689	0.801316
1985	0.623606	0	0.785398	0.811778	0.98694	0.801176
1986	0.62392	0	0.785398	0.811594	0.986991	0.801036
1987	0.624234	0	0.785398	0.811411	0.987041	0.800896
1988	0.624549	0	0.785398	0.811227	0.987092	0.800755
1989	0.624863	0	0.785398	0.811043	0.987142	0.800615
1990	0.625177	0	0.785398	0.81086	0.987192	0.800474
1991	0.625491	0	0.785398	0.810676	0.987242	0.800333
1992	0.625805	0	0.785398	0.810492	0.987292	0.800192
1993	0.626119	0	0.785398	0.810308	0.987342	0.800051
1994	0.626434	0	0.785398	0.810124	0.987392	0.799909
1995	0.626748	0	0.785398	0.809939	0.987441	0.799768
1996	0.627062	0	0.785398	0.809755	0.987491	0.799626
1997	0.627376	0	0.785398	0.809571	0.98754	0.799484
1998	0.62769	0	0.785398	0.809386	0.98759	0.799342
[truncated: 8,004 more rows]

## Sheet: 0-67.5
Step(i)	Time/Angle(θ)	Setting(a=0)	Setting(b=67.5)	EAlice	Ebob	Joint intensity
0	0	0	2.35619	1	-0.707107	-0.707107
1	0.000314159	0	2.35619	1	-0.706885	-0.706885
2	0.000628319	0	2.35619	1	-0.706662	-0.706662
3	0.000942478	0	2.35619	1	-0.70644	-0.70644
4	0.00125664	0	2.35619	0.999999	-0.706218	-0.706217
5	0.0015708	0	2.35619	0.999999	-0.705995	-0.705994
6	0.00188496	0	2.35619	0.999998	-0.705773	-0.705771
7	0.00219911	0	2.35619	0.999998	-0.70555	-0.705548
8	0.00251327	0	2.35619	0.999997	-0.705327	-0.705325
9	0.00282743	0	2.35619	0.999996	-0.705105	-0.705102
10	0.00314159	0	2.35619	0.999995	-0.704882	-0.704878
11	0.00345575	0	2.35619	0.999994	-0.704659	-0.704655
12	0.00376991	0	2.35619	0.999993	-0.704436	-0.704431
13	0.00408407	0	2.35619	0.999992	-0.704213	-0.704207
14	0.00439823	0	2.35619	0.99999	-0.70399	-0.703983
15	0.00471239	0	2.35619	0.999989	-0.703767	-0.703759
16	0.00502655	0	2.35619	0.999987	-0.703544	-0.703535
17	0.00534071	0	2.35619	0.999986	-0.70332	-0.70331
18	0.00565487	0	2.35619	0.999984	-0.703097	-0.703086
19	0.00596903	0	2.35619	0.999982	-0.702873	-0.702861
20	0.00628319	0	2.35619	0.99998	-0.70265	-0.702636
21	0.00659734	0	2.35619	0.999978	-0.702426	-0.702411
22	0.0069115	0	2.35619	0.999976	-0.702203	-0.702186
23	0.00722566	0	2.35619	0.999974	-0.701979	-0.701961
24	0.00753982	0	2.35619	0.999972	-0.701755	-0.701735
25	0.00785398	0	2.35619	0.999969	-0.701531	-0.70151
26	0.00816814	0	2.35619	0.999967	-0.701308	-0.701284
27	0.0084823	0	2.35619	0.999964	-0.701084	-0.701058
28	0.00879646	0	2.35619	0.999961	-0.700859	-0.700832
29	0.00911062	0	2.35619	0.999958	-0.700635	-0.700606
30	0.00942478	0	2.35619	0.999956	-0.700411	-0.70038
31	0.00973894	0	2.35619	0.999953	-0.700187	-0.700154
32	0.0100531	0	2.35619	0.999949	-0.699963	-0.699927
33	0.0103673	0	2.35619	0.999946	-0.699738	-0.699701
34	0.0106814	0	2.35619	0.999943	-0.699514	-0.699474
35	0.0109956	0	2.35619	0.99994	-0.699289	-0.699247
36	0.0113097	0	2.35619	0.999936	-0.699065	-0.69902
37	0.0116239	0	2.35619	0.999932	-0.69884	-0.698793
38	0.0119381	0	2.35619	0.999929	-0.698615	-0.698565
39	0.0122522	0	2.35619	0.999925	-0.69839	-0.698338
40	0.0125664	0	2.35619	0.999921	-0.698165	-0.69811
41	0.0128805	0	2.35619	0.999917	-0.69794	-0.697883
42	0.0131947	0	2.35619	0.999913	-0.697715	-0.697655
43	0.0135088	0	2.35619	0.999909	-0.69749	-0.697427
44	0.013823	0	2.35619	0.999904	-0.697265	-0.697199
45	0.0141372	0	2.35619	0.9999	-0.69704	-0.69697
46	0.0144513	0	2.35619	0.999896	-0.696815	-0.696742
47	0.0147655	0	2.35619	0.999891	-0.696589	-0.696513
48	0.0150796	0	2.35619	0.999886	-0.696364	-0.696285
49	0.0153938	0	2.35619	0.999882	-0.696138	-0.696056
50	0.015708	0	2.35619	0.999877	-0.695913	-0.695827
51	0.0160221	0	2.35619	0.999872	-0.695687	-0.695598
52	0.0163363	0	2.35619	0.999867	-0.695461	-0.695369
53	0.0166504	0	2.35619	0.999861	-0.695236	-0.695139
54	0.0169646	0	2.35619	0.999856	-0.69501	-0.69491
55	0.0172788	0	2.35619	0.999851	-0.694784	-0.69468
56	0.0175929	0	2.35619	0.999845	-0.694558	-0.69445
57	0.0179071	0	2.35619	0.99984	-0.694332	-0.694221
58	0.0182212	0	2.35619	0.999834	-0.694106	-0.693991
59	0.0185354	0	2.35619	0.999828	-0.69388	-0.69376
60	0.0188496	0	2.35619	0.999822	-0.693653	-0.69353
61	0.0191637	0	2.35619	0.999816	-0.693427	-0.6933
62	0.0194779	0	2.35619	0.99981	-0.693201	-0.693069
63	0.019792	0	2.35619	0.999804	-0.692974	-0.692838
64	0.0201062	0	2.35619	0.999798	-0.692748	-0.692608
65	0.0204204	0	2.35619	0.999792	-0.692521	-0.692377
66	0.0207345	0	2.35619	0.999785	-0.692294	-0.692146
67	0.0210487	0	2.35619	0.999778	-0.692068	-0.691914
68	0.0213628	0	2.35619	0.999772	-0.691841	-0.691683
69	0.021677	0	2.35619	0.999765	-0.691614	-0.691451
70	0.0219911	0	2.35619	0.999758	-0.691387	-0.69122
71	0.0223053	0	2.35619	0.999751	-0.69116	-0.690988
72	0.0226195	0	2.35619	0.999744	-0.690933	-0.690756
73	0.0229336	0	2.35619	0.999737	-0.690706	-0.690524
74	0.0232478	0	2.35619	0.99973	-0.690479	-0.690292
75	0.0235619	0	2.35619	0.999722	-0.690251	-0.69006
76	0.0238761	0	2.35619	0.999715	-0.690024	-0.689827
77	0.0241903	0	2.35619	0.999707	-0.689796	-0.689595
78	0.0245044	0	2.35619	0.9997	-0.689569	-0.689362
79	0.0248186	0	2.35619	0.999692	-0.689341	-0.689129
80	0.0251327	0	2.35619	0.999684	-0.689114	-0.688896
81	0.0254469	0	2.35619	0.999676	-0.688886	-0.688663
82	0.0257611	0	2.35619	0.999668	-0.688658	-0.68843
83	0.0260752	0	2.35619	0.99966	-0.688431	-0.688197
84	0.0263894	0	2.35619	0.999652	-0.688203	-0.687963
85	0.0267035	0	2.35619	0.999643	-0.687975	-0.687729
86	0.0270177	0	2.35619	0.999635	-0.687747	-0.687496
87	0.0273319	0	2.35619	0.999627	-0.687519	-0.687262
88	0.027646	0	2.35619	0.999618	-0.68729	-0.687028
89	0.0279602	0	2.35619	0.999609	-0.687062	-0.686794
90	0.0282743	0	2.35619	0.9996	-0.686834	-0.686559
91	0.0285885	0	2.35619	0.999591	-0.686605	-0.686325
92	0.0289027	0	2.35619	0.999582	-0.686377	-0.68609
93	0.0292168	0	2.35619	0.999573	-0.686149	-0.685856
94	0.029531	0	2.35619	0.999564	-0.68592	-0.685621
95	0.0298451	0	2.35619	0.999555	-0.685691	-0.685386
96	0.0301593	0	2.35619	0.999545	-0.685463	-0.685151
97	0.0304734	0	2.35619	0.999536	-0.685234	-0.684916
98	0.0307876	0	2.35619	0.999526	-0.685005	-0.68468
99	0.0311018	0	2.35619	0.999516	-0.684776	-0.684445
100	0.0314159	0	2.35619	0.999507	-0.684547	-0.684209
101	0.0317301	0	2.35619	0.999497	-0.684318	-0.683974
102	0.0320442	0	2.35619	0.999487	-0.684089	-0.683738
103	0.0323584	0	2.35619	0.999477	-0.68386	-0.683502
104	0.0326726	0	2.35619	0.999466	-0.683631	-0.683266
105	0.0329867	0	2.35619	0.999456	-0.683401	-0.683029
106	0.0333009	0	2.35619	0.999446	-0.683172	-0.682793
107	0.033615	0	2.35619	0.999435	-0.682942	-0.682557
108	0.0339292	0	2.35619	0.999424	-0.682713	-0.68232
109	0.0342434	0	2.35619	0.999414	-0.682483	-0.682083
110	0.0345575	0	2.35619	0.999403	-0.682254	-0.681846
111	0.0348717	0	2.35619	0.999392	-0.682024	-0.681609
112	0.0351858	0	2.35619	0.999381	-0.681794	-0.681372
113	0.0355	0	2.35619	0.99937	-0.681564	-0.681135
114	0.0358142	0	2.35619	0.999359	-0.681334	-0.680897
115	0.0361283	0	2.35619	0.999347	-0.681104	-0.68066
116	0.0364425	0	2.35619	0.999336	-0.680874	-0.680422
117	0.0367566	0	2.35619	0.999325	-0.680644	-0.680184
118	0.0370708	0	2.35619	0.999313	-0.680414	-0.679946
119	0.037385	0	2.35619	0.999301	-0.680184	-0.679708
120	0.0376991	0	2.35619	0.999289	-0.679953	-0.67947
121	0.0380133	0	2.35619	0.999278	-0.679723	-0.679232
122	0.0383274	0	2.35619	0.999266	-0.679493	-0.678994
123	0.0386416	0	2.35619	0.999254	-0.679262	-0.678755
124	0.0389557	0	2.35619	0.999241	-0.679031	-0.678516
125	0.0392699	0	2.35619	0.999229	-0.678801	-0.678277
126	0.0395841	0	2.35619	0.999217	-0.67857	-0.678038
127	0.0398982	0	2.35619	0.999204	-0.678339	-0.677799
128	0.0402124	0	2.35619	0.999192	-0.678108	-0.67756
129	0.0405265	0	2.35619	0.999179	-0.677877	-0.677321
130	0.0408407	0	2.35619	0.999166	-0.677646	-0.677081
131	0.0411549	0	2.35619	0.999153	-0.677415	-0.676842
132	0.041469	0	2.35619	0.99914	-0.677184	-0.676602
133	0.0417832	0	2.35619	0.999127	-0.676953	-0.676362
134	0.0420973	0	2.35619	0.999114	-0.676722	-0.676122
135	0.0424115	0	2.35619	0.999101	-0.67649	-0.675882
136	0.0427257	0	2.35619	0.999087	-0.676259	-0.675642
137	0.0430398	0	2.35619	0.999074	-0.676028	-0.675402
138	0.043354	0	2.35619	0.99906	-0.675796	-0.675161
139	0.0436681	0	2.35619	0.999047	-0.675564	-0.67492
140	0.0439823	0	2.35619	0.999033	-0.675333	-0.67468
141	0.0442965	0	2.35619	0.999019	-0.675101	-0.674439
142	0.0446106	0	2.35619	0.999005	-0.674869	-0.674198
143	0.0449248	0	2.35619	0.998991	-0.674637	-0.673957
144	0.0452389	0	2.35619	0.998977	-0.674405	-0.673716
145	0.0455531	0	2.35619	0.998963	-0.674173	-0.673474
146	0.0458673	0	2.35619	0.998948	-0.673941	-0.673233
147	0.0461814	0	2.35619	0.998934	-0.673709	-0.672991
148	0.0464956	0	2.35619	0.998919	-0.673477	-0.672749
149	0.0468097	0	2.35619	0.998905	-0.673245	-0.672507
150	0.0471239	0	2.35619	0.99889	-0.673013	-0.672265
151	0.047438	0	2.35619	0.998875	-0.67278	-0.672023
152	0.0477522	0	2.35619	0.99886	-0.672548	-0.671781
153	0.0480664	0	2.35619	0.998845	-0.672315	-0.671539
154	0.0483805	0	2.35619	0.99883	-0.672083	-0.671296
155	0.0486947	0	2.35619	0.998815	-0.67185	-0.671053
156	0.0490088	0	2.35619	0.998799	-0.671617	-0.670811
157	0.049323	0	2.35619	0.998784	-0.671384	-0.670568
158	0.0496372	0	2.35619	0.998768	-0.671151	-0.670325
159	0.0499513	0	2.35619	0.998753	-0.670919	-0.670082
160	0.0502655	0	2.35619	0.998737	-0.670686	-0.669838
161	0.0505796	0	2.35619	0.998721	-0.670453	-0.669595
162	0.0508938	0	2.35619	0.998705	-0.670219	-0.669352
163	0.051208	0	2.35619	0.998689	-0.669986	-0.669108
164	0.0515221	0	2.35619	0.998673	-0.669753	-0.668864
165	0.0518363	0	2.35619	0.998657	-0.66952	-0.66862
166	0.0521504	0	2.35619	0.99864	-0.669286	-0.668376
167	0.0524646	0	2.35619	0.998624	-0.669053	-0.668132
168	0.0527788	0	2.35619	0.998608	-0.668819	-0.667888
169	0.0530929	0	2.35619	0.998591	-0.668586	-0.667644
170	0.0534071	0	2.35619	0.998574	-0.668352	-0.667399
171	0.0537212	0	2.35619	0.998557	-0.668118	-0.667154
172	0.0540354	0	2.35619	0.99854	-0.667885	-0.66691
173	0.0543496	0	2.35619	0.998523	-0.667651	-0.666665
174	0.0546637	0	2.35619	0.998506	-0.667417	-0.66642
175	0.0549779	0	2.35619	0.998489	-0.667183	-0.666175
176	0.055292	0	2.35619	0.998472	-0.666949	-0.665929
177	0.0556062	0	2.35619	0.998454	-0.666715	-0.665684
178	0.0559203	0	2.35619	0.998437	-0.66648	-0.665439
179	0.0562345	0	2.35619	0.998419	-0.666246	-0.665193
180	0.0565487	0	2.35619	0.998402	-0.666012	-0.664947
181	0.0568628	0	2.35619	0.998384	-0.665777	-0.664701
182	0.057177	0	2.35619	0.998366	-0.665543	-0.664455
183	0.0574911	0	2.35619	0.998348	-0.665309	-0.664209
184	0.0578053	0	2.35619	0.99833	-0.665074	-0.663963
185	0.0581195	0	2.35619	0.998312	-0.664839	-0.663717
186	0.0584336	0	2.35619	0.998293	-0.664605	-0.66347
187	0.0587478	0	2.35619	0.998275	-0.66437	-0.663224
188	0.0590619	0	2.35619	0.998256	-0.664135	-0.662977
189	0.0593761	0	2.35619	0.998238	-0.6639	-0.66273
190	0.0596903	0	2.35619	0.998219	-0.663665	-0.662483
191	0.0600044	0	2.35619	0.9982	-0.66343	-0.662236
192	0.0603186	0	2.35619	0.998181	-0.663195	-0.661989
193	0.0606327	0	2.35619	0.998162	-0.66296	-0.661742
194	0.0609469	0	2.35619	0.998143	-0.662725	-0.661494
195	0.0612611	0	2.35619	0.998124	-0.662489	-0.661247
196	0.0615752	0	2.35619	0.998105	-0.662254	-0.660999
197	0.0618894	0	2.35619	0.998085	-0.662019	-0.660751
198	0.0622035	0	2.35619	0.998066	-0.661783	-0.660503
199	0.0625177	0	2.35619	0.998046	-0.661547	-0.660255
200	0.0628319	0	2.35619	0.998027	-0.661312	-0.660007
201	0.063146	0	2.35619	0.998007	-0.661076	-0.659759
202	0.0634602	0	2.35619	0.997987	-0.66084	-0.65951
203	0.0637743	0	2.35619	0.997967	-0.660605	-0.659262
204	0.0640885	0	2.35619	0.997947	-0.660369	-0.659013
205	0.0644026	0	2.35619	0.997927	-0.660133	-0.658764
206	0.0647168	0	2.35619	0.997907	-0.659897	-0.658515
207	0.065031	0	2.35619	0.997886	-0.659661	-0.658266
208	0.0653451	0	2.35619	0.997866	-0.659425	-0.658017
209	0.0656593	0	2.35619	0.997845	-0.659188	-0.657768
210	0.0659734	0	2.35619	0.997825	-0.658952	-0.657519
211	0.0662876	0	2.35619	0.997804	-0.658716	-0.657269
212	0.0666018	0	2.35619	0.997783	-0.658479	-0.657019
213	0.0669159	0	2.35619	0.997762	-0.658243	-0.65677
214	0.0672301	0	2.35619	0.997741	-0.658006	-0.65652
215	0.0675442	0	2.35619	0.99772	-0.65777	-0.65627
216	0.0678584	0	2.35619	0.997699	-0.657533	-0.65602
217	0.0681726	0	2.35619	0.997677	-0.657296	-0.65577
218	0.0684867	0	2.35619	0.997656	-0.65706	-0.655519
219	0.0688009	0	2.35619	0.997634	-0.656823	-0.655269
220	0.069115	0	2.35619	0.997613	-0.656586	-0.655018
221	0.0694292	0	2.35619	0.997591	-0.656349	-0.654767
222	0.0697434	0	2.35619	0.997569	-0.656112	-0.654517
223	0.0700575	0	2.35619	0.997547	-0.655875	-0.654266
224	0.0703717	0	2.35619	0.997525	-0.655637	-0.654015
225	0.0706858	0	2.35619	0.997503	-0.6554	-0.653764
226	0.071	0	2.35619	0.997481	-0.655163	-0.653512
227	0.0713142	0	2.35619	0.997458	-0.654925	-0.653261
228	0.0716283	0	2.35619	0.997436	-0.654688	-0.653009
229	0.0719425	0	2.35619	0.997413	-0.654451	-0.652758
230	0.0722566	0	2.35619	0.997391	-0.654213	-0.652506
231	0.0725708	0	2.35619	0.997368	-0.653975	-0.652254
232	0.0728849	0	2.35619	0.997345	-0.653738	-0.652002
233	0.0731991	0	2.35619	0.997322	-0.6535	-0.65175
234	0.0735133	0	2.35619	0.997299	-0.653262	-0.651498
235	0.0738274	0	2.35619	0.997276	-0.653024	-0.651245
236	0.0741416	0	2.35619	0.997253	-0.652786	-0.650993
237	0.0744557	0	2.35619	0.997229	-0.652548	-0.65074
238	0.0747699	0	2.35619	0.997206	-0.65231	-0.650488
239	0.0750841	0	2.35619	0.997183	-0.652072	-0.650235
240	0.0753982	0	2.35619	0.997159	-0.651834	-0.649982
241	0.0757124	0	2.35619	0.997135	-0.651595	-0.649729
242	0.0760265	0	2.35619	0.997111	-0.651357	-0.649476
243	0.0763407	0	2.35619	0.997087	-0.651119	-0.649222
244	0.0766549	0	2.35619	0.997063	-0.65088	-0.648969
245	0.076969	0	2.35619	0.997039	-0.650642	-0.648715
246	0.0772832	0	2.35619	0.997015	-0.650403	-0.648462
247	0.0775973	0	2.35619	0.996991	-0.650164	-0.648208
248	0.0779115	0	2.35619	0.996966	-0.649926	-0.647954
249	0.0782257	0	2.35619	0.996942	-0.649687	-0.6477
250	0.0785398	0	2.35619	0.996917	-0.649448	-0.647446
251	0.078854	0	2.35619	0.996893	-0.649209	-0.647192
252	0.0791681	0	2.35619	0.996868	-0.64897	-0.646937
253	0.0794823	0	2.35619	0.996843	-0.648731	-0.646683
254	0.0797965	0	2.35619	0.996818	-0.648492	-0.646428
255	0.0801106	0	2.35619	0.996793	-0.648253	-0.646174
256	0.0804248	0	2.35619	0.996768	-0.648014	-0.645919
257	0.0807389	0	2.35619	0.996742	-0.647774	-0.645664
258	0.0810531	0	2.35619	0.996717	-0.647535	-0.645409
259	0.0813672	0	2.35619	0.996692	-0.647295	-0.645154
260	0.0816814	0	2.35619	0.996666	-0.647056	-0.644899
261	0.0819956	0	2.35619	0.99664	-0.646816	-0.644643
262	0.0823097	0	2.35619	0.996614	-0.646577	-0.644388
263	0.0826239	0	2.35619	0.996589	-0.646337	-0.644132
264	0.082938	0	2.35619	0.996563	-0.646097	-0.643876
265	0.0832522	0	2.35619	0.996537	-0.645858	-0.643621
266	0.0835664	0	2.35619	0.99651	-0.645618	-0.643365
267	0.0838805	0	2.35619	0.996484	-0.645378	-0.643109
268	0.0841947	0	2.35619	0.996458	-0.645138	-0.642852
269	0.0845088	0	2.35619	0.996431	-0.644898	-0.642596
270	0.084823	0	2.35619	0.996405	-0.644657	-0.64234
271	0.0851372	0	2.35619	0.996378	-0.644417	-0.642083
272	0.0854513	0	2.35619	0.996351	-0.644177	-0.641827
273	0.0857655	0	2.35619	0.996324	-0.643937	-0.64157
274	0.0860796	0	2.35619	0.996297	-0.643696	-0.641313
275	0.0863938	0	2.35619	0.99627	-0.643456	-0.641056
276	0.086708	0	2.35619	0.996243	-0.643215	-0.640799
277	0.0870221	0	2.35619	0.996216	-0.642975	-0.640542
278	0.0873363	0	2.35619	0.996189	-0.642734	-0.640284
279	0.0876504	0	2.35619	0.996161	-0.642493	-0.640027
280	0.0879646	0	2.35619	0.996134	-0.642253	-0.639769
281	0.0882788	0	2.35619	0.996106	-0.642012	-0.639512
282	0.0885929	0	2.35619	0.996078	-0.641771	-0.639254
283	0.0889071	0	2.35619	0.99605	-0.64153	-0.638996
284	0.0892212	0	2.35619	0.996022	-0.641289	-0.638738
285	0.0895354	0	2.35619	0.995994	-0.641048	-0.63848
286	0.0898495	0	2.35619	0.995966	-0.640807	-0.638222
287	0.0901637	0	2.35619	0.995938	-0.640565	-0.637964
288	0.0904779	0	2.35619	0.99591	-0.640324	-0.637705
289	0.090792	0	2.35619	0.995881	-0.640083	-0.637447
290	0.0911062	0	2.35619	0.995853	-0.639841	-0.637188
291	0.0914203	0	2.35619	0.995824	-0.6396	-0.636929
292	0.0917345	0	2.35619	0.995795	-0.639358	-0.63667
293	0.0920487	0	2.35619	0.995767	-0.639117	-0.636411
294	0.0923628	0	2.35619	0.995738	-0.638875	-0.636152
295	0.092677	0	2.35619	0.995709	-0.638634	-0.635893
296	0.0929911	0	2.35619	0.995679	-0.638392	-0.635634
297	0.0933053	0	2.35619	0.99565	-0.63815	-0.635374
298	0.0936195	0	2.35619	0.995621	-0.637908	-0.635115
299	0.0939336	0	2.35619	0.995591	-0.637666	-0.634855
300	0.0942478	0	2.35619	0.995562	-0.637424	-0.634595
301	0.0945619	0	2.35619	0.995532	-0.637182	-0.634335
302	0.0948761	0	2.35619	0.995503	-0.63694	-0.634075
303	0.0951903	0	2.35619	0.995473	-0.636698	-0.633815
304	0.0955044	0	2.35619	0.995443	-0.636455	-0.633555
305	0.0958186	0	2.35619	0.995413	-0.636213	-0.633295
306	0.0961327	0	2.35619	0.995383	-0.63597	-0.633034
307	0.0964469	0	2.35619	0.995353	-0.635728	-0.632774
308	0.0967611	0	2.35619	0.995322	-0.635485	-0.632513
309	0.0970752	0	2.35619	0.995292	-0.635243	-0.632252
310	0.0973894	0	2.35619	0.995261	-0.635	-0.631991
311	0.0977035	0	2.35619	0.995231	-0.634757	-0.63173
312	0.0980177	0	2.35619	0.9952	-0.634515	-0.631469
313	0.0983319	0	2.35619	0.995169	-0.634272	-0.631208
314	0.098646	0	2.35619	0.995138	-0.634029	-0.630947
315	0.0989602	0	2.35619	0.995107	-0.633786	-0.630685
316	0.0992743	0	2.35619	0.995076	-0.633543	-0.630424
317	0.0995885	0	2.35619	0.995045	-0.6333	-0.630162
318	0.0999026	0	2.35619	0.995014	-0.633057	-0.6299
319	0.100217	0	2.35619	0.994982	-0.632813	-0.629638
320	0.100531	0	2.35619	0.994951	-0.63257	-0.629376
321	0.100845	0	2.35619	0.994919	-0.632327	-0.629114
322	0.101159	0	2.35619	0.994888	-0.632083	-0.628852
323	0.101473	0	2.35619	0.994856	-0.63184	-0.62859
324	0.101788	0	2.35619	0.994824	-0.631596	-0.628327
325	0.102102	0	2.35619	0.994792	-0.631353	-0.628065
326	0.102416	0	2.35619	0.99476	-0.631109	-0.627802
327	0.10273	0	2.35619	0.994728	-0.630865	-0.627539
328	0.103044	0	2.35619	0.994696	-0.630622	-0.627277
329	0.103358	0	2.35619	0.994663	-0.630378	-0.627014
330	0.103673	0	2.35619	0.994631	-0.630134	-0.626751
331	0.103987	0	2.35619	0.994598	-0.62989	-0.626487
332	0.104301	0	2.35619	0.994566	-0.629646	-0.626224
333	0.104615	0	2.35619	0.994533	-0.629402	-0.625961
334	0.104929	0	2.35619	0.9945	-0.629158	-0.625697
335	0.105243	0	2.35619	0.994467	-0.628913	-0.625434
336	0.105558	0	2.35619	0.994434	-0.628669	-0.62517
337	0.105872	0	2.35619	0.994401	-0.628425	-0.624906
338	0.106186	0	2.35619	0.994368	-0.62818	-0.624642
339	0.1065	0	2.35619	0.994334	-0.627936	-0.624378
340	0.106814	0	2.35619	0.994301	-0.627691	-0.624114
341	0.107128	0	2.35619	0.994267	-0.627447	-0.62385
342	0.107442	0	2.35619	0.994234	-0.627202	-0.623585
343	0.107757	0	2.35619	0.9942	-0.626957	-0.623321
344	0.108071	0	2.35619	0.994166	-0.626713	-0.623056
345	0.108385	0	2.35619	0.994132	-0.626468	-0.622792
346	0.108699	0	2.35619	0.994098	-0.626223	-0.622527
347	0.109013	0	2.35619	0.994064	-0.625978	-0.622262
348	0.109327	0	2.35619	0.99403	-0.625733	-0.621997
349	0.109642	0	2.35619	0.993995	-0.625488	-0.621732
350	0.109956	0	2.35619	0.993961	-0.625243	-0.621467
351	0.11027	0	2.35619	0.993926	-0.624997	-0.621201
352	0.110584	0	2.35619	0.993892	-0.624752	-0.620936
353	0.110898	0	2.35619	0.993857	-0.624507	-0.620671
354	0.111212	0	2.35619	0.993822	-0.624261	-0.620405
355	0.111527	0	2.35619	0.993787	-0.624016	-0.620139
356	0.111841	0	2.35619	0.993752	-0.62377	-0.619873
357	0.112155	0	2.35619	0.993717	-0.623525	-0.619607
358	0.112469	0	2.35619	0.993682	-0.623279	-0.619341
359	0.112783	0	2.35619	0.993647	-0.623034	-0.619075
360	0.113097	0	2.35619	0.993611	-0.622788	-0.618809
361	0.113411	0	2.35619	0.993576	-0.622542	-0.618543
362	0.113726	0	2.35619	0.99354	-0.622296	-0.618276
363	0.11404	0	2.35619	0.993505	-0.62205	-0.61801
364	0.114354	0	2.35619	0.993469	-0.621804	-0.617743
365	0.114668	0	2.35619	0.993433	-0.621558	-0.617476
366	0.114982	0	2.35619	0.993397	-0.621312	-0.617209
367	0.115296	0	2.35619	0.993361	-0.621066	-0.616942
368	0.115611	0	2.35619	0.993325	-0.620819	-0.616675
369	0.115925	0	2.35619	0.993288	-0.620573	-0.616408
370	0.116239	0	2.35619	0.993252	-0.620327	-0.616141
371	0.116553	0	2.35619	0.993215	-0.62008	-0.615873
372	0.116867	0	2.35619	0.993179	-0.619834	-0.615606
373	0.117181	0	2.35619	0.993142	-0.619587	-0.615338
374	0.117496	0	2.35619	0.993105	-0.619341	-0.61507
375	0.11781	0	2.35619	0.993068	-0.619094	-0.614803
376	0.118124	0	2.35619	0.993031	-0.618847	-0.614535
377	0.118438	0	2.35619	0.992994	-0.6186	-0.614267
378	0.118752	0	2.35619	0.992957	-0.618354	-0.613999
379	0.119066	0	2.35619	0.99292	-0.618107	-0.61373
380	0.119381	0	2.35619	0.992883	-0.61786	-0.613462
381	0.119695	0	2.35619	0.992845	-0.617613	-0.613194
382	0.120009	0	2.35619	0.992808	-0.617365	-0.612925
383	0.120323	0	2.35619	0.99277	-0.617118	-0.612656
384	0.120637	0	2.35619	0.992732	-0.616871	-0.612388
385	0.120951	0	2.35619	0.992694	-0.616624	-0.612119
386	0.121265	0	2.35619	0.992656	-0.616376	-0.61185
387	0.12158	0	2.35619	0.992618	-0.616129	-0.611581
388	0.121894	0	2.35619	0.99258	-0.615882	-0.611312
389	0.122208	0	2.35619	0.992542	-0.615634	-0.611043
390	0.122522	0	2.35619	0.992504	-0.615386	-0.610773
391	0.122836	0	2.35619	0.992465	-0.615139	-0.610504
392	0.12315	0	2.35619	0.992427	-0.614891	-0.610234
393	0.123465	0	2.35619	0.992388	-0.614643	-0.609965
394	0.123779	0	2.35619	0.992349	-0.614395	-0.609695
395	0.124093	0	2.35619	0.99231	-0.614147	-0.609425
396	0.124407	0	2.35619	0.992271	-0.6139	-0.609155
397	0.124721	0	2.35619	0.992232	-0.613651	-0.608885
398	0.125035	0	2.35619	0.992193	-0.613403	-0.608615
399	0.12535	0	2.35619	0.992154	-0.613155	-0.608344
400	0.125664	0	2.35619	0.992115	-0.612907	-0.608074
401	0.125978	0	2.35619	0.992075	-0.612659	-0.607804
402	0.126292	0	2.35619	0.992036	-0.61241	-0.607533
403	0.126606	0	2.35619	0.991996	-0.612162	-0.607262
404	0.12692	0	2.35619	0.991956	-0.611914	-0.606992
405	0.127235	0	2.35619	0.991917	-0.611665	-0.606721
406	0.127549	0	2.35619	0.991877	-0.611417	-0.60645
407	0.127863	0	2.35619	0.991837	-0.611168	-0.606179
408	0.128177	0	2.35619	0.991797	-0.610919	-0.605908
409	0.128491	0	2.35619	0.991756	-0.61067	-0.605636
410	0.128805	0	2.35619	0.991716	-0.610422	-0.605365
411	0.129119	0	2.35619	0.991676	-0.610173	-0.605094
412	0.129434	0	2.35619	0.991635	-0.609924	-0.604822
413	0.129748	0	2.35619	0.991595	-0.609675	-0.60455
414	0.130062	0	2.35619	0.991554	-0.609426	-0.604279
415	0.130376	0	2.35619	0.991513	-0.609177	-0.604007
416	0.13069	0	2.35619	0.991472	-0.608928	-0.603735
417	0.131004	0	2.35619	0.991431	-0.608678	-0.603463
418	0.131319	0	2.35619	0.99139	-0.608429	-0.603191
419	0.131633	0	2.35619	0.991349	-0.60818	-0.602918
420	0.131947	0	2.35619	0.991308	-0.60793	-0.602646
421	0.132261	0	2.35619	0.991266	-0.607681	-0.602373
422	0.132575	0	2.35619	0.991225	-0.607431	-0.602101
423	0.132889	0	2.35619	0.991183	-0.607182	-0.601828
424	0.133204	0	2.35619	0.991142	-0.606932	-0.601556
425	0.133518	0	2.35619	0.9911	-0.606682	-0.601283
426	0.133832	0	2.35619	0.991058	-0.606433	-0.60101
427	0.134146	0	2.35619	0.991016	-0.606183	-0.600737
428	0.13446	0	2.35619	0.990974	-0.605933	-0.600464
429	0.134774	0	2.35619	0.990932	-0.605683	-0.60019
430	0.135088	0	2.35619	0.990889	-0.605433	-0.599917
431	0.135403	0	2.35619	0.990847	-0.605183	-0.599644
432	0.135717	0	2.35619	0.990805	-0.604933	-0.59937
433	0.136031	0	2.35619	0.990762	-0.604683	-0.599096
434	0.136345	0	2.35619	0.990719	-0.604432	-0.598823
435	0.136659	0	2.35619	0.990677	-0.604182	-0.598549
436	0.136973	0	2.35619	0.990634	-0.603932	-0.598275
437	0.137288	0	2.35619	0.990591	-0.603681	-0.598001
438	0.137602	0	2.35619	0.990548	-0.603431	-0.597727
439	0.137916	0	2.35619	0.990505	-0.60318	-0.597453
440	0.13823	0	2.35619	0.990461	-0.60293	-0.597178
441	0.138544	0	2.35619	0.990418	-0.602679	-0.596904
442	0.138858	0	2.35619	0.990375	-0.602428	-0.59663
443	0.139173	0	2.35619	0.990331	-0.602177	-0.596355
444	0.139487	0	2.35619	0.990287	-0.601927	-0.59608
445	0.139801	0	2.35619	0.990244	-0.601676	-0.595806
446	0.140115	0	2.35619	0.9902	-0.601425	-0.595531
447	0.140429	0	2.35619	0.990156	-0.601174	-0.595256
448	0.140743	0	2.35619	0.990112	-0.600923	-0.594981
449	0.141058	0	2.35619	0.990068	-0.600671	-0.594705
450	0.141372	0	2.35619	0.990024	-0.60042	-0.59443
451	0.141686	0	2.35619	0.989979	-0.600169	-0.594155
452	0.142	0	2.35619	0.989935	-0.599918	-0.593879
453	0.142314	0	2.35619	0.98989	-0.599666	-0.593604
454	0.142628	0	2.35619	0.989846	-0.599415	-0.593328
455	0.142942	0	2.35619	0.989801	-0.599163	-0.593053
456	0.143257	0	2.35619	0.989756	-0.598912	-0.592777
457	0.143571	0	2.35619	0.989711	-0.59866	-0.592501
458	0.143885	0	2.35619	0.989666	-0.598409	-0.592225
459	0.144199	0	2.35619	0.989621	-0.598157	-0.591949
460	0.144513	0	2.35619	0.989576	-0.597905	-0.591672
461	0.144827	0	2.35619	0.989531	-0.597653	-0.591396
462	0.145142	0	2.35619	0.989485	-0.597401	-0.59112
463	0.145456	0	2.35619	0.98944	-0.597149	-0.590843
464	0.14577	0	2.35619	0.989394	-0.596897	-0.590567
465	0.146084	0	2.35619	0.989349	-0.596645	-0.59029
466	0.146398	0	2.35619	0.989303	-0.596393	-0.590013
467	0.146712	0	2.35619	0.989257	-0.596141	-0.589736
468	0.147027	0	2.35619	0.989211	-0.595889	-0.58946
469	0.147341	0	2.35619	0.989165	-0.595636	-0.589182
470	0.147655	0	2.35619	0.989119	-0.595384	-0.588905
471	0.147969	0	2.35619	0.989073	-0.595131	-0.588628
472	0.148283	0	2.35619	0.989026	-0.594879	-0.588351
473	0.148597	0	2.35619	0.98898	-0.594626	-0.588073
474	0.148911	0	2.35619	0.988933	-0.594374	-0.587796
475	0.149226	0	2.35619	0.988886	-0.594121	-0.587518
476	0.14954	0	2.35619	0.98884	-0.593868	-0.587241
477	0.149854	0	2.35619	0.988793	-0.593616	-0.586963
478	0.150168	0	2.35619	0.988746	-0.593363	-0.586685
479	0.150482	0	2.35619	0.988699	-0.59311	-0.586407
480	0.150796	0	2.35619	0.988652	-0.592857	-0.586129
481	0.151111	0	2.35619	0.988605	-0.592604	-0.585851
482	0.151425	0	2.35619	0.988557	-0.592351	-0.585573
483	0.151739	0	2.35619	0.98851	-0.592098	-0.585294
484	0.152053	0	2.35619	0.988462	-0.591844	-0.585016
485	0.152367	0	2.35619	0.988415	-0.591591	-0.584737
486	0.152681	0	2.35619	0.988367	-0.591338	-0.584459
487	0.152996	0	2.35619	0.988319	-0.591084	-0.58418
488	0.15331	0	2.35619	0.988271	-0.590831	-0.583901
489	0.153624	0	2.35619	0.988223	-0.590577	-0.583622
490	0.153938	0	2.35619	0.988175	-0.590324	-0.583343
491	0.154252	0	2.35619	0.988127	-0.59007	-0.583064
492	0.154566	0	2.35619	0.988078	-0.589817	-0.582785
493	0.154881	0	2.35619	0.98803	-0.589563	-0.582506
494	0.155195	0	2.35619	0.987981	-0.589309	-0.582227
495	0.155509	0	2.35619	0.987933	-0.589055	-0.581947
496	0.155823	0	2.35619	0.987884	-0.588801	-0.581668
497	0.156137	0	2.35619	0.987835	-0.588547	-0.581388
498	0.156451	0	2.35619	0.987786	-0.588293	-0.581108
499	0.156765	0	2.35619	0.987737	-0.588039	-0.580829
500	0.15708	0	2.35619	0.987688	-0.587785	-0.580549
501	0.157394	0	2.35619	0.987639	-0.587531	-0.580269
502	0.157708	0	2.35619	0.98759	-0.587277	-0.579989
503	0.158022	0	2.35619	0.98754	-0.587023	-0.579708
504	0.158336	0	2.35619	0.987491	-0.586768	-0.579428
505	0.15865	0	2.35619	0.987441	-0.586514	-0.579148
506	0.158965	0	2.35619	0.987392	-0.586259	-0.578868
507	0.159279	0	2.35619	0.987342	-0.586005	-0.578587
508	0.159593	0	2.35619	0.987292	-0.58575	-0.578306
509	0.159907	0	2.35619	0.987242	-0.585495	-0.578026
510	0.160221	0	2.35619	0.987192	-0.585241	-0.577745
511	0.160535	0	2.35619	0.987142	-0.584986	-0.577464
512	0.16085	0	2.35619	0.987092	-0.584731	-0.577183
513	0.161164	0	2.35619	0.987041	-0.584476	-0.576902
514	0.161478	0	2.35619	0.986991	-0.584221	-0.576621
515	0.161792	0	2.35619	0.98694	-0.583966	-0.57634
516	0.162106	0	2.35619	0.98689	-0.583711	-0.576059
517	0.16242	0	2.35619	0.986839	-0.583456	-0.575777
518	0.162734	0	2.35619	0.986788	-0.583201	-0.575496
519	0.163049	0	2.35619	0.986737	-0.582946	-0.575214
520	0.163363	0	2.35619	0.986686	-0.58269	-0.574933
521	0.163677	0	2.35619	0.986635	-0.582435	-0.574651
522	0.163991	0	2.35619	0.986584	-0.58218	-0.574369
523	0.164305	0	2.35619	0.986532	-0.581924	-0.574087
524	0.164619	0	2.35619	0.986481	-0.581669	-0.573805
525	0.164934	0	2.35619	0.986429	-0.581413	-0.573523
526	0.165248	0	2.35619	0.986378	-0.581158	-0.573241
527	0.165562	0	2.35619	0.986326	-0.580902	-0.572959
528	0.165876	0	2.35619	0.986274	-0.580646	-0.572676
529	0.16619	0	2.35619	0.986222	-0.58039	-0.572394
530	0.166504	0	2.35619	0.98617	-0.580134	-0.572111
531	0.166819	0	2.35619	0.986118	-0.579879	-0.571829
532	0.167133	0	2.35619	0.986066	-0.579623	-0.571546
533	0.167447	0	2.35619	0.986013	-0.579367	-0.571263
534	0.167761	0	2.35619	0.985961	-0.57911	-0.57098
535	0.168075	0	2.35619	0.985909	-0.578854	-0.570697
536	0.168389	0	2.35619	0.985856	-0.578598	-0.570414
537	0.168704	0	2.35619	0.985803	-0.578342	-0.570131
538	0.169018	0	2.35619	0.98575	-0.578086	-0.569848
539	0.169332	0	2.35619	0.985698	-0.577829	-0.569565
540	0.169646	0	2.35619	0.985645	-0.577573	-0.569281
541	0.16996	0	2.35619	0.985592	-0.577316	-0.568998
542	0.170274	0	2.35619	0.985538	-0.57706	-0.568714
543	0.170588	0	2.35619	0.985485	-0.576803	-0.568431
544	0.170903	0	2.35619	0.985432	-0.576546	-0.568147
545	0.171217	0	2.35619	0.985378	-0.57629	-0.567863
546	0.171531	0	2.35619	0.985325	-0.576033	-0.567579
547	0.171845	0	2.35619	0.985271	-0.575776	-0.567295
548	0.172159	0	2.35619	0.985217	-0.575519	-0.567011
549	0.172473	0	2.35619	0.985163	-0.575262	-0.566727
550	0.172788	0	2.35619	0.985109	-0.575005	-0.566443
551	0.173102	0	2.35619	0.985055	-0.574748	-0.566159
552	0.173416	0	2.35619	0.985001	-0.574491	-0.565874
553	0.17373	0	2.35619	0.984947	-0.574234	-0.56559
554	0.174044	0	2.35619	0.984892	-0.573977	-0.565305
555	0.174358	0	2.35619	0.984838	-0.573719	-0.565021
556	0.174673	0	2.35619	0.984783	-0.573462	-0.564736
557	0.174987	0	2.35619	0.984729	-0.573205	-0.564451
558	0.175301	0	2.35619	0.984674	-0.572947	-0.564166
559	0.175615	0	2.35619	0.984619	-0.57269	-0.563881
560	0.175929	0	2.35619	0.984564	-0.572432	-0.563596
561	0.176243	0	2.35619	0.984509	-0.572175	-0.563311
562	0.176558	0	2.35619	0.984454	-0.571917	-0.563026
563	0.176872	0	2.35619	0.984399	-0.571659	-0.562741
564	0.177186	0	2.35619	0.984344	-0.571401	-0.562455
565	0.1775	0	2.35619	0.984288	-0.571143	-0.56217
566	0.177814	0	2.35619	0.984233	-0.570886	-0.561884
567	0.178128	0	2.35619	0.984177	-0.570628	-0.561599
568	0.178442	0	2.35619	0.984121	-0.57037	-0.561313
569	0.178757	0	2.35619	0.984066	-0.570111	-0.561027
570	0.179071	0	2.35619	0.98401	-0.569853	-0.560741
571	0.179385	0	2.35619	0.983954	-0.569595	-0.560455
572	0.179699	0	2.35619	0.983898	-0.569337	-0.560169
573	0.180013	0	2.35619	0.983841	-0.569079	-0.559883
574	0.180327	0	2.35619	0.983785	-0.56882	-0.559597
575	0.180642	0	2.35619	0.983729	-0.568562	-0.559311
576	0.180956	0	2.35619	0.983672	-0.568303	-0.559024
577	0.18127	0	2.35619	0.983616	-0.568045	-0.558738
578	0.181584	0	2.35619	0.983559	-0.567786	-0.558451
579	0.181898	0	2.35619	0.983502	-0.567528	-0.558165
580	0.182212	0	2.35619	0.983445	-0.567269	-0.557878
581	0.182527	0	2.35619	0.983388	-0.56701	-0.557591
582	0.182841	0	2.35619	0.983331	-0.566751	-0.557304
583	0.183155	0	2.35619	0.983274	-0.566493	-0.557017
584	0.183469	0	2.35619	0.983217	-0.566234	-0.55673
585	0.183783	0	2.35619	0.983159	-0.565975	-0.556443
586	0.184097	0	2.35619	0.983102	-0.565716	-0.556156
587	0.184411	0	2.35619	0.983044	-0.565457	-0.555869
588	0.184726	0	2.35619	0.982987	-0.565197	-0.555582
589	0.18504	0	2.35619	0.982929	-0.564938	-0.555294
590	0.185354	0	2.35619	0.982871	-0.564679	-0.555007
591	0.185668	0	2.35619	0.982813	-0.56442	-0.554719
592	0.185982	0	2.35619	0.982755	-0.56416	-0.554431
593	0.186296	0	2.35619	0.982697	-0.563901	-0.554144
594	0.186611	0	2.35619	0.982639	-0.563641	-0.553856
595	0.186925	0	2.35619	0.98258	-0.563382	-0.553568
596	0.187239	0	2.35619	0.982522	-0.563122	-0.55328
597	0.187553	0	2.35619	0.982463	-0.562863	-0.552992
598	0.187867	0	2.35619	0.982405	-0.562603	-0.552704
599	0.188181	0	2.35619	0.982346	-0.562343	-0.552416
600	0.188496	0	2.35619	0.982287	-0.562083	-0.552127
601	0.18881	0	2.35619	0.982228	-0.561824	-0.551839
602	0.189124	0	2.35619	0.982169	-0.561564	-0.551551
603	0.189438	0	2.35619	0.98211	-0.561304	-0.551262
604	0.189752	0	2.35619	0.982051	-0.561044	-0.550973
605	0.190066	0	2.35619	0.981992	-0.560784	-0.550685
606	0.190381	0	2.35619	0.981932	-0.560523	-0.550396
607	0.190695	0	2.35619	0.981873	-0.560263	-0.550107
608	0.191009	0	2.35619	0.981813	-0.560003	-0.549818
609	0.191323	0	2.35619	0.981754	-0.559743	-0.549529
610	0.191637	0	2.35619	0.981694	-0.559482	-0.54924
611	0.191951	0	2.35619	0.981634	-0.559222	-0.548951
612	0.192265	0	2.35619	0.981574	-0.558961	-0.548662
613	0.19258	0	2.35619	0.981514	-0.558701	-0.548373
614	0.192894	0	2.35619	0.981454	-0.55844	-0.548083
615	0.193208	0	2.35619	0.981393	-0.55818	-0.547794
616	0.193522	0	2.35619	0.981333	-0.557919	-0.547504
617	0.193836	0	2.35619	0.981272	-0.557658	-0.547215
618	0.19415	0	2.35619	0.981212	-0.557397	-0.546925
619	0.194465	0	2.35619	0.981151	-0.557137	-0.546635
620	0.194779	0	2.35619	0.981091	-0.556876	-0.546345
621	0.195093	0	2.35619	0.98103	-0.556615	-0.546055
622	0.195407	0	2.35619	0.980969	-0.556354	-0.545766
623	0.195721	0	2.35619	0.980908	-0.556093	-0.545475
624	0.196035	0	2.35619	0.980847	-0.555831	-0.545185
625	0.19635	0	2.35619	0.980785	-0.55557	-0.544895
626	0.196664	0	2.35619	0.980724	-0.555309	-0.544605
627	0.196978	0	2.35619	0.980663	-0.555048	-0.544314
628	0.197292	0	2.35619	0.980601	-0.554786	-0.544024
629	0.197606	0	2.35619	0.980539	-0.554525	-0.543734
630	0.19792	0	2.35619	0.980478	-0.554263	-0.543443
631	0.198234	0	2.35619	0.980416	-0.554002	-0.543152
632	0.198549	0	2.35619	0.980354	-0.55374	-0.542862
633	0.198863	0	2.35619	0.980292	-0.553479	-0.542571
634	0.199177	0	2.35619	0.98023	-0.553217	-0.54228
635	0.199491	0	2.35619	0.980168	-0.552955	-0.541989
636	0.199805	0	2.35619	0.980105	-0.552694	-0.541698
637	0.200119	0	2.35619	0.980043	-0.552432	-0.541407
638	0.200434	0	2.35619	0.97998	-0.55217	-0.541116
639	0.200748	0	2.35619	0.979918	-0.551908	-0.540824
640	0.201062	0	2.35619	0.979855	-0.551646	-0.540533
641	0.201376	0	2.35619	0.979792	-0.551384	-0.540242
642	0.20169	0	2.35619	0.979729	-0.551122	-0.53995
643	0.202004	0	2.35619	0.979666	-0.55086	-0.539659
644	0.202319	0	2.35619	0.979603	-0.550597	-0.539367
645	0.202633	0	2.35619	0.97954	-0.550335	-0.539075
646	0.202947	0	2.35619	0.979477	-0.550073	-0.538783
647	0.203261	0	2.35619	0.979413	-0.54981	-0.538492
648	0.203575	0	2.35619	0.97935	-0.549548	-0.5382
649	0.203889	0	2.35619	0.979286	-0.549285	-0.537908
650	0.204204	0	2.35619	0.979223	-0.549023	-0.537616
651	0.204518	0	2.35619	0.979159	-0.54876	-0.537324
652	0.204832	0	2.35619	0.979095	-0.548498	-0.537031
653	0.205146	0	2.35619	0.979031	-0.548235	-0.536739
654	0.20546	0	2.35619	0.978967	-0.547972	-0.536447
655	0.205774	0	2.35619	0.978903	-0.547709	-0.536154
656	0.206088	0	2.35619	0.978839	-0.547446	-0.535862
657	0.206403	0	2.35619	0.978774	-0.547183	-0.535569
658	0.206717	0	2.35619	0.97871	-0.54692	-0.535277
659	0.207031	0	2.35619	0.978646	-0.546657	-0.534984
660	0.207345	0	2.35619	0.978581	-0.546394	-0.534691
661	0.207659	0	2.35619	0.978516	-0.546131	-0.534398
662	0.207973	0	2.35619	0.978451	-0.545868	-0.534105
663	0.208288	0	2.35619	0.978386	-0.545605	-0.533812
664	0.208602	0	2.35619	0.978321	-0.545341	-0.533519
665	0.208916	0	2.35619	0.978256	-0.545078	-0.533226
666	0.20923	0	2.35619	0.978191	-0.544815	-0.532933
667	0.209544	0	2.35619	0.978126	-0.544551	-0.53264
668	0.209858	0	2.35619	0.97806	-0.544288	-0.532346
669	0.210173	0	2.35619	0.977995	-0.544024	-0.532053
670	0.210487	0	2.35619	0.977929	-0.54376	-0.531759
671	0.210801	0	2.35619	0.977864	-0.543497	-0.531466
672	0.211115	0	2.35619	0.977798	-0.543233	-0.531172
673	0.211429	0	2.35619	0.977732	-0.542969	-0.530878
674	0.211743	0	2.35619	0.977666	-0.542705	-0.530585
675	0.212058	0	2.35619	0.9776	-0.542442	-0.530291
676	0.212372	0	2.35619	0.977534	-0.542178	-0.529997
677	0.212686	0	2.35619	0.977468	-0.541914	-0.529703
678	0.213	0	2.35619	0.977401	-0.54165	-0.529409
679	0.213314	0	2.35619	0.977335	-0.541385	-0.529115
680	0.213628	0	2.35619	0.977268	-0.541121	-0.528821
681	0.213942	0	2.35619	0.977201	-0.540857	-0.528526
682	0.214257	0	2.35619	0.977135	-0.540593	-0.528232
683	0.214571	0	2.35619	0.977068	-0.540328	-0.527938
684	0.214885	0	2.35619	0.977001	-0.540064	-0.527643
685	0.215199	0	2.35619	0.976934	-0.5398	-0.527349
686	0.215513	0	2.35619	0.976867	-0.539535	-0.527054
687	0.215827	0	2.35619	0.9768	-0.539271	-0.526759
688	0.216142	0	2.35619	0.976732	-0.539006	-0.526465
689	0.216456	0	2.35619	0.976665	-0.538741	-0.52617
690	0.21677	0	2.35619	0.976597	-0.538477	-0.525875
691	0.217084	0	2.35619	0.97653	-0.538212	-0.52558
692	0.217398	0	2.35619	0.976462	-0.537947	-0.525285
693	0.217712	0	2.35619	0.976394	-0.537682	-0.52499
694	0.218027	0	2.35619	0.976326	-0.537417	-0.524695
695	0.218341	0	2.35619	0.976258	-0.537152	-0.524399
696	0.218655	0	2.35619	0.97619	-0.536887	-0.524104
697	0.218969	0	2.35619	0.976122	-0.536622	-0.523809
698	0.219283	0	2.35619	0.976054	-0.536357	-0.523513
699	0.219597	0	2.35619	0.975985	-0.536092	-0.523218
700	0.219911	0	2.35619	0.975917	-0.535827	-0.522922
701	0.220226	0	2.35619	0.975848	-0.535562	-0.522627
702	0.22054	0	2.35619	0.97578	-0.535296	-0.522331
703	0.220854	0	2.35619	0.975711	-0.535031	-0.522035
704	0.221168	0	2.35619	0.975642	-0.534765	-0.521739
705	0.221482	0	2.35619	0.975573	-0.5345	-0.521444
706	0.221796	0	2.35619	0.975504	-0.534234	-0.521148
707	0.222111	0	2.35619	0.975435	-0.533969	-0.520852
708	0.222425	0	2.35619	0.975365	-0.533703	-0.520556
709	0.222739	0	2.35619	0.975296	-0.533437	-0.520259
710	0.223053	0	2.35619	0.975227	-0.533172	-0.519963
711	0.223367	0	2.35619	0.975157	-0.532906	-0.519667
712	0.223681	0	2.35619	0.975087	-0.53264	-0.519371
713	0.223996	0	2.35619	0.975018	-0.532374	-0.519074
714	0.22431	0	2.35619	0.974948	-0.532108	-0.518778
715	0.224624	0	2.35619	0.974878	-0.531842	-0.518481
716	0.224938	0	2.35619	0.974808	-0.531576	-0.518184
717	0.225252	0	2.35619	0.974738	-0.53131	-0.517888
718	0.225566	0	2.35619	0.974668	-0.531044	-0.517591
719	0.225881	0	2.35619	0.974597	-0.530777	-0.517294
720	0.226195	0	2.35619	0.974527	-0.530511	-0.516997
721	0.226509	0	2.35619	0.974456	-0.530245	-0.5167
722	0.226823	0	2.35619	0.974386	-0.529978	-0.516403
723	0.227137	0	2.35619	0.974315	-0.529712	-0.516106
724	0.227451	0	2.35619	0.974244	-0.529446	-0.515809
725	0.227765	0	2.35619	0.974173	-0.529179	-0.515512
726	0.22808	0	2.35619	0.974102	-0.528912	-0.515215
727	0.228394	0	2.35619	0.974031	-0.528646	-0.514918
728	0.228708	0	2.35619	0.97396	-0.528379	-0.51462
729	0.229022	0	2.35619	0.973889	-0.528112	-0.514323
730	0.229336	0	2.35619	0.973817	-0.527846	-0.514025
731	0.22965	0	2.35619	0.973746	-0.527579	-0.513728
732	0.229965	0	2.35619	0.973674	-0.527312	-0.51343
733	0.230279	0	2.35619	0.973603	-0.527045	-0.513132
734	0.230593	0	2.35619	0.973531	-0.526778	-0.512835
735	0.230907	0	2.35619	0.973459	-0.526511	-0.512537
736	0.231221	0	2.35619	0.973387	-0.526244	-0.512239
737	0.231535	0	2.35619	0.973315	-0.525976	-0.511941
738	0.23185	0	2.35619	0.973243	-0.525709	-0.511643
739	0.232164	0	2.35619	0.973171	-0.525442	-0.511345
740	0.232478	0	2.35619	0.973099	-0.525175	-0.511047
741	0.232792	0	2.35619	0.973026	-0.524907	-0.510748
742	0.233106	0	2.35619	0.972954	-0.52464	-0.51045
743	0.23342	0	2.35619	0.972881	-0.524372	-0.510152
744	0.233734	0	2.35619	0.972808	-0.524105	-0.509853
745	0.234049	0	2.35619	0.972735	-0.523837	-0.509555
746	0.234363	0	2.35619	0.972663	-0.52357	-0.509257
747	0.234677	0	2.35619	0.97259	-0.523302	-0.508958
748	0.234991	0	2.35619	0.972516	-0.523034	-0.508659
749	0.235305	0	2.35619	0.972443	-0.522766	-0.508361
750	0.235619	0	2.35619	0.97237	-0.522499	-0.508062
751	0.235934	0	2.35619	0.972297	-0.522231	-0.507763
752	0.236248	0	2.35619	0.972223	-0.521963	-0.507464
753	0.236562	0	2.35619	0.972149	-0.521695	-0.507165
754	0.236876	0	2.35619	0.972076	-0.521427	-0.506866
755	0.23719	0	2.35619	0.972002	-0.521159	-0.506567
756	0.237504	0	2.35619	0.971928	-0.52089	-0.506268
757	0.237819	0	2.35619	0.971854	-0.520622	-0.505969
758	0.238133	0	2.35619	0.97178	-0.520354	-0.50567
759	0.238447	0	2.35619	0.971706	-0.520086	-0.50537
760	0.238761	0	2.35619	0.971632	-0.519817	-0.505071
761	0.239075	0	2.35619	0.971557	-0.519549	-0.504772
762	0.239389	0	2.35619	0.971483	-0.51928	-0.504472
763	0.239704	0	2.35619	0.971408	-0.519012	-0.504173
764	0.240018	0	2.35619	0.971334	-0.518743	-0.503873
765	0.240332	0	2.35619	0.971259	-0.518475	-0.503573
766	0.240646	0	2.35619	0.971184	-0.518206	-0.503274
767	0.24096	0	2.35619	0.971109	-0.517937	-0.502974
768	0.241274	0	2.35619	0.971034	-0.517669	-0.502674
769	0.241588	0	2.35619	0.970959	-0.5174	-0.502374
770	0.241903	0	2.35619	0.970884	-0.517131	-0.502074
771	0.242217	0	2.35619	0.970809	-0.516862	-0.501774
772	0.242531	0	2.35619	0.970733	-0.516593	-0.501474
773	0.242845	0	2.35619	0.970658	-0.516324	-0.501174
774	0.243159	0	2.35619	0.970582	-0.516055	-0.500874
775	0.243473	0	2.35619	0.970506	-0.515786	-0.500574
776	0.243788	0	2.35619	0.970431	-0.515517	-0.500273
777	0.244102	0	2.35619	0.970355	-0.515248	-0.499973
778	0.244416	0	2.35619	0.970279	-0.514978	-0.499672
779	0.24473	0	2.35619	0.970203	-0.514709	-0.499372
780	0.245044	0	2.35619	0.970127	-0.51444	-0.499071
781	0.245358	0	2.35619	0.97005	-0.51417	-0.498771
782	0.245673	0	2.35619	0.969974	-0.513901	-0.49847
783	0.245987	0	2.35619	0.969898	-0.513631	-0.49817
784	0.246301	0	2.35619	0.969821	-0.513362	-0.497869
785	0.246615	0	2.35619	0.969744	-0.513092	-0.497568
786	0.246929	0	2.35619	0.969668	-0.512822	-0.497267
787	0.247243	0	2.35619	0.969591	-0.512552	-0.496966
788	0.247558	0	2.35619	0.969514	-0.512283	-0.496665
789	0.247872	0	2.35619	0.969437	-0.512013	-0.496364
790	0.248186	0	2.35619	0.96936	-0.511743	-0.496063
791	0.2485	0	2.35619	0.969282	-0.511473	-0.495762
792	0.248814	0	2.35619	0.969205	-0.511203	-0.495461
793	0.249128	0	2.35619	0.969128	-0.510933	-0.495159
794	0.249442	0	2.35619	0.96905	-0.510663	-0.494858
795	0.249757	0	2.35619	0.968973	-0.510393	-0.494557
796	0.250071	0	2.35619	0.968895	-0.510123	-0.494255
797	0.250385	0	2.35619	0.968817	-0.509852	-0.493954
798	0.250699	0	2.35619	0.968739	-0.509582	-0.493652
799	0.251013	0	2.35619	0.968661	-0.509312	-0.493351
800	0.251327	0	2.35619	0.968583	-0.509041	-0.493049
801	0.251642	0	2.35619	0.968505	-0.508771	-0.492747
802	0.251956	0	2.35619	0.968427	-0.5085	-0.492445
803	0.25227	0	2.35619	0.968348	-0.50823	-0.492144
804	0.252584	0	2.35619	0.96827	-0.507959	-0.491842
805	0.252898	0	2.35619	0.968191	-0.507689	-0.49154
806	0.253212	0	2.35619	0.968113	-0.507418	-0.491238
807	0.253527	0	2.35619	0.968034	-0.507147	-0.490936
808	0.253841	0	2.35619	0.967955	-0.506877	-0.490634
809	0.254155	0	2.35619	0.967876	-0.506606	-0.490332
810	0.254469	0	2.35619	0.967797	-0.506335	-0.490029
811	0.254783	0	2.35619	0.967718	-0.506064	-0.489727
812	0.255097	0	2.35619	0.967639	-0.505793	-0.489425
813	0.255411	0	2.35619	0.967559	-0.505522	-0.489122
814	0.255726	0	2.35619	0.96748	-0.505251	-0.48882
815	0.25604	0	2.35619	0.9674	-0.50498	-0.488518
816	0.256354	0	2.35619	0.967321	-0.504708	-0.488215
817	0.256668	0	2.35619	0.967241	-0.504437	-0.487912
818	0.256982	0	2.35619	0.967161	-0.504166	-0.48761
819	0.257296	0	2.35619	0.967081	-0.503895	-0.487307
820	0.257611	0	2.35619	0.967001	-0.503623	-0.487004
821	0.257925	0	2.35619	0.966921	-0.503352	-0.486702
822	0.258239	0	2.35619	0.966841	-0.50308	-0.486399
823	0.258553	0	2.35619	0.966761	-0.502809	-0.486096
824	0.258867	0	2.35619	0.966681	-0.502537	-0.485793
825	0.259181	0	2.35619	0.9666	-0.502266	-0.48549
826	0.259496	0	2.35619	0.96652	-0.501994	-0.485187
827	0.25981	0	2.35619	0.966439	-0.501722	-0.484884
828	0.260124	0	2.35619	0.966358	-0.50145	-0.484581
829	0.260438	0	2.35619	0.966277	-0.501179	-0.484277
830	0.260752	0	2.35619	0.966196	-0.500907	-0.483974
831	0.261066	0	2.35619	0.966115	-0.500635	-0.483671
832	0.261381	0	2.35619	0.966034	-0.500363	-0.483367
833	0.261695	0	2.35619	0.965953	-0.500091	-0.483064
834	0.262009	0	2.35619	0.965872	-0.499819	-0.482761
835	0.262323	0	2.35619	0.96579	-0.499546	-0.482457
836	0.262637	0	2.35619	0.965709	-0.499274	-0.482154
837	0.262951	0	2.35619	0.965627	-0.499002	-0.48185
838	0.263265	0	2.35619	0.965545	-0.49873	-0.481546
839	0.26358	0	2.35619	0.965464	-0.498457	-0.481243
840	0.263894	0	2.35619	0.965382	-0.498185	-0.480939
841	0.264208	0	2.35619	0.9653	-0.497913	-0.480635
842	0.264522	0	2.35619	0.965218	-0.49764	-0.480331
843	0.264836	0	2.35619	0.965135	-0.497368	-0.480027
844	0.26515	0	2.35619	0.965053	-0.497095	-0.479723
845	0.265465	0	2.35619	0.964971	-0.496822	-0.479419
846	0.265779	0	2.35619	0.964888	-0.49655	-0.479115
847	0.266093	0	2.35619	0.964806	-0.496277	-0.478811
848	0.266407	0	2.35619	0.964723	-0.496004	-0.478507
849	0.266721	0	2.35619	0.96464	-0.495732	-0.478203
850	0.267035	0	2.35619	0.964557	-0.495459	-0.477898
851	0.26735	0	2.35619	0.964474	-0.495186	-0.477594
852	0.267664	0	2.35619	0.964391	-0.494913	-0.47729
853	0.267978	0	2.35619	0.964308	-0.49464	-0.476985
854	0.268292	0	2.35619	0.964225	-0.494367	-0.476681
855	0.268606	0	2.35619	0.964142	-0.494094	-0.476376
856	0.26892	0	2.35619	0.964058	-0.49382	-0.476072
857	0.269234	0	2.35619	0.963975	-0.493547	-0.475767
858	0.269549	0	2.35619	0.963891	-0.493274	-0.475462
859	0.269863	0	2.35619	0.963807	-0.493001	-0.475158
860	0.270177	0	2.35619	0.963724	-0.492727	-0.474853
861	0.270491	0	2.35619	0.96364	-0.492454	-0.474548
862	0.270805	0	2.35619	0.963556	-0.49218	-0.474243
863	0.271119	0	2.35619	0.963472	-0.491907	-0.473938
864	0.271434	0	2.35619	0.963388	-0.491633	-0.473634
865	0.271748	0	2.35619	0.963303	-0.49136	-0.473329
866	0.272062	0	2.35619	0.963219	-0.491086	-0.473024
867	0.272376	0	2.35619	0.963134	-0.490813	-0.472718
868	0.27269	0	2.35619	0.96305	-0.490539	-0.472413
869	0.273004	0	2.35619	0.962965	-0.490265	-0.472108
870	0.273319	0	2.35619	0.96288	-0.489991	-0.471803
871	0.273633	0	2.35619	0.962796	-0.489717	-0.471498
872	0.273947	0	2.35619	0.962711	-0.489443	-0.471192
873	0.274261	0	2.35619	0.962626	-0.489169	-0.470887
874	0.274575	0	2.35619	0.96254	-0.488895	-0.470582
875	0.274889	0	2.35619	0.962455	-0.488621	-0.470276
876	0.275204	0	2.35619	0.96237	-0.488347	-0.469971
877	0.275518	0	2.35619	0.962284	-0.488073	-0.469665
878	0.275832	0	2.35619	0.962199	-0.487799	-0.469359
879	0.276146	0	2.35619	0.962113	-0.487524	-0.469054
880	0.27646	0	2.35619	0.962028	-0.48725	-0.468748
881	0.276774	0	2.35619	0.961942	-0.486976	-0.468442
882	0.277088	0	2.35619	0.961856	-0.486701	-0.468137
883	0.277403	0	2.35619	0.96177	-0.486427	-0.467831
884	0.277717	0	2.35619	0.961684	-0.486152	-0.467525
885	0.278031	0	2.35619	0.961598	-0.485878	-0.467219
886	0.278345	0	2.35619	0.961511	-0.485603	-0.466913
887	0.278659	0	2.35619	0.961425	-0.485329	-0.466607
888	0.278973	0	2.35619	0.961339	-0.485054	-0.466301
889	0.279288	0	2.35619	0.961252	-0.484779	-0.465995
890	0.279602	0	2.35619	0.961165	-0.484504	-0.465689
891	0.279916	0	2.35619	0.961079	-0.484229	-0.465383
892	0.28023	0	2.35619	0.960992	-0.483955	-0.465076
893	0.280544	0	2.35619	0.960905	-0.48368	-0.46477
894	0.280858	0	2.35619	0.960818	-0.483405	-0.464464
895	0.281173	0	2.35619	0.960731	-0.48313	-0.464157
896	0.281487	0	2.35619	0.960644	-0.482854	-0.463851
897	0.281801	0	2.35619	0.960556	-0.482579	-0.463545
898	0.282115	0	2.35619	0.960469	-0.482304	-0.463238
899	0.282429	0	2.35619	0.960381	-0.482029	-0.462932
900	0.282743	0	2.35619	0.960294	-0.481754	-0.462625
901	0.283057	0	2.35619	0.960206	-0.481478	-0.462318
902	0.283372	0	2.35619	0.960118	-0.481203	-0.462012
903	0.283686	0	2.35619	0.96003	-0.480928	-0.461705
904	0.284	0	2.35619	0.959942	-0.480652	-0.461398
905	0.284314	0	2.35619	0.959854	-0.480377	-0.461092
906	0.284628	0	2.35619	0.959766	-0.480101	-0.460785
907	0.284942	0	2.35619	0.959678	-0.479825	-0.460478
908	0.285257	0	2.35619	0.959589	-0.47955	-0.460171
909	0.285571	0	2.35619	0.959501	-0.479274	-0.459864
910	0.285885	0	2.35619	0.959412	-0.478998	-0.459557
911	0.286199	0	2.35619	0.959324	-0.478723	-0.45925
912	0.286513	0	2.35619	0.959235	-0.478447	-0.458943
913	0.286827	0	2.35619	0.959146	-0.478171	-0.458636
914	0.287142	0	2.35619	0.959057	-0.477895	-0.458329
915	0.287456	0	2.35619	0.958968	-0.477619	-0.458021
916	0.28777	0	2.35619	0.958879	-0.477343	-0.457714
917	0.288084	0	2.35619	0.95879	-0.477067	-0.457407
918	0.288398	0	2.35619	0.958701	-0.476791	-0.457099
919	0.288712	0	2.35619	0.958611	-0.476514	-0.456792
920	0.289027	0	2.35619	0.958522	-0.476238	-0.456485
921	0.289341	0	2.35619	0.958432	-0.475962	-0.456177
922	0.289655	0	2.35619	0.958343	-0.475686	-0.45587
923	0.289969	0	2.35619	0.958253	-0.475409	-0.455562
924	0.290283	0	2.35619	0.958163	-0.475133	-0.455255
925	0.290597	0	2.35619	0.958073	-0.474856	-0.454947
926	0.290911	0	2.35619	0.957983	-0.47458	-0.454639
927	0.291226	0	2.35619	0.957893	-0.474303	-0.454332
928	0.29154	0	2.35619	0.957802	-0.474027	-0.454024
929	0.291854	0	2.35619	0.957712	-0.47375	-0.453716
930	0.292168	0	2.35619	0.957622	-0.473473	-0.453408
931	0.292482	0	2.35619	0.957531	-0.473197	-0.453101
932	0.292796	0	2.35619	0.95744	-0.47292	-0.452793
933	0.293111	0	2.35619	0.95735	-0.472643	-0.452485
934	0.293425	0	2.35619	0.957259	-0.472366	-0.452177
935	0.293739	0	2.35619	0.957168	-0.472089	-0.451869
936	0.294053	0	2.35619	0.957077	-0.471812	-0.451561
937	0.294367	0	2.35619	0.956986	-0.471535	-0.451253
938	0.294681	0	2.35619	0.956895	-0.471258	-0.450944
939	0.294996	0	2.35619	0.956803	-0.470981	-0.450636
940	0.29531	0	2.35619	0.956712	-0.470704	-0.450328
941	0.295624	0	2.35619	0.956621	-0.470427	-0.45002
942	0.295938	0	2.35619	0.956529	-0.470149	-0.449712
943	0.296252	0	2.35619	0.956437	-0.469872	-0.449403
944	0.296566	0	2.35619	0.956346	-0.469595	-0.449095
945	0.296881	0	2.35619	0.956254	-0.469317	-0.448787
946	0.297195	0	2.35619	0.956162	-0.46904	-0.448478
947	0.297509	0	2.35619	0.95607	-0.468763	-0.44817
948	0.297823	0	2.35619	0.955978	-0.468485	-0.447861
949	0.298137	0	2.35619	0.955885	-0.468207	-0.447553
950	0.298451	0	2.35619	0.955793	-0.46793	-0.447244
951	0.298765	0	2.35619	0.955701	-0.467652	-0.446935
952	0.29908	0	2.35619	0.955608	-0.467374	-0.446627
953	0.299394	0	2.35619	0.955515	-0.467097	-0.446318
954	0.299708	0	2.35619	0.955423	-0.466819	-0.446009
955	0.300022	0	2.35619	0.95533	-0.466541	-0.445701
956	0.300336	0	2.35619	0.955237	-0.466263	-0.445392
957	0.30065	0	2.35619	0.955144	-0.465985	-0.445083
958	0.300965	0	2.35619	0.955051	-0.465707	-0.444774
959	0.301279	0	2.35619	0.954958	-0.465429	-0.444465
960	0.301593	0	2.35619	0.954865	-0.465151	-0.444156
961	0.301907	0	2.35619	0.954771	-0.464873	-0.443847
962	0.302221	0	2.35619	0.954678	-0.464595	-0.443538
963	0.302535	0	2.35619	0.954584	-0.464317	-0.443229
964	0.30285	0	2.35619	0.954491	-0.464038	-0.44292
965	0.303164	0	2.35619	0.954397	-0.46376	-0.442611
966	0.303478	0	2.35619	0.954303	-0.463482	-0.442302
967	0.303792	0	2.35619	0.954209	-0.463203	-0.441993
968	0.304106	0	2.35619	0.954115	-0.462925	-0.441683
969	0.30442	0	2.35619	0.954021	-0.462646	-0.441374
970	0.304734	0	2.35619	0.953927	-0.462368	-0.441065
971	0.305049	0	2.35619	0.953832	-0.462089	-0.440756
972	0.305363	0	2.35619	0.953738	-0.461811	-0.440446
973	0.305677	0	2.35619	0.953643	-0.461532	-0.440137
974	0.305991	0	2.35619	0.953549	-0.461253	-0.439827
975	0.306305	0	2.35619	0.953454	-0.460974	-0.439518
976	0.306619	0	2.35619	0.953359	-0.460696	-0.439208
977	0.306934	0	2.35619	0.953265	-0.460417	-0.438899
978	0.307248	0	2.35619	0.95317	-0.460138	-0.438589
979	0.307562	0	2.35619	0.953074	-0.459859	-0.43828
980	0.307876	0	2.35619	0.952979	-0.45958	-0.43797
981	0.30819	0	2.35619	0.952884	-0.459301	-0.43766
982	0.308504	0	2.35619	0.952789	-0.459022	-0.437351
983	0.308819	0	2.35619	0.952693	-0.458743	-0.437041
984	0.309133	0	2.35619	0.952598	-0.458463	-0.436731
985	0.309447	0	2.35619	0.952502	-0.458184	-0.436421
986	0.309761	0	2.35619	0.952406	-0.457905	-0.436112
987	0.310075	0	2.35619	0.952311	-0.457626	-0.435802
988	0.310389	0	2.35619	0.952215	-0.457346	-0.435492
989	0.310704	0	2.35619	0.952119	-0.457067	-0.435182
990	0.311018	0	2.35619	0.952023	-0.456787	-0.434872
991	0.311332	0	2.35619	0.951926	-0.456508	-0.434562
992	0.311646	0	2.35619	0.95183	-0.456228	-0.434252
993	0.31196	0	2.35619	0.951734	-0.455949	-0.433942
994	0.312274	0	2.35619	0.951637	-0.455669	-0.433632
995	0.312588	0	2.35619	0.951541	-0.45539	-0.433322
996	0.312903	0	2.35619	0.951444	-0.45511	-0.433012
997	0.313217	0	2.35619	0.951347	-0.45483	-0.432701
998	0.313531	0	2.35619	0.95125	-0.45455	-0.432391
999	0.313845	0	2.35619	0.951154	-0.45427	-0.432081
1000	0.314159	0	2.35619	0.951057	-0.45399	-0.431771
1001	0.314473	0	2.35619	0.950959	-0.453711	-0.43146
1002	0.314788	0	2.35619	0.950862	-0.453431	-0.43115
1003	0.315102	0	2.35619	0.950765	-0.453151	-0.43084
1004	0.315416	0	2.35619	0.950667	-0.45287	-0.430529
1005	0.31573	0	2.35619	0.95057	-0.45259	-0.430219
1006	0.316044	0	2.35619	0.950472	-0.45231	-0.429908
1007	0.316358	0	2.35619	0.950375	-0.45203	-0.429598
1008	0.316673	0	2.35619	0.950277	-0.45175	-0.429287
1009	0.316987	0	2.35619	0.950179	-0.451469	-0.428977
1010	0.317301	0	2.35619	0.950081	-0.451189	-0.428666
1011	0.317615	0	2.35619	0.949983	-0.450909	-0.428356
1012	0.317929	0	2.35619	0.949885	-0.450628	-0.428045
1013	0.318243	0	2.35619	0.949787	-0.450348	-0.427734
1014	0.318557	0	2.35619	0.949688	-0.450067	-0.427424
1015	0.318872	0	2.35619	0.94959	-0.449787	-0.427113
1016	0.319186	0	2.35619	0.949491	-0.449506	-0.426802
1017	0.3195	0	2.35619	0.949393	-0.449225	-0.426491
1018	0.319814	0	2.35619	0.949294	-0.448945	-0.42618
1019	0.320128	0	2.35619	0.949195	-0.448664	-0.42587
1020	0.320442	0	2.35619	0.949096	-0.448383	-0.425559
1021	0.320757	0	2.35619	0.948997	-0.448102	-0.425248
1022	0.321071	0	2.35619	0.948898	-0.447822	-0.424937
1023	0.321385	0	2.35619	0.948799	-0.447541	-0.424626
1024	0.321699	0	2.35619	0.9487	-0.44726	-0.424315
1025	0.322013	0	2.35619	0.9486	-0.446979	-0.424004
1026	0.322327	0	2.35619	0.948501	-0.446698	-0.423693
1027	0.322642	0	2.35619	0.948401	-0.446416	-0.423382
1028	0.322956	0	2.35619	0.948302	-0.446135	-0.423071
1029	0.32327	0	2.35619	0.948202	-0.445854	-0.42276
1030	0.323584	0	2.35619	0.948102	-0.445573	-0.422449
1031	0.323898	0	2.35619	0.948002	-0.445292	-0.422137
1032	0.324212	0	2.35619	0.947902	-0.44501	-0.421826
1033	0.324527	0	2.35619	0.947802	-0.444729	-0.421515
1034	0.324841	0	2.35619	0.947702	-0.444448	-0.421204
1035	0.325155	0	2.35619	0.947601	-0.444166	-0.420892
1036	0.325469	0	2.35619	0.947501	-0.443885	-0.420581
1037	0.325783	0	2.35619	0.9474	-0.443603	-0.42027
1038	0.326097	0	2.35619	0.9473	-0.443322	-0.419958
1039	0.326411	0	2.35619	0.947199	-0.44304	-0.419647
1040	0.326726	0	2.35619	0.947098	-0.442758	-0.419336
1041	0.32704	0	2.35619	0.946997	-0.442477	-0.419024
1042	0.327354	0	2.35619	0.946896	-0.442195	-0.418713
1043	0.327668	0	2.35619	0.946795	-0.441913	-0.418401
1044	0.327982	0	2.35619	0.946694	-0.441631	-0.41809
1045	0.328296	0	2.35619	0.946593	-0.441349	-0.417778
1046	0.328611	0	2.35619	0.946492	-0.441067	-0.417467
1047	0.328925	0	2.35619	0.94639	-0.440785	-0.417155
1048	0.329239	0	2.35619	0.946289	-0.440503	-0.416843
1049	0.329553	0	2.35619	0.946187	-0.440221	-0.416532
1050	0.329867	0	2.35619	0.946085	-0.439939	-0.41622
1051	0.330181	0	2.35619	0.945984	-0.439657	-0.415908
1052	0.330496	0	2.35619	0.945882	-0.439375	-0.415597
1053	0.33081	0	2.35619	0.94578	-0.439093	-0.415285
1054	0.331124	0	2.35619	0.945678	-0.43881	-0.414973
1055	0.331438	0	2.35619	0.945575	-0.438528	-0.414661
1056	0.331752	0	2.35619	0.945473	-0.438246	-0.414349
1057	0.332066	0	2.35619	0.945371	-0.437963	-0.414038
1058	0.332381	0	2.35619	0.945268	-0.437681	-0.413726
1059	0.332695	0	2.35619	0.945166	-0.437398	-0.413414
1060	0.333009	0	2.35619	0.945063	-0.437116	-0.413102
1061	0.333323	0	2.35619	0.94496	-0.436833	-0.41279
1062	0.333637	0	2.35619	0.944857	-0.436551	-0.412478
1063	0.333951	0	2.35619	0.944755	-0.436268	-0.412166
1064	0.334265	0	2.35619	0.944652	-0.435985	-0.411854
1065	0.33458	0	2.35619	0.944548	-0.435702	-0.411542
1066	0.334894	0	2.35619	0.944445	-0.43542	-0.41123
1067	0.335208	0	2.35619	0.944342	-0.435137	-0.410918
1068	0.335522	0	2.35619	0.944239	-0.434854	-0.410606
1069	0.335836	0	2.35619	0.944135	-0.434571	-0.410294
1070	0.33615	0	2.35619	0.944031	-0.434288	-0.409982
1071	0.336465	0	2.35619	0.943928	-0.434005	-0.409669
1072	0.336779	0	2.35619	0.943824	-0.433722	-0.409357
1073	0.337093	0	2.35619	0.94372	-0.433439	-0.409045
1074	0.337407	0	2.35619	0.943616	-0.433156	-0.408733
1075	0.337721	0	2.35619	0.943512	-0.432873	-0.408421
1076	0.338035	0	2.35619	0.943408	-0.432589	-0.408108
1077	0.33835	0	2.35619	0.943304	-0.432306	-0.407796
1078	0.338664	0	2.35619	0.943199	-0.432023	-0.407484
1079	0.338978	0	2.35619	0.943095	-0.431739	-0.407171
1080	0.339292	0	2.35619	0.942991	-0.431456	-0.406859
1081	0.339606	0	2.35619	0.942886	-0.431173	-0.406547
1082	0.33992	0	2.35619	0.942781	-0.430889	-0.406234
1083	0.340234	0	2.35619	0.942676	-0.430606	-0.405922
1084	0.340549	0	2.35619	0.942572	-0.430322	-0.405609
1085	0.340863	0	2.35619	0.942467	-0.430038	-0.405297
1086	0.341177	0	2.35619	0.942362	-0.429755	-0.404984
1087	0.341491	0	2.35619	0.942256	-0.429471	-0.404672
1088	0.341805	0	2.35619	0.942151	-0.429187	-0.404359
1089	0.342119	0	2.35619	0.942046	-0.428904	-0.404047
1090	0.342434	0	2.35619	0.94194	-0.42862	-0.403734
1091	0.342748	0	2.35619	0.941835	-0.428336	-0.403422
1092	0.343062	0	2.35619	0.941729	-0.428052	-0.403109
1093	0.343376	0	2.35619	0.941623	-0.427768	-0.402796
1094	0.34369	0	2.35619	0.941518	-0.427484	-0.402484
1095	0.344004	0	2.35619	0.941412	-0.4272	-0.402171
1096	0.344319	0	2.35619	0.941306	-0.426916	-0.401858
1097	0.344633	0	2.35619	0.9412	-0.426632	-0.401546
1098	0.344947	0	2.35619	0.941093	-0.426348	-0.401233
1099	0.345261	0	2.35619	0.940987	-0.426064	-0.40092
1100	0.345575	0	2.35619	0.940881	-0.425779	-0.400608
1101	0.345889	0	2.35619	0.940774	-0.425495	-0.400295
1102	0.346204	0	2.35619	0.940668	-0.425211	-0.399982
1103	0.346518	0	2.35619	0.940561	-0.424926	-0.399669
1104	0.346832	0	2.35619	0.940454	-0.424642	-0.399356
1105	0.347146	0	2.35619	0.940348	-0.424357	-0.399043
1106	0.34746	0	2.35619	0.940241	-0.424073	-0.398731
1107	0.347774	0	2.35619	0.940134	-0.423788	-0.398418
1108	0.348088	0	2.35619	0.940026	-0.423504	-0.398105
1109	0.348403	0	2.35619	0.939919	-0.423219	-0.397792
1110	0.348717	0	2.35619	0.939812	-0.422935	-0.397479
1111	0.349031	0	2.35619	0.939705	-0.42265	-0.397166
1112	0.349345	0	2.35619	0.939597	-0.422365	-0.396853
1113	0.349659	0	2.35619	0.939489	-0.42208	-0.39654
1114	0.349973	0	2.35619	0.939382	-0.421796	-0.396227
1115	0.350288	0	2.35619	0.939274	-0.421511	-0.395914
1116	0.350602	0	2.35619	0.939166	-0.421226	-0.395601
1117	0.350916	0	2.35619	0.939058	-0.420941	-0.395288
1118	0.35123	0	2.35619	0.93895	-0.420656	-0.394975
1119	0.351544	0	2.35619	0.938842	-0.420371	-0.394662
1120	0.351858	0	2.35619	0.938734	-0.420086	-0.394349
1121	0.352173	0	2.35619	0.938626	-0.419801	-0.394036
1122	0.352487	0	2.35619	0.938517	-0.419515	-0.393722
1123	0.352801	0	2.35619	0.938409	-0.41923	-0.393409
1124	0.353115	0	2.35619	0.9383	-0.418945	-0.393096
1125	0.353429	0	2.35619	0.938191	-0.41866	-0.392783
1126	0.353743	0	2.35619	0.938083	-0.418374	-0.39247
1127	0.354057	0	2.35619	0.937974	-0.418089	-0.392157
1128	0.354372	0	2.35619	0.937865	-0.417804	-0.391843
1129	0.354686	0	2.35619	0.937756	-0.417518	-0.39153
1130	0.355	0	2.35619	0.937646	-0.417233	-0.391217
1131	0.355314	0	2.35619	0.937537	-0.416947	-0.390904
1132	0.355628	0	2.35619	0.937428	-0.416662	-0.39059
1133	0.355942	0	2.35619	0.937318	-0.416376	-0.390277
1134	0.356257	0	2.35619	0.937209	-0.41609	-0.389964
1135	0.356571	0	2.35619	0.937099	-0.415805	-0.38965
1136	0.356885	0	2.35619	0.93699	-0.415519	-0.389337
1137	0.357199	0	2.35619	0.93688	-0.415233	-0.389024
1138	0.357513	0	2.35619	0.93677	-0.414947	-0.38871
1139	0.357827	0	2.35619	0.93666	-0.414661	-0.388397
1140	0.358142	0	2.35619	0.93655	-0.414376	-0.388083
1141	0.358456	0	2.35619	0.93644	-0.41409	-0.38777
1142	0.35877	0	2.35619	0.936329	-0.413804	-0.387457
1143	0.359084	0	2.35619	0.936219	-0.413518	-0.387143
1144	0.359398	0	2.35619	0.936109	-0.413232	-0.38683
1145	0.359712	0	2.35619	0.935998	-0.412945	-0.386516
1146	0.360027	0	2.35619	0.935887	-0.412659	-0.386203
1147	0.360341	0	2.35619	0.935777	-0.412373	-0.385889
1148	0.360655	0	2.35619	0.935666	-0.412087	-0.385576
1149	0.360969	0	2.35619	0.935555	-0.411801	-0.385262
1150	0.361283	0	2.35619	0.935444	-0.411514	-0.384949
1151	0.361597	0	2.35619	0.935333	-0.411228	-0.384635
1152	0.361911	0	2.35619	0.935222	-0.410942	-0.384322
1153	0.362226	0	2.35619	0.93511	-0.410655	-0.384008
1154	0.36254	0	2.35619	0.934999	-0.410369	-0.383694
1155	0.362854	0	2.35619	0.934888	-0.410082	-0.383381
1156	0.363168	0	2.35619	0.934776	-0.409796	-0.383067
1157	0.363482	0	2.35619	0.934664	-0.409509	-0.382754
1158	0.363796	0	2.35619	0.934553	-0.409222	-0.38244
1159	0.364111	0	2.35619	0.934441	-0.408936	-0.382126
1160	0.364425	0	2.35619	0.934329	-0.408649	-0.381813
1161	0.364739	0	2.35619	0.934217	-0.408362	-0.381499
1162	0.365053	0	2.35619	0.934105	-0.408076	-0.381185
1163	0.365367	0	2.35619	0.933993	-0.407789	-0.380872
1164	0.365681	0	2.35619	0.93388	-0.407502	-0.380558
1165	0.365996	0	2.35619	0.933768	-0.407215	-0.380244
1166	0.36631	0	2.35619	0.933655	-0.406928	-0.379931
1167	0.366624	0	2.35619	0.933543	-0.406641	-0.379617
1168	0.366938	0	2.35619	0.93343	-0.406354	-0.379303
1169	0.367252	0	2.35619	0.933317	-0.406067	-0.378989
1170	0.367566	0	2.35619	0.933205	-0.40578	-0.378676
1171	0.36788	0	2.35619	0.933092	-0.405493	-0.378362
1172	0.368195	0	2.35619	0.932979	-0.405205	-0.378048
1173	0.368509	0	2.35619	0.932866	-0.404918	-0.377734
1174	0.368823	0	2.35619	0.932752	-0.404631	-0.37742
1175	0.369137	0	2.35619	0.932639	-0.404344	-0.377107
1176	0.369451	0	2.35619	0.932526	-0.404056	-0.376793
1177	0.369765	0	2.35619	0.932412	-0.403769	-0.376479
1178	0.37008	0	2.35619	0.932299	-0.403481	-0.376165
1179	0.370394	0	2.35619	0.932185	-0.403194	-0.375851
1180	0.370708	0	2.35619	0.932071	-0.402906	-0.375537
1181	0.371022	0	2.35619	0.931957	-0.402619	-0.375224
1182	0.371336	0	2.35619	0.931843	-0.402331	-0.37491
1183	0.37165	0	2.35619	0.931729	-0.402044	-0.374596
1184	0.371965	0	2.35619	0.931615	-0.401756	-0.374282
1185	0.372279	0	2.35619	0.931501	-0.401468	-0.373968
1186	0.372593	0	2.35619	0.931387	-0.401181	-0.373654
1187	0.372907	0	2.35619	0.931272	-0.400893	-0.37334
1188	0.373221	0	2.35619	0.931158	-0.400605	-0.373026
1189	0.373535	0	2.35619	0.931043	-0.400317	-0.372712
1190	0.37385	0	2.35619	0.930928	-0.400029	-0.372398
1191	0.374164	0	2.35619	0.930814	-0.399741	-0.372085
1192	0.374478	0	2.35619	0.930699	-0.399453	-0.371771
1193	0.374792	0	2.35619	0.930584	-0.399165	-0.371457
1194	0.375106	0	2.35619	0.930469	-0.398877	-0.371143
1195	0.37542	0	2.35619	0.930354	-0.398589	-0.370829
1196	0.375734	0	2.35619	0.930238	-0.398301	-0.370515
1197	0.376049	0	2.35619	0.930123	-0.398013	-0.370201
1198	0.376363	0	2.35619	0.930008	-0.397724	-0.369887
1199	0.376677	0	2.35619	0.929892	-0.397436	-0.369573
1200	0.376991	0	2.35619	0.929776	-0.397148	-0.369259
1201	0.377305	0	2.35619	0.929661	-0.39686	-0.368945
1202	0.377619	0	2.35619	0.929545	-0.396571	-0.368631
1203	0.377934	0	2.35619	0.929429	-0.396283	-0.368317
1204	0.378248	0	2.35619	0.929313	-0.395994	-0.368003
1205	0.378562	0	2.35619	0.929197	-0.395706	-0.367689
1206	0.378876	0	2.35619	0.929081	-0.395417	-0.367375
1207	0.37919	0	2.35619	0.928965	-0.395129	-0.367061
1208	0.379504	0	2.35619	0.928848	-0.39484	-0.366747
1209	0.379819	0	2.35619	0.928732	-0.394551	-0.366432
1210	0.380133	0	2.35619	0.928615	-0.394263	-0.366118
1211	0.380447	0	2.35619	0.928499	-0.393974	-0.365804
1212	0.380761	0	2.35619	0.928382	-0.393685	-0.36549
1213	0.381075	0	2.35619	0.928265	-0.393396	-0.365176
1214	0.381389	0	2.35619	0.928148	-0.393108	-0.364862
1215	0.381704	0	2.35619	0.928031	-0.392819	-0.364548
1216	0.382018	0	2.35619	0.927914	-0.39253	-0.364234
1217	0.382332	0	2.35619	0.927797	-0.392241	-0.36392
1218	0.382646	0	2.35619	0.92768	-0.391952	-0.363606
1219	0.38296	0	2.35619	0.927563	-0.391663	-0.363292
1220	0.383274	0	2.35619	0.927445	-0.391374	-0.362978
1221	0.383588	0	2.35619	0.927328	-0.391085	-0.362664
1222	0.383903	0	2.35619	0.92721	-0.390795	-0.362349
1223	0.384217	0	2.35619	0.927092	-0.390506	-0.362035
1224	0.384531	0	2.35619	0.926974	-0.390217	-0.361721
1225	0.384845	0	2.35619	0.926857	-0.389928	-0.361407
1226	0.385159	0	2.35619	0.926739	-0.389638	-0.361093
1227	0.385473	0	2.35619	0.926621	-0.389349	-0.360779
1228	0.385788	0	2.35619	0.926502	-0.38906	-0.360465
1229	0.386102	0	2.35619	0.926384	-0.38877	-0.360151
1230	0.386416	0	2.35619	0.926266	-0.388481	-0.359836
1231	0.38673	0	2.35619	0.926147	-0.388191	-0.359522
1232	0.387044	0	2.35619	0.926029	-0.387902	-0.359208
1233	0.387358	0	2.35619	0.92591	-0.387612	-0.358894
1234	0.387673	0	2.35619	0.925791	-0.387323	-0.35858
1235	0.387987	0	2.35619	0.925673	-0.387033	-0.358266
1236	0.388301	0	2.35619	0.925554	-0.386743	-0.357952
1237	0.388615	0	2.35619	0.925435	-0.386453	-0.357637
1238	0.388929	0	2.35619	0.925316	-0.386164	-0.357323
1239	0.389243	0	2.35619	0.925196	-0.385874	-0.357009
1240	0.389557	0	2.35619	0.925077	-0.385584	-0.356695
1241	0.389872	0	2.35619	0.924958	-0.385294	-0.356381
1242	0.390186	0	2.35619	0.924838	-0.385004	-0.356067
1243	0.3905	0	2.35619	0.924719	-0.384714	-0.355752
1244	0.390814	0	2.35619	0.924599	-0.384424	-0.355438
1245	0.391128	0	2.35619	0.92448	-0.384134	-0.355124
1246	0.391442	0	2.35619	0.92436	-0.383844	-0.35481
1247	0.391757	0	2.35619	0.92424	-0.383554	-0.354496
1248	0.392071	0	2.35619	0.92412	-0.383264	-0.354182
1249	0.392385	0	2.35619	0.924	-0.382974	-0.353868
1250	0.392699	0	2.35619	0.92388	-0.382683	-0.353553
1251	0.393013	0	2.35619	0.923759	-0.382393	-0.353239
1252	0.393327	0	2.35619	0.923639	-0.382103	-0.352925
1253	0.393642	0	2.35619	0.923518	-0.381813	-0.352611
1254	0.393956	0	2.35619	0.923398	-0.381522	-0.352297
1255	0.39427	0	2.35619	0.923277	-0.381232	-0.351983
1256	0.394584	0	2.35619	0.923157	-0.380941	-0.351668
1257	0.394898	0	2.35619	0.923036	-0.380651	-0.351354
1258	0.395212	0	2.35619	0.922915	-0.38036	-0.35104
1259	0.395527	0	2.35619	0.922794	-0.38007	-0.350726
1260	0.395841	0	2.35619	0.922673	-0.379779	-0.350412
1261	0.396155	0	2.35619	0.922552	-0.379488	-0.350098
1262	0.396469	0	2.35619	0.92243	-0.379198	-0.349784
1263	0.396783	0	2.35619	0.922309	-0.378907	-0.349469
1264	0.397097	0	2.35619	0.922187	-0.378616	-0.349155
1265	0.397411	0	2.35619	0.922066	-0.378326	-0.348841
1266	0.397726	0	2.35619	0.921944	-0.378035	-0.348527
1267	0.39804	0	2.35619	0.921823	-0.377744	-0.348213
1268	0.398354	0	2.35619	0.921701	-0.377453	-0.347899
1269	0.398668	0	2.35619	0.921579	-0.377162	-0.347585
1270	0.398982	0	2.35619	0.921457	-0.376871	-0.34727
1271	0.399296	0	2.35619	0.921335	-0.37658	-0.346956
1272	0.399611	0	2.35619	0.921213	-0.376289	-0.346642
1273	0.399925	0	2.35619	0.92109	-0.375998	-0.346328
1274	0.400239	0	2.35619	0.920968	-0.375707	-0.346014
1275	0.400553	0	2.35619	0.920845	-0.375416	-0.3457
1276	0.400867	0	2.35619	0.920723	-0.375124	-0.345386
1277	0.401181	0	2.35619	0.9206	-0.374833	-0.345071
1278	0.401496	0	2.35619	0.920478	-0.374542	-0.344757
1279	0.40181	0	2.35619	0.920355	-0.374251	-0.344443
1280	0.402124	0	2.35619	0.920232	-0.373959	-0.344129
1281	0.402438	0	2.35619	0.920109	-0.373668	-0.343815
1282	0.402752	0	2.35619	0.919986	-0.373376	-0.343501
1283	0.403066	0	2.35619	0.919863	-0.373085	-0.343187
1284	0.40338	0	2.35619	0.919739	-0.372793	-0.342873
1285	0.403695	0	2.35619	0.919616	-0.372502	-0.342559
1286	0.404009	0	2.35619	0.919492	-0.37221	-0.342245
1287	0.404323	0	2.35619	0.919369	-0.371919	-0.341931
1288	0.404637	0	2.35619	0.919245	-0.371627	-0.341616
1289	0.404951	0	2.35619	0.919122	-0.371335	-0.341302
1290	0.405265	0	2.35619	0.918998	-0.371044	-0.340988
1291	0.40558	0	2.35619	0.918874	-0.370752	-0.340674
1292	0.405894	0	2.35619	0.91875	-0.37046	-0.34036
1293	0.406208	0	2.35619	0.918626	-0.370168	-0.340046
1294	0.406522	0	2.35619	0.918502	-0.369876	-0.339732
1295	0.406836	0	2.35619	0.918377	-0.369585	-0.339418
1296	0.40715	0	2.35619	0.918253	-0.369293	-0.339104
1297	0.407465	0	2.35619	0.918129	-0.369001	-0.33879
1298	0.407779	0	2.35619	0.918004	-0.368709	-0.338476
1299	0.408093	0	2.35619	0.917879	-0.368417	-0.338162
1300	0.408407	0	2.35619	0.917755	-0.368125	-0.337848
1301	0.408721	0	2.35619	0.91763	-0.367832	-0.337534
1302	0.409035	0	2.35619	0.917505	-0.36754	-0.33722
1303	0.40935	0	2.35619	0.91738	-0.367248	-0.336906
1304	0.409664	0	2.35619	0.917255	-0.366956	-0.336592
1305	0.409978	0	2.35619	0.91713	-0.366664	-0.336278
1306	0.410292	0	2.35619	0.917004	-0.366371	-0.335964
1307	0.410606	0	2.35619	0.916879	-0.366079	-0.33565
1308	0.41092	0	2.35619	0.916754	-0.365787	-0.335336
1309	0.411234	0	2.35619	0.916628	-0.365494	-0.335022
1310	0.411549	0	2.35619	0.916502	-0.365202	-0.334708
1311	0.411863	0	2.35619	0.916377	-0.364909	-0.334394
1312	0.412177	0	2.35619	0.916251	-0.364617	-0.33408
1313	0.412491	0	2.35619	0.916125	-0.364324	-0.333767
1314	0.412805	0	2.35619	0.915999	-0.364032	-0.333453
1315	0.413119	0	2.35619	0.915873	-0.363739	-0.333139
1316	0.413434	0	2.35619	0.915747	-0.363446	-0.332825
1317	0.413748	0	2.35619	0.91562	-0.363154	-0.332511
1318	0.414062	0	2.35619	0.915494	-0.362861	-0.332197
1319	0.414376	0	2.35619	0.915368	-0.362568	-0.331883
1320	0.41469	0	2.35619	0.915241	-0.362275	-0.331569
1321	0.415004	0	2.35619	0.915115	-0.361983	-0.331255
1322	0.415319	0	2.35619	0.914988	-0.36169	-0.330942
1323	0.415633	0	2.35619	0.914861	-0.361397	-0.330628
1324	0.415947	0	2.35619	0.914734	-0.361104	-0.330314
1325	0.416261	0	2.35619	0.914607	-0.360811	-0.33
1326	0.416575	0	2.35619	0.91448	-0.360518	-0.329686
1327	0.416889	0	2.35619	0.914353	-0.360225	-0.329373
1328	0.417204	0	2.35619	0.914226	-0.359932	-0.329059
1329	0.417518	0	2.35619	0.914098	-0.359639	-0.328745
1330	0.417832	0	2.35619	0.913971	-0.359345	-0.328431
1331	0.418146	0	2.35619	0.913843	-0.359052	-0.328117
1332	0.41846	0	2.35619	0.913716	-0.358759	-0.327804
1333	0.418774	0	2.35619	0.913588	-0.358466	-0.32749
1334	0.419088	0	2.35619	0.91346	-0.358172	-0.327176
1335	0.419403	0	2.35619	0.913332	-0.357879	-0.326863
1336	0.419717	0	2.35619	0.913204	-0.357586	-0.326549
1337	0.420031	0	2.35619	0.913076	-0.357292	-0.326235
1338	0.420345	0	2.35619	0.912948	-0.356999	-0.325921
1339	0.420659	0	2.35619	0.91282	-0.356705	-0.325608
1340	0.420973	0	2.35619	0.912692	-0.356412	-0.325294
1341	0.421288	0	2.35619	0.912563	-0.356118	-0.32498
1342	0.421602	0	2.35619	0.912435	-0.355825	-0.324667
1343	0.421916	0	2.35619	0.912306	-0.355531	-0.324353
1344	0.42223	0	2.35619	0.912177	-0.355237	-0.32404
1345	0.422544	0	2.35619	0.912049	-0.354944	-0.323726
1346	0.422858	0	2.35619	0.91192	-0.35465	-0.323412
1347	0.423173	0	2.35619	0.911791	-0.354356	-0.323099
1348	0.423487	0	2.35619	0.911662	-0.354063	-0.322785
1349	0.423801	0	2.35619	0.911533	-0.353769	-0.322472
1350	0.424115	0	2.35619	0.911403	-0.353475	-0.322158
1351	0.424429	0	2.35619	0.911274	-0.353181	-0.321845
1352	0.424743	0	2.35619	0.911145	-0.352887	-0.321531
1353	0.425057	0	2.35619	0.911015	-0.352593	-0.321218
1354	0.425372	0	2.35619	0.910885	-0.352299	-0.320904
1355	0.425686	0	2.35619	0.910756	-0.352005	-0.320591
1356	0.426	0	2.35619	0.910626	-0.351711	-0.320277
1357	0.426314	0	2.35619	0.910496	-0.351417	-0.319964
1358	0.426628	0	2.35619	0.910366	-0.351123	-0.31965
1359	0.426942	0	2.35619	0.910236	-0.350829	-0.319337
1360	0.427257	0	2.35619	0.910106	-0.350534	-0.319023
1361	0.427571	0	2.35619	0.909976	-0.35024	-0.31871
1362	0.427885	0	2.35619	0.909845	-0.349946	-0.318397
1363	0.428199	0	2.35619	0.909715	-0.349651	-0.318083
1364	0.428513	0	2.35619	0.909585	-0.349357	-0.31777
1365	0.428827	0	2.35619	0.909454	-0.349063	-0.317457
1366	0.429142	0	2.35619	0.909323	-0.348768	-0.317143
1367	0.429456	0	2.35619	0.909193	-0.348474	-0.31683
1368	0.42977	0	2.35619	0.909062	-0.348179	-0.316517
1369	0.430084	0	2.35619	0.908931	-0.347885	-0.316203
1370	0.430398	0	2.35619	0.9088	-0.34759	-0.31589
1371	0.430712	0	2.35619	0.908669	-0.347296	-0.315577
1372	0.431027	0	2.35619	0.908537	-0.347001	-0.315263
1373	0.431341	0	2.35619	0.908406	-0.346706	-0.31495
1374	0.431655	0	2.35619	0.908275	-0.346412	-0.314637
1375	0.431969	0	2.35619	0.908143	-0.346117	-0.314324
1376	0.432283	0	2.35619	0.908012	-0.345822	-0.314011
1377	0.432597	0	2.35619	0.90788	-0.345528	-0.313697
1378	0.432911	0	2.35619	0.907748	-0.345233	-0.313384
1379	0.433226	0	2.35619	0.907616	-0.344938	-0.313071
1380	0.43354	0	2.35619	0.907484	-0.344643	-0.312758
1381	0.433854	0	2.35619	0.907352	-0.344348	-0.312445
1382	0.434168	0	2.35619	0.90722	-0.344053	-0.312132
1383	0.434482	0	2.35619	0.907088	-0.343758	-0.311819
1384	0.434796	0	2.35619	0.906956	-0.343463	-0.311506
1385	0.435111	0	2.35619	0.906823	-0.343168	-0.311193
1386	0.435425	0	2.35619	0.906691	-0.342873	-0.31088
1387	0.435739	0	2.35619	0.906558	-0.342578	-0.310567
1388	0.436053	0	2.35619	0.906426	-0.342283	-0.310254
1389	0.436367	0	2.35619	0.906293	-0.341987	-0.309941
1390	0.436681	0	2.35619	0.90616	-0.341692	-0.309628
1391	0.436996	0	2.35619	0.906027	-0.341397	-0.309315
1392	0.43731	0	2.35619	0.905894	-0.341102	-0.309002
1393	0.437624	0	2.35619	0.905761	-0.340806	-0.308689
1394	0.437938	0	2.35619	0.905628	-0.340511	-0.308376
1395	0.438252	0	2.35619	0.905495	-0.340215	-0.308063
1396	0.438566	0	2.35619	0.905361	-0.33992	-0.30775
1397	0.43888	0	2.35619	0.905228	-0.339625	-0.307438
1398	0.439195	0	2.35619	0.905094	-0.339329	-0.307125
1399	0.439509	0	2.35619	0.904961	-0.339033	-0.306812
1400	0.439823	0	2.35619	0.904827	-0.338738	-0.306499
1401	0.440137	0	2.35619	0.904693	-0.338442	-0.306186
1402	0.440451	0	2.35619	0.904559	-0.338147	-0.305874
1403	0.440765	0	2.35619	0.904425	-0.337851	-0.305561
1404	0.44108	0	2.35619	0.904291	-0.337555	-0.305248
1405	0.441394	0	2.35619	0.904157	-0.33726	-0.304936
1406	0.441708	0	2.35619	0.904023	-0.336964	-0.304623
1407	0.442022	0	2.35619	0.903889	-0.336668	-0.30431
1408	0.442336	0	2.35619	0.903754	-0.336372	-0.303998
1409	0.44265	0	2.35619	0.90362	-0.336076	-0.303685
1410	0.442965	0	2.35619	0.903485	-0.33578	-0.303373
1411	0.443279	0	2.35619	0.90335	-0.335484	-0.30306
1412	0.443593	0	2.35619	0.903215	-0.335188	-0.302747
1413	0.443907	0	2.35619	0.903081	-0.334892	-0.302435
1414	0.444221	0	2.35619	0.902946	-0.334596	-0.302122
1415	0.444535	0	2.35619	0.902811	-0.3343	-0.30181
1416	0.44485	0	2.35619	0.902675	-0.334004	-0.301497
1417	0.445164	0	2.35619	0.90254	-0.333708	-0.301185
1418	0.445478	0	2.35619	0.902405	-0.333412	-0.300873
1419	0.445792	0	2.35619	0.902269	-0.333116	-0.30056
1420	0.446106	0	2.35619	0.902134	-0.33282	-0.300248
1421	0.44642	0	2.35619	0.901998	-0.332523	-0.299935
1422	0.446734	0	2.35619	0.901863	-0.332227	-0.299623
1423	0.447049	0	2.35619	0.901727	-0.331931	-0.299311
1424	0.447363	0	2.35619	0.901591	-0.331634	-0.298999
1425	0.447677	0	2.35619	0.901455	-0.331338	-0.298686
1426	0.447991	0	2.35619	0.901319	-0.331041	-0.298374
1427	0.448305	0	2.35619	0.901183	-0.330745	-0.298062
1428	0.448619	0	2.35619	0.901047	-0.330449	-0.29775
1429	0.448934	0	2.35619	0.90091	-0.330152	-0.297437
1430	0.449248	0	2.35619	0.900774	-0.329855	-0.297125
1431	0.449562	0	2.35619	0.900638	-0.329559	-0.296813
1432	0.449876	0	2.35619	0.900501	-0.329262	-0.296501
1433	0.45019	0	2.35619	0.900364	-0.328966	-0.296189
1434	0.450504	0	2.35619	0.900228	-0.328669	-0.295877
1435	0.450819	0	2.35619	0.900091	-0.328372	-0.295565
1436	0.451133	0	2.35619	0.899954	-0.328075	-0.295253
1437	0.451447	0	2.35619	0.899817	-0.327779	-0.294941
1438	0.451761	0	2.35619	0.89968	-0.327482	-0.294629
1439	0.452075	0	2.35619	0.899543	-0.327185	-0.294317
1440	0.452389	0	2.35619	0.899405	-0.326888	-0.294005
1441	0.452704	0	2.35619	0.899268	-0.326591	-0.293693
1442	0.453018	0	2.35619	0.89913	-0.326294	-0.293381
1443	0.453332	0	2.35619	0.898993	-0.325997	-0.293069
1444	0.453646	0	2.35619	0.898855	-0.3257	-0.292757
1445	0.45396	0	2.35619	0.898718	-0.325403	-0.292445
1446	0.454274	0	2.35619	0.89858	-0.325106	-0.292134
1447	0.454588	0	2.35619	0.898442	-0.324809	-0.291822
1448	0.454903	0	2.35619	0.898304	-0.324512	-0.29151
1449	0.455217	0	2.35619	0.898166	-0.324215	-0.291198
1450	0.455531	0	2.35619	0.898028	-0.323917	-0.290887
1451	0.455845	0	2.35619	0.897889	-0.32362	-0.290575
1452	0.456159	0	2.35619	0.897751	-0.323323	-0.290263
1453	0.456473	0	2.35619	0.897613	-0.323026	-0.289952
1454	0.456788	0	2.35619	0.897474	-0.322728	-0.28964
1455	0.457102	0	2.35619	0.897335	-0.322431	-0.289329
1456	0.457416	0	2.35619	0.897197	-0.322134	-0.289017
1457	0.45773	0	2.35619	0.897058	-0.321836	-0.288706
1458	0.458044	0	2.35619	0.896919	-0.321539	-0.288394
1459	0.458358	0	2.35619	0.89678	-0.321241	-0.288083
1460	0.458673	0	2.35619	0.896641	-0.320944	-0.287771
1461	0.458987	0	2.35619	0.896502	-0.320646	-0.28746
1462	0.459301	0	2.35619	0.896363	-0.320348	-0.287148
1463	0.459615	0	2.35619	0.896223	-0.320051	-0.286837
1464	0.459929	0	2.35619	0.896084	-0.319753	-0.286526
1465	0.460243	0	2.35619	0.895944	-0.319456	-0.286214
1466	0.460557	0	2.35619	0.895805	-0.319158	-0.285903
1467	0.460872	0	2.35619	0.895665	-0.31886	-0.285592
1468	0.461186	0	2.35619	0.895525	-0.318562	-0.285281
1469	0.4615	0	2.35619	0.895386	-0.318264	-0.284969
1470	0.461814	0	2.35619	0.895246	-0.317967	-0.284658
1471	0.462128	0	2.35619	0.895106	-0.317669	-0.284347
1472	0.462442	0	2.35619	0.894966	-0.317371	-0.284036
1473	0.462757	0	2.35619	0.894825	-0.317073	-0.283725
1474	0.463071	0	2.35619	0.894685	-0.316775	-0.283414
1475	0.463385	0	2.35619	0.894545	-0.316477	-0.283103
1476	0.463699	0	2.35619	0.894404	-0.316179	-0.282792
1477	0.464013	0	2.35619	0.894264	-0.315881	-0.282481
1478	0.464327	0	2.35619	0.894123	-0.315583	-0.28217
1479	0.464642	0	2.35619	0.893982	-0.315285	-0.281859
1480	0.464956	0	2.35619	0.893841	-0.314987	-0.281548
1481	0.46527	0	2.35619	0.893701	-0.314688	-0.281237
1482	0.465584	0	2.35619	0.89356	-0.31439	-0.280926
1483	0.465898	0	2.35619	0.893418	-0.314092	-0.280615
1484	0.466212	0	2.35619	0.893277	-0.313794	-0.280305
1485	0.466527	0	2.35619	0.893136	-0.313495	-0.279994
1486	0.466841	0	2.35619	0.892995	-0.313197	-0.279683
1487	0.467155	0	2.35619	0.892853	-0.312899	-0.279373
1488	0.467469	0	2.35619	0.892712	-0.3126	-0.279062
1489	0.467783	0	2.35619	0.89257	-0.312302	-0.278751
1490	0.468097	0	2.35619	0.892428	-0.312003	-0.278441
1491	0.468411	0	2.35619	0.892287	-0.311705	-0.27813
1492	0.468726	0	2.35619	0.892145	-0.311406	-0.277819
1493	0.46904	0	2.35619	0.892003	-0.311108	-0.277509
1494	0.469354	0	2.35619	0.891861	-0.310809	-0.277198
1495	0.469668	0	2.35619	0.891719	-0.310511	-0.276888
1496	0.469982	0	2.35619	0.891576	-0.310212	-0.276578
1497	0.470296	0	2.35619	0.891434	-0.309913	-0.276267
1498	0.470611	0	2.35619	0.891292	-0.309614	-0.275957
1499	0.470925	0	2.35619	0.891149	-0.309316	-0.275646
1500	0.471239	0	2.35619	0.891007	-0.309017	-0.275336
1501	0.471553	0	2.35619	0.890864	-0.308718	-0.275026
1502	0.471867	0	2.35619	0.890721	-0.308419	-0.274716
1503	0.472181	0	2.35619	0.890578	-0.308121	-0.274405
1504	0.472496	0	2.35619	0.890435	-0.307822	-0.274095
1505	0.47281	0	2.35619	0.890292	-0.307523	-0.273785
1506	0.473124	0	2.35619	0.890149	-0.307224	-0.273475
1507	0.473438	0	2.35619	0.890006	-0.306925	-0.273165
1508	0.473752	0	2.35619	0.889863	-0.306626	-0.272855
1509	0.474066	0	2.35619	0.889719	-0.306327	-0.272545
1510	0.47438	0	2.35619	0.889576	-0.306028	-0.272235
1511	0.474695	0	2.35619	0.889432	-0.305729	-0.271925
1512	0.475009	0	2.35619	0.889289	-0.305429	-0.271615
1513	0.475323	0	2.35619	0.889145	-0.30513	-0.271305
1514	0.475637	0	2.35619	0.889001	-0.304831	-0.270995
1515	0.475951	0	2.35619	0.888857	-0.304532	-0.270685
1516	0.476265	0	2.35619	0.888713	-0.304233	-0.270376
1517	0.47658	0	2.35619	0.888569	-0.303933	-0.270066
1518	0.476894	0	2.35619	0.888425	-0.303634	-0.269756
1519	0.477208	0	2.35619	0.888281	-0.303335	-0.269446
1520	0.477522	0	2.35619	0.888136	-0.303035	-0.269137
1521	0.477836	0	2.35619	0.887992	-0.302736	-0.268827
1522	0.47815	0	2.35619	0.887848	-0.302436	-0.268517
1523	0.478465	0	2.35619	0.887703	-0.302137	-0.268208
1524	0.478779	0	2.35619	0.887558	-0.301837	-0.267898
1525	0.479093	0	2.35619	0.887413	-0.301538	-0.267589
1526	0.479407	0	2.35619	0.887269	-0.301238	-0.267279
1527	0.479721	0	2.35619	0.887124	-0.300939	-0.26697
1528	0.480035	0	2.35619	0.886979	-0.300639	-0.266661
1529	0.48035	0	2.35619	0.886833	-0.30034	-0.266351
1530	0.480664	0	2.35619	0.886688	-0.30004	-0.266042
1531	0.480978	0	2.35619	0.886543	-0.29974	-0.265733
1532	0.481292	0	2.35619	0.886398	-0.29944	-0.265423
1533	0.481606	0	2.35619	0.886252	-0.299141	-0.265114
1534	0.48192	0	2.35619	0.886107	-0.298841	-0.264805
1535	0.482234	0	2.35619	0.885961	-0.298541	-0.264496
1536	0.482549	0	2.35619	0.885815	-0.298241	-0.264187
1537	0.482863	0	2.35619	0.885669	-0.297941	-0.263878
1538	0.483177	0	2.35619	0.885523	-0.297641	-0.263568
1539	0.483491	0	2.35619	0.885377	-0.297342	-0.263259
1540	0.483805	0	2.35619	0.885231	-0.297042	-0.262951
1541	0.484119	0	2.35619	0.885085	-0.296742	-0.262642
1542	0.484434	0	2.35619	0.884939	-0.296442	-0.262333
1543	0.484748	0	2.35619	0.884793	-0.296142	-0.262024
1544	0.485062	0	2.35619	0.884646	-0.295841	-0.261715
1545	0.485376	0	2.35619	0.8845	-0.295541	-0.261406
1546	0.48569	0	2.35619	0.884353	-0.295241	-0.261097
1547	0.486004	0	2.35619	0.884206	-0.294941	-0.260789
1548	0.486319	0	2.35619	0.884059	-0.294641	-0.26048
1549	0.486633	0	2.35619	0.883913	-0.294341	-0.260171
1550	0.486947	0	2.35619	0.883766	-0.29404	-0.259863
1551	0.487261	0	2.35619	0.883619	-0.29374	-0.259554
1552	0.487575	0	2.35619	0.883471	-0.29344	-0.259246
1553	0.487889	0	2.35619	0.883324	-0.293139	-0.258937
1554	0.488203	0	2.35619	0.883177	-0.292839	-0.258629
1555	0.488518	0	2.35619	0.88303	-0.292539	-0.25832
1556	0.488832	0	2.35619	0.882882	-0.292238	-0.258012
1557	0.489146	0	2.35619	0.882734	-0.291938	-0.257703
1558	0.48946	0	2.35619	0.882587	-0.291637	-0.257395
1559	0.489774	0	2.35619	0.882439	-0.291337	-0.257087
1560	0.490088	0	2.35619	0.882291	-0.291036	-0.256779
1561	0.490403	0	2.35619	0.882143	-0.290736	-0.25647
1562	0.490717	0	2.35619	0.881995	-0.290435	-0.256162
1563	0.491031	0	2.35619	0.881847	-0.290134	-0.255854
1564	0.491345	0	2.35619	0.881699	-0.289834	-0.255546
1565	0.491659	0	2.35619	0.881551	-0.289533	-0.255238
1566	0.491973	0	2.35619	0.881402	-0.289232	-0.25493
1567	0.492288	0	2.35619	0.881254	-0.288932	-0.254622
1568	0.492602	0	2.35619	0.881105	-0.288631	-0.254314
1569	0.492916	0	2.35619	0.880957	-0.28833	-0.254006
1570	0.49323	0	2.35619	0.880808	-0.288029	-0.253698
1571	0.493544	0	2.35619	0.880659	-0.287728	-0.253391
1572	0.493858	0	2.35619	0.88051	-0.287427	-0.253083
1573	0.494173	0	2.35619	0.880361	-0.287126	-0.252775
1574	0.494487	0	2.35619	0.880212	-0.286826	-0.252467
1575	0.494801	0	2.35619	0.880063	-0.286525	-0.25216
1576	0.495115	0	2.35619	0.879914	-0.286224	-0.251852
1577	0.495429	0	2.35619	0.879765	-0.285923	-0.251545
1578	0.495743	0	2.35619	0.879615	-0.285621	-0.251237
1579	0.496057	0	2.35619	0.879466	-0.28532	-0.25093
1580	0.496372	0	2.35619	0.879316	-0.285019	-0.250622
1581	0.496686	0	2.35619	0.879167	-0.284718	-0.250315
1582	0.497	0	2.35619	0.879017	-0.284417	-0.250007
1583	0.497314	0	2.35619	0.878867	-0.284116	-0.2497
1584	0.497628	0	2.35619	0.878717	-0.283815	-0.249393
1585	0.497942	0	2.35619	0.878567	-0.283513	-0.249085
1586	0.498257	0	2.35619	0.878417	-0.283212	-0.248778
1587	0.498571	0	2.35619	0.878267	-0.282911	-0.248471
1588	0.498885	0	2.35619	0.878117	-0.282609	-0.248164
1589	0.499199	0	2.35619	0.877966	-0.282308	-0.247857
1590	0.499513	0	2.35619	0.877816	-0.282007	-0.24755
1591	0.499827	0	2.35619	0.877665	-0.281705	-0.247243
1592	0.500142	0	2.35619	0.877515	-0.281404	-0.246936
1593	0.500456	0	2.35619	0.877364	-0.281102	-0.246629
1594	0.50077	0	2.35619	0.877213	-0.280801	-0.246322
1595	0.501084	0	2.35619	0.877062	-0.280499	-0.246015
1596	0.501398	0	2.35619	0.876911	-0.280198	-0.245708
1597	0.501712	0	2.35619	0.87676	-0.279896	-0.245402
1598	0.502027	0	2.35619	0.876609	-0.279594	-0.245095
1599	0.502341	0	2.35619	0.876458	-0.279293	-0.244788
1600	0.502655	0	2.35619	0.876307	-0.278991	-0.244482
1601	0.502969	0	2.35619	0.876155	-0.278689	-0.244175
1602	0.503283	0	2.35619	0.876004	-0.278388	-0.243869
1603	0.503597	0	2.35619	0.875852	-0.278086	-0.243562
1604	0.503911	0	2.35619	0.875701	-0.277784	-0.243256
1605	0.504226	0	2.35619	0.875549	-0.277482	-0.242949
1606	0.50454	0	2.35619	0.875397	-0.277181	-0.242643
1607	0.504854	0	2.35619	0.875245	-0.276879	-0.242337
1608	0.505168	0	2.35619	0.875093	-0.276577	-0.24203
1609	0.505482	0	2.35619	0.874941	-0.276275	-0.241724
1610	0.505796	0	2.35619	0.874789	-0.275973	-0.241418
1611	0.506111	0	2.35619	0.874637	-0.275671	-0.241112
1612	0.506425	0	2.35619	0.874484	-0.275369	-0.240806
1613	0.506739	0	2.35619	0.874332	-0.275067	-0.2405
1614	0.507053	0	2.35619	0.874179	-0.274765	-0.240194
1615	0.507367	0	2.35619	0.874027	-0.274463	-0.239888
1616	0.507681	0	2.35619	0.873874	-0.274161	-0.239582
1617	0.507996	0	2.35619	0.873721	-0.273859	-0.239276
1618	0.50831	0	2.35619	0.873568	-0.273556	-0.23897
1619	0.508624	0	2.35619	0.873415	-0.273254	-0.238664
1620	0.508938	0	2.35619	0.873262	-0.272952	-0.238359
1621	0.509252	0	2.35619	0.873109	-0.27265	-0.238053
1622	0.509566	0	2.35619	0.872956	-0.272347	-0.237747
1623	0.50988	0	2.35619	0.872803	-0.272045	-0.237442
1624	0.510195	0	2.35619	0.872649	-0.271743	-0.237136
1625	0.510509	0	2.35619	0.872496	-0.27144	-0.236831
1626	0.510823	0	2.35619	0.872342	-0.271138	-0.236525
1627	0.511137	0	2.35619	0.872189	-0.270836	-0.23622
1628	0.511451	0	2.35619	0.872035	-0.270533	-0.235914
1629	0.511765	0	2.35619	0.871881	-0.270231	-0.235609
1630	0.51208	0	2.35619	0.871727	-0.269928	-0.235304
1631	0.512394	0	2.35619	0.871573	-0.269626	-0.234999
1632	0.512708	0	2.35619	0.871419	-0.269323	-0.234693
1633	0.513022	0	2.35619	0.871265	-0.269021	-0.234388
1634	0.513336	0	2.35619	0.871111	-0.268718	-0.234083
1635	0.51365	0	2.35619	0.870957	-0.268415	-0.233778
1636	0.513965	0	2.35619	0.870802	-0.268113	-0.233473
1637	0.514279	0	2.35619	0.870648	-0.26781	-0.233168
1638	0.514593	0	2.35619	0.870493	-0.267507	-0.232863
1639	0.514907	0	2.35619	0.870339	-0.267205	-0.232559
1640	0.515221	0	2.35619	0.870184	-0.266902	-0.232254
1641	0.515535	0	2.35619	0.870029	-0.266599	-0.231949
1642	0.51585	0	2.35619	0.869874	-0.266296	-0.231644
1643	0.516164	0	2.35619	0.869719	-0.265994	-0.23134
1644	0.516478	0	2.35619	0.869564	-0.265691	-0.231035
1645	0.516792	0	2.35619	0.869409	-0.265388	-0.230731
1646	0.517106	0	2.35619	0.869253	-0.265085	-0.230426
1647	0.51742	0	2.35619	0.869098	-0.264782	-0.230122
1648	0.517734	0	2.35619	0.868943	-0.264479	-0.229817
1649	0.518049	0	2.35619	0.868787	-0.264176	-0.229513
1650	0.518363	0	2.35619	0.868632	-0.263873	-0.229208
1651	0.518677	0	2.35619	0.868476	-0.26357	-0.228904
1652	0.518991	0	2.35619	0.86832	-0.263267	-0.2286
1653	0.519305	0	2.35619	0.868164	-0.262964	-0.228296
1654	0.519619	0	2.35619	0.868008	-0.262661	-0.227992
1655	0.519934	0	2.35619	0.867852	-0.262358	-0.227688
1656	0.520248	0	2.35619	0.867696	-0.262054	-0.227384
1657	0.520562	0	2.35619	0.86754	-0.261751	-0.22708
1658	0.520876	0	2.35619	0.867384	-0.261448	-0.226776
1659	0.52119	0	2.35619	0.867227	-0.261145	-0.226472
1660	0.521504	0	2.35619	0.867071	-0.260842	-0.226168
1661	0.521819	0	2.35619	0.866914	-0.260538	-0.225864
1662	0.522133	0	2.35619	0.866758	-0.260235	-0.225561
1663	0.522447	0	2.35619	0.866601	-0.259932	-0.225257
1664	0.522761	0	2.35619	0.866444	-0.259628	-0.224953
1665	0.523075	0	2.35619	0.866287	-0.259325	-0.22465
1666	0.523389	0	2.35619	0.86613	-0.259021	-0.224346
1667	0.523703	0	2.35619	0.865973	-0.258718	-0.224043
1668	0.524018	0	2.35619	0.865816	-0.258414	-0.223739
1669	0.524332	0	2.35619	0.865659	-0.258111	-0.223436
1670	0.524646	0	2.35619	0.865501	-0.257807	-0.223133
1671	0.52496	0	2.35619	0.865344	-0.257504	-0.222829
1672	0.525274	0	2.35619	0.865186	-0.2572	-0.222526
1673	0.525588	0	2.35619	0.865029	-0.256897	-0.222223
1674	0.525903	0	2.35619	0.864871	-0.256593	-0.22192
1675	0.526217	0	2.35619	0.864713	-0.256289	-0.221617
1676	0.526531	0	2.35619	0.864556	-0.255986	-0.221314
1677	0.526845	0	2.35619	0.864398	-0.255682	-0.221011
1678	0.527159	0	2.35619	0.86424	-0.255378	-0.220708
1679	0.527473	0	2.35619	0.864082	-0.255075	-0.220405
1680	0.527788	0	2.35619	0.863923	-0.254771	-0.220102
1681	0.528102	0	2.35619	0.863765	-0.254467	-0.2198
1682	0.528416	0	2.35619	0.863607	-0.254163	-0.219497
1683	0.52873	0	2.35619	0.863448	-0.253859	-0.219194
1684	0.529044	0	2.35619	0.86329	-0.253555	-0.218892
1685	0.529358	0	2.35619	0.863131	-0.253251	-0.218589
1686	0.529673	0	2.35619	0.862973	-0.252948	-0.218287
1687	0.529987	0	2.35619	0.862814	-0.252644	-0.217984
1688	0.530301	0	2.35619	0.862655	-0.25234	-0.217682
1689	0.530615	0	2.35619	0.862496	-0.252036	-0.21738
1690	0.530929	0	2.35619	0.862337	-0.251732	-0.217077
1691	0.531243	0	2.35619	0.862178	-0.251427	-0.216775
1692	0.531557	0	2.35619	0.862019	-0.251123	-0.216473
1693	0.531872	0	2.35619	0.861859	-0.250819	-0.216171
1694	0.532186	0	2.35619	0.8617	-0.250515	-0.215869
1695	0.5325	0	2.35619	0.861541	-0.250211	-0.215567
1696	0.532814	0	2.35619	0.861381	-0.249907	-0.215265
1697	0.533128	0	2.35619	0.861221	-0.249603	-0.214963
1698	0.533442	0	2.35619	0.861062	-0.249298	-0.214661
1699	0.533757	0	2.35619	0.860902	-0.248994	-0.21436
1700	0.534071	0	2.35619	0.860742	-0.24869	-0.214058
1701	0.534385	0	2.35619	0.860582	-0.248386	-0.213756
1702	0.534699	0	2.35619	0.860422	-0.248081	-0.213455
1703	0.535013	0	2.35619	0.860262	-0.247777	-0.213153
1704	0.535327	0	2.35619	0.860102	-0.247473	-0.212852
1705	0.535642	0	2.35619	0.859941	-0.247168	-0.21255
1706	0.535956	0	2.35619	0.859781	-0.246864	-0.212249
1707	0.53627	0	2.35619	0.859621	-0.246559	-0.211947
1708	0.536584	0	2.35619	0.85946	-0.246255	-0.211646
1709	0.536898	0	2.35619	0.859299	-0.24595	-0.211345
1710	0.537212	0	2.35619	0.859139	-0.245646	-0.211044
1711	0.537527	0	2.35619	0.858978	-0.245341	-0.210743
1712	0.537841	0	2.35619	0.858817	-0.245037	-0.210442
1713	0.538155	0	2.35619	0.858656	-0.244732	-0.210141
1714	0.538469	0	2.35619	0.858495	-0.244427	-0.20984
1715	0.538783	0	2.35619	0.858334	-0.244123	-0.209539
1716	0.539097	0	2.35619	0.858172	-0.243818	-0.209238
1717	0.539411	0	2.35619	0.858011	-0.243513	-0.208937
1718	0.539726	0	2.35619	0.85785	-0.243209	-0.208637
1719	0.54004	0	2.35619	0.857688	-0.242904	-0.208336
1720	0.540354	0	2.35619	0.857527	-0.242599	-0.208035
1721	0.540668	0	2.35619	0.857365	-0.242294	-0.207735
1722	0.540982	0	2.35619	0.857203	-0.24199	-0.207434
1723	0.541296	0	2.35619	0.857041	-0.241685	-0.207134
1724	0.541611	0	2.35619	0.85688	-0.24138	-0.206834
1725	0.541925	0	2.35619	0.856718	-0.241075	-0.206533
1726	0.542239	0	2.35619	0.856555	-0.24077	-0.206233
1727	0.542553	0	2.35619	0.856393	-0.240465	-0.205933
1728	0.542867	0	2.35619	0.856231	-0.24016	-0.205633
1729	0.543181	0	2.35619	0.856069	-0.239855	-0.205333
1730	0.543496	0	2.35619	0.855906	-0.23955	-0.205033
1731	0.54381	0	2.35619	0.855744	-0.239245	-0.204733
1732	0.544124	0	2.35619	0.855581	-0.23894	-0.204433
1733	0.544438	0	2.35619	0.855419	-0.238635	-0.204133
1734	0.544752	0	2.35619	0.855256	-0.23833	-0.203833
1735	0.545066	0	2.35619	0.855093	-0.238025	-0.203533
1736	0.54538	0	2.35619	0.85493	-0.23772	-0.203234
1737	0.545695	0	2.35619	0.854767	-0.237415	-0.202934
1738	0.546009	0	2.35619	0.854604	-0.237109	-0.202635
1739	0.546323	0	2.35619	0.854441	-0.236804	-0.202335
1740	0.546637	0	2.35619	0.854277	-0.236499	-0.202036
1741	0.546951	0	2.35619	0.854114	-0.236194	-0.201736
1742	0.547265	0	2.35619	0.853951	-0.235888	-0.201437
1743	0.54758	0	2.35619	0.853787	-0.235583	-0.201138
1744	0.547894	0	2.35619	0.853624	-0.235278	-0.200839
1745	0.548208	0	2.35619	0.85346	-0.234972	-0.20054
1746	0.548522	0	2.35619	0.853296	-0.234667	-0.200241
1747	0.548836	0	2.35619	0.853132	-0.234362	-0.199942
1748	0.54915	0	2.35619	0.852968	-0.234056	-0.199643
1749	0.549465	0	2.35619	0.852804	-0.233751	-0.199344
1750	0.549779	0	2.35619	0.85264	-0.233445	-0.199045
1751	0.550093	0	2.35619	0.852476	-0.23314	-0.198746
1752	0.550407	0	2.35619	0.852312	-0.232834	-0.198447
1753	0.550721	0	2.35619	0.852147	-0.232529	-0.198149
1754	0.551035	0	2.35619	0.851983	-0.232223	-0.19785
1755	0.55135	0	2.35619	0.851818	-0.231918	-0.197552
1756	0.551664	0	2.35619	0.851654	-0.231612	-0.197253
1757	0.551978	0	2.35619	0.851489	-0.231306	-0.196955
1758	0.552292	0	2.35619	0.851324	-0.231001	-0.196657
1759	0.552606	0	2.35619	0.851159	-0.230695	-0.196358
1760	0.55292	0	2.35619	0.850994	-0.230389	-0.19606
1761	0.553234	0	2.35619	0.850829	-0.230084	-0.195762
1762	0.553549	0	2.35619	0.850664	-0.229778	-0.195464
1763	0.553863	0	2.35619	0.850499	-0.229472	-0.195166
1764	0.554177	0	2.35619	0.850334	-0.229166	-0.194868
1765	0.554491	0	2.35619	0.850168	-0.228861	-0.19457
1766	0.554805	0	2.35619	0.850003	-0.228555	-0.194272
1767	0.555119	0	2.35619	0.849838	-0.228249	-0.193974
1768	0.555434	0	2.35619	0.849672	-0.227943	-0.193677
1769	0.555748	0	2.35619	0.849506	-0.227637	-0.193379
1770	0.556062	0	2.35619	0.84934	-0.227331	-0.193082
1771	0.556376	0	2.35619	0.849175	-0.227025	-0.192784
1772	0.55669	0	2.35619	0.849009	-0.226719	-0.192487
1773	0.557004	0	2.35619	0.848843	-0.226413	-0.192189
1774	0.557319	0	2.35619	0.848676	-0.226107	-0.191892
1775	0.557633	0	2.35619	0.84851	-0.225801	-0.191595
1776	0.557947	0	2.35619	0.848344	-0.225495	-0.191297
1777	0.558261	0	2.35619	0.848178	-0.225189	-0.191
1778	0.558575	0	2.35619	0.848011	-0.224883	-0.190703
1779	0.558889	0	2.35619	0.847845	-0.224577	-0.190406
1780	0.559203	0	2.35619	0.847678	-0.224271	-0.190109
1781	0.559518	0	2.35619	0.847511	-0.223965	-0.189813
1782	0.559832	0	2.35619	0.847344	-0.223658	-0.189516
1783	0.560146	0	2.35619	0.847178	-0.223352	-0.189219
1784	0.56046	0	2.35619	0.847011	-0.223046	-0.188922
1785	0.560774	0	2.35619	0.846844	-0.22274	-0.188626
1786	0.561088	0	2.35619	0.846676	-0.222433	-0.188329
1787	0.561403	0	2.35619	0.846509	-0.222127	-0.188033
1788	0.561717	0	2.35619	0.846342	-0.221821	-0.187736
1789	0.562031	0	2.35619	0.846175	-0.221514	-0.18744
1790	0.562345	0	2.35619	0.846007	-0.221208	-0.187144
1791	0.562659	0	2.35619	0.84584	-0.220902	-0.186847
1792	0.562973	0	2.35619	0.845672	-0.220595	-0.186551
1793	0.563288	0	2.35619	0.845504	-0.220289	-0.186255
1794	0.563602	0	2.35619	0.845336	-0.219982	-0.185959
1795	0.563916	0	2.35619	0.845169	-0.219676	-0.185663
1796	0.56423	0	2.35619	0.845001	-0.219369	-0.185367
1797	0.564544	0	2.35619	0.844833	-0.219063	-0.185071
1798	0.564858	0	2.35619	0.844664	-0.218756	-0.184776
1799	0.565173	0	2.35619	0.844496	-0.21845	-0.18448
1800	0.565487	0	2.35619	0.844328	-0.218143	-0.184184
1801	0.565801	0	2.35619	0.84416	-0.217837	-0.183889
1802	0.566115	0	2.35619	0.843991	-0.21753	-0.183593
1803	0.566429	0	2.35619	0.843823	-0.217223	-0.183298
1804	0.566743	0	2.35619	0.843654	-0.216917	-0.183003
1805	0.567057	0	2.35619	0.843485	-0.21661	-0.182707
1806	0.567372	0	2.35619	0.843316	-0.216303	-0.182412
1807	0.567686	0	2.35619	0.843148	-0.215997	-0.182117
1808	0.568	0	2.35619	0.842979	-0.21569	-0.181822
1809	0.568314	0	2.35619	0.84281	-0.215383	-0.181527
1810	0.568628	0	2.35619	0.84264	-0.215076	-0.181232
1811	0.568942	0	2.35619	0.842471	-0.214769	-0.180937
1812	0.569257	0	2.35619	0.842302	-0.214463	-0.180642
1813	0.569571	0	2.35619	0.842133	-0.214156	-0.180347
1814	0.569885	0	2.35619	0.841963	-0.213849	-0.180053
1815	0.570199	0	2.35619	0.841794	-0.213542	-0.179758
1816	0.570513	0	2.35619	0.841624	-0.213235	-0.179464
1817	0.570827	0	2.35619	0.841454	-0.212928	-0.179169
1818	0.571142	0	2.35619	0.841284	-0.212621	-0.178875
1819	0.571456	0	2.35619	0.841115	-0.212314	-0.17858
1820	0.57177	0	2.35619	0.840945	-0.212007	-0.178286
1821	0.572084	0	2.35619	0.840775	-0.2117	-0.177992
1822	0.572398	0	2.35619	0.840604	-0.211393	-0.177698
1823	0.572712	0	2.35619	0.840434	-0.211086	-0.177404
1824	0.573027	0	2.35619	0.840264	-0.210779	-0.17711
1825	0.573341	0	2.35619	0.840094	-0.210472	-0.176816
1826	0.573655	0	2.35619	0.839923	-0.210165	-0.176522
1827	0.573969	0	2.35619	0.839753	-0.209857	-0.176228
1828	0.574283	0	2.35619	0.839582	-0.20955	-0.175935
1829	0.574597	0	2.35619	0.839411	-0.209243	-0.175641
1830	0.574911	0	2.35619	0.83924	-0.208936	-0.175347
1831	0.575226	0	2.35619	0.83907	-0.208629	-0.175054
1832	0.57554	0	2.35619	0.838899	-0.208321	-0.174761
1833	0.575854	0	2.35619	0.838728	-0.208014	-0.174467
1834	0.576168	0	2.35619	0.838556	-0.207707	-0.174174
1835	0.576482	0	2.35619	0.838385	-0.2074	-0.173881
1836	0.576796	0	2.35619	0.838214	-0.207092	-0.173588
1837	0.577111	0	2.35619	0.838043	-0.206785	-0.173294
1838	0.577425	0	2.35619	0.837871	-0.206477	-0.173001
1839	0.577739	0	2.35619	0.8377	-0.20617	-0.172709
1840	0.578053	0	2.35619	0.837528	-0.205863	-0.172416
1841	0.578367	0	2.35619	0.837356	-0.205555	-0.172123
1842	0.578681	0	2.35619	0.837185	-0.205248	-0.17183
1843	0.578996	0	2.35619	0.837013	-0.20494	-0.171538
1844	0.57931	0	2.35619	0.836841	-0.204633	-0.171245
1845	0.579624	0	2.35619	0.836669	-0.204325	-0.170953
1846	0.579938	0	2.35619	0.836497	-0.204018	-0.17066
1847	0.580252	0	2.35619	0.836324	-0.20371	-0.170368
1848	0.580566	0	2.35619	0.836152	-0.203403	-0.170075
1849	0.58088	0	2.35619	0.83598	-0.203095	-0.169783
1850	0.581195	0	2.35619	0.835807	-0.202787	-0.169491
1851	0.581509	0	2.35619	0.835635	-0.20248	-0.169199
1852	0.581823	0	2.35619	0.835462	-0.202172	-0.168907
1853	0.582137	0	2.35619	0.83529	-0.201864	-0.168615
1854	0.582451	0	2.35619	0.835117	-0.201557	-0.168323
1855	0.582765	0	2.35619	0.834944	-0.201249	-0.168032
1856	0.58308	0	2.35619	0.834771	-0.200941	-0.16774
1857	0.583394	0	2.35619	0.834598	-0.200633	-0.167448
1858	0.583708	0	2.35619	0.834425	-0.200326	-0.167157
1859	0.584022	0	2.35619	0.834252	-0.200018	-0.166865
1860	0.584336	0	2.35619	0.834078	-0.19971	-0.166574
1861	0.58465	0	2.35619	0.833905	-0.199402	-0.166282
1862	0.584965	0	2.35619	0.833732	-0.199094	-0.165991
1863	0.585279	0	2.35619	0.833558	-0.198786	-0.1657
1864	0.585593	0	2.35619	0.833385	-0.198479	-0.165409
1865	0.585907	0	2.35619	0.833211	-0.198171	-0.165118
1866	0.586221	0	2.35619	0.833037	-0.197863	-0.164827
1867	0.586535	0	2.35619	0.832863	-0.197555	-0.164536
1868	0.58685	0	2.35619	0.832689	-0.197247	-0.164245
1869	0.587164	0	2.35619	0.832515	-0.196939	-0.163955
1870	0.587478	0	2.35619	0.832341	-0.196631	-0.163664
1871	0.587792	0	2.35619	0.832167	-0.196323	-0.163373
1872	0.588106	0	2.35619	0.831993	-0.196015	-0.163083
1873	0.58842	0	2.35619	0.831819	-0.195707	-0.162792
1874	0.588734	0	2.35619	0.831644	-0.195398	-0.162502
1875	0.589049	0	2.35619	0.83147	-0.19509	-0.162212
1876	0.589363	0	2.35619	0.831295	-0.194782	-0.161921
1877	0.589677	0	2.35619	0.83112	-0.194474	-0.161631
1878	0.589991	0	2.35619	0.830946	-0.194166	-0.161341
1879	0.590305	0	2.35619	0.830771	-0.193858	-0.161051
1880	0.590619	0	2.35619	0.830596	-0.193549	-0.160761
1881	0.590934	0	2.35619	0.830421	-0.193241	-0.160472
1882	0.591248	0	2.35619	0.830246	-0.192933	-0.160182
1883	0.591562	0	2.35619	0.830071	-0.192625	-0.159892
1884	0.591876	0	2.35619	0.829895	-0.192316	-0.159603
1885	0.59219	0	2.35619	0.82972	-0.192008	-0.159313
1886	0.592504	0	2.35619	0.829545	-0.1917	-0.159024
1887	0.592819	0	2.35619	0.829369	-0.191391	-0.158734
1888	0.593133	0	2.35619	0.829194	-0.191083	-0.158445
1889	0.593447	0	2.35619	0.829018	-0.190775	-0.158156
1890	0.593761	0	2.35619	0.828842	-0.190466	-0.157867
1891	0.594075	0	2.35619	0.828667	-0.190158	-0.157577
1892	0.594389	0	2.35619	0.828491	-0.189849	-0.157289
1893	0.594703	0	2.35619	0.828315	-0.189541	-0.157
1894	0.595018	0	2.35619	0.828139	-0.189233	-0.156711
1895	0.595332	0	2.35619	0.827962	-0.188924	-0.156422
1896	0.595646	0	2.35619	0.827786	-0.188616	-0.156133
1897	0.59596	0	2.35619	0.82761	-0.188307	-0.155845
1898	0.596274	0	2.35619	0.827434	-0.187998	-0.155556
1899	0.596588	0	2.35619	0.827257	-0.18769	-0.155268
1900	0.596903	0	2.35619	0.827081	-0.187381	-0.154979
1901	0.597217	0	2.35619	0.826904	-0.187073	-0.154691
1902	0.597531	0	2.35619	0.826727	-0.186764	-0.154403
1903	0.597845	0	2.35619	0.82655	-0.186455	-0.154115
1904	0.598159	0	2.35619	0.826374	-0.186147	-0.153827
1905	0.598473	0	2.35619	0.826197	-0.185838	-0.153539
1906	0.598788	0	2.35619	0.82602	-0.185529	-0.153251
1907	0.599102	0	2.35619	0.825842	-0.185221	-0.152963
1908	0.599416	0	2.35619	0.825665	-0.184912	-0.152675
1909	0.59973	0	2.35619	0.825488	-0.184603	-0.152388
1910	0.600044	0	2.35619	0.825311	-0.184294	-0.1521
1911	0.600358	0	2.35619	0.825133	-0.183986	-0.151813
1912	0.600673	0	2.35619	0.824956	-0.183677	-0.151525
1913	0.600987	0	2.35619	0.824778	-0.183368	-0.151238
1914	0.601301	0	2.35619	0.8246	-0.183059	-0.150951
1915	0.601615	0	2.35619	0.824423	-0.18275	-0.150664
1916	0.601929	0	2.35619	0.824245	-0.182441	-0.150376
1917	0.602243	0	2.35619	0.824067	-0.182133	-0.150089
1918	0.602557	0	2.35619	0.823889	-0.181824	-0.149802
1919	0.602872	0	2.35619	0.823711	-0.181515	-0.149516
1920	0.603186	0	2.35619	0.823533	-0.181206	-0.149229
1921	0.6035	0	2.35619	0.823354	-0.180897	-0.148942
1922	0.603814	0	2.35619	0.823176	-0.180588	-0.148656
1923	0.604128	0	2.35619	0.822998	-0.180279	-0.148369
1924	0.604442	0	2.35619	0.822819	-0.17997	-0.148083
1925	0.604757	0	2.35619	0.822641	-0.179661	-0.147796
1926	0.605071	0	2.35619	0.822462	-0.179352	-0.14751
1927	0.605385	0	2.35619	0.822283	-0.179043	-0.147224
1928	0.605699	0	2.35619	0.822104	-0.178734	-0.146938
1929	0.606013	0	2.35619	0.821925	-0.178424	-0.146652
1930	0.606327	0	2.35619	0.821746	-0.178115	-0.146366
1931	0.606642	0	2.35619	0.821567	-0.177806	-0.14608
1932	0.606956	0	2.35619	0.821388	-0.177497	-0.145794
1933	0.60727	0	2.35619	0.821209	-0.177188	-0.145508
1934	0.607584	0	2.35619	0.82103	-0.176879	-0.145223
1935	0.607898	0	2.35619	0.82085	-0.176569	-0.144937
1936	0.608212	0	2.35619	0.820671	-0.17626	-0.144652
1937	0.608526	0	2.35619	0.820491	-0.175951	-0.144366
1938	0.608841	0	2.35619	0.820312	-0.175642	-0.144081
1939	0.609155	0	2.35619	0.820132	-0.175332	-0.143796
1940	0.609469	0	2.35619	0.819952	-0.175023	-0.143511
1941	0.609783	0	2.35619	0.819772	-0.174714	-0.143225
1942	0.610097	0	2.35619	0.819592	-0.174404	-0.142941
1943	0.610411	0	2.35619	0.819412	-0.174095	-0.142656
1944	0.610726	0	2.35619	0.819232	-0.173786	-0.142371
1945	0.61104	0	2.35619	0.819052	-0.173476	-0.142086
1946	0.611354	0	2.35619	0.818872	-0.173167	-0.141801
1947	0.611668	0	2.35619	0.818691	-0.172857	-0.141517
1948	0.611982	0	2.35619	0.818511	-0.172548	-0.141232
1949	0.612296	0	2.35619	0.81833	-0.172239	-0.140948
1950	0.612611	0	2.35619	0.81815	-0.171929	-0.140664
1951	0.612925	0	2.35619	0.817969	-0.17162	-0.14038
1952	0.613239	0	2.35619	0.817788	-0.17131	-0.140095
1953	0.613553	0	2.35619	0.817607	-0.171001	-0.139811
1954	0.613867	0	2.35619	0.817426	-0.170691	-0.139527
1955	0.614181	0	2.35619	0.817245	-0.170381	-0.139243
1956	0.614496	0	2.35619	0.817064	-0.170072	-0.13896
1957	0.61481	0	2.35619	0.816883	-0.169762	-0.138676
1958	0.615124	0	2.35619	0.816702	-0.169453	-0.138392
1959	0.615438	0	2.35619	0.816521	-0.169143	-0.138109
1960	0.615752	0	2.35619	0.816339	-0.168833	-0.137825
1961	0.616066	0	2.35619	0.816158	-0.168524	-0.137542
1962	0.61638	0	2.35619	0.815976	-0.168214	-0.137259
1963	0.616695	0	2.35619	0.815795	-0.167904	-0.136976
1964	0.617009	0	2.35619	0.815613	-0.167595	-0.136692
1965	0.617323	0	2.35619	0.815431	-0.167285	-0.136409
1966	0.617637	0	2.35619	0.815249	-0.166975	-0.136126
1967	0.617951	0	2.35619	0.815067	-0.166665	-0.135844
1968	0.618265	0	2.35619	0.814885	-0.166356	-0.135561
1969	0.61858	0	2.35619	0.814703	-0.166046	-0.135278
1970	0.618894	0	2.35619	0.814521	-0.165736	-0.134996
1971	0.619208	0	2.35619	0.814338	-0.165426	-0.134713
1972	0.619522	0	2.35619	0.814156	-0.165116	-0.134431
1973	0.619836	0	2.35619	0.813974	-0.164807	-0.134148
1974	0.62015	0	2.35619	0.813791	-0.164497	-0.133866
1975	0.620465	0	2.35619	0.813608	-0.164187	-0.133584
1976	0.620779	0	2.35619	0.813426	-0.163877	-0.133302
1977	0.621093	0	2.35619	0.813243	-0.163567	-0.13302
1978	0.621407	0	2.35619	0.81306	-0.163257	-0.132738
1979	0.621721	0	2.35619	0.812877	-0.162947	-0.132456
1980	0.622035	0	2.35619	0.812694	-0.162637	-0.132174
1981	0.62235	0	2.35619	0.812511	-0.162327	-0.131893
1982	0.622664	0	2.35619	0.812328	-0.162017	-0.131611
1983	0.622978	0	2.35619	0.812145	-0.161707	-0.13133
1984	0.623292	0	2.35619	0.811961	-0.161397	-0.131048
1985	0.623606	0	2.35619	0.811778	-0.161087	-0.130767
1986	0.62392	0	2.35619	0.811594	-0.160777	-0.130486
1987	0.624234	0	2.35619	0.811411	-0.160467	-0.130205
1988	0.624549	0	2.35619	0.811227	-0.160157	-0.129924
1989	0.624863	0	2.35619	0.811043	-0.159847	-0.129643
1990	0.625177	0	2.35619	0.81086	-0.159537	-0.129362
1991	0.625491	0	2.35619	0.810676	-0.159226	-0.129081
1992	0.625805	0	2.35619	0.810492	-0.158916	-0.1288
1993	0.626119	0	2.35619	0.810308	-0.158606	-0.12852
1994	0.626434	0	2.35619	0.810124	-0.158296	-0.128239
1995	0.626748	0	2.35619	0.809939	-0.157986	-0.127959
1996	0.627062	0	2.35619	0.809755	-0.157676	-0.127679
1997	0.627376	0	2.35619	0.809571	-0.157365	-0.127398
1998	0.62769	0	2.35619	0.809386	-0.157055	-0.127118
[truncated: 8,004 more rows]

## Sheet: 45-22.5
Step(i)	Time/Angle(θ)	Setting(a=45)	Setting(b=22.5)	EAlice	Ebob	Joint intensity
0	0	1.5708	0.785398	6.12574e-17	0.707107	4.33155e-17
1	0.000314159	1.5708	0.785398	0.000314159	0.707329	0.000222214
2	0.000628319	1.5708	0.785398	0.000628318	0.707551	0.000444567
3	0.000942478	1.5708	0.785398	0.000942478	0.707773	0.00066706
4	0.00125664	1.5708	0.785398	0.00125664	0.707995	0.000889692
5	0.0015708	1.5708	0.785398	0.0015708	0.708217	0.00111246
6	0.00188496	1.5708	0.785398	0.00188495	0.708438	0.00133537
7	0.00219911	1.5708	0.785398	0.00219911	0.70866	0.00155842
8	0.00251327	1.5708	0.785398	0.00251327	0.708882	0.00178161
9	0.00282743	1.5708	0.785398	0.00282743	0.709103	0.00200494
10	0.00314159	1.5708	0.785398	0.00314159	0.709325	0.00222841
11	0.00345575	1.5708	0.785398	0.00345575	0.709546	0.00245201
12	0.00376991	1.5708	0.785398	0.0037699	0.709767	0.00267575
13	0.00408407	1.5708	0.785398	0.00408406	0.709989	0.00289964
14	0.00439823	1.5708	0.785398	0.00439822	0.71021	0.00312366
15	0.00471239	1.5708	0.785398	0.00471237	0.710431	0.00334782
16	0.00502655	1.5708	0.785398	0.00502653	0.710652	0.00357211
17	0.00534071	1.5708	0.785398	0.00534068	0.710873	0.00379655
18	0.00565487	1.5708	0.785398	0.00565484	0.711094	0.00402112
19	0.00596903	1.5708	0.785398	0.00596899	0.711315	0.00424583
20	0.00628319	1.5708	0.785398	0.00628314	0.711536	0.00447068
21	0.00659734	1.5708	0.785398	0.0065973	0.711756	0.00469567
22	0.0069115	1.5708	0.785398	0.00691145	0.711977	0.00492079
23	0.00722566	1.5708	0.785398	0.0072256	0.712198	0.00514606
24	0.00753982	1.5708	0.785398	0.00753975	0.712418	0.00537145
25	0.00785398	1.5708	0.785398	0.0078539	0.712639	0.00559699
26	0.00816814	1.5708	0.785398	0.00816805	0.712859	0.00582267
27	0.0084823	1.5708	0.785398	0.0084822	0.713079	0.00604848
28	0.00879646	1.5708	0.785398	0.00879635	0.713299	0.00627443
29	0.00911062	1.5708	0.785398	0.00911049	0.71352	0.00650051
30	0.00942478	1.5708	0.785398	0.00942464	0.71374	0.00672674
31	0.00973894	1.5708	0.785398	0.00973878	0.71396	0.0069531
32	0.0100531	1.5708	0.785398	0.0100529	0.71418	0.00717959
33	0.0103673	1.5708	0.785398	0.0103671	0.714399	0.00740623
34	0.0106814	1.5708	0.785398	0.0106812	0.714619	0.007633
35	0.0109956	1.5708	0.785398	0.0109954	0.714839	0.00785991
36	0.0113097	1.5708	0.785398	0.0113095	0.715059	0.00808695
37	0.0116239	1.5708	0.785398	0.0116236	0.715278	0.00831413
38	0.0119381	1.5708	0.785398	0.0119378	0.715498	0.00854145
39	0.0122522	1.5708	0.785398	0.0122519	0.715717	0.0087689
40	0.0125664	1.5708	0.785398	0.012566	0.715936	0.00899649
41	0.0128805	1.5708	0.785398	0.0128802	0.716156	0.00922421
42	0.0131947	1.5708	0.785398	0.0131943	0.716375	0.00945207
43	0.0135088	1.5708	0.785398	0.0135084	0.716594	0.00968007
44	0.013823	1.5708	0.785398	0.0138226	0.716813	0.0099082
45	0.0141372	1.5708	0.785398	0.0141367	0.717032	0.0101365
46	0.0144513	1.5708	0.785398	0.0144508	0.717251	0.0103649
47	0.0147655	1.5708	0.785398	0.0147649	0.71747	0.0105934
48	0.0150796	1.5708	0.785398	0.0150791	0.717689	0.0108221
49	0.0153938	1.5708	0.785398	0.0153932	0.717908	0.0110509
50	0.015708	1.5708	0.785398	0.0157073	0.718126	0.0112798
51	0.0160221	1.5708	0.785398	0.0160214	0.718345	0.0115089
52	0.0163363	1.5708	0.785398	0.0163356	0.718563	0.0117381
53	0.0166504	1.5708	0.785398	0.0166497	0.718782	0.0119675
54	0.0169646	1.5708	0.785398	0.0169638	0.719	0.012197
55	0.0172788	1.5708	0.785398	0.0172779	0.719219	0.0124266
56	0.0175929	1.5708	0.785398	0.017592	0.719437	0.0126563
57	0.0179071	1.5708	0.785398	0.0179061	0.719655	0.0128862
58	0.0182212	1.5708	0.785398	0.0182202	0.719873	0.0131163
59	0.0185354	1.5708	0.785398	0.0185343	0.720091	0.0133464
60	0.0188496	1.5708	0.785398	0.0188484	0.720309	0.0135767
61	0.0191637	1.5708	0.785398	0.0191625	0.720527	0.0138071
62	0.0194779	1.5708	0.785398	0.0194766	0.720745	0.0140377
63	0.019792	1.5708	0.785398	0.0197907	0.720962	0.0142684
64	0.0201062	1.5708	0.785398	0.0201048	0.72118	0.0144992
65	0.0204204	1.5708	0.785398	0.0204189	0.721398	0.0147302
66	0.0207345	1.5708	0.785398	0.020733	0.721615	0.0149613
67	0.0210487	1.5708	0.785398	0.0210471	0.721833	0.0151925
68	0.0213628	1.5708	0.785398	0.0213612	0.72205	0.0154239
69	0.021677	1.5708	0.785398	0.0216753	0.722267	0.0156554
70	0.0219911	1.5708	0.785398	0.0219894	0.722485	0.015887
71	0.0223053	1.5708	0.785398	0.0223035	0.722702	0.0161187
72	0.0226195	1.5708	0.785398	0.0226175	0.722919	0.0163506
73	0.0229336	1.5708	0.785398	0.0229316	0.723136	0.0165827
74	0.0232478	1.5708	0.785398	0.0232457	0.723353	0.0168148
75	0.0235619	1.5708	0.785398	0.0235598	0.72357	0.0170471
76	0.0238761	1.5708	0.785398	0.0238738	0.723787	0.0172796
77	0.0241903	1.5708	0.785398	0.0241879	0.724003	0.0175121
78	0.0245044	1.5708	0.785398	0.024502	0.72422	0.0177448
79	0.0248186	1.5708	0.785398	0.024816	0.724437	0.0179776
80	0.0251327	1.5708	0.785398	0.0251301	0.724653	0.0182106
81	0.0254469	1.5708	0.785398	0.0254442	0.72487	0.0184437
82	0.0257611	1.5708	0.785398	0.0257582	0.725086	0.0186769
83	0.0260752	1.5708	0.785398	0.0260723	0.725302	0.0189103
84	0.0263894	1.5708	0.785398	0.0263863	0.725519	0.0191438
85	0.0267035	1.5708	0.785398	0.0267004	0.725735	0.0193774
86	0.0270177	1.5708	0.785398	0.0270144	0.725951	0.0196111
87	0.0273319	1.5708	0.785398	0.0273285	0.726167	0.019845
88	0.027646	1.5708	0.785398	0.0276425	0.726383	0.020079
89	0.0279602	1.5708	0.785398	0.0279565	0.726599	0.0203132
90	0.0282743	1.5708	0.785398	0.0282706	0.726814	0.0205475
91	0.0285885	1.5708	0.785398	0.0285846	0.72703	0.0207819
92	0.0289027	1.5708	0.785398	0.0288986	0.727246	0.0210164
93	0.0292168	1.5708	0.785398	0.0292127	0.727461	0.0212511
94	0.029531	1.5708	0.785398	0.0295267	0.727677	0.0214859
95	0.0298451	1.5708	0.785398	0.0298407	0.727892	0.0217208
96	0.0301593	1.5708	0.785398	0.0301547	0.728108	0.0219559
97	0.0304734	1.5708	0.785398	0.0304687	0.728323	0.0221911
98	0.0307876	1.5708	0.785398	0.0307827	0.728538	0.0224264
99	0.0311018	1.5708	0.785398	0.0310968	0.728754	0.0226619
100	0.0314159	1.5708	0.785398	0.0314108	0.728969	0.0228975
101	0.0317301	1.5708	0.785398	0.0317248	0.729184	0.0231332
102	0.0320442	1.5708	0.785398	0.0320388	0.729399	0.023369
103	0.0323584	1.5708	0.785398	0.0323528	0.729613	0.023605
104	0.0326726	1.5708	0.785398	0.0326668	0.729828	0.0238411
105	0.0329867	1.5708	0.785398	0.0329807	0.730043	0.0240774
106	0.0333009	1.5708	0.785398	0.0332947	0.730258	0.0243137
107	0.033615	1.5708	0.785398	0.0336087	0.730472	0.0245502
108	0.0339292	1.5708	0.785398	0.0339227	0.730687	0.0247869
109	0.0342434	1.5708	0.785398	0.0342367	0.730901	0.0250236
110	0.0345575	1.5708	0.785398	0.0345506	0.731116	0.0252605
111	0.0348717	1.5708	0.785398	0.0348646	0.73133	0.0254975
112	0.0351858	1.5708	0.785398	0.0351786	0.731544	0.0257347
113	0.0355	1.5708	0.785398	0.0354925	0.731758	0.025972
114	0.0358142	1.5708	0.785398	0.0358065	0.731972	0.0262094
115	0.0361283	1.5708	0.785398	0.0361205	0.732186	0.0264469
116	0.0364425	1.5708	0.785398	0.0364344	0.7324	0.0266846
117	0.0367566	1.5708	0.785398	0.0367484	0.732614	0.0269224
118	0.0370708	1.5708	0.785398	0.0370623	0.732828	0.0271603
119	0.037385	1.5708	0.785398	0.0373762	0.733042	0.0273983
120	0.0376991	1.5708	0.785398	0.0376902	0.733255	0.0276365
121	0.0380133	1.5708	0.785398	0.0380041	0.733469	0.0278748
122	0.0383274	1.5708	0.785398	0.038318	0.733682	0.0281133
123	0.0386416	1.5708	0.785398	0.038632	0.733896	0.0283518
124	0.0389557	1.5708	0.785398	0.0389459	0.734109	0.0285905
125	0.0392699	1.5708	0.785398	0.0392598	0.734323	0.0288294
126	0.0395841	1.5708	0.785398	0.0395737	0.734536	0.0290683
127	0.0398982	1.5708	0.785398	0.0398876	0.734749	0.0293074
128	0.0402124	1.5708	0.785398	0.0402015	0.734962	0.0295466
129	0.0405265	1.5708	0.785398	0.0405155	0.735175	0.0297859
130	0.0408407	1.5708	0.785398	0.0408294	0.735388	0.0300254
131	0.0411549	1.5708	0.785398	0.0411432	0.735601	0.030265
132	0.041469	1.5708	0.785398	0.0414571	0.735813	0.0305047
133	0.0417832	1.5708	0.785398	0.041771	0.736026	0.0307446
134	0.0420973	1.5708	0.785398	0.0420849	0.736239	0.0309845
135	0.0424115	1.5708	0.785398	0.0423988	0.736451	0.0312246
136	0.0427257	1.5708	0.785398	0.0427127	0.736664	0.0314649
137	0.0430398	1.5708	0.785398	0.0430265	0.736876	0.0317052
138	0.043354	1.5708	0.785398	0.0433404	0.737089	0.0319457
139	0.0436681	1.5708	0.785398	0.0436543	0.737301	0.0321863
140	0.0439823	1.5708	0.785398	0.0439681	0.737513	0.0324271
141	0.0442965	1.5708	0.785398	0.044282	0.737725	0.0326679
142	0.0446106	1.5708	0.785398	0.0445958	0.737937	0.0329089
143	0.0449248	1.5708	0.785398	0.0449097	0.738149	0.03315
144	0.0452389	1.5708	0.785398	0.0452235	0.738361	0.0333913
145	0.0455531	1.5708	0.785398	0.0455373	0.738573	0.0336327
146	0.0458673	1.5708	0.785398	0.0458512	0.738785	0.0338741
147	0.0461814	1.5708	0.785398	0.046165	0.738996	0.0341158
148	0.0464956	1.5708	0.785398	0.0464788	0.739208	0.0343575
149	0.0468097	1.5708	0.785398	0.0467926	0.73942	0.0345994
150	0.0471239	1.5708	0.785398	0.0471065	0.739631	0.0348414
151	0.047438	1.5708	0.785398	0.0474203	0.739842	0.0350835
152	0.0477522	1.5708	0.785398	0.0477341	0.740054	0.0353258
153	0.0480664	1.5708	0.785398	0.0480479	0.740265	0.0355682
154	0.0483805	1.5708	0.785398	0.0483617	0.740476	0.0358107
155	0.0486947	1.5708	0.785398	0.0486754	0.740687	0.0360533
156	0.0490088	1.5708	0.785398	0.0489892	0.740898	0.036296
157	0.049323	1.5708	0.785398	0.049303	0.741109	0.0365389
158	0.0496372	1.5708	0.785398	0.0496168	0.74132	0.0367819
159	0.0499513	1.5708	0.785398	0.0499306	0.741531	0.0370251
160	0.0502655	1.5708	0.785398	0.0502443	0.741742	0.0372683
161	0.0505796	1.5708	0.785398	0.0505581	0.741952	0.0375117
162	0.0508938	1.5708	0.785398	0.0508718	0.742163	0.0377552
163	0.051208	1.5708	0.785398	0.0511856	0.742374	0.0379988
164	0.0515221	1.5708	0.785398	0.0514993	0.742584	0.0382426
165	0.0518363	1.5708	0.785398	0.0518131	0.742794	0.0384865
166	0.0521504	1.5708	0.785398	0.0521268	0.743005	0.0387305
167	0.0524646	1.5708	0.785398	0.0524405	0.743215	0.0389746
168	0.0527788	1.5708	0.785398	0.0527543	0.743425	0.0392188
169	0.0530929	1.5708	0.785398	0.053068	0.743635	0.0394632
170	0.0534071	1.5708	0.785398	0.0533817	0.743845	0.0397077
171	0.0537212	1.5708	0.785398	0.0536954	0.744055	0.0399523
172	0.0540354	1.5708	0.785398	0.0540091	0.744265	0.0401971
173	0.0543496	1.5708	0.785398	0.0543228	0.744475	0.040442
174	0.0546637	1.5708	0.785398	0.0546365	0.744684	0.0406869
175	0.0549779	1.5708	0.785398	0.0549502	0.744894	0.0409321
176	0.055292	1.5708	0.785398	0.0552639	0.745104	0.0411773
177	0.0556062	1.5708	0.785398	0.0555775	0.745313	0.0414227
178	0.0559203	1.5708	0.785398	0.0558912	0.745523	0.0416682
179	0.0562345	1.5708	0.785398	0.0562049	0.745732	0.0419138
180	0.0565487	1.5708	0.785398	0.0565185	0.745941	0.0421595
181	0.0568628	1.5708	0.785398	0.0568322	0.74615	0.0424054
182	0.057177	1.5708	0.785398	0.0571458	0.746359	0.0426513
183	0.0574911	1.5708	0.785398	0.0574595	0.746569	0.0428974
184	0.0578053	1.5708	0.785398	0.0577731	0.746777	0.0431437
185	0.0581195	1.5708	0.785398	0.0580867	0.746986	0.04339
186	0.0584336	1.5708	0.785398	0.0584004	0.747195	0.0436365
187	0.0587478	1.5708	0.785398	0.058714	0.747404	0.0438831
188	0.0590619	1.5708	0.785398	0.0590276	0.747613	0.0441298
189	0.0593761	1.5708	0.785398	0.0593412	0.747821	0.0443766
190	0.0596903	1.5708	0.785398	0.0596548	0.74803	0.0446236
191	0.0600044	1.5708	0.785398	0.0599684	0.748238	0.0448707
192	0.0603186	1.5708	0.785398	0.060282	0.748447	0.0451179
193	0.0606327	1.5708	0.785398	0.0605956	0.748655	0.0453652
194	0.0609469	1.5708	0.785398	0.0609092	0.748863	0.0456126
195	0.0612611	1.5708	0.785398	0.0612227	0.749071	0.0458602
196	0.0615752	1.5708	0.785398	0.0615363	0.749279	0.0461079
197	0.0618894	1.5708	0.785398	0.0618499	0.749487	0.0463557
198	0.0622035	1.5708	0.785398	0.0621634	0.749695	0.0466036
199	0.0625177	1.5708	0.785398	0.062477	0.749903	0.0468517
200	0.0628319	1.5708	0.785398	0.0627905	0.750111	0.0470999
201	0.063146	1.5708	0.785398	0.0631041	0.750319	0.0473482
202	0.0634602	1.5708	0.785398	0.0634176	0.750526	0.0475966
203	0.0637743	1.5708	0.785398	0.0637311	0.750734	0.0478451
204	0.0640885	1.5708	0.785398	0.0640446	0.750942	0.0480938
205	0.0644026	1.5708	0.785398	0.0643581	0.751149	0.0483425
206	0.0647168	1.5708	0.785398	0.0646716	0.751356	0.0485914
207	0.065031	1.5708	0.785398	0.0649851	0.751564	0.0488405
208	0.0653451	1.5708	0.785398	0.0652986	0.751771	0.0490896
209	0.0656593	1.5708	0.785398	0.0656121	0.751978	0.0493389
210	0.0659734	1.5708	0.785398	0.0659256	0.752185	0.0495882
211	0.0662876	1.5708	0.785398	0.0662391	0.752392	0.0498377
212	0.0666018	1.5708	0.785398	0.0665525	0.752599	0.0500874
213	0.0669159	1.5708	0.785398	0.066866	0.752806	0.0503371
214	0.0672301	1.5708	0.785398	0.0671794	0.753012	0.050587
215	0.0675442	1.5708	0.785398	0.0674929	0.753219	0.0508369
216	0.0678584	1.5708	0.785398	0.0678063	0.753426	0.051087
217	0.0681726	1.5708	0.785398	0.0681198	0.753632	0.0513373
218	0.0684867	1.5708	0.785398	0.0684332	0.753839	0.0515876
219	0.0688009	1.5708	0.785398	0.0687466	0.754045	0.051838
220	0.069115	1.5708	0.785398	0.06906	0.754251	0.0520886
221	0.0694292	1.5708	0.785398	0.0693734	0.754458	0.0523393
222	0.0697434	1.5708	0.785398	0.0696868	0.754664	0.0525901
223	0.0700575	1.5708	0.785398	0.0700002	0.75487	0.0528411
224	0.0703717	1.5708	0.785398	0.0703136	0.755076	0.0530921
225	0.0706858	1.5708	0.785398	0.070627	0.755282	0.0533433
226	0.071	1.5708	0.785398	0.0709404	0.755488	0.0535946
227	0.0713142	1.5708	0.785398	0.0712537	0.755693	0.053846
228	0.0716283	1.5708	0.785398	0.0715671	0.755899	0.0540975
229	0.0719425	1.5708	0.785398	0.0718804	0.756105	0.0543491
230	0.0722566	1.5708	0.785398	0.0721938	0.75631	0.0546009
231	0.0725708	1.5708	0.785398	0.0725071	0.756516	0.0548528
232	0.0728849	1.5708	0.785398	0.0728204	0.756721	0.0551048
233	0.0731991	1.5708	0.785398	0.0731338	0.756927	0.0553569
234	0.0735133	1.5708	0.785398	0.0734471	0.757132	0.0556091
235	0.0738274	1.5708	0.785398	0.0737604	0.757337	0.0558615
236	0.0741416	1.5708	0.785398	0.0740737	0.757542	0.0561139
237	0.0744557	1.5708	0.785398	0.074387	0.757747	0.0563665
238	0.0747699	1.5708	0.785398	0.0747003	0.757952	0.0566192
239	0.0750841	1.5708	0.785398	0.0750135	0.758157	0.056872
240	0.0753982	1.5708	0.785398	0.0753268	0.758362	0.057125
241	0.0757124	1.5708	0.785398	0.0756401	0.758567	0.057378
242	0.0760265	1.5708	0.785398	0.0759533	0.758771	0.0576312
243	0.0763407	1.5708	0.785398	0.0762666	0.758976	0.0578845
244	0.0766549	1.5708	0.785398	0.0765798	0.75918	0.0581379
245	0.076969	1.5708	0.785398	0.076893	0.759385	0.0583914
246	0.0772832	1.5708	0.785398	0.0772063	0.759589	0.0586451
247	0.0775973	1.5708	0.785398	0.0775195	0.759794	0.0588988
248	0.0779115	1.5708	0.785398	0.0778327	0.759998	0.0591527
249	0.0782257	1.5708	0.785398	0.0781459	0.760202	0.0594067
250	0.0785398	1.5708	0.785398	0.0784591	0.760406	0.0596608
251	0.078854	1.5708	0.785398	0.0787723	0.76061	0.059915
252	0.0791681	1.5708	0.785398	0.0790855	0.760814	0.0601693
253	0.0794823	1.5708	0.785398	0.0793986	0.761018	0.0604238
254	0.0797965	1.5708	0.785398	0.0797118	0.761221	0.0606783
255	0.0801106	1.5708	0.785398	0.080025	0.761425	0.060933
256	0.0804248	1.5708	0.785398	0.0803381	0.761629	0.0611878
257	0.0807389	1.5708	0.785398	0.0806512	0.761832	0.0614427
258	0.0810531	1.5708	0.785398	0.0809644	0.762036	0.0616978
259	0.0813672	1.5708	0.785398	0.0812775	0.762239	0.0619529
260	0.0816814	1.5708	0.785398	0.0815906	0.762443	0.0622082
261	0.0819956	1.5708	0.785398	0.0819037	0.762646	0.0624635
262	0.0823097	1.5708	0.785398	0.0822168	0.762849	0.062719
263	0.0826239	1.5708	0.785398	0.0825299	0.763052	0.0629746
264	0.082938	1.5708	0.785398	0.082843	0.763255	0.0632303
265	0.0832522	1.5708	0.785398	0.0831561	0.763458	0.0634862
266	0.0835664	1.5708	0.785398	0.0834691	0.763661	0.0637421
267	0.0838805	1.5708	0.785398	0.0837822	0.763864	0.0639982
268	0.0841947	1.5708	0.785398	0.0840952	0.764066	0.0642543
269	0.0845088	1.5708	0.785398	0.0844083	0.764269	0.0645106
270	0.084823	1.5708	0.785398	0.0847213	0.764472	0.064767
271	0.0851372	1.5708	0.785398	0.0850343	0.764674	0.0650236
272	0.0854513	1.5708	0.785398	0.0853474	0.764876	0.0652802
273	0.0857655	1.5708	0.785398	0.0856604	0.765079	0.0655369
274	0.0860796	1.5708	0.785398	0.0859734	0.765281	0.0657938
275	0.0863938	1.5708	0.785398	0.0862864	0.765483	0.0660508
276	0.086708	1.5708	0.785398	0.0865993	0.765685	0.0663079
277	0.0870221	1.5708	0.785398	0.0869123	0.765887	0.0665651
278	0.0873363	1.5708	0.785398	0.0872253	0.766089	0.0668224
279	0.0876504	1.5708	0.785398	0.0875382	0.766291	0.0670798
280	0.0879646	1.5708	0.785398	0.0878512	0.766493	0.0673373
281	0.0882788	1.5708	0.785398	0.0881641	0.766695	0.067595
282	0.0885929	1.5708	0.785398	0.0884771	0.766896	0.0678527
283	0.0889071	1.5708	0.785398	0.08879	0.767098	0.0681106
284	0.0892212	1.5708	0.785398	0.0891029	0.767299	0.0683686
285	0.0895354	1.5708	0.785398	0.0894158	0.767501	0.0686267
286	0.0898495	1.5708	0.785398	0.0897287	0.767702	0.0688849
287	0.0901637	1.5708	0.785398	0.0900416	0.767904	0.0691433
288	0.0904779	1.5708	0.785398	0.0903545	0.768105	0.0694017
289	0.090792	1.5708	0.785398	0.0906673	0.768306	0.0696603
290	0.0911062	1.5708	0.785398	0.0909802	0.768507	0.0699189
291	0.0914203	1.5708	0.785398	0.0912931	0.768708	0.0701777
292	0.0917345	1.5708	0.785398	0.0916059	0.768909	0.0704366
293	0.0920487	1.5708	0.785398	0.0919187	0.76911	0.0706956
294	0.0923628	1.5708	0.785398	0.0922316	0.76931	0.0709547
295	0.092677	1.5708	0.785398	0.0925444	0.769511	0.0712139
296	0.0929911	1.5708	0.785398	0.0928572	0.769712	0.0714733
297	0.0933053	1.5708	0.785398	0.09317	0.769912	0.0717327
298	0.0936195	1.5708	0.785398	0.0934828	0.770113	0.0719923
299	0.0939336	1.5708	0.785398	0.0937955	0.770313	0.0722519
300	0.0942478	1.5708	0.785398	0.0941083	0.770513	0.0725117
301	0.0945619	1.5708	0.785398	0.0944211	0.770713	0.0727716
302	0.0948761	1.5708	0.785398	0.0947338	0.770914	0.0730316
303	0.0951903	1.5708	0.785398	0.0950466	0.771114	0.0732917
304	0.0955044	1.5708	0.785398	0.0953593	0.771314	0.0735519
305	0.0958186	1.5708	0.785398	0.095672	0.771514	0.0738123
306	0.0961327	1.5708	0.785398	0.0959847	0.771713	0.0740727
307	0.0964469	1.5708	0.785398	0.0962974	0.771913	0.0743333
308	0.0967611	1.5708	0.785398	0.0966101	0.772113	0.0745939
309	0.0970752	1.5708	0.785398	0.0969228	0.772312	0.0748547
310	0.0973894	1.5708	0.785398	0.0972355	0.772512	0.0751156
311	0.0977035	1.5708	0.785398	0.0975482	0.772711	0.0753766
312	0.0980177	1.5708	0.785398	0.0978608	0.772911	0.0756377
313	0.0983319	1.5708	0.785398	0.0981735	0.77311	0.0758989
314	0.098646	1.5708	0.785398	0.0984861	0.773309	0.0761602
315	0.0989602	1.5708	0.785398	0.0987987	0.773508	0.0764217
316	0.0992743	1.5708	0.785398	0.0991113	0.773708	0.0766832
317	0.0995885	1.5708	0.785398	0.099424	0.773907	0.0769448
318	0.0999026	1.5708	0.785398	0.0997365	0.774105	0.0772066
319	0.100217	1.5708	0.785398	0.100049	0.774304	0.0774685
320	0.100531	1.5708	0.785398	0.100362	0.774503	0.0777305
321	0.100845	1.5708	0.785398	0.100674	0.774702	0.0779925
322	0.101159	1.5708	0.785398	0.100987	0.7749	0.0782547
323	0.101473	1.5708	0.785398	0.101299	0.775099	0.078517
324	0.101788	1.5708	0.785398	0.101612	0.775297	0.0787795
325	0.102102	1.5708	0.785398	0.101924	0.775496	0.079042
326	0.102416	1.5708	0.785398	0.102237	0.775694	0.0793046
327	0.10273	1.5708	0.785398	0.102549	0.775892	0.0795674
328	0.103044	1.5708	0.785398	0.102862	0.77609	0.0798302
329	0.103358	1.5708	0.785398	0.103174	0.776289	0.0800932
330	0.103673	1.5708	0.785398	0.103487	0.776487	0.0803562
331	0.103987	1.5708	0.785398	0.103799	0.776684	0.0806194
332	0.104301	1.5708	0.785398	0.104112	0.776882	0.0808827
333	0.104615	1.5708	0.785398	0.104424	0.77708	0.0811461
334	0.104929	1.5708	0.785398	0.104737	0.777278	0.0814095
335	0.105243	1.5708	0.785398	0.105049	0.777475	0.0816731
336	0.105558	1.5708	0.785398	0.105362	0.777673	0.0819369
337	0.105872	1.5708	0.785398	0.105674	0.77787	0.0822007
338	0.106186	1.5708	0.785398	0.105986	0.778068	0.0824646
339	0.1065	1.5708	0.785398	0.106299	0.778265	0.0827286
340	0.106814	1.5708	0.785398	0.106611	0.778462	0.0829928
341	0.107128	1.5708	0.785398	0.106924	0.778659	0.083257
342	0.107442	1.5708	0.785398	0.107236	0.778857	0.0835214
343	0.107757	1.5708	0.785398	0.107548	0.779054	0.0837858
344	0.108071	1.5708	0.785398	0.107861	0.77925	0.0840504
345	0.108385	1.5708	0.785398	0.108173	0.779447	0.0843151
346	0.108699	1.5708	0.785398	0.108485	0.779644	0.0845798
347	0.109013	1.5708	0.785398	0.108797	0.779841	0.0848447
348	0.109327	1.5708	0.785398	0.10911	0.780037	0.0851097
349	0.109642	1.5708	0.785398	0.109422	0.780234	0.0853748
350	0.109956	1.5708	0.785398	0.109734	0.78043	0.08564
351	0.11027	1.5708	0.785398	0.110047	0.780627	0.0859053
352	0.110584	1.5708	0.785398	0.110359	0.780823	0.0861707
353	0.110898	1.5708	0.785398	0.110671	0.781019	0.0864362
354	0.111212	1.5708	0.785398	0.110983	0.781215	0.0867019
355	0.111527	1.5708	0.785398	0.111295	0.781412	0.0869676
356	0.111841	1.5708	0.785398	0.111608	0.781608	0.0872334
357	0.112155	1.5708	0.785398	0.11192	0.781803	0.0874994
358	0.112469	1.5708	0.785398	0.112232	0.781999	0.0877654
359	0.112783	1.5708	0.785398	0.112544	0.782195	0.0880315
360	0.113097	1.5708	0.785398	0.112856	0.782391	0.0882978
361	0.113411	1.5708	0.785398	0.113169	0.782586	0.0885642
362	0.113726	1.5708	0.785398	0.113481	0.782782	0.0888306
363	0.11404	1.5708	0.785398	0.113793	0.782977	0.0890972
364	0.114354	1.5708	0.785398	0.114105	0.783173	0.0893639
365	0.114668	1.5708	0.785398	0.114417	0.783368	0.0896306
366	0.114982	1.5708	0.785398	0.114729	0.783563	0.0898975
367	0.115296	1.5708	0.785398	0.115041	0.783758	0.0901645
368	0.115611	1.5708	0.785398	0.115353	0.783954	0.0904316
369	0.115925	1.5708	0.785398	0.115665	0.784149	0.0906988
370	0.116239	1.5708	0.785398	0.115977	0.784343	0.0909661
371	0.116553	1.5708	0.785398	0.116289	0.784538	0.0912335
372	0.116867	1.5708	0.785398	0.116601	0.784733	0.091501
373	0.117181	1.5708	0.785398	0.116913	0.784928	0.0917686
374	0.117496	1.5708	0.785398	0.117225	0.785122	0.0920363
375	0.11781	1.5708	0.785398	0.117537	0.785317	0.0923041
376	0.118124	1.5708	0.785398	0.117849	0.785511	0.092572
377	0.118438	1.5708	0.785398	0.118161	0.785706	0.09284
378	0.118752	1.5708	0.785398	0.118473	0.7859	0.0931082
379	0.119066	1.5708	0.785398	0.118785	0.786094	0.0933764
380	0.119381	1.5708	0.785398	0.119097	0.786288	0.0936447
381	0.119695	1.5708	0.785398	0.119409	0.786482	0.0939131
382	0.120009	1.5708	0.785398	0.119721	0.786676	0.0941817
383	0.120323	1.5708	0.785398	0.120033	0.78687	0.0944503
384	0.120637	1.5708	0.785398	0.120345	0.787064	0.0947191
385	0.120951	1.5708	0.785398	0.120657	0.787258	0.0949879
386	0.121265	1.5708	0.785398	0.120968	0.787452	0.0952568
387	0.12158	1.5708	0.785398	0.12128	0.787645	0.0955259
388	0.121894	1.5708	0.785398	0.121592	0.787839	0.095795
389	0.122208	1.5708	0.785398	0.121904	0.788032	0.0960643
390	0.122522	1.5708	0.785398	0.122216	0.788226	0.0963336
391	0.122836	1.5708	0.785398	0.122528	0.788419	0.0966031
392	0.12315	1.5708	0.785398	0.122839	0.788612	0.0968726
393	0.123465	1.5708	0.785398	0.123151	0.788805	0.0971423
394	0.123779	1.5708	0.785398	0.123463	0.788998	0.097412
395	0.124093	1.5708	0.785398	0.123775	0.789191	0.0976819
396	0.124407	1.5708	0.785398	0.124086	0.789384	0.0979518
397	0.124721	1.5708	0.785398	0.124398	0.789577	0.0982219
398	0.125035	1.5708	0.785398	0.12471	0.78977	0.0984921
399	0.12535	1.5708	0.785398	0.125022	0.789962	0.0987623
400	0.125664	1.5708	0.785398	0.125333	0.790155	0.0990327
401	0.125978	1.5708	0.785398	0.125645	0.790348	0.0993031
402	0.126292	1.5708	0.785398	0.125957	0.79054	0.0995737
403	0.126606	1.5708	0.785398	0.126268	0.790732	0.0998444
404	0.12692	1.5708	0.785398	0.12658	0.790925	0.100115
405	0.127235	1.5708	0.785398	0.126891	0.791117	0.100386
406	0.127549	1.5708	0.785398	0.127203	0.791309	0.100657
407	0.127863	1.5708	0.785398	0.127515	0.791501	0.100928
408	0.128177	1.5708	0.785398	0.127826	0.791693	0.101199
409	0.128491	1.5708	0.785398	0.128138	0.791885	0.10147
410	0.128805	1.5708	0.785398	0.128449	0.792077	0.101742
411	0.129119	1.5708	0.785398	0.128761	0.792268	0.102013
412	0.129434	1.5708	0.785398	0.129073	0.79246	0.102285
413	0.129748	1.5708	0.785398	0.129384	0.792652	0.102556
414	0.130062	1.5708	0.785398	0.129696	0.792843	0.102828
415	0.130376	1.5708	0.785398	0.130007	0.793034	0.1031
416	0.13069	1.5708	0.785398	0.130319	0.793226	0.103372
417	0.131004	1.5708	0.785398	0.13063	0.793417	0.103644
418	0.131319	1.5708	0.785398	0.130941	0.793608	0.103916
419	0.131633	1.5708	0.785398	0.131253	0.793799	0.104188
420	0.131947	1.5708	0.785398	0.131564	0.79399	0.104461
421	0.132261	1.5708	0.785398	0.131876	0.794181	0.104733
422	0.132575	1.5708	0.785398	0.132187	0.794372	0.105006
423	0.132889	1.5708	0.785398	0.132499	0.794563	0.105278
424	0.133204	1.5708	0.785398	0.13281	0.794754	0.105551
425	0.133518	1.5708	0.785398	0.133121	0.794944	0.105824
426	0.133832	1.5708	0.785398	0.133433	0.795135	0.106097
427	0.134146	1.5708	0.785398	0.133744	0.795325	0.10637
428	0.13446	1.5708	0.785398	0.134055	0.795516	0.106643
429	0.134774	1.5708	0.785398	0.134367	0.795706	0.106916
430	0.135088	1.5708	0.785398	0.134678	0.795896	0.10719
431	0.135403	1.5708	0.785398	0.134989	0.796087	0.107463
432	0.135717	1.5708	0.785398	0.135301	0.796277	0.107737
433	0.136031	1.5708	0.785398	0.135612	0.796467	0.10801
434	0.136345	1.5708	0.785398	0.135923	0.796657	0.108284
435	0.136659	1.5708	0.785398	0.136234	0.796846	0.108558
436	0.136973	1.5708	0.785398	0.136546	0.797036	0.108832
437	0.137288	1.5708	0.785398	0.136857	0.797226	0.109106
438	0.137602	1.5708	0.785398	0.137168	0.797415	0.10938
439	0.137916	1.5708	0.785398	0.137479	0.797605	0.109654
440	0.13823	1.5708	0.785398	0.13779	0.797794	0.109928
441	0.138544	1.5708	0.785398	0.138101	0.797984	0.110203
442	0.138858	1.5708	0.785398	0.138413	0.798173	0.110477
443	0.139173	1.5708	0.785398	0.138724	0.798362	0.110752
444	0.139487	1.5708	0.785398	0.139035	0.798551	0.111026
445	0.139801	1.5708	0.785398	0.139346	0.798741	0.111301
446	0.140115	1.5708	0.785398	0.139657	0.79893	0.111576
447	0.140429	1.5708	0.785398	0.139968	0.799118	0.111851
448	0.140743	1.5708	0.785398	0.140279	0.799307	0.112126
449	0.141058	1.5708	0.785398	0.14059	0.799496	0.112401
450	0.141372	1.5708	0.785398	0.140901	0.799685	0.112677
451	0.141686	1.5708	0.785398	0.141212	0.799873	0.112952
452	0.142	1.5708	0.785398	0.141523	0.800062	0.113227
453	0.142314	1.5708	0.785398	0.141834	0.80025	0.113503
454	0.142628	1.5708	0.785398	0.142145	0.800439	0.113779
455	0.142942	1.5708	0.785398	0.142456	0.800627	0.114054
456	0.143257	1.5708	0.785398	0.142767	0.800815	0.11433
457	0.143571	1.5708	0.785398	0.143078	0.801003	0.114606
458	0.143885	1.5708	0.785398	0.143389	0.801191	0.114882
459	0.144199	1.5708	0.785398	0.1437	0.801379	0.115158
460	0.144513	1.5708	0.785398	0.144011	0.801567	0.115434
461	0.144827	1.5708	0.785398	0.144322	0.801755	0.115711
462	0.145142	1.5708	0.785398	0.144633	0.801943	0.115987
463	0.145456	1.5708	0.785398	0.144943	0.80213	0.116263
464	0.14577	1.5708	0.785398	0.145254	0.802318	0.11654
465	0.146084	1.5708	0.785398	0.145565	0.802505	0.116817
466	0.146398	1.5708	0.785398	0.145876	0.802693	0.117093
467	0.146712	1.5708	0.785398	0.146187	0.80288	0.11737
468	0.147027	1.5708	0.785398	0.146497	0.803067	0.117647
469	0.147341	1.5708	0.785398	0.146808	0.803254	0.117924
470	0.147655	1.5708	0.785398	0.147119	0.803441	0.118201
471	0.147969	1.5708	0.785398	0.14743	0.803628	0.118479
472	0.148283	1.5708	0.785398	0.14774	0.803815	0.118756
473	0.148597	1.5708	0.785398	0.148051	0.804002	0.119033
474	0.148911	1.5708	0.785398	0.148362	0.804189	0.119311
475	0.149226	1.5708	0.785398	0.148672	0.804376	0.119588
476	0.14954	1.5708	0.785398	0.148983	0.804562	0.119866
477	0.149854	1.5708	0.785398	0.149294	0.804749	0.120144
478	0.150168	1.5708	0.785398	0.149604	0.804935	0.120422
479	0.150482	1.5708	0.785398	0.149915	0.805122	0.1207
480	0.150796	1.5708	0.785398	0.150226	0.805308	0.120978
481	0.151111	1.5708	0.785398	0.150536	0.805494	0.121256
482	0.151425	1.5708	0.785398	0.150847	0.80568	0.121534
483	0.151739	1.5708	0.785398	0.151157	0.805866	0.121813
484	0.152053	1.5708	0.785398	0.151468	0.806052	0.122091
485	0.152367	1.5708	0.785398	0.151778	0.806238	0.12237
486	0.152681	1.5708	0.785398	0.152089	0.806424	0.122648
487	0.152996	1.5708	0.785398	0.152399	0.80661	0.122927
488	0.15331	1.5708	0.785398	0.15271	0.806795	0.123206
489	0.153624	1.5708	0.785398	0.15302	0.806981	0.123484
490	0.153938	1.5708	0.785398	0.153331	0.807166	0.123763
491	0.154252	1.5708	0.785398	0.153641	0.807352	0.124043
492	0.154566	1.5708	0.785398	0.153952	0.807537	0.124322
493	0.154881	1.5708	0.785398	0.154262	0.807722	0.124601
494	0.155195	1.5708	0.785398	0.154572	0.807908	0.12488
495	0.155509	1.5708	0.785398	0.154883	0.808093	0.12516
496	0.155823	1.5708	0.785398	0.155193	0.808278	0.125439
497	0.156137	1.5708	0.785398	0.155504	0.808463	0.125719
498	0.156451	1.5708	0.785398	0.155814	0.808648	0.125998
499	0.156765	1.5708	0.785398	0.156124	0.808832	0.126278
500	0.15708	1.5708	0.785398	0.156434	0.809017	0.126558
501	0.157394	1.5708	0.785398	0.156745	0.809202	0.126838
502	0.157708	1.5708	0.785398	0.157055	0.809386	0.127118
503	0.158022	1.5708	0.785398	0.157365	0.809571	0.127398
504	0.158336	1.5708	0.785398	0.157676	0.809755	0.127679
505	0.15865	1.5708	0.785398	0.157986	0.809939	0.127959
506	0.158965	1.5708	0.785398	0.158296	0.810124	0.128239
507	0.159279	1.5708	0.785398	0.158606	0.810308	0.12852
508	0.159593	1.5708	0.785398	0.158916	0.810492	0.1288
509	0.159907	1.5708	0.785398	0.159226	0.810676	0.129081
510	0.160221	1.5708	0.785398	0.159537	0.81086	0.129362
511	0.160535	1.5708	0.785398	0.159847	0.811043	0.129643
512	0.16085	1.5708	0.785398	0.160157	0.811227	0.129924
513	0.161164	1.5708	0.785398	0.160467	0.811411	0.130205
514	0.161478	1.5708	0.785398	0.160777	0.811594	0.130486
515	0.161792	1.5708	0.785398	0.161087	0.811778	0.130767
516	0.162106	1.5708	0.785398	0.161397	0.811961	0.131048
517	0.16242	1.5708	0.785398	0.161707	0.812145	0.13133
518	0.162734	1.5708	0.785398	0.162017	0.812328	0.131611
519	0.163049	1.5708	0.785398	0.162327	0.812511	0.131893
520	0.163363	1.5708	0.785398	0.162637	0.812694	0.132174
521	0.163677	1.5708	0.785398	0.162947	0.812877	0.132456
522	0.163991	1.5708	0.785398	0.163257	0.81306	0.132738
523	0.164305	1.5708	0.785398	0.163567	0.813243	0.13302
524	0.164619	1.5708	0.785398	0.163877	0.813426	0.133302
525	0.164934	1.5708	0.785398	0.164187	0.813608	0.133584
526	0.165248	1.5708	0.785398	0.164497	0.813791	0.133866
527	0.165562	1.5708	0.785398	0.164807	0.813974	0.134148
528	0.165876	1.5708	0.785398	0.165116	0.814156	0.134431
529	0.16619	1.5708	0.785398	0.165426	0.814338	0.134713
530	0.166504	1.5708	0.785398	0.165736	0.814521	0.134996
531	0.166819	1.5708	0.785398	0.166046	0.814703	0.135278
532	0.167133	1.5708	0.785398	0.166356	0.814885	0.135561
533	0.167447	1.5708	0.785398	0.166665	0.815067	0.135844
534	0.167761	1.5708	0.785398	0.166975	0.815249	0.136126
535	0.168075	1.5708	0.785398	0.167285	0.815431	0.136409
536	0.168389	1.5708	0.785398	0.167595	0.815613	0.136692
537	0.168704	1.5708	0.785398	0.167904	0.815795	0.136976
538	0.169018	1.5708	0.785398	0.168214	0.815976	0.137259
539	0.169332	1.5708	0.785398	0.168524	0.816158	0.137542
540	0.169646	1.5708	0.785398	0.168833	0.816339	0.137825
541	0.16996	1.5708	0.785398	0.169143	0.816521	0.138109
542	0.170274	1.5708	0.785398	0.169453	0.816702	0.138392
543	0.170588	1.5708	0.785398	0.169762	0.816883	0.138676
544	0.170903	1.5708	0.785398	0.170072	0.817064	0.13896
545	0.171217	1.5708	0.785398	0.170381	0.817245	0.139243
546	0.171531	1.5708	0.785398	0.170691	0.817426	0.139527
547	0.171845	1.5708	0.785398	0.171001	0.817607	0.139811
548	0.172159	1.5708	0.785398	0.17131	0.817788	0.140095
549	0.172473	1.5708	0.785398	0.17162	0.817969	0.14038
550	0.172788	1.5708	0.785398	0.171929	0.81815	0.140664
551	0.173102	1.5708	0.785398	0.172239	0.81833	0.140948
552	0.173416	1.5708	0.785398	0.172548	0.818511	0.141232
553	0.17373	1.5708	0.785398	0.172857	0.818691	0.141517
554	0.174044	1.5708	0.785398	0.173167	0.818872	0.141801
555	0.174358	1.5708	0.785398	0.173476	0.819052	0.142086
556	0.174673	1.5708	0.785398	0.173786	0.819232	0.142371
557	0.174987	1.5708	0.785398	0.174095	0.819412	0.142656
558	0.175301	1.5708	0.785398	0.174404	0.819592	0.142941
559	0.175615	1.5708	0.785398	0.174714	0.819772	0.143225
560	0.175929	1.5708	0.785398	0.175023	0.819952	0.143511
561	0.176243	1.5708	0.785398	0.175332	0.820132	0.143796
562	0.176558	1.5708	0.785398	0.175642	0.820312	0.144081
563	0.176872	1.5708	0.785398	0.175951	0.820491	0.144366
564	0.177186	1.5708	0.785398	0.17626	0.820671	0.144652
565	0.1775	1.5708	0.785398	0.176569	0.82085	0.144937
566	0.177814	1.5708	0.785398	0.176879	0.82103	0.145223
567	0.178128	1.5708	0.785398	0.177188	0.821209	0.145508
568	0.178442	1.5708	0.785398	0.177497	0.821388	0.145794
569	0.178757	1.5708	0.785398	0.177806	0.821567	0.14608
570	0.179071	1.5708	0.785398	0.178115	0.821746	0.146366
571	0.179385	1.5708	0.785398	0.178424	0.821925	0.146652
572	0.179699	1.5708	0.785398	0.178734	0.822104	0.146938
573	0.180013	1.5708	0.785398	0.179043	0.822283	0.147224
574	0.180327	1.5708	0.785398	0.179352	0.822462	0.14751
575	0.180642	1.5708	0.785398	0.179661	0.822641	0.147796
576	0.180956	1.5708	0.785398	0.17997	0.822819	0.148083
577	0.18127	1.5708	0.785398	0.180279	0.822998	0.148369
578	0.181584	1.5708	0.785398	0.180588	0.823176	0.148656
579	0.181898	1.5708	0.785398	0.180897	0.823354	0.148942
580	0.182212	1.5708	0.785398	0.181206	0.823533	0.149229
581	0.182527	1.5708	0.785398	0.181515	0.823711	0.149516
582	0.182841	1.5708	0.785398	0.181824	0.823889	0.149802
583	0.183155	1.5708	0.785398	0.182133	0.824067	0.150089
584	0.183469	1.5708	0.785398	0.182441	0.824245	0.150376
585	0.183783	1.5708	0.785398	0.18275	0.824423	0.150664
586	0.184097	1.5708	0.785398	0.183059	0.8246	0.150951
587	0.184411	1.5708	0.785398	0.183368	0.824778	0.151238
588	0.184726	1.5708	0.785398	0.183677	0.824956	0.151525
589	0.18504	1.5708	0.785398	0.183986	0.825133	0.151813
590	0.185354	1.5708	0.785398	0.184294	0.825311	0.1521
591	0.185668	1.5708	0.785398	0.184603	0.825488	0.152388
592	0.185982	1.5708	0.785398	0.184912	0.825665	0.152675
593	0.186296	1.5708	0.785398	0.185221	0.825842	0.152963
594	0.186611	1.5708	0.785398	0.185529	0.82602	0.153251
595	0.186925	1.5708	0.785398	0.185838	0.826197	0.153539
596	0.187239	1.5708	0.785398	0.186147	0.826374	0.153827
597	0.187553	1.5708	0.785398	0.186455	0.82655	0.154115
598	0.187867	1.5708	0.785398	0.186764	0.826727	0.154403
599	0.188181	1.5708	0.785398	0.187073	0.826904	0.154691
600	0.188496	1.5708	0.785398	0.187381	0.827081	0.154979
601	0.18881	1.5708	0.785398	0.18769	0.827257	0.155268
602	0.189124	1.5708	0.785398	0.187998	0.827434	0.155556
603	0.189438	1.5708	0.785398	0.188307	0.82761	0.155845
604	0.189752	1.5708	0.785398	0.188616	0.827786	0.156133
605	0.190066	1.5708	0.785398	0.188924	0.827962	0.156422
606	0.190381	1.5708	0.785398	0.189233	0.828139	0.156711
607	0.190695	1.5708	0.785398	0.189541	0.828315	0.157
608	0.191009	1.5708	0.785398	0.189849	0.828491	0.157289
609	0.191323	1.5708	0.785398	0.190158	0.828667	0.157577
610	0.191637	1.5708	0.785398	0.190466	0.828842	0.157867
611	0.191951	1.5708	0.785398	0.190775	0.829018	0.158156
612	0.192265	1.5708	0.785398	0.191083	0.829194	0.158445
613	0.19258	1.5708	0.785398	0.191391	0.829369	0.158734
614	0.192894	1.5708	0.785398	0.1917	0.829545	0.159024
615	0.193208	1.5708	0.785398	0.192008	0.82972	0.159313
616	0.193522	1.5708	0.785398	0.192316	0.829895	0.159603
617	0.193836	1.5708	0.785398	0.192625	0.830071	0.159892
618	0.19415	1.5708	0.785398	0.192933	0.830246	0.160182
619	0.194465	1.5708	0.785398	0.193241	0.830421	0.160472
620	0.194779	1.5708	0.785398	0.193549	0.830596	0.160761
621	0.195093	1.5708	0.785398	0.193858	0.830771	0.161051
622	0.195407	1.5708	0.785398	0.194166	0.830946	0.161341
623	0.195721	1.5708	0.785398	0.194474	0.83112	0.161631
624	0.196035	1.5708	0.785398	0.194782	0.831295	0.161921
625	0.19635	1.5708	0.785398	0.19509	0.83147	0.162212
626	0.196664	1.5708	0.785398	0.195398	0.831644	0.162502
627	0.196978	1.5708	0.785398	0.195707	0.831819	0.162792
628	0.197292	1.5708	0.785398	0.196015	0.831993	0.163083
629	0.197606	1.5708	0.785398	0.196323	0.832167	0.163373
630	0.19792	1.5708	0.785398	0.196631	0.832341	0.163664
631	0.198234	1.5708	0.785398	0.196939	0.832515	0.163955
632	0.198549	1.5708	0.785398	0.197247	0.832689	0.164245
633	0.198863	1.5708	0.785398	0.197555	0.832863	0.164536
634	0.199177	1.5708	0.785398	0.197863	0.833037	0.164827
635	0.199491	1.5708	0.785398	0.198171	0.833211	0.165118
636	0.199805	1.5708	0.785398	0.198479	0.833385	0.165409
637	0.200119	1.5708	0.785398	0.198786	0.833558	0.1657
638	0.200434	1.5708	0.785398	0.199094	0.833732	0.165991
639	0.200748	1.5708	0.785398	0.199402	0.833905	0.166282
640	0.201062	1.5708	0.785398	0.19971	0.834078	0.166574
641	0.201376	1.5708	0.785398	0.200018	0.834252	0.166865
642	0.20169	1.5708	0.785398	0.200326	0.834425	0.167157
643	0.202004	1.5708	0.785398	0.200633	0.834598	0.167448
644	0.202319	1.5708	0.785398	0.200941	0.834771	0.16774
645	0.202633	1.5708	0.785398	0.201249	0.834944	0.168032
646	0.202947	1.5708	0.785398	0.201557	0.835117	0.168323
647	0.203261	1.5708	0.785398	0.201864	0.83529	0.168615
648	0.203575	1.5708	0.785398	0.202172	0.835462	0.168907
649	0.203889	1.5708	0.785398	0.20248	0.835635	0.169199
650	0.204204	1.5708	0.785398	0.202787	0.835807	0.169491
651	0.204518	1.5708	0.785398	0.203095	0.83598	0.169783
652	0.204832	1.5708	0.785398	0.203403	0.836152	0.170075
653	0.205146	1.5708	0.785398	0.20371	0.836324	0.170368
654	0.20546	1.5708	0.785398	0.204018	0.836497	0.17066
655	0.205774	1.5708	0.785398	0.204325	0.836669	0.170953
656	0.206088	1.5708	0.785398	0.204633	0.836841	0.171245
657	0.206403	1.5708	0.785398	0.20494	0.837013	0.171538
658	0.206717	1.5708	0.785398	0.205248	0.837185	0.17183
659	0.207031	1.5708	0.785398	0.205555	0.837356	0.172123
660	0.207345	1.5708	0.785398	0.205863	0.837528	0.172416
661	0.207659	1.5708	0.785398	0.20617	0.8377	0.172709
662	0.207973	1.5708	0.785398	0.206477	0.837871	0.173001
663	0.208288	1.5708	0.785398	0.206785	0.838043	0.173294
664	0.208602	1.5708	0.785398	0.207092	0.838214	0.173588
665	0.208916	1.5708	0.785398	0.2074	0.838385	0.173881
666	0.20923	1.5708	0.785398	0.207707	0.838556	0.174174
667	0.209544	1.5708	0.785398	0.208014	0.838728	0.174467
668	0.209858	1.5708	0.785398	0.208321	0.838899	0.174761
669	0.210173	1.5708	0.785398	0.208629	0.83907	0.175054
670	0.210487	1.5708	0.785398	0.208936	0.83924	0.175347
671	0.210801	1.5708	0.785398	0.209243	0.839411	0.175641
672	0.211115	1.5708	0.785398	0.20955	0.839582	0.175935
673	0.211429	1.5708	0.785398	0.209857	0.839753	0.176228
674	0.211743	1.5708	0.785398	0.210165	0.839923	0.176522
675	0.212058	1.5708	0.785398	0.210472	0.840094	0.176816
676	0.212372	1.5708	0.785398	0.210779	0.840264	0.17711
677	0.212686	1.5708	0.785398	0.211086	0.840434	0.177404
678	0.213	1.5708	0.785398	0.211393	0.840604	0.177698
679	0.213314	1.5708	0.785398	0.2117	0.840775	0.177992
680	0.213628	1.5708	0.785398	0.212007	0.840945	0.178286
681	0.213942	1.5708	0.785398	0.212314	0.841115	0.17858
682	0.214257	1.5708	0.785398	0.212621	0.841284	0.178875
683	0.214571	1.5708	0.785398	0.212928	0.841454	0.179169
684	0.214885	1.5708	0.785398	0.213235	0.841624	0.179464
685	0.215199	1.5708	0.785398	0.213542	0.841794	0.179758
686	0.215513	1.5708	0.785398	0.213849	0.841963	0.180053
687	0.215827	1.5708	0.785398	0.214156	0.842133	0.180347
688	0.216142	1.5708	0.785398	0.214463	0.842302	0.180642
689	0.216456	1.5708	0.785398	0.214769	0.842471	0.180937
690	0.21677	1.5708	0.785398	0.215076	0.84264	0.181232
691	0.217084	1.5708	0.785398	0.215383	0.84281	0.181527
692	0.217398	1.5708	0.785398	0.21569	0.842979	0.181822
693	0.217712	1.5708	0.785398	0.215997	0.843148	0.182117
694	0.218027	1.5708	0.785398	0.216303	0.843316	0.182412
695	0.218341	1.5708	0.785398	0.21661	0.843485	0.182707
696	0.218655	1.5708	0.785398	0.216917	0.843654	0.183003
697	0.218969	1.5708	0.785398	0.217223	0.843823	0.183298
698	0.219283	1.5708	0.785398	0.21753	0.843991	0.183593
699	0.219597	1.5708	0.785398	0.217837	0.84416	0.183889
700	0.219911	1.5708	0.785398	0.218143	0.844328	0.184184
701	0.220226	1.5708	0.785398	0.21845	0.844496	0.18448
702	0.22054	1.5708	0.785398	0.218756	0.844664	0.184776
703	0.220854	1.5708	0.785398	0.219063	0.844833	0.185071
704	0.221168	1.5708	0.785398	0.219369	0.845001	0.185367
705	0.221482	1.5708	0.785398	0.219676	0.845169	0.185663
706	0.221796	1.5708	0.785398	0.219982	0.845336	0.185959
707	0.222111	1.5708	0.785398	0.220289	0.845504	0.186255
708	0.222425	1.5708	0.785398	0.220595	0.845672	0.186551
709	0.222739	1.5708	0.785398	0.220902	0.84584	0.186847
710	0.223053	1.5708	0.785398	0.221208	0.846007	0.187144
711	0.223367	1.5708	0.785398	0.221514	0.846175	0.18744
712	0.223681	1.5708	0.785398	0.221821	0.846342	0.187736
713	0.223996	1.5708	0.785398	0.222127	0.846509	0.188033
714	0.22431	1.5708	0.785398	0.222433	0.846676	0.188329
715	0.224624	1.5708	0.785398	0.22274	0.846844	0.188626
716	0.224938	1.5708	0.785398	0.223046	0.847011	0.188922
717	0.225252	1.5708	0.785398	0.223352	0.847178	0.189219
718	0.225566	1.5708	0.785398	0.223658	0.847344	0.189516
719	0.225881	1.5708	0.785398	0.223965	0.847511	0.189813
720	0.226195	1.5708	0.785398	0.224271	0.847678	0.190109
721	0.226509	1.5708	0.785398	0.224577	0.847845	0.190406
722	0.226823	1.5708	0.785398	0.224883	0.848011	0.190703
723	0.227137	1.5708	0.785398	0.225189	0.848178	0.191
724	0.227451	1.5708	0.785398	0.225495	0.848344	0.191297
725	0.227765	1.5708	0.785398	0.225801	0.84851	0.191595
726	0.22808	1.5708	0.785398	0.226107	0.848676	0.191892
727	0.228394	1.5708	0.785398	0.226413	0.848843	0.192189
728	0.228708	1.5708	0.785398	0.226719	0.849009	0.192487
729	0.229022	1.5708	0.785398	0.227025	0.849175	0.192784
730	0.229336	1.5708	0.785398	0.227331	0.84934	0.193082
731	0.22965	1.5708	0.785398	0.227637	0.849506	0.193379
732	0.229965	1.5708	0.785398	0.227943	0.849672	0.193677
733	0.230279	1.5708	0.785398	0.228249	0.849838	0.193974
734	0.230593	1.5708	0.785398	0.228555	0.850003	0.194272
735	0.230907	1.5708	0.785398	0.228861	0.850168	0.19457
736	0.231221	1.5708	0.785398	0.229166	0.850334	0.194868
737	0.231535	1.5708	0.785398	0.229472	0.850499	0.195166
738	0.23185	1.5708	0.785398	0.229778	0.850664	0.195464
739	0.232164	1.5708	0.785398	0.230084	0.850829	0.195762
740	0.232478	1.5708	0.785398	0.230389	0.850994	0.19606
741	0.232792	1.5708	0.785398	0.230695	0.851159	0.196358
742	0.233106	1.5708	0.785398	0.231001	0.851324	0.196657
743	0.23342	1.5708	0.785398	0.231306	0.851489	0.196955
744	0.233734	1.5708	0.785398	0.231612	0.851654	0.197253
745	0.234049	1.5708	0.785398	0.231918	0.851818	0.197552
746	0.234363	1.5708	0.785398	0.232223	0.851983	0.19785
747	0.234677	1.5708	0.785398	0.232529	0.852147	0.198149
748	0.234991	1.5708	0.785398	0.232834	0.852312	0.198447
749	0.235305	1.5708	0.785398	0.23314	0.852476	0.198746
750	0.235619	1.5708	0.785398	0.233445	0.85264	0.199045
751	0.235934	1.5708	0.785398	0.233751	0.852804	0.199344
752	0.236248	1.5708	0.785398	0.234056	0.852968	0.199643
753	0.236562	1.5708	0.785398	0.234362	0.853132	0.199942
754	0.236876	1.5708	0.785398	0.234667	0.853296	0.200241
755	0.23719	1.5708	0.785398	0.234972	0.85346	0.20054
756	0.237504	1.5708	0.785398	0.235278	0.853624	0.200839
757	0.237819	1.5708	0.785398	0.235583	0.853787	0.201138
758	0.238133	1.5708	0.785398	0.235888	0.853951	0.201437
759	0.238447	1.5708	0.785398	0.236194	0.854114	0.201736
760	0.238761	1.5708	0.785398	0.236499	0.854277	0.202036
761	0.239075	1.5708	0.785398	0.236804	0.854441	0.202335
762	0.239389	1.5708	0.785398	0.237109	0.854604	0.202635
763	0.239704	1.5708	0.785398	0.237415	0.854767	0.202934
764	0.240018	1.5708	0.785398	0.23772	0.85493	0.203234
765	0.240332	1.5708	0.785398	0.238025	0.855093	0.203533
766	0.240646	1.5708	0.785398	0.23833	0.855256	0.203833
767	0.24096	1.5708	0.785398	0.238635	0.855419	0.204133
768	0.241274	1.5708	0.785398	0.23894	0.855581	0.204433
769	0.241588	1.5708	0.785398	0.239245	0.855744	0.204733
770	0.241903	1.5708	0.785398	0.23955	0.855906	0.205033
771	0.242217	1.5708	0.785398	0.239855	0.856069	0.205333
772	0.242531	1.5708	0.785398	0.24016	0.856231	0.205633
773	0.242845	1.5708	0.785398	0.240465	0.856393	0.205933
774	0.243159	1.5708	0.785398	0.24077	0.856555	0.206233
775	0.243473	1.5708	0.785398	0.241075	0.856718	0.206533
776	0.243788	1.5708	0.785398	0.24138	0.85688	0.206834
777	0.244102	1.5708	0.785398	0.241685	0.857041	0.207134
778	0.244416	1.5708	0.785398	0.24199	0.857203	0.207434
779	0.24473	1.5708	0.785398	0.242294	0.857365	0.207735
780	0.245044	1.5708	0.785398	0.242599	0.857527	0.208035
781	0.245358	1.5708	0.785398	0.242904	0.857688	0.208336
782	0.245673	1.5708	0.785398	0.243209	0.85785	0.208637
783	0.245987	1.5708	0.785398	0.243513	0.858011	0.208937
784	0.246301	1.5708	0.785398	0.243818	0.858172	0.209238
785	0.246615	1.5708	0.785398	0.244123	0.858334	0.209539
786	0.246929	1.5708	0.785398	0.244427	0.858495	0.20984
787	0.247243	1.5708	0.785398	0.244732	0.858656	0.210141
788	0.247558	1.5708	0.785398	0.245037	0.858817	0.210442
789	0.247872	1.5708	0.785398	0.245341	0.858978	0.210743
790	0.248186	1.5708	0.785398	0.245646	0.859139	0.211044
791	0.2485	1.5708	0.785398	0.24595	0.859299	0.211345
792	0.248814	1.5708	0.785398	0.246255	0.85946	0.211646
793	0.249128	1.5708	0.785398	0.246559	0.859621	0.211947
794	0.249442	1.5708	0.785398	0.246864	0.859781	0.212249
795	0.249757	1.5708	0.785398	0.247168	0.859941	0.21255
796	0.250071	1.5708	0.785398	0.247473	0.860102	0.212852
797	0.250385	1.5708	0.785398	0.247777	0.860262	0.213153
798	0.250699	1.5708	0.785398	0.248081	0.860422	0.213455
799	0.251013	1.5708	0.785398	0.248386	0.860582	0.213756
800	0.251327	1.5708	0.785398	0.24869	0.860742	0.214058
801	0.251642	1.5708	0.785398	0.248994	0.860902	0.21436
802	0.251956	1.5708	0.785398	0.249298	0.861062	0.214661
803	0.25227	1.5708	0.785398	0.249603	0.861221	0.214963
804	0.252584	1.5708	0.785398	0.249907	0.861381	0.215265
805	0.252898	1.5708	0.785398	0.250211	0.861541	0.215567
806	0.253212	1.5708	0.785398	0.250515	0.8617	0.215869
807	0.253527	1.5708	0.785398	0.250819	0.861859	0.216171
808	0.253841	1.5708	0.785398	0.251123	0.862019	0.216473
809	0.254155	1.5708	0.785398	0.251427	0.862178	0.216775
810	0.254469	1.5708	0.785398	0.251732	0.862337	0.217077
811	0.254783	1.5708	0.785398	0.252036	0.862496	0.21738
812	0.255097	1.5708	0.785398	0.25234	0.862655	0.217682
813	0.255411	1.5708	0.785398	0.252644	0.862814	0.217984
814	0.255726	1.5708	0.785398	0.252948	0.862973	0.218287
815	0.25604	1.5708	0.785398	0.253251	0.863131	0.218589
816	0.256354	1.5708	0.785398	0.253555	0.86329	0.218892
817	0.256668	1.5708	0.785398	0.253859	0.863448	0.219194
818	0.256982	1.5708	0.785398	0.254163	0.863607	0.219497
819	0.257296	1.5708	0.785398	0.254467	0.863765	0.2198
820	0.257611	1.5708	0.785398	0.254771	0.863923	0.220102
821	0.257925	1.5708	0.785398	0.255075	0.864082	0.220405
822	0.258239	1.5708	0.785398	0.255378	0.86424	0.220708
823	0.258553	1.5708	0.785398	0.255682	0.864398	0.221011
824	0.258867	1.5708	0.785398	0.255986	0.864556	0.221314
825	0.259181	1.5708	0.785398	0.256289	0.864713	0.221617
826	0.259496	1.5708	0.785398	0.256593	0.864871	0.22192
827	0.25981	1.5708	0.785398	0.256897	0.865029	0.222223
828	0.260124	1.5708	0.785398	0.2572	0.865186	0.222526
829	0.260438	1.5708	0.785398	0.257504	0.865344	0.222829
830	0.260752	1.5708	0.785398	0.257807	0.865501	0.223133
831	0.261066	1.5708	0.785398	0.258111	0.865659	0.223436
832	0.261381	1.5708	0.785398	0.258414	0.865816	0.223739
833	0.261695	1.5708	0.785398	0.258718	0.865973	0.224043
834	0.262009	1.5708	0.785398	0.259021	0.86613	0.224346
835	0.262323	1.5708	0.785398	0.259325	0.866287	0.22465
836	0.262637	1.5708	0.785398	0.259628	0.866444	0.224953
837	0.262951	1.5708	0.785398	0.259932	0.866601	0.225257
838	0.263265	1.5708	0.785398	0.260235	0.866758	0.225561
839	0.26358	1.5708	0.785398	0.260538	0.866914	0.225864
840	0.263894	1.5708	0.785398	0.260842	0.867071	0.226168
841	0.264208	1.5708	0.785398	0.261145	0.867227	0.226472
842	0.264522	1.5708	0.785398	0.261448	0.867384	0.226776
843	0.264836	1.5708	0.785398	0.261751	0.86754	0.22708
844	0.26515	1.5708	0.785398	0.262054	0.867696	0.227384
845	0.265465	1.5708	0.785398	0.262358	0.867852	0.227688
846	0.265779	1.5708	0.785398	0.262661	0.868008	0.227992
847	0.266093	1.5708	0.785398	0.262964	0.868164	0.228296
848	0.266407	1.5708	0.785398	0.263267	0.86832	0.2286
849	0.266721	1.5708	0.785398	0.26357	0.868476	0.228904
850	0.267035	1.5708	0.785398	0.263873	0.868632	0.229208
851	0.26735	1.5708	0.785398	0.264176	0.868787	0.229513
852	0.267664	1.5708	0.785398	0.264479	0.868943	0.229817
853	0.267978	1.5708	0.785398	0.264782	0.869098	0.230122
854	0.268292	1.5708	0.785398	0.265085	0.869253	0.230426
855	0.268606	1.5708	0.785398	0.265388	0.869409	0.230731
856	0.26892	1.5708	0.785398	0.265691	0.869564	0.231035
857	0.269234	1.5708	0.785398	0.265994	0.869719	0.23134
858	0.269549	1.5708	0.785398	0.266296	0.869874	0.231644
859	0.269863	1.5708	0.785398	0.266599	0.870029	0.231949
860	0.270177	1.5708	0.785398	0.266902	0.870184	0.232254
861	0.270491	1.5708	0.785398	0.267205	0.870339	0.232559
862	0.270805	1.5708	0.785398	0.267507	0.870493	0.232863
863	0.271119	1.5708	0.785398	0.26781	0.870648	0.233168
864	0.271434	1.5708	0.785398	0.268113	0.870802	0.233473
865	0.271748	1.5708	0.785398	0.268415	0.870957	0.233778
866	0.272062	1.5708	0.785398	0.268718	0.871111	0.234083
867	0.272376	1.5708	0.785398	0.269021	0.871265	0.234388
868	0.27269	1.5708	0.785398	0.269323	0.871419	0.234693
869	0.273004	1.5708	0.785398	0.269626	0.871573	0.234999
870	0.273319	1.5708	0.785398	0.269928	0.871727	0.235304
871	0.273633	1.5708	0.785398	0.270231	0.871881	0.235609
872	0.273947	1.5708	0.785398	0.270533	0.872035	0.235914
873	0.274261	1.5708	0.785398	0.270836	0.872189	0.23622
874	0.274575	1.5708	0.785398	0.271138	0.872342	0.236525
875	0.274889	1.5708	0.785398	0.27144	0.872496	0.236831
876	0.275204	1.5708	0.785398	0.271743	0.872649	0.237136
877	0.275518	1.5708	0.785398	0.272045	0.872803	0.237442
878	0.275832	1.5708	0.785398	0.272347	0.872956	0.237747
879	0.276146	1.5708	0.785398	0.27265	0.873109	0.238053
880	0.27646	1.5708	0.785398	0.272952	0.873262	0.238359
881	0.276774	1.5708	0.785398	0.273254	0.873415	0.238664
882	0.277088	1.5708	0.785398	0.273556	0.873568	0.23897
883	0.277403	1.5708	0.785398	0.273859	0.873721	0.239276
884	0.277717	1.5708	0.785398	0.274161	0.873874	0.239582
885	0.278031	1.5708	0.785398	0.274463	0.874027	0.239888
886	0.278345	1.5708	0.785398	0.274765	0.874179	0.240194
887	0.278659	1.5708	0.785398	0.275067	0.874332	0.2405
888	0.278973	1.5708	0.785398	0.275369	0.874484	0.240806
889	0.279288	1.5708	0.785398	0.275671	0.874637	0.241112
890	0.279602	1.5708	0.785398	0.275973	0.874789	0.241418
891	0.279916	1.5708	0.785398	0.276275	0.874941	0.241724
892	0.28023	1.5708	0.785398	0.276577	0.875093	0.24203
893	0.280544	1.5708	0.785398	0.276879	0.875245	0.242337
894	0.280858	1.5708	0.785398	0.277181	0.875397	0.242643
895	0.281173	1.5708	0.785398	0.277482	0.875549	0.242949
896	0.281487	1.5708	0.785398	0.277784	0.875701	0.243256
897	0.281801	1.5708	0.785398	0.278086	0.875852	0.243562
898	0.282115	1.5708	0.785398	0.278388	0.876004	0.243869
899	0.282429	1.5708	0.785398	0.278689	0.876155	0.244175
900	0.282743	1.5708	0.785398	0.278991	0.876307	0.244482
901	0.283057	1.5708	0.785398	0.279293	0.876458	0.244788
902	0.283372	1.5708	0.785398	0.279594	0.876609	0.245095
903	0.283686	1.5708	0.785398	0.279896	0.87676	0.245402
904	0.284	1.5708	0.785398	0.280198	0.876911	0.245708
905	0.284314	1.5708	0.785398	0.280499	0.877062	0.246015
906	0.284628	1.5708	0.785398	0.280801	0.877213	0.246322
907	0.284942	1.5708	0.785398	0.281102	0.877364	0.246629
908	0.285257	1.5708	0.785398	0.281404	0.877515	0.246936
909	0.285571	1.5708	0.785398	0.281705	0.877665	0.247243
910	0.285885	1.5708	0.785398	0.282007	0.877816	0.24755
911	0.286199	1.5708	0.785398	0.282308	0.877966	0.247857
912	0.286513	1.5708	0.785398	0.282609	0.878117	0.248164
913	0.286827	1.5708	0.785398	0.282911	0.878267	0.248471
914	0.287142	1.5708	0.785398	0.283212	0.878417	0.248778
915	0.287456	1.5708	0.785398	0.283513	0.878567	0.249085
916	0.28777	1.5708	0.785398	0.283815	0.878717	0.249393
917	0.288084	1.5708	0.785398	0.284116	0.878867	0.2497
918	0.288398	1.5708	0.785398	0.284417	0.879017	0.250007
919	0.288712	1.5708	0.785398	0.284718	0.879167	0.250315
920	0.289027	1.5708	0.785398	0.285019	0.879316	0.250622
921	0.289341	1.5708	0.785398	0.28532	0.879466	0.25093
922	0.289655	1.5708	0.785398	0.285621	0.879615	0.251237
923	0.289969	1.5708	0.785398	0.285923	0.879765	0.251545
924	0.290283	1.5708	0.785398	0.286224	0.879914	0.251852
925	0.290597	1.5708	0.785398	0.286525	0.880063	0.25216
926	0.290911	1.5708	0.785398	0.286826	0.880212	0.252467
927	0.291226	1.5708	0.785398	0.287126	0.880361	0.252775
928	0.29154	1.5708	0.785398	0.287427	0.88051	0.253083
929	0.291854	1.5708	0.785398	0.287728	0.880659	0.253391
930	0.292168	1.5708	0.785398	0.288029	0.880808	0.253698
931	0.292482	1.5708	0.785398	0.28833	0.880957	0.254006
932	0.292796	1.5708	0.785398	0.288631	0.881105	0.254314
933	0.293111	1.5708	0.785398	0.288932	0.881254	0.254622
934	0.293425	1.5708	0.785398	0.289232	0.881402	0.25493
935	0.293739	1.5708	0.785398	0.289533	0.881551	0.255238
936	0.294053	1.5708	0.785398	0.289834	0.881699	0.255546
937	0.294367	1.5708	0.785398	0.290134	0.881847	0.255854
938	0.294681	1.5708	0.785398	0.290435	0.881995	0.256162
939	0.294996	1.5708	0.785398	0.290736	0.882143	0.25647
940	0.29531	1.5708	0.785398	0.291036	0.882291	0.256779
941	0.295624	1.5708	0.785398	0.291337	0.882439	0.257087
942	0.295938	1.5708	0.785398	0.291637	0.882587	0.257395
943	0.296252	1.5708	0.785398	0.291938	0.882734	0.257703
944	0.296566	1.5708	0.785398	0.292238	0.882882	0.258012
945	0.296881	1.5708	0.785398	0.292539	0.88303	0.25832
946	0.297195	1.5708	0.785398	0.292839	0.883177	0.258629
947	0.297509	1.5708	0.785398	0.293139	0.883324	0.258937
948	0.297823	1.5708	0.785398	0.29344	0.883471	0.259246
949	0.298137	1.5708	0.785398	0.29374	0.883619	0.259554
950	0.298451	1.5708	0.785398	0.29404	0.883766	0.259863
951	0.298765	1.5708	0.785398	0.294341	0.883913	0.260171
952	0.29908	1.5708	0.785398	0.294641	0.884059	0.26048
953	0.299394	1.5708	0.785398	0.294941	0.884206	0.260789
954	0.299708	1.5708	0.785398	0.295241	0.884353	0.261097
955	0.300022	1.5708	0.785398	0.295541	0.8845	0.261406
956	0.300336	1.5708	0.785398	0.295841	0.884646	0.261715
957	0.30065	1.5708	0.785398	0.296142	0.884793	0.262024
958	0.300965	1.5708	0.785398	0.296442	0.884939	0.262333
959	0.301279	1.5708	0.785398	0.296742	0.885085	0.262642
960	0.301593	1.5708	0.785398	0.297042	0.885231	0.262951
961	0.301907	1.5708	0.785398	0.297342	0.885377	0.263259
962	0.302221	1.5708	0.785398	0.297641	0.885523	0.263568
963	0.302535	1.5708	0.785398	0.297941	0.885669	0.263878
964	0.30285	1.5708	0.785398	0.298241	0.885815	0.264187
965	0.303164	1.5708	0.785398	0.298541	0.885961	0.264496
966	0.303478	1.5708	0.785398	0.298841	0.886107	0.264805
967	0.303792	1.5708	0.785398	0.299141	0.886252	0.265114
968	0.304106	1.5708	0.785398	0.29944	0.886398	0.265423
969	0.30442	1.5708	0.785398	0.29974	0.886543	0.265733
970	0.304734	1.5708	0.785398	0.30004	0.886688	0.266042
971	0.305049	1.5708	0.785398	0.30034	0.886833	0.266351
972	0.305363	1.5708	0.785398	0.300639	0.886979	0.266661
973	0.305677	1.5708	0.785398	0.300939	0.887124	0.26697
974	0.305991	1.5708	0.785398	0.301238	0.887269	0.267279
975	0.306305	1.5708	0.785398	0.301538	0.887413	0.267589
976	0.306619	1.5708	0.785398	0.301837	0.887558	0.267898
977	0.306934	1.5708	0.785398	0.302137	0.887703	0.268208
978	0.307248	1.5708	0.785398	0.302436	0.887848	0.268517
979	0.307562	1.5708	0.785398	0.302736	0.887992	0.268827
980	0.307876	1.5708	0.785398	0.303035	0.888136	0.269137
981	0.30819	1.5708	0.785398	0.303335	0.888281	0.269446
982	0.308504	1.5708	0.785398	0.303634	0.888425	0.269756
983	0.308819	1.5708	0.785398	0.303933	0.888569	0.270066
984	0.309133	1.5708	0.785398	0.304233	0.888713	0.270376
985	0.309447	1.5708	0.785398	0.304532	0.888857	0.270685
986	0.309761	1.5708	0.785398	0.304831	0.889001	0.270995
987	0.310075	1.5708	0.785398	0.30513	0.889145	0.271305
988	0.310389	1.5708	0.785398	0.305429	0.889289	0.271615
989	0.310704	1.5708	0.785398	0.305729	0.889432	0.271925
990	0.311018	1.5708	0.785398	0.306028	0.889576	0.272235
991	0.311332	1.5708	0.785398	0.306327	0.889719	0.272545
992	0.311646	1.5708	0.785398	0.306626	0.889863	0.272855
993	0.31196	1.5708	0.785398	0.306925	0.890006	0.273165
994	0.312274	1.5708	0.785398	0.307224	0.890149	0.273475
995	0.312588	1.5708	0.785398	0.307523	0.890292	0.273785
996	0.312903	1.5708	0.785398	0.307822	0.890435	0.274095
997	0.313217	1.5708	0.785398	0.308121	0.890578	0.274405
998	0.313531	1.5708	0.785398	0.308419	0.890721	0.274716
999	0.313845	1.5708	0.785398	0.308718	0.890864	0.275026
1000	0.314159	1.5708	0.785398	0.309017	0.891007	0.275336
1001	0.314473	1.5708	0.785398	0.309316	0.891149	0.275646
1002	0.314788	1.5708	0.785398	0.309614	0.891292	0.275957
1003	0.315102	1.5708	0.785398	0.309913	0.891434	0.276267
1004	0.315416	1.5708	0.785398	0.310212	0.891576	0.276578
1005	0.31573	1.5708	0.785398	0.310511	0.891719	0.276888
1006	0.316044	1.5708	0.785398	0.310809	0.891861	0.277198
1007	0.316358	1.5708	0.785398	0.311108	0.892003	0.277509
1008	0.316673	1.5708	0.785398	0.311406	0.892145	0.277819
1009	0.316987	1.5708	0.785398	0.311705	0.892287	0.27813
1010	0.317301	1.5708	0.785398	0.312003	0.892428	0.278441
1011	0.317615	1.5708	0.785398	0.312302	0.89257	0.278751
1012	0.317929	1.5708	0.785398	0.3126	0.892712	0.279062
1013	0.318243	1.5708	0.785398	0.312899	0.892853	0.279373
1014	0.318557	1.5708	0.785398	0.313197	0.892995	0.279683
1015	0.318872	1.5708	0.785398	0.313495	0.893136	0.279994
1016	0.319186	1.5708	0.785398	0.313794	0.893277	0.280305
1017	0.3195	1.5708	0.785398	0.314092	0.893418	0.280615
1018	0.319814	1.5708	0.785398	0.31439	0.89356	0.280926
1019	0.320128	1.5708	0.785398	0.314688	0.893701	0.281237
1020	0.320442	1.5708	0.785398	0.314987	0.893841	0.281548
1021	0.320757	1.5708	0.785398	0.315285	0.893982	0.281859
1022	0.321071	1.5708	0.785398	0.315583	0.894123	0.28217
1023	0.321385	1.5708	0.785398	0.315881	0.894264	0.282481
1024	0.321699	1.5708	0.785398	0.316179	0.894404	0.282792
1025	0.322013	1.5708	0.785398	0.316477	0.894545	0.283103
1026	0.322327	1.5708	0.785398	0.316775	0.894685	0.283414
1027	0.322642	1.5708	0.785398	0.317073	0.894825	0.283725
1028	0.322956	1.5708	0.785398	0.317371	0.894966	0.284036
1029	0.32327	1.5708	0.785398	0.317669	0.895106	0.284347
1030	0.323584	1.5708	0.785398	0.317967	0.895246	0.284658
1031	0.323898	1.5708	0.785398	0.318264	0.895386	0.284969
1032	0.324212	1.5708	0.785398	0.318562	0.895525	0.285281
1033	0.324527	1.5708	0.785398	0.31886	0.895665	0.285592
1034	0.324841	1.5708	0.785398	0.319158	0.895805	0.285903
1035	0.325155	1.5708	0.785398	0.319456	0.895944	0.286214
1036	0.325469	1.5708	0.785398	0.319753	0.896084	0.286526
1037	0.325783	1.5708	0.785398	0.320051	0.896223	0.286837
1038	0.326097	1.5708	0.785398	0.320348	0.896363	0.287148
1039	0.326411	1.5708	0.785398	0.320646	0.896502	0.28746
1040	0.326726	1.5708	0.785398	0.320944	0.896641	0.287771
1041	0.32704	1.5708	0.785398	0.321241	0.89678	0.288083
1042	0.327354	1.5708	0.785398	0.321539	0.896919	0.288394
1043	0.327668	1.5708	0.785398	0.321836	0.897058	0.288706
1044	0.327982	1.5708	0.785398	0.322134	0.897197	0.289017
1045	0.328296	1.5708	0.785398	0.322431	0.897335	0.289329
1046	0.328611	1.5708	0.785398	0.322728	0.897474	0.28964
1047	0.328925	1.5708	0.785398	0.323026	0.897613	0.289952
1048	0.329239	1.5708	0.785398	0.323323	0.897751	0.290263
1049	0.329553	1.5708	0.785398	0.32362	0.897889	0.290575
1050	0.329867	1.5708	0.785398	0.323917	0.898028	0.290887
1051	0.330181	1.5708	0.785398	0.324215	0.898166	0.291198
1052	0.330496	1.5708	0.785398	0.324512	0.898304	0.29151
1053	0.33081	1.5708	0.785398	0.324809	0.898442	0.291822
1054	0.331124	1.5708	0.785398	0.325106	0.89858	0.292134
1055	0.331438	1.5708	0.785398	0.325403	0.898718	0.292445
1056	0.331752	1.5708	0.785398	0.3257	0.898855	0.292757
1057	0.332066	1.5708	0.785398	0.325997	0.898993	0.293069
1058	0.332381	1.5708	0.785398	0.326294	0.89913	0.293381
1059	0.332695	1.5708	0.785398	0.326591	0.899268	0.293693
1060	0.333009	1.5708	0.785398	0.326888	0.899405	0.294005
1061	0.333323	1.5708	0.785398	0.327185	0.899543	0.294317
1062	0.333637	1.5708	0.785398	0.327482	0.89968	0.294629
1063	0.333951	1.5708	0.785398	0.327779	0.899817	0.294941
1064	0.334265	1.5708	0.785398	0.328075	0.899954	0.295253
1065	0.33458	1.5708	0.785398	0.328372	0.900091	0.295565
1066	0.334894	1.5708	0.785398	0.328669	0.900228	0.295877
1067	0.335208	1.5708	0.785398	0.328966	0.900364	0.296189
1068	0.335522	1.5708	0.785398	0.329262	0.900501	0.296501
1069	0.335836	1.5708	0.785398	0.329559	0.900638	0.296813
1070	0.33615	1.5708	0.785398	0.329855	0.900774	0.297125
1071	0.336465	1.5708	0.785398	0.330152	0.90091	0.297437
1072	0.336779	1.5708	0.785398	0.330449	0.901047	0.29775
1073	0.337093	1.5708	0.785398	0.330745	0.901183	0.298062
1074	0.337407	1.5708	0.785398	0.331041	0.901319	0.298374
1075	0.337721	1.5708	0.785398	0.331338	0.901455	0.298686
1076	0.338035	1.5708	0.785398	0.331634	0.901591	0.298999
1077	0.33835	1.5708	0.785398	0.331931	0.901727	0.299311
1078	0.338664	1.5708	0.785398	0.332227	0.901863	0.299623
1079	0.338978	1.5708	0.785398	0.332523	0.901998	0.299935
1080	0.339292	1.5708	0.785398	0.33282	0.902134	0.300248
1081	0.339606	1.5708	0.785398	0.333116	0.902269	0.30056
1082	0.33992	1.5708	0.785398	0.333412	0.902405	0.300873
1083	0.340234	1.5708	0.785398	0.333708	0.90254	0.301185
1084	0.340549	1.5708	0.785398	0.334004	0.902675	0.301497
1085	0.340863	1.5708	0.785398	0.3343	0.902811	0.30181
1086	0.341177	1.5708	0.785398	0.334596	0.902946	0.302122
1087	0.341491	1.5708	0.785398	0.334892	0.903081	0.302435
1088	0.341805	1.5708	0.785398	0.335188	0.903215	0.302747
1089	0.342119	1.5708	0.785398	0.335484	0.90335	0.30306
1090	0.342434	1.5708	0.785398	0.33578	0.903485	0.303373
1091	0.342748	1.5708	0.785398	0.336076	0.90362	0.303685
1092	0.343062	1.5708	0.785398	0.336372	0.903754	0.303998
1093	0.343376	1.5708	0.785398	0.336668	0.903889	0.30431
1094	0.34369	1.5708	0.785398	0.336964	0.904023	0.304623
1095	0.344004	1.5708	0.785398	0.33726	0.904157	0.304936
1096	0.344319	1.5708	0.785398	0.337555	0.904291	0.305248
1097	0.344633	1.5708	0.785398	0.337851	0.904425	0.305561
1098	0.344947	1.5708	0.785398	0.338147	0.904559	0.305874
1099	0.345261	1.5708	0.785398	0.338442	0.904693	0.306186
1100	0.345575	1.5708	0.785398	0.338738	0.904827	0.306499
1101	0.345889	1.5708	0.785398	0.339033	0.904961	0.306812
1102	0.346204	1.5708	0.785398	0.339329	0.905094	0.307125
1103	0.346518	1.5708	0.785398	0.339625	0.905228	0.307438
1104	0.346832	1.5708	0.785398	0.33992	0.905361	0.30775
1105	0.347146	1.5708	0.785398	0.340215	0.905495	0.308063
1106	0.34746	1.5708	0.785398	0.340511	0.905628	0.308376
1107	0.347774	1.5708	0.785398	0.340806	0.905761	0.308689
1108	0.348088	1.5708	0.785398	0.341102	0.905894	0.309002
1109	0.348403	1.5708	0.785398	0.341397	0.906027	0.309315
1110	0.348717	1.5708	0.785398	0.341692	0.90616	0.309628
1111	0.349031	1.5708	0.785398	0.341987	0.906293	0.309941
1112	0.349345	1.5708	0.785398	0.342283	0.906426	0.310254
1113	0.349659	1.5708	0.785398	0.342578	0.906558	0.310567
1114	0.349973	1.5708	0.785398	0.342873	0.906691	0.31088
1115	0.350288	1.5708	0.785398	0.343168	0.906823	0.311193
1116	0.350602	1.5708	0.785398	0.343463	0.906956	0.311506
1117	0.350916	1.5708	0.785398	0.343758	0.907088	0.311819
1118	0.35123	1.5708	0.785398	0.344053	0.90722	0.312132
1119	0.351544	1.5708	0.785398	0.344348	0.907352	0.312445
1120	0.351858	1.5708	0.785398	0.344643	0.907484	0.312758
1121	0.352173	1.5708	0.785398	0.344938	0.907616	0.313071
1122	0.352487	1.5708	0.785398	0.345233	0.907748	0.313384
1123	0.352801	1.5708	0.785398	0.345528	0.90788	0.313697
1124	0.353115	1.5708	0.785398	0.345822	0.908012	0.314011
1125	0.353429	1.5708	0.785398	0.346117	0.908143	0.314324
1126	0.353743	1.5708	0.785398	0.346412	0.908275	0.314637
1127	0.354057	1.5708	0.785398	0.346706	0.908406	0.31495
1128	0.354372	1.5708	0.785398	0.347001	0.908537	0.315263
1129	0.354686	1.5708	0.785398	0.347296	0.908669	0.315577
1130	0.355	1.5708	0.785398	0.34759	0.9088	0.31589
1131	0.355314	1.5708	0.785398	0.347885	0.908931	0.316203
1132	0.355628	1.5708	0.785398	0.348179	0.909062	0.316517
1133	0.355942	1.5708	0.785398	0.348474	0.909193	0.31683
1134	0.356257	1.5708	0.785398	0.348768	0.909323	0.317143
1135	0.356571	1.5708	0.785398	0.349063	0.909454	0.317457
1136	0.356885	1.5708	0.785398	0.349357	0.909585	0.31777
1137	0.357199	1.5708	0.785398	0.349651	0.909715	0.318083
1138	0.357513	1.5708	0.785398	0.349946	0.909845	0.318397
1139	0.357827	1.5708	0.785398	0.35024	0.909976	0.31871
1140	0.358142	1.5708	0.785398	0.350534	0.910106	0.319023
1141	0.358456	1.5708	0.785398	0.350829	0.910236	0.319337
1142	0.35877	1.5708	0.785398	0.351123	0.910366	0.31965
1143	0.359084	1.5708	0.785398	0.351417	0.910496	0.319964
1144	0.359398	1.5708	0.785398	0.351711	0.910626	0.320277
1145	0.359712	1.5708	0.785398	0.352005	0.910756	0.320591
1146	0.360027	1.5708	0.785398	0.352299	0.910885	0.320904
1147	0.360341	1.5708	0.785398	0.352593	0.911015	0.321218
1148	0.360655	1.5708	0.785398	0.352887	0.911145	0.321531
1149	0.360969	1.5708	0.785398	0.353181	0.911274	0.321845
1150	0.361283	1.5708	0.785398	0.353475	0.911403	0.322158
1151	0.361597	1.5708	0.785398	0.353769	0.911533	0.322472
1152	0.361911	1.5708	0.785398	0.354063	0.911662	0.322785
1153	0.362226	1.5708	0.785398	0.354356	0.911791	0.323099
1154	0.36254	1.5708	0.785398	0.35465	0.91192	0.323412
1155	0.362854	1.5708	0.785398	0.354944	0.912049	0.323726
1156	0.363168	1.5708	0.785398	0.355237	0.912177	0.32404
1157	0.363482	1.5708	0.785398	0.355531	0.912306	0.324353
1158	0.363796	1.5708	0.785398	0.355825	0.912435	0.324667
1159	0.364111	1.5708	0.785398	0.356118	0.912563	0.32498
1160	0.364425	1.5708	0.785398	0.356412	0.912692	0.325294
1161	0.364739	1.5708	0.785398	0.356705	0.91282	0.325608
1162	0.365053	1.5708	0.785398	0.356999	0.912948	0.325921
1163	0.365367	1.5708	0.785398	0.357292	0.913076	0.326235
1164	0.365681	1.5708	0.785398	0.357586	0.913204	0.326549
1165	0.365996	1.5708	0.785398	0.357879	0.913332	0.326863
1166	0.36631	1.5708	0.785398	0.358172	0.91346	0.327176
1167	0.366624	1.5708	0.785398	0.358466	0.913588	0.32749
1168	0.366938	1.5708	0.785398	0.358759	0.913716	0.327804
1169	0.367252	1.5708	0.785398	0.359052	0.913843	0.328117
1170	0.367566	1.5708	0.785398	0.359345	0.913971	0.328431
1171	0.36788	1.5708	0.785398	0.359639	0.914098	0.328745
1172	0.368195	1.5708	0.785398	0.359932	0.914226	0.329059
1173	0.368509	1.5708	0.785398	0.360225	0.914353	0.329373
1174	0.368823	1.5708	0.785398	0.360518	0.91448	0.329686
1175	0.369137	1.5708	0.785398	0.360811	0.914607	0.33
1176	0.369451	1.5708	0.785398	0.361104	0.914734	0.330314
1177	0.369765	1.5708	0.785398	0.361397	0.914861	0.330628
1178	0.37008	1.5708	0.785398	0.36169	0.914988	0.330942
1179	0.370394	1.5708	0.785398	0.361983	0.915115	0.331255
1180	0.370708	1.5708	0.785398	0.362275	0.915241	0.331569
1181	0.371022	1.5708	0.785398	0.362568	0.915368	0.331883
1182	0.371336	1.5708	0.785398	0.362861	0.915494	0.332197
1183	0.37165	1.5708	0.785398	0.363154	0.91562	0.332511
1184	0.371965	1.5708	0.785398	0.363446	0.915747	0.332825
1185	0.372279	1.5708	0.785398	0.363739	0.915873	0.333139
1186	0.372593	1.5708	0.785398	0.364032	0.915999	0.333453
1187	0.372907	1.5708	0.785398	0.364324	0.916125	0.333767
1188	0.373221	1.5708	0.785398	0.364617	0.916251	0.33408
1189	0.373535	1.5708	0.785398	0.364909	0.916377	0.334394
1190	0.37385	1.5708	0.785398	0.365202	0.916502	0.334708
1191	0.374164	1.5708	0.785398	0.365494	0.916628	0.335022
1192	0.374478	1.5708	0.785398	0.365787	0.916754	0.335336
1193	0.374792	1.5708	0.785398	0.366079	0.916879	0.33565
1194	0.375106	1.5708	0.785398	0.366371	0.917004	0.335964
1195	0.37542	1.5708	0.785398	0.366664	0.91713	0.336278
1196	0.375734	1.5708	0.785398	0.366956	0.917255	0.336592
1197	0.376049	1.5708	0.785398	0.367248	0.91738	0.336906
1198	0.376363	1.5708	0.785398	0.36754	0.917505	0.33722
1199	0.376677	1.5708	0.785398	0.367832	0.91763	0.337534
1200	0.376991	1.5708	0.785398	0.368125	0.917755	0.337848
1201	0.377305	1.5708	0.785398	0.368417	0.917879	0.338162
1202	0.377619	1.5708	0.785398	0.368709	0.918004	0.338476
1203	0.377934	1.5708	0.785398	0.369001	0.918129	0.33879
1204	0.378248	1.5708	0.785398	0.369293	0.918253	0.339104
1205	0.378562	1.5708	0.785398	0.369585	0.918377	0.339418
1206	0.378876	1.5708	0.785398	0.369876	0.918502	0.339732
1207	0.37919	1.5708	0.785398	0.370168	0.918626	0.340046
1208	0.379504	1.5708	0.785398	0.37046	0.91875	0.34036
1209	0.379819	1.5708	0.785398	0.370752	0.918874	0.340674
1210	0.380133	1.5708	0.785398	0.371044	0.918998	0.340988
1211	0.380447	1.5708	0.785398	0.371335	0.919122	0.341302
1212	0.380761	1.5708	0.785398	0.371627	0.919245	0.341616
1213	0.381075	1.5708	0.785398	0.371919	0.919369	0.341931
1214	0.381389	1.5708	0.785398	0.37221	0.919492	0.342245
1215	0.381704	1.5708	0.785398	0.372502	0.919616	0.342559
1216	0.382018	1.5708	0.785398	0.372793	0.919739	0.342873
1217	0.382332	1.5708	0.785398	0.373085	0.919863	0.343187
1218	0.382646	1.5708	0.785398	0.373376	0.919986	0.343501
1219	0.38296	1.5708	0.785398	0.373668	0.920109	0.343815
1220	0.383274	1.5708	0.785398	0.373959	0.920232	0.344129
1221	0.383588	1.5708	0.785398	0.374251	0.920355	0.344443
1222	0.383903	1.5708	0.785398	0.374542	0.920478	0.344757
1223	0.384217	1.5708	0.785398	0.374833	0.9206	0.345071
1224	0.384531	1.5708	0.785398	0.375124	0.920723	0.345386
1225	0.384845	1.5708	0.785398	0.375416	0.920845	0.3457
1226	0.385159	1.5708	0.785398	0.375707	0.920968	0.346014
1227	0.385473	1.5708	0.785398	0.375998	0.92109	0.346328
1228	0.385788	1.5708	0.785398	0.376289	0.921213	0.346642
1229	0.386102	1.5708	0.785398	0.37658	0.921335	0.346956
1230	0.386416	1.5708	0.785398	0.376871	0.921457	0.34727
1231	0.38673	1.5708	0.785398	0.377162	0.921579	0.347585
1232	0.387044	1.5708	0.785398	0.377453	0.921701	0.347899
1233	0.387358	1.5708	0.785398	0.377744	0.921823	0.348213
1234	0.387673	1.5708	0.785398	0.378035	0.921944	0.348527
1235	0.387987	1.5708	0.785398	0.378326	0.922066	0.348841
1236	0.388301	1.5708	0.785398	0.378616	0.922187	0.349155
1237	0.388615	1.5708	0.785398	0.378907	0.922309	0.349469
1238	0.388929	1.5708	0.785398	0.379198	0.92243	0.349784
1239	0.389243	1.5708	0.785398	0.379488	0.922552	0.350098
1240	0.389557	1.5708	0.785398	0.379779	0.922673	0.350412
1241	0.389872	1.5708	0.785398	0.38007	0.922794	0.350726
1242	0.390186	1.5708	0.785398	0.38036	0.922915	0.35104
1243	0.3905	1.5708	0.785398	0.380651	0.923036	0.351354
1244	0.390814	1.5708	0.785398	0.380941	0.923157	0.351668
1245	0.391128	1.5708	0.785398	0.381232	0.923277	0.351983
1246	0.391442	1.5708	0.785398	0.381522	0.923398	0.352297
1247	0.391757	1.5708	0.785398	0.381813	0.923518	0.352611
1248	0.392071	1.5708	0.785398	0.382103	0.923639	0.352925
1249	0.392385	1.5708	0.785398	0.382393	0.923759	0.353239
1250	0.392699	1.5708	0.785398	0.382683	0.92388	0.353553
1251	0.393013	1.5708	0.785398	0.382974	0.924	0.353868
1252	0.393327	1.5708	0.785398	0.383264	0.92412	0.354182
1253	0.393642	1.5708	0.785398	0.383554	0.92424	0.354496
1254	0.393956	1.5708	0.785398	0.383844	0.92436	0.35481
1255	0.39427	1.5708	0.785398	0.384134	0.92448	0.355124
1256	0.394584	1.5708	0.785398	0.384424	0.924599	0.355438
1257	0.394898	1.5708	0.785398	0.384714	0.924719	0.355752
1258	0.395212	1.5708	0.785398	0.385004	0.924838	0.356067
1259	0.395527	1.5708	0.785398	0.385294	0.924958	0.356381
1260	0.395841	1.5708	0.785398	0.385584	0.925077	0.356695
1261	0.396155	1.5708	0.785398	0.385874	0.925196	0.357009
1262	0.396469	1.5708	0.785398	0.386164	0.925316	0.357323
1263	0.396783	1.5708	0.785398	0.386453	0.925435	0.357637
1264	0.397097	1.5708	0.785398	0.386743	0.925554	0.357952
1265	0.397411	1.5708	0.785398	0.387033	0.925673	0.358266
1266	0.397726	1.5708	0.785398	0.387323	0.925791	0.35858
1267	0.39804	1.5708	0.785398	0.387612	0.92591	0.358894
1268	0.398354	1.5708	0.785398	0.387902	0.926029	0.359208
1269	0.398668	1.5708	0.785398	0.388191	0.926147	0.359522
1270	0.398982	1.5708	0.785398	0.388481	0.926266	0.359836
1271	0.399296	1.5708	0.785398	0.38877	0.926384	0.360151
1272	0.399611	1.5708	0.785398	0.38906	0.926502	0.360465
1273	0.399925	1.5708	0.785398	0.389349	0.926621	0.360779
1274	0.400239	1.5708	0.785398	0.389638	0.926739	0.361093
1275	0.400553	1.5708	0.785398	0.389928	0.926857	0.361407
1276	0.400867	1.5708	0.785398	0.390217	0.926974	0.361721
1277	0.401181	1.5708	0.785398	0.390506	0.927092	0.362035
1278	0.401496	1.5708	0.785398	0.390795	0.92721	0.362349
1279	0.40181	1.5708	0.785398	0.391085	0.927328	0.362664
1280	0.402124	1.5708	0.785398	0.391374	0.927445	0.362978
1281	0.402438	1.5708	0.785398	0.391663	0.927563	0.363292
1282	0.402752	1.5708	0.785398	0.391952	0.92768	0.363606
1283	0.403066	1.5708	0.785398	0.392241	0.927797	0.36392
1284	0.40338	1.5708	0.785398	0.39253	0.927914	0.364234
1285	0.403695	1.5708	0.785398	0.392819	0.928031	0.364548
1286	0.404009	1.5708	0.785398	0.393108	0.928148	0.364862
1287	0.404323	1.5708	0.785398	0.393396	0.928265	0.365176
1288	0.404637	1.5708	0.785398	0.393685	0.928382	0.36549
1289	0.404951	1.5708	0.785398	0.393974	0.928499	0.365804
1290	0.405265	1.5708	0.785398	0.394263	0.928615	0.366118
1291	0.40558	1.5708	0.785398	0.394551	0.928732	0.366432
1292	0.405894	1.5708	0.785398	0.39484	0.928848	0.366747
1293	0.406208	1.5708	0.785398	0.395129	0.928965	0.367061
1294	0.406522	1.5708	0.785398	0.395417	0.929081	0.367375
1295	0.406836	1.5708	0.785398	0.395706	0.929197	0.367689
1296	0.40715	1.5708	0.785398	0.395994	0.929313	0.368003
1297	0.407465	1.5708	0.785398	0.396283	0.929429	0.368317
1298	0.407779	1.5708	0.785398	0.396571	0.929545	0.368631
1299	0.408093	1.5708	0.785398	0.39686	0.929661	0.368945
1300	0.408407	1.5708	0.785398	0.397148	0.929776	0.369259
1301	0.408721	1.5708	0.785398	0.397436	0.929892	0.369573
1302	0.409035	1.5708	0.785398	0.397724	0.930008	0.369887
1303	0.40935	1.5708	0.785398	0.398013	0.930123	0.370201
1304	0.409664	1.5708	0.785398	0.398301	0.930238	0.370515
1305	0.409978	1.5708	0.785398	0.398589	0.930354	0.370829
1306	0.410292	1.5708	0.785398	0.398877	0.930469	0.371143
1307	0.410606	1.5708	0.785398	0.399165	0.930584	0.371457
1308	0.41092	1.5708	0.785398	0.399453	0.930699	0.371771
1309	0.411234	1.5708	0.785398	0.399741	0.930814	0.372085
1310	0.411549	1.5708	0.785398	0.400029	0.930928	0.372398
1311	0.411863	1.5708	0.785398	0.400317	0.931043	0.372712
1312	0.412177	1.5708	0.785398	0.400605	0.931158	0.373026
1313	0.412491	1.5708	0.785398	0.400893	0.931272	0.37334
1314	0.412805	1.5708	0.785398	0.401181	0.931387	0.373654
1315	0.413119	1.5708	0.785398	0.401468	0.931501	0.373968
1316	0.413434	1.5708	0.785398	0.401756	0.931615	0.374282
1317	0.413748	1.5708	0.785398	0.402044	0.931729	0.374596
1318	0.414062	1.5708	0.785398	0.402331	0.931843	0.37491
1319	0.414376	1.5708	0.785398	0.402619	0.931957	0.375224
1320	0.41469	1.5708	0.785398	0.402906	0.932071	0.375537
1321	0.415004	1.5708	0.785398	0.403194	0.932185	0.375851
1322	0.415319	1.5708	0.785398	0.403481	0.932299	0.376165
1323	0.415633	1.5708	0.785398	0.403769	0.932412	0.376479
1324	0.415947	1.5708	0.785398	0.404056	0.932526	0.376793
1325	0.416261	1.5708	0.785398	0.404344	0.932639	0.377107
1326	0.416575	1.5708	0.785398	0.404631	0.932752	0.37742
1327	0.416889	1.5708	0.785398	0.404918	0.932866	0.377734
1328	0.417204	1.5708	0.785398	0.405205	0.932979	0.378048
1329	0.417518	1.5708	0.785398	0.405493	0.933092	0.378362
1330	0.417832	1.5708	0.785398	0.40578	0.933205	0.378676
1331	0.418146	1.5708	0.785398	0.406067	0.933317	0.378989
1332	0.41846	1.5708	0.785398	0.406354	0.93343	0.379303
1333	0.418774	1.5708	0.785398	0.406641	0.933543	0.379617
1334	0.419088	1.5708	0.785398	0.406928	0.933655	0.379931
1335	0.419403	1.5708	0.785398	0.407215	0.933768	0.380244
1336	0.419717	1.5708	0.785398	0.407502	0.93388	0.380558
1337	0.420031	1.5708	0.785398	0.407789	0.933993	0.380872
1338	0.420345	1.5708	0.785398	0.408076	0.934105	0.381185
1339	0.420659	1.5708	0.785398	0.408362	0.934217	0.381499
1340	0.420973	1.5708	0.785398	0.408649	0.934329	0.381813
1341	0.421288	1.5708	0.785398	0.408936	0.934441	0.382126
1342	0.421602	1.5708	0.785398	0.409222	0.934553	0.38244
1343	0.421916	1.5708	0.785398	0.409509	0.934664	0.382754
1344	0.42223	1.5708	0.785398	0.409796	0.934776	0.383067
1345	0.422544	1.5708	0.785398	0.410082	0.934888	0.383381
1346	0.422858	1.5708	0.785398	0.410369	0.934999	0.383694
1347	0.423173	1.5708	0.785398	0.410655	0.93511	0.384008
1348	0.423487	1.5708	0.785398	0.410942	0.935222	0.384322
1349	0.423801	1.5708	0.785398	0.411228	0.935333	0.384635
1350	0.424115	1.5708	0.785398	0.411514	0.935444	0.384949
1351	0.424429	1.5708	0.785398	0.411801	0.935555	0.385262
1352	0.424743	1.5708	0.785398	0.412087	0.935666	0.385576
1353	0.425057	1.5708	0.785398	0.412373	0.935777	0.385889
1354	0.425372	1.5708	0.785398	0.412659	0.935887	0.386203
1355	0.425686	1.5708	0.785398	0.412945	0.935998	0.386516
1356	0.426	1.5708	0.785398	0.413232	0.936109	0.38683
1357	0.426314	1.5708	0.785398	0.413518	0.936219	0.387143
1358	0.426628	1.5708	0.785398	0.413804	0.936329	0.387457
1359	0.426942	1.5708	0.785398	0.41409	0.93644	0.38777
1360	0.427257	1.5708	0.785398	0.414376	0.93655	0.388083
1361	0.427571	1.5708	0.785398	0.414661	0.93666	0.388397
1362	0.427885	1.5708	0.785398	0.414947	0.93677	0.38871
1363	0.428199	1.5708	0.785398	0.415233	0.93688	0.389024
1364	0.428513	1.5708	0.785398	0.415519	0.93699	0.389337
1365	0.428827	1.5708	0.785398	0.415805	0.937099	0.38965
1366	0.429142	1.5708	0.785398	0.41609	0.937209	0.389964
1367	0.429456	1.5708	0.785398	0.416376	0.937318	0.390277
1368	0.42977	1.5708	0.785398	0.416662	0.937428	0.39059
1369	0.430084	1.5708	0.785398	0.416947	0.937537	0.390904
1370	0.430398	1.5708	0.785398	0.417233	0.937646	0.391217
1371	0.430712	1.5708	0.785398	0.417518	0.937756	0.39153
1372	0.431027	1.5708	0.785398	0.417804	0.937865	0.391843
1373	0.431341	1.5708	0.785398	0.418089	0.937974	0.392157
1374	0.431655	1.5708	0.785398	0.418374	0.938083	0.39247
1375	0.431969	1.5708	0.785398	0.41866	0.938191	0.392783
1376	0.432283	1.5708	0.785398	0.418945	0.9383	0.393096
1377	0.432597	1.5708	0.785398	0.41923	0.938409	0.393409
1378	0.432911	1.5708	0.785398	0.419515	0.938517	0.393722
1379	0.433226	1.5708	0.785398	0.419801	0.938626	0.394036
1380	0.43354	1.5708	0.785398	0.420086	0.938734	0.394349
1381	0.433854	1.5708	0.785398	0.420371	0.938842	0.394662
1382	0.434168	1.5708	0.785398	0.420656	0.93895	0.394975
1383	0.434482	1.5708	0.785398	0.420941	0.939058	0.395288
1384	0.434796	1.5708	0.785398	0.421226	0.939166	0.395601
1385	0.435111	1.5708	0.785398	0.421511	0.939274	0.395914
1386	0.435425	1.5708	0.785398	0.421796	0.939382	0.396227
1387	0.435739	1.5708	0.785398	0.42208	0.939489	0.39654
1388	0.436053	1.5708	0.785398	0.422365	0.939597	0.396853
1389	0.436367	1.5708	0.785398	0.42265	0.939705	0.397166
1390	0.436681	1.5708	0.785398	0.422935	0.939812	0.397479
1391	0.436996	1.5708	0.785398	0.423219	0.939919	0.397792
1392	0.43731	1.5708	0.785398	0.423504	0.940026	0.398105
1393	0.437624	1.5708	0.785398	0.423788	0.940134	0.398418
1394	0.437938	1.5708	0.785398	0.424073	0.940241	0.398731
1395	0.438252	1.5708	0.785398	0.424357	0.940348	0.399043
1396	0.438566	1.5708	0.785398	0.424642	0.940454	0.399356
1397	0.43888	1.5708	0.785398	0.424926	0.940561	0.399669
1398	0.439195	1.5708	0.785398	0.425211	0.940668	0.399982
1399	0.439509	1.5708	0.785398	0.425495	0.940774	0.400295
1400	0.439823	1.5708	0.785398	0.425779	0.940881	0.400608
1401	0.440137	1.5708	0.785398	0.426064	0.940987	0.40092
1402	0.440451	1.5708	0.785398	0.426348	0.941093	0.401233
1403	0.440765	1.5708	0.785398	0.426632	0.9412	0.401546
1404	0.44108	1.5708	0.785398	0.426916	0.941306	0.401858
1405	0.441394	1.5708	0.785398	0.4272	0.941412	0.402171
1406	0.441708	1.5708	0.785398	0.427484	0.941518	0.402484
1407	0.442022	1.5708	0.785398	0.427768	0.941623	0.402796
1408	0.442336	1.5708	0.785398	0.428052	0.941729	0.403109
1409	0.44265	1.5708	0.785398	0.428336	0.941835	0.403422
1410	0.442965	1.5708	0.785398	0.42862	0.94194	0.403734
1411	0.443279	1.5708	0.785398	0.428904	0.942046	0.404047
1412	0.443593	1.5708	0.785398	0.429187	0.942151	0.404359
1413	0.443907	1.5708	0.785398	0.429471	0.942256	0.404672
1414	0.444221	1.5708	0.785398	0.429755	0.942362	0.404984
1415	0.444535	1.5708	0.785398	0.430038	0.942467	0.405297
1416	0.44485	1.5708	0.785398	0.430322	0.942572	0.405609
1417	0.445164	1.5708	0.785398	0.430606	0.942676	0.405922
1418	0.445478	1.5708	0.785398	0.430889	0.942781	0.406234
1419	0.445792	1.5708	0.785398	0.431173	0.942886	0.406547
1420	0.446106	1.5708	0.785398	0.431456	0.942991	0.406859
1421	0.44642	1.5708	0.785398	0.431739	0.943095	0.407171
1422	0.446734	1.5708	0.785398	0.432023	0.943199	0.407484
1423	0.447049	1.5708	0.785398	0.432306	0.943304	0.407796
1424	0.447363	1.5708	0.785398	0.432589	0.943408	0.408108
1425	0.447677	1.5708	0.785398	0.432873	0.943512	0.408421
1426	0.447991	1.5708	0.785398	0.433156	0.943616	0.408733
1427	0.448305	1.5708	0.785398	0.433439	0.94372	0.409045
1428	0.448619	1.5708	0.785398	0.433722	0.943824	0.409357
1429	0.448934	1.5708	0.785398	0.434005	0.943928	0.409669
1430	0.449248	1.5708	0.785398	0.434288	0.944031	0.409982
1431	0.449562	1.5708	0.785398	0.434571	0.944135	0.410294
1432	0.449876	1.5708	0.785398	0.434854	0.944239	0.410606
1433	0.45019	1.5708	0.785398	0.435137	0.944342	0.410918
1434	0.450504	1.5708	0.785398	0.43542	0.944445	0.41123
1435	0.450819	1.5708	0.785398	0.435702	0.944548	0.411542
1436	0.451133	1.5708	0.785398	0.435985	0.944652	0.411854
1437	0.451447	1.5708	0.785398	0.436268	0.944755	0.412166
1438	0.451761	1.5708	0.785398	0.436551	0.944857	0.412478
1439	0.452075	1.5708	0.785398	0.436833	0.94496	0.41279
1440	0.452389	1.5708	0.785398	0.437116	0.945063	0.413102
1441	0.452704	1.5708	0.785398	0.437398	0.945166	0.413414
1442	0.453018	1.5708	0.785398	0.437681	0.945268	0.413726
1443	0.453332	1.5708	0.785398	0.437963	0.945371	0.414038
1444	0.453646	1.5708	0.785398	0.438246	0.945473	0.414349
1445	0.45396	1.5708	0.785398	0.438528	0.945575	0.414661
1446	0.454274	1.5708	0.785398	0.43881	0.945678	0.414973
1447	0.454588	1.5708	0.785398	0.439093	0.94578	0.415285
1448	0.454903	1.5708	0.785398	0.439375	0.945882	0.415597
1449	0.455217	1.5708	0.785398	0.439657	0.945984	0.415908
1450	0.455531	1.5708	0.785398	0.439939	0.946085	0.41622
1451	0.455845	1.5708	0.785398	0.440221	0.946187	0.416532
1452	0.456159	1.5708	0.785398	0.440503	0.946289	0.416843
1453	0.456473	1.5708	0.785398	0.440785	0.94639	0.417155
1454	0.456788	1.5708	0.785398	0.441067	0.946492	0.417467
1455	0.457102	1.5708	0.785398	0.441349	0.946593	0.417778
1456	0.457416	1.5708	0.785398	0.441631	0.946694	0.41809
1457	0.45773	1.5708	0.785398	0.441913	0.946795	0.418401
1458	0.458044	1.5708	0.785398	0.442195	0.946896	0.418713
1459	0.458358	1.5708	0.785398	0.442477	0.946997	0.419024
1460	0.458673	1.5708	0.785398	0.442758	0.947098	0.419336
1461	0.458987	1.5708	0.785398	0.44304	0.947199	0.419647
1462	0.459301	1.5708	0.785398	0.443322	0.9473	0.419958
1463	0.459615	1.5708	0.785398	0.443603	0.9474	0.42027
1464	0.459929	1.5708	0.785398	0.443885	0.947501	0.420581
1465	0.460243	1.5708	0.785398	0.444166	0.947601	0.420892
1466	0.460557	1.5708	0.785398	0.444448	0.947702	0.421204
1467	0.460872	1.5708	0.785398	0.444729	0.947802	0.421515
1468	0.461186	1.5708	0.785398	0.44501	0.947902	0.421826
1469	0.4615	1.5708	0.785398	0.445292	0.948002	0.422137
1470	0.461814	1.5708	0.785398	0.445573	0.948102	0.422449
1471	0.462128	1.5708	0.785398	0.445854	0.948202	0.42276
1472	0.462442	1.5708	0.785398	0.446135	0.948302	0.423071
1473	0.462757	1.5708	0.785398	0.446416	0.948401	0.423382
1474	0.463071	1.5708	0.785398	0.446698	0.948501	0.423693
1475	0.463385	1.5708	0.785398	0.446979	0.9486	0.424004
1476	0.463699	1.5708	0.785398	0.44726	0.9487	0.424315
1477	0.464013	1.5708	0.785398	0.447541	0.948799	0.424626
1478	0.464327	1.5708	0.785398	0.447822	0.948898	0.424937
1479	0.464642	1.5708	0.785398	0.448102	0.948997	0.425248
1480	0.464956	1.5708	0.785398	0.448383	0.949096	0.425559
1481	0.46527	1.5708	0.785398	0.448664	0.949195	0.42587
1482	0.465584	1.5708	0.785398	0.448945	0.949294	0.42618
1483	0.465898	1.5708	0.785398	0.449225	0.949393	0.426491
1484	0.466212	1.5708	0.785398	0.449506	0.949491	0.426802
1485	0.466527	1.5708	0.785398	0.449787	0.94959	0.427113
1486	0.466841	1.5708	0.785398	0.450067	0.949688	0.427424
1487	0.467155	1.5708	0.785398	0.450348	0.949787	0.427734
1488	0.467469	1.5708	0.785398	0.450628	0.949885	0.428045
1489	0.467783	1.5708	0.785398	0.450909	0.949983	0.428356
1490	0.468097	1.5708	0.785398	0.451189	0.950081	0.428666
1491	0.468411	1.5708	0.785398	0.451469	0.950179	0.428977
1492	0.468726	1.5708	0.785398	0.45175	0.950277	0.429287
1493	0.46904	1.5708	0.785398	0.45203	0.950375	0.429598
1494	0.469354	1.5708	0.785398	0.45231	0.950472	0.429908
1495	0.469668	1.5708	0.785398	0.45259	0.95057	0.430219
1496	0.469982	1.5708	0.785398	0.45287	0.950667	0.430529
1497	0.470296	1.5708	0.785398	0.453151	0.950765	0.43084
1498	0.470611	1.5708	0.785398	0.453431	0.950862	0.43115
1499	0.470925	1.5708	0.785398	0.453711	0.950959	0.43146
1500	0.471239	1.5708	0.785398	0.45399	0.951057	0.431771
1501	0.471553	1.5708	0.785398	0.45427	0.951154	0.432081
1502	0.471867	1.5708	0.785398	0.45455	0.95125	0.432391
1503	0.472181	1.5708	0.785398	0.45483	0.951347	0.432701
1504	0.472496	1.5708	0.785398	0.45511	0.951444	0.433012
1505	0.47281	1.5708	0.785398	0.45539	0.951541	0.433322
1506	0.473124	1.5708	0.785398	0.455669	0.951637	0.433632
1507	0.473438	1.5708	0.785398	0.455949	0.951734	0.433942
1508	0.473752	1.5708	0.785398	0.456228	0.95183	0.434252
1509	0.474066	1.5708	0.785398	0.456508	0.951926	0.434562
1510	0.47438	1.5708	0.785398	0.456787	0.952023	0.434872
1511	0.474695	1.5708	0.785398	0.457067	0.952119	0.435182
1512	0.475009	1.5708	0.785398	0.457346	0.952215	0.435492
1513	0.475323	1.5708	0.785398	0.457626	0.952311	0.435802
1514	0.475637	1.5708	0.785398	0.457905	0.952406	0.436112
1515	0.475951	1.5708	0.785398	0.458184	0.952502	0.436421
1516	0.476265	1.5708	0.785398	0.458463	0.952598	0.436731
1517	0.47658	1.5708	0.785398	0.458743	0.952693	0.437041
1518	0.476894	1.5708	0.785398	0.459022	0.952789	0.437351
1519	0.477208	1.5708	0.785398	0.459301	0.952884	0.43766
1520	0.477522	1.5708	0.785398	0.45958	0.952979	0.43797
1521	0.477836	1.5708	0.785398	0.459859	0.953074	0.43828
1522	0.47815	1.5708	0.785398	0.460138	0.95317	0.438589
1523	0.478465	1.5708	0.785398	0.460417	0.953265	0.438899
1524	0.478779	1.5708	0.785398	0.460696	0.953359	0.439208
1525	0.479093	1.5708	0.785398	0.460974	0.953454	0.439518
1526	0.479407	1.5708	0.785398	0.461253	0.953549	0.439827
1527	0.479721	1.5708	0.785398	0.461532	0.953643	0.440137
1528	0.480035	1.5708	0.785398	0.461811	0.953738	0.440446
1529	0.48035	1.5708	0.785398	0.462089	0.953832	0.440756
1530	0.480664	1.5708	0.785398	0.462368	0.953927	0.441065
1531	0.480978	1.5708	0.785398	0.462646	0.954021	0.441374
1532	0.481292	1.5708	0.785398	0.462925	0.954115	0.441683
1533	0.481606	1.5708	0.785398	0.463203	0.954209	0.441993
1534	0.48192	1.5708	0.785398	0.463482	0.954303	0.442302
1535	0.482234	1.5708	0.785398	0.46376	0.954397	0.442611
1536	0.482549	1.5708	0.785398	0.464038	0.954491	0.44292
1537	0.482863	1.5708	0.785398	0.464317	0.954584	0.443229
1538	0.483177	1.5708	0.785398	0.464595	0.954678	0.443538
1539	0.483491	1.5708	0.785398	0.464873	0.954771	0.443847
1540	0.483805	1.5708	0.785398	0.465151	0.954865	0.444156
1541	0.484119	1.5708	0.785398	0.465429	0.954958	0.444465
1542	0.484434	1.5708	0.785398	0.465707	0.955051	0.444774
1543	0.484748	1.5708	0.785398	0.465985	0.955144	0.445083
1544	0.485062	1.5708	0.785398	0.466263	0.955237	0.445392
1545	0.485376	1.5708	0.785398	0.466541	0.95533	0.445701
1546	0.48569	1.5708	0.785398	0.466819	0.955423	0.446009
1547	0.486004	1.5708	0.785398	0.467097	0.955515	0.446318
1548	0.486319	1.5708	0.785398	0.467374	0.955608	0.446627
1549	0.486633	1.5708	0.785398	0.467652	0.955701	0.446935
1550	0.486947	1.5708	0.785398	0.46793	0.955793	0.447244
1551	0.487261	1.5708	0.785398	0.468207	0.955885	0.447553
1552	0.487575	1.5708	0.785398	0.468485	0.955978	0.447861
1553	0.487889	1.5708	0.785398	0.468763	0.95607	0.44817
1554	0.488203	1.5708	0.785398	0.46904	0.956162	0.448478
1555	0.488518	1.5708	0.785398	0.469317	0.956254	0.448787
1556	0.488832	1.5708	0.785398	0.469595	0.956346	0.449095
1557	0.489146	1.5708	0.785398	0.469872	0.956437	0.449403
1558	0.48946	1.5708	0.785398	0.470149	0.956529	0.449712
1559	0.489774	1.5708	0.785398	0.470427	0.956621	0.45002
1560	0.490088	1.5708	0.785398	0.470704	0.956712	0.450328
1561	0.490403	1.5708	0.785398	0.470981	0.956803	0.450636
1562	0.490717	1.5708	0.785398	0.471258	0.956895	0.450944
1563	0.491031	1.5708	0.785398	0.471535	0.956986	0.451253
1564	0.491345	1.5708	0.785398	0.471812	0.957077	0.451561
1565	0.491659	1.5708	0.785398	0.472089	0.957168	0.451869
1566	0.491973	1.5708	0.785398	0.472366	0.957259	0.452177
1567	0.492288	1.5708	0.785398	0.472643	0.95735	0.452485
1568	0.492602	1.5708	0.785398	0.47292	0.95744	0.452793
1569	0.492916	1.5708	0.785398	0.473197	0.957531	0.453101
1570	0.49323	1.5708	0.785398	0.473473	0.957622	0.453408
1571	0.493544	1.5708	0.785398	0.47375	0.957712	0.453716
1572	0.493858	1.5708	0.785398	0.474027	0.957802	0.454024
1573	0.494173	1.5708	0.785398	0.474303	0.957893	0.454332
1574	0.494487	1.5708	0.785398	0.47458	0.957983	0.454639
1575	0.494801	1.5708	0.785398	0.474856	0.958073	0.454947
1576	0.495115	1.5708	0.785398	0.475133	0.958163	0.455255
1577	0.495429	1.5708	0.785398	0.475409	0.958253	0.455562
1578	0.495743	1.5708	0.785398	0.475686	0.958343	0.45587
1579	0.496057	1.5708	0.785398	0.475962	0.958432	0.456177
1580	0.496372	1.5708	0.785398	0.476238	0.958522	0.456485
1581	0.496686	1.5708	0.785398	0.476514	0.958611	0.456792
1582	0.497	1.5708	0.785398	0.476791	0.958701	0.457099
1583	0.497314	1.5708	0.785398	0.477067	0.95879	0.457407
1584	0.497628	1.5708	0.785398	0.477343	0.958879	0.457714
1585	0.497942	1.5708	0.785398	0.477619	0.958968	0.458021
1586	0.498257	1.5708	0.785398	0.477895	0.959057	0.458329
1587	0.498571	1.5708	0.785398	0.478171	0.959146	0.458636
1588	0.498885	1.5708	0.785398	0.478447	0.959235	0.458943
1589	0.499199	1.5708	0.785398	0.478723	0.959324	0.45925
1590	0.499513	1.5708	0.785398	0.478998	0.959412	0.459557
1591	0.499827	1.5708	0.785398	0.479274	0.959501	0.459864
1592	0.500142	1.5708	0.785398	0.47955	0.959589	0.460171
1593	0.500456	1.5708	0.785398	0.479825	0.959678	0.460478
1594	0.50077	1.5708	0.785398	0.480101	0.959766	0.460785
1595	0.501084	1.5708	0.785398	0.480377	0.959854	0.461092
1596	0.501398	1.5708	0.785398	0.480652	0.959942	0.461398
1597	0.501712	1.5708	0.785398	0.480928	0.96003	0.461705
1598	0.502027	1.5708	0.785398	0.481203	0.960118	0.462012
1599	0.502341	1.5708	0.785398	0.481478	0.960206	0.462318
1600	0.502655	1.5708	0.785398	0.481754	0.960294	0.462625
1601	0.502969	1.5708	0.785398	0.482029	0.960381	0.462932
1602	0.503283	1.5708	0.785398	0.482304	0.960469	0.463238
1603	0.503597	1.5708	0.785398	0.482579	0.960556	0.463545
1604	0.503911	1.5708	0.785398	0.482854	0.960644	0.463851
1605	0.504226	1.5708	0.785398	0.48313	0.960731	0.464157
1606	0.50454	1.5708	0.785398	0.483405	0.960818	0.464464
1607	0.504854	1.5708	0.785398	0.48368	0.960905	0.46477
1608	0.505168	1.5708	0.785398	0.483955	0.960992	0.465076
1609	0.505482	1.5708	0.785398	0.484229	0.961079	0.465383
1610	0.505796	1.5708	0.785398	0.484504	0.961165	0.465689
1611	0.506111	1.5708	0.785398	0.484779	0.961252	0.465995
1612	0.506425	1.5708	0.785398	0.485054	0.961339	0.466301
1613	0.506739	1.5708	0.785398	0.485329	0.961425	0.466607
1614	0.507053	1.5708	0.785398	0.485603	0.961511	0.466913
1615	0.507367	1.5708	0.785398	0.485878	0.961598	0.467219
1616	0.507681	1.5708	0.785398	0.486152	0.961684	0.467525
1617	0.507996	1.5708	0.785398	0.486427	0.96177	0.467831
1618	0.50831	1.5708	0.785398	0.486701	0.961856	0.468137
1619	0.508624	1.5708	0.785398	0.486976	0.961942	0.468442
1620	0.508938	1.5708	0.785398	0.48725	0.962028	0.468748
1621	0.509252	1.5708	0.785398	0.487524	0.962113	0.469054
1622	0.509566	1.5708	0.785398	0.487799	0.962199	0.469359
1623	0.50988	1.5708	0.785398	0.488073	0.962284	0.469665
1624	0.510195	1.5708	0.785398	0.488347	0.96237	0.469971
1625	0.510509	1.5708	0.785398	0.488621	0.962455	0.470276
1626	0.510823	1.5708	0.785398	0.488895	0.96254	0.470582
1627	0.511137	1.5708	0.785398	0.489169	0.962626	0.470887
1628	0.511451	1.5708	0.785398	0.489443	0.962711	0.471192
1629	0.511765	1.5708	0.785398	0.489717	0.962796	0.471498
1630	0.51208	1.5708	0.785398	0.489991	0.96288	0.471803
1631	0.512394	1.5708	0.785398	0.490265	0.962965	0.472108
1632	0.512708	1.5708	0.785398	0.490539	0.96305	0.472413
1633	0.513022	1.5708	0.785398	0.490813	0.963134	0.472718
1634	0.513336	1.5708	0.785398	0.491086	0.963219	0.473024
1635	0.51365	1.5708	0.785398	0.49136	0.963303	0.473329
1636	0.513965	1.5708	0.785398	0.491633	0.963388	0.473634
1637	0.514279	1.5708	0.785398	0.491907	0.963472	0.473938
1638	0.514593	1.5708	0.785398	0.49218	0.963556	0.474243
1639	0.514907	1.5708	0.785398	0.492454	0.96364	0.474548
1640	0.515221	1.5708	0.785398	0.492727	0.963724	0.474853
1641	0.515535	1.5708	0.785398	0.493001	0.963807	0.475158
1642	0.51585	1.5708	0.785398	0.493274	0.963891	0.475462
1643	0.516164	1.5708	0.785398	0.493547	0.963975	0.475767
1644	0.516478	1.5708	0.785398	0.49382	0.964058	0.476072
1645	0.516792	1.5708	0.785398	0.494094	0.964142	0.476376
1646	0.517106	1.5708	0.785398	0.494367	0.964225	0.476681
1647	0.51742	1.5708	0.785398	0.49464	0.964308	0.476985
1648	0.517734	1.5708	0.785398	0.494913	0.964391	0.47729
1649	0.518049	1.5708	0.785398	0.495186	0.964474	0.477594
1650	0.518363	1.5708	0.785398	0.495459	0.964557	0.477898
1651	0.518677	1.5708	0.785398	0.495732	0.96464	0.478203
1652	0.518991	1.5708	0.785398	0.496004	0.964723	0.478507
1653	0.519305	1.5708	0.785398	0.496277	0.964806	0.478811
1654	0.519619	1.5708	0.785398	0.49655	0.964888	0.479115
1655	0.519934	1.5708	0.785398	0.496822	0.964971	0.479419
1656	0.520248	1.5708	0.785398	0.497095	0.965053	0.479723
1657	0.520562	1.5708	0.785398	0.497368	0.965135	0.480027
1658	0.520876	1.5708	0.785398	0.49764	0.965218	0.480331
1659	0.52119	1.5708	0.785398	0.497913	0.9653	0.480635
1660	0.521504	1.5708	0.785398	0.498185	0.965382	0.480939
1661	0.521819	1.5708	0.785398	0.498457	0.965464	0.481243
1662	0.522133	1.5708	0.785398	0.49873	0.965545	0.481546
1663	0.522447	1.5708	0.785398	0.499002	0.965627	0.48185
1664	0.522761	1.5708	0.785398	0.499274	0.965709	0.482154
1665	0.523075	1.5708	0.785398	0.499546	0.96579	0.482457
1666	0.523389	1.5708	0.785398	0.499819	0.965872	0.482761
1667	0.523703	1.5708	0.785398	0.500091	0.965953	0.483064
1668	0.524018	1.5708	0.785398	0.500363	0.966034	0.483367
1669	0.524332	1.5708	0.785398	0.500635	0.966115	0.483671
1670	0.524646	1.5708	0.785398	0.500907	0.966196	0.483974
1671	0.52496	1.5708	0.785398	0.501179	0.966277	0.484277
1672	0.525274	1.5708	0.785398	0.50145	0.966358	0.484581
1673	0.525588	1.5708	0.785398	0.501722	0.966439	0.484884
1674	0.525903	1.5708	0.785398	0.501994	0.96652	0.485187
1675	0.526217	1.5708	0.785398	0.502266	0.9666	0.48549
1676	0.526531	1.5708	0.785398	0.502537	0.966681	0.485793
1677	0.526845	1.5708	0.785398	0.502809	0.966761	0.486096
1678	0.527159	1.5708	0.785398	0.50308	0.966841	0.486399
1679	0.527473	1.5708	0.785398	0.503352	0.966921	0.486702
1680	0.527788	1.5708	0.785398	0.503623	0.967001	0.487004
1681	0.528102	1.5708	0.785398	0.503895	0.967081	0.487307
1682	0.528416	1.5708	0.785398	0.504166	0.967161	0.48761
1683	0.52873	1.5708	0.785398	0.504437	0.967241	0.487912
1684	0.529044	1.5708	0.785398	0.504708	0.967321	0.488215
1685	0.529358	1.5708	0.785398	0.50498	0.9674	0.488518
1686	0.529673	1.5708	0.785398	0.505251	0.96748	0.48882
1687	0.529987	1.5708	0.785398	0.505522	0.967559	0.489122
1688	0.530301	1.5708	0.785398	0.505793	0.967639	0.489425
1689	0.530615	1.5708	0.785398	0.506064	0.967718	0.489727
1690	0.530929	1.5708	0.785398	0.506335	0.967797	0.490029
1691	0.531243	1.5708	0.785398	0.506606	0.967876	0.490332
1692	0.531557	1.5708	0.785398	0.506877	0.967955	0.490634
1693	0.531872	1.5708	0.785398	0.507147	0.968034	0.490936
1694	0.532186	1.5708	0.785398	0.507418	0.968113	0.491238
1695	0.5325	1.5708	0.785398	0.507689	0.968191	0.49154
1696	0.532814	1.5708	0.785398	0.507959	0.96827	0.491842
1697	0.533128	1.5708	0.785398	0.50823	0.968348	0.492144
1698	0.533442	1.5708	0.785398	0.5085	0.968427	0.492445
1699	0.533757	1.5708	0.785398	0.508771	0.968505	0.492747
1700	0.534071	1.5708	0.785398	0.509041	0.968583	0.493049
1701	0.534385	1.5708	0.785398	0.509312	0.968661	0.493351
1702	0.534699	1.5708	0.785398	0.509582	0.968739	0.493652
1703	0.535013	1.5708	0.785398	0.509852	0.968817	0.493954
1704	0.535327	1.5708	0.785398	0.510123	0.968895	0.494255
1705	0.535642	1.5708	0.785398	0.510393	0.968973	0.494557
1706	0.535956	1.5708	0.785398	0.510663	0.96905	0.494858
1707	0.53627	1.5708	0.785398	0.510933	0.969128	0.495159
1708	0.536584	1.5708	0.785398	0.511203	0.969205	0.495461
1709	0.536898	1.5708	0.785398	0.511473	0.969282	0.495762
1710	0.537212	1.5708	0.785398	0.511743	0.96936	0.496063
1711	0.537527	1.5708	0.785398	0.512013	0.969437	0.496364
1712	0.537841	1.5708	0.785398	0.512283	0.969514	0.496665
1713	0.538155	1.5708	0.785398	0.512552	0.969591	0.496966
1714	0.538469	1.5708	0.785398	0.512822	0.969668	0.497267
1715	0.538783	1.5708	0.785398	0.513092	0.969744	0.497568
1716	0.539097	1.5708	0.785398	0.513362	0.969821	0.497869
1717	0.539411	1.5708	0.785398	0.513631	0.969898	0.49817
1718	0.539726	1.5708	0.785398	0.513901	0.969974	0.49847
1719	0.54004	1.5708	0.785398	0.51417	0.97005	0.498771
1720	0.540354	1.5708	0.785398	0.51444	0.970127	0.499071
1721	0.540668	1.5708	0.785398	0.514709	0.970203	0.499372
1722	0.540982	1.5708	0.785398	0.514978	0.970279	0.499672
1723	0.541296	1.5708	0.785398	0.515248	0.970355	0.499973
1724	0.541611	1.5708	0.785398	0.515517	0.970431	0.500273
1725	0.541925	1.5708	0.785398	0.515786	0.970506	0.500574
1726	0.542239	1.5708	0.785398	0.516055	0.970582	0.500874
1727	0.542553	1.5708	0.785398	0.516324	0.970658	0.501174
1728	0.542867	1.5708	0.785398	0.516593	0.970733	0.501474
1729	0.543181	1.5708	0.785398	0.516862	0.970809	0.501774
1730	0.543496	1.5708	0.785398	0.517131	0.970884	0.502074
1731	0.54381	1.5708	0.785398	0.5174	0.970959	0.502374
1732	0.544124	1.5708	0.785398	0.517669	0.971034	0.502674
1733	0.544438	1.5708	0.785398	0.517937	0.971109	0.502974
1734	0.544752	1.5708	0.785398	0.518206	0.971184	0.503274
1735	0.545066	1.5708	0.785398	0.518475	0.971259	0.503573
1736	0.54538	1.5708	0.785398	0.518743	0.971334	0.503873
1737	0.545695	1.5708	0.785398	0.519012	0.971408	0.504173
1738	0.546009	1.5708	0.785398	0.51928	0.971483	0.504472
1739	0.546323	1.5708	0.785398	0.519549	0.971557	0.504772
1740	0.546637	1.5708	0.785398	0.519817	0.971632	0.505071
1741	0.546951	1.5708	0.785398	0.520086	0.971706	0.50537
1742	0.547265	1.5708	0.785398	0.520354	0.97178	0.50567
1743	0.54758	1.5708	0.785398	0.520622	0.971854	0.505969
1744	0.547894	1.5708	0.785398	0.52089	0.971928	0.506268
1745	0.548208	1.5708	0.785398	0.521159	0.972002	0.506567
1746	0.548522	1.5708	0.785398	0.521427	0.972076	0.506866
1747	0.548836	1.5708	0.785398	0.521695	0.972149	0.507165
1748	0.54915	1.5708	0.785398	0.521963	0.972223	0.507464
1749	0.549465	1.5708	0.785398	0.522231	0.972297	0.507763
1750	0.549779	1.5708	0.785398	0.522499	0.97237	0.508062
1751	0.550093	1.5708	0.785398	0.522766	0.972443	0.508361
1752	0.550407	1.5708	0.785398	0.523034	0.972516	0.508659
1753	0.550721	1.5708	0.785398	0.523302	0.97259	0.508958
1754	0.551035	1.5708	0.785398	0.52357	0.972663	0.509257
1755	0.55135	1.5708	0.785398	0.523837	0.972735	0.509555
1756	0.551664	1.5708	0.785398	0.524105	0.972808	0.509853
1757	0.551978	1.5708	0.785398	0.524372	0.972881	0.510152
1758	0.552292	1.5708	0.785398	0.52464	0.972954	0.51045
1759	0.552606	1.5708	0.785398	0.524907	0.973026	0.510748
1760	0.55292	1.5708	0.785398	0.525175	0.973099	0.511047
1761	0.553234	1.5708	0.785398	0.525442	0.973171	0.511345
1762	0.553549	1.5708	0.785398	0.525709	0.973243	0.511643
1763	0.553863	1.5708	0.785398	0.525976	0.973315	0.511941
1764	0.554177	1.5708	0.785398	0.526244	0.973387	0.512239
1765	0.554491	1.5708	0.785398	0.526511	0.973459	0.512537
1766	0.554805	1.5708	0.785398	0.526778	0.973531	0.512835
1767	0.555119	1.5708	0.785398	0.527045	0.973603	0.513132
1768	0.555434	1.5708	0.785398	0.527312	0.973674	0.51343
1769	0.555748	1.5708	0.785398	0.527579	0.973746	0.513728
1770	0.556062	1.5708	0.785398	0.527846	0.973817	0.514025
1771	0.556376	1.5708	0.785398	0.528112	0.973889	0.514323
1772	0.55669	1.5708	0.785398	0.528379	0.97396	0.51462
1773	0.557004	1.5708	0.785398	0.528646	0.974031	0.514918
1774	0.557319	1.5708	0.785398	0.528912	0.974102	0.515215
1775	0.557633	1.5708	0.785398	0.529179	0.974173	0.515512
1776	0.557947	1.5708	0.785398	0.529446	0.974244	0.515809
1777	0.558261	1.5708	0.785398	0.529712	0.974315	0.516106
1778	0.558575	1.5708	0.785398	0.529978	0.974386	0.516403
1779	0.558889	1.5708	0.785398	0.530245	0.974456	0.5167
1780	0.559203	1.5708	0.785398	0.530511	0.974527	0.516997
1781	0.559518	1.5708	0.785398	0.530777	0.974597	0.517294
1782	0.559832	1.5708	0.785398	0.531044	0.974668	0.517591
1783	0.560146	1.5708	0.785398	0.53131	0.974738	0.517888
1784	0.56046	1.5708	0.785398	0.531576	0.974808	0.518184
1785	0.560774	1.5708	0.785398	0.531842	0.974878	0.518481
1786	0.561088	1.5708	0.785398	0.532108	0.974948	0.518778
1787	0.561403	1.5708	0.785398	0.532374	0.975018	0.519074
1788	0.561717	1.5708	0.785398	0.53264	0.975087	0.519371
1789	0.562031	1.5708	0.785398	0.532906	0.975157	0.519667
1790	0.562345	1.5708	0.785398	0.533172	0.975227	0.519963
1791	0.562659	1.5708	0.785398	0.533437	0.975296	0.520259
1792	0.562973	1.5708	0.785398	0.533703	0.975365	0.520556
1793	0.563288	1.5708	0.785398	0.533969	0.975435	0.520852
1794	0.563602	1.5708	0.785398	0.534234	0.975504	0.521148
1795	0.563916	1.5708	0.785398	0.5345	0.975573	0.521444
1796	0.56423	1.5708	0.785398	0.534765	0.975642	0.521739
1797	0.564544	1.5708	0.785398	0.535031	0.975711	0.522035
1798	0.564858	1.5708	0.785398	0.535296	0.97578	0.522331
1799	0.565173	1.5708	0.785398	0.535562	0.975848	0.522627
1800	0.565487	1.5708	0.785398	0.535827	0.975917	0.522922
1801	0.565801	1.5708	0.785398	0.536092	0.975985	0.523218
1802	0.566115	1.5708	0.785398	0.536357	0.976054	0.523513
1803	0.566429	1.5708	0.785398	0.536622	0.976122	0.523809
1804	0.566743	1.5708	0.785398	0.536887	0.97619	0.524104
1805	0.567057	1.5708	0.785398	0.537152	0.976258	0.524399
1806	0.567372	1.5708	0.785398	0.537417	0.976326	0.524695
1807	0.567686	1.5708	0.785398	0.537682	0.976394	0.52499
1808	0.568	1.5708	0.785398	0.537947	0.976462	0.525285
1809	0.568314	1.5708	0.785398	0.538212	0.97653	0.52558
1810	0.568628	1.5708	0.785398	0.538477	0.976597	0.525875
1811	0.568942	1.5708	0.785398	0.538741	0.976665	0.52617
1812	0.569257	1.5708	0.785398	0.539006	0.976732	0.526465
1813	0.569571	1.5708	0.785398	0.539271	0.9768	0.526759
1814	0.569885	1.5708	0.785398	0.539535	0.976867	0.527054
1815	0.570199	1.5708	0.785398	0.5398	0.976934	0.527349
1816	0.570513	1.5708	0.785398	0.540064	0.977001	0.527643
1817	0.570827	1.5708	0.785398	0.540328	0.977068	0.527938
1818	0.571142	1.5708	0.785398	0.540593	0.977135	0.528232
1819	0.571456	1.5708	0.785398	0.540857	0.977201	0.528526
1820	0.57177	1.5708	0.785398	0.541121	0.977268	0.528821
1821	0.572084	1.5708	0.785398	0.541385	0.977335	0.529115
1822	0.572398	1.5708	0.785398	0.54165	0.977401	0.529409
1823	0.572712	1.5708	0.785398	0.541914	0.977468	0.529703
1824	0.573027	1.5708	0.785398	0.542178	0.977534	0.529997
1825	0.573341	1.5708	0.785398	0.542442	0.9776	0.530291
1826	0.573655	1.5708	0.785398	0.542705	0.977666	0.530585
1827	0.573969	1.5708	0.785398	0.542969	0.977732	0.530878
1828	0.574283	1.5708	0.785398	0.543233	0.977798	0.531172
1829	0.574597	1.5708	0.785398	0.543497	0.977864	0.531466
1830	0.574911	1.5708	0.785398	0.54376	0.977929	0.531759
1831	0.575226	1.5708	0.785398	0.544024	0.977995	0.532053
1832	0.57554	1.5708	0.785398	0.544288	0.97806	0.532346
1833	0.575854	1.5708	0.785398	0.544551	0.978126	0.53264
1834	0.576168	1.5708	0.785398	0.544815	0.978191	0.532933
1835	0.576482	1.5708	0.785398	0.545078	0.978256	0.533226
1836	0.576796	1.5708	0.785398	0.545341	0.978321	0.533519
1837	0.577111	1.5708	0.785398	0.545605	0.978386	0.533812
1838	0.577425	1.5708	0.785398	0.545868	0.978451	0.534105
1839	0.577739	1.5708	0.785398	0.546131	0.978516	0.534398
1840	0.578053	1.5708	0.785398	0.546394	0.978581	0.534691
1841	0.578367	1.5708	0.785398	0.546657	0.978646	0.534984
1842	0.578681	1.5708	0.785398	0.54692	0.97871	0.535277
1843	0.578996	1.5708	0.785398	0.547183	0.978774	0.535569
1844	0.57931	1.5708	0.785398	0.547446	0.978839	0.535862
1845	0.579624	1.5708	0.785398	0.547709	0.978903	0.536154
1846	0.579938	1.5708	0.785398	0.547972	0.978967	0.536447
1847	0.580252	1.5708	0.785398	0.548235	0.979031	0.536739
1848	0.580566	1.5708	0.785398	0.548498	0.979095	0.537031
1849	0.58088	1.5708	0.785398	0.54876	0.979159	0.537324
1850	0.581195	1.5708	0.785398	0.549023	0.979223	0.537616
1851	0.581509	1.5708	0.785398	0.549285	0.979286	0.537908
1852	0.581823	1.5708	0.785398	0.549548	0.97935	0.5382
1853	0.582137	1.5708	0.785398	0.54981	0.979413	0.538492
1854	0.582451	1.5708	0.785398	0.550073	0.979477	0.538783
1855	0.582765	1.5708	0.785398	0.550335	0.97954	0.539075
1856	0.58308	1.5708	0.785398	0.550597	0.979603	0.539367
1857	0.583394	1.5708	0.785398	0.55086	0.979666	0.539659
1858	0.583708	1.5708	0.785398	0.551122	0.979729	0.53995
1859	0.584022	1.5708	0.785398	0.551384	0.979792	0.540242
1860	0.584336	1.5708	0.785398	0.551646	0.979855	0.540533
1861	0.58465	1.5708	0.785398	0.551908	0.979918	0.540824
1862	0.584965	1.5708	0.785398	0.55217	0.97998	0.541116
1863	0.585279	1.5708	0.785398	0.552432	0.980043	0.541407
1864	0.585593	1.5708	0.785398	0.552694	0.980105	0.541698
1865	0.585907	1.5708	0.785398	0.552955	0.980168	0.541989
1866	0.586221	1.5708	0.785398	0.553217	0.98023	0.54228
1867	0.586535	1.5708	0.785398	0.553479	0.980292	0.542571
1868	0.58685	1.5708	0.785398	0.55374	0.980354	0.542862
1869	0.587164	1.5708	0.785398	0.554002	0.980416	0.543152
1870	0.587478	1.5708	0.785398	0.554263	0.980478	0.543443
1871	0.587792	1.5708	0.785398	0.554525	0.980539	0.543734
1872	0.588106	1.5708	0.785398	0.554786	0.980601	0.544024
1873	0.58842	1.5708	0.785398	0.555048	0.980663	0.544314
1874	0.588734	1.5708	0.785398	0.555309	0.980724	0.544605
1875	0.589049	1.5708	0.785398	0.55557	0.980785	0.544895
1876	0.589363	1.5708	0.785398	0.555831	0.980847	0.545185
1877	0.589677	1.5708	0.785398	0.556093	0.980908	0.545475
1878	0.589991	1.5708	0.785398	0.556354	0.980969	0.545766
1879	0.590305	1.5708	0.785398	0.556615	0.98103	0.546055
1880	0.590619	1.5708	0.785398	0.556876	0.981091	0.546345
1881	0.590934	1.5708	0.785398	0.557137	0.981151	0.546635
1882	0.591248	1.5708	0.785398	0.557397	0.981212	0.546925
1883	0.591562	1.5708	0.785398	0.557658	0.981272	0.547215
1884	0.591876	1.5708	0.785398	0.557919	0.981333	0.547504
1885	0.59219	1.5708	0.785398	0.55818	0.981393	0.547794
1886	0.592504	1.5708	0.785398	0.55844	0.981454	0.548083
1887	0.592819	1.5708	0.785398	0.558701	0.981514	0.548373
1888	0.593133	1.5708	0.785398	0.558961	0.981574	0.548662
1889	0.593447	1.5708	0.785398	0.559222	0.981634	0.548951
1890	0.593761	1.5708	0.785398	0.559482	0.981694	0.54924
1891	0.594075	1.5708	0.785398	0.559743	0.981754	0.549529
1892	0.594389	1.5708	0.785398	0.560003	0.981813	0.549818
1893	0.594703	1.5708	0.785398	0.560263	0.981873	0.550107
1894	0.595018	1.5708	0.785398	0.560523	0.981932	0.550396
1895	0.595332	1.5708	0.785398	0.560784	0.981992	0.550685
1896	0.595646	1.5708	0.785398	0.561044	0.982051	0.550973
1897	0.59596	1.5708	0.785398	0.561304	0.98211	0.551262
1898	0.596274	1.5708	0.785398	0.561564	0.982169	0.551551
1899	0.596588	1.5708	0.785398	0.561824	0.982228	0.551839
1900	0.596903	1.5708	0.785398	0.562083	0.982287	0.552127
1901	0.597217	1.5708	0.785398	0.562343	0.982346	0.552416
1902	0.597531	1.5708	0.785398	0.562603	0.982405	0.552704
1903	0.597845	1.5708	0.785398	0.562863	0.982463	0.552992
1904	0.598159	1.5708	0.785398	0.563122	0.982522	0.55328
1905	0.598473	1.5708	0.785398	0.563382	0.98258	0.553568
1906	0.598788	1.5708	0.785398	0.563641	0.982639	0.553856
1907	0.599102	1.5708	0.785398	0.563901	0.982697	0.554144
1908	0.599416	1.5708	0.785398	0.56416	0.982755	0.554431
1909	0.59973	1.5708	0.785398	0.56442	0.982813	0.554719
1910	0.600044	1.5708	0.785398	0.564679	0.982871	0.555007
1911	0.600358	1.5708	0.785398	0.564938	0.982929	0.555294
1912	0.600673	1.5708	0.785398	0.565197	0.982987	0.555582
1913	0.600987	1.5708	0.785398	0.565457	0.983044	0.555869
1914	0.601301	1.5708	0.785398	0.565716	0.983102	0.556156
1915	0.601615	1.5708	0.785398	0.565975	0.983159	0.556443
1916	0.601929	1.5708	0.785398	0.566234	0.983217	0.55673
1917	0.602243	1.5708	0.785398	0.566493	0.983274	0.557017
1918	0.602557	1.5708	0.785398	0.566751	0.983331	0.557304
1919	0.602872	1.5708	0.785398	0.56701	0.983388	0.557591
1920	0.603186	1.5708	0.785398	0.567269	0.983445	0.557878
1921	0.6035	1.5708	0.785398	0.567528	0.983502	0.558165
1922	0.603814	1.5708	0.785398	0.567786	0.983559	0.558451
1923	0.604128	1.5708	0.785398	0.568045	0.983616	0.558738
1924	0.604442	1.5708	0.785398	0.568303	0.983672	0.559024
1925	0.604757	1.5708	0.785398	0.568562	0.983729	0.559311
1926	0.605071	1.5708	0.785398	0.56882	0.983785	0.559597
1927	0.605385	1.5708	0.785398	0.569079	0.983841	0.559883
1928	0.605699	1.5708	0.785398	0.569337	0.983898	0.560169
1929	0.606013	1.5708	0.785398	0.569595	0.983954	0.560455
1930	0.606327	1.5708	0.785398	0.569853	0.98401	0.560741
1931	0.606642	1.5708	0.785398	0.570111	0.984066	0.561027
1932	0.606956	1.5708	0.785398	0.57037	0.984121	0.561313
1933	0.60727	1.5708	0.785398	0.570628	0.984177	0.561599
1934	0.607584	1.5708	0.785398	0.570886	0.984233	0.561884
1935	0.607898	1.5708	0.785398	0.571143	0.984288	0.56217
1936	0.608212	1.5708	0.785398	0.571401	0.984344	0.562455
1937	0.608526	1.5708	0.785398	0.571659	0.984399	0.562741
1938	0.608841	1.5708	0.785398	0.571917	0.984454	0.563026
1939	0.609155	1.5708	0.785398	0.572175	0.984509	0.563311
1940	0.609469	1.5708	0.785398	0.572432	0.984564	0.563596
1941	0.609783	1.5708	0.785398	0.57269	0.984619	0.563881
1942	0.610097	1.5708	0.785398	0.572947	0.984674	0.564166
1943	0.610411	1.5708	0.785398	0.573205	0.984729	0.564451
1944	0.610726	1.5708	0.785398	0.573462	0.984783	0.564736
1945	0.61104	1.5708	0.785398	0.573719	0.984838	0.565021
1946	0.611354	1.5708	0.785398	0.573977	0.984892	0.565305
1947	0.611668	1.5708	0.785398	0.574234	0.984947	0.56559
1948	0.611982	1.5708	0.785398	0.574491	0.985001	0.565874
1949	0.612296	1.5708	0.785398	0.574748	0.985055	0.566159
1950	0.612611	1.5708	0.785398	0.575005	0.985109	0.566443
1951	0.612925	1.5708	0.785398	0.575262	0.985163	0.566727
1952	0.613239	1.5708	0.785398	0.575519	0.985217	0.567011
1953	0.613553	1.5708	0.785398	0.575776	0.985271	0.567295
1954	0.613867	1.5708	0.785398	0.576033	0.985325	0.567579
1955	0.614181	1.5708	0.785398	0.57629	0.985378	0.567863
1956	0.614496	1.5708	0.785398	0.576546	0.985432	0.568147
1957	0.61481	1.5708	0.785398	0.576803	0.985485	0.568431
1958	0.615124	1.5708	0.785398	0.57706	0.985538	0.568714
1959	0.615438	1.5708	0.785398	0.577316	0.985592	0.568998
1960	0.615752	1.5708	0.785398	0.577573	0.985645	0.569281
1961	0.616066	1.5708	0.785398	0.577829	0.985698	0.569565
1962	0.61638	1.5708	0.785398	0.578086	0.98575	0.569848
1963	0.616695	1.5708	0.785398	0.578342	0.985803	0.570131
1964	0.617009	1.5708	0.785398	0.578598	0.985856	0.570414
1965	0.617323	1.5708	0.785398	0.578854	0.985909	0.570697
1966	0.617637	1.5708	0.785398	0.57911	0.985961	0.57098
1967	0.617951	1.5708	0.785398	0.579367	0.986013	0.571263
1968	0.618265	1.5708	0.785398	0.579623	0.986066	0.571546
1969	0.61858	1.5708	0.785398	0.579879	0.986118	0.571829
1970	0.618894	1.5708	0.785398	0.580134	0.98617	0.572111
1971	0.619208	1.5708	0.785398	0.58039	0.986222	0.572394
1972	0.619522	1.5708	0.785398	0.580646	0.986274	0.572676
1973	0.619836	1.5708	0.785398	0.580902	0.986326	0.572959
1974	0.62015	1.5708	0.785398	0.581158	0.986378	0.573241
1975	0.620465	1.5708	0.785398	0.581413	0.986429	0.573523
1976	0.620779	1.5708	0.785398	0.581669	0.986481	0.573805
1977	0.621093	1.5708	0.785398	0.581924	0.986532	0.574087
1978	0.621407	1.5708	0.785398	0.58218	0.986584	0.574369
1979	0.621721	1.5708	0.785398	0.582435	0.986635	0.574651
1980	0.622035	1.5708	0.785398	0.58269	0.986686	0.574933
1981	0.62235	1.5708	0.785398	0.582946	0.986737	0.575214
1982	0.622664	1.5708	0.785398	0.583201	0.986788	0.575496
1983	0.622978	1.5708	0.785398	0.583456	0.986839	0.575777
1984	0.623292	1.5708	0.785398	0.583711	0.98689	0.576059
1985	0.623606	1.5708	0.785398	0.583966	0.98694	0.57634
1986	0.62392	1.5708	0.785398	0.584221	0.986991	0.576621
1987	0.624234	1.5708	0.785398	0.584476	0.987041	0.576902
1988	0.624549	1.5708	0.785398	0.584731	0.987092	0.577183
1989	0.624863	1.5708	0.785398	0.584986	0.987142	0.577464
1990	0.625177	1.5708	0.785398	0.585241	0.987192	0.577745
1991	0.625491	1.5708	0.785398	0.585495	0.987242	0.578026
1992	0.625805	1.5708	0.785398	0.58575	0.987292	0.578306
1993	0.626119	1.5708	0.785398	0.586005	0.987342	0.578587
1994	0.626434	1.5708	0.785398	0.586259	0.987392	0.578868
1995	0.626748	1.5708	0.785398	0.586514	0.987441	0.579148
1996	0.627062	1.5708	0.785398	0.586768	0.987491	0.579428
1997	0.627376	1.5708	0.785398	0.587023	0.98754	0.579708
1998	0.62769	1.5708	0.785398	0.587277	0.98759	0.579989
[truncated: 8,004 more rows]

## Sheet: 45-67.5
Step(i)	Time/Angle(θ)	Setting(a=45)	Setting(b=67.5)	EAlice	Ebob	Joint intensity
0	0	1.5708	2.35619	6.12574e-17	-0.707107	-4.33155e-17
1	0.000314159	1.5708	2.35619	0.000314159	-0.706885	-0.000222074
2	0.000628319	1.5708	2.35619	0.000628318	-0.706662	-0.000444009
3	0.000942478	1.5708	2.35619	0.000942478	-0.70644	-0.000665804
4	0.00125664	1.5708	2.35619	0.00125664	-0.706218	-0.000887459
5	0.0015708	1.5708	2.35619	0.0015708	-0.705995	-0.00110897
6	0.00188496	1.5708	2.35619	0.00188495	-0.705773	-0.00133035
7	0.00219911	1.5708	2.35619	0.00219911	-0.70555	-0.00155158
8	0.00251327	1.5708	2.35619	0.00251327	-0.705327	-0.00177268
9	0.00282743	1.5708	2.35619	0.00282743	-0.705105	-0.00199363
10	0.00314159	1.5708	2.35619	0.00314159	-0.704882	-0.00221445
11	0.00345575	1.5708	2.35619	0.00345575	-0.704659	-0.00243512
12	0.00376991	1.5708	2.35619	0.0037699	-0.704436	-0.00265565
13	0.00408407	1.5708	2.35619	0.00408406	-0.704213	-0.00287605
14	0.00439823	1.5708	2.35619	0.00439822	-0.70399	-0.0030963
15	0.00471239	1.5708	2.35619	0.00471237	-0.703767	-0.00331641
16	0.00502655	1.5708	2.35619	0.00502653	-0.703544	-0.00353638
17	0.00534071	1.5708	2.35619	0.00534068	-0.70332	-0.00375621
18	0.00565487	1.5708	2.35619	0.00565484	-0.703097	-0.0039759
19	0.00596903	1.5708	2.35619	0.00596899	-0.702873	-0.00419545
20	0.00628319	1.5708	2.35619	0.00628314	-0.70265	-0.00441485
21	0.00659734	1.5708	2.35619	0.0065973	-0.702426	-0.00463412
22	0.0069115	1.5708	2.35619	0.00691145	-0.702203	-0.00485324
23	0.00722566	1.5708	2.35619	0.0072256	-0.701979	-0.00507222
24	0.00753982	1.5708	2.35619	0.00753975	-0.701755	-0.00529106
25	0.00785398	1.5708	2.35619	0.0078539	-0.701531	-0.00550976
26	0.00816814	1.5708	2.35619	0.00816805	-0.701308	-0.00572831
27	0.0084823	1.5708	2.35619	0.0084822	-0.701084	-0.00594673
28	0.00879646	1.5708	2.35619	0.00879635	-0.700859	-0.006165
29	0.00911062	1.5708	2.35619	0.00911049	-0.700635	-0.00638313
30	0.00942478	1.5708	2.35619	0.00942464	-0.700411	-0.00660112
31	0.00973894	1.5708	2.35619	0.00973878	-0.700187	-0.00681897
32	0.0100531	1.5708	2.35619	0.0100529	-0.699963	-0.00703667
33	0.0103673	1.5708	2.35619	0.0103671	-0.699738	-0.00725423
34	0.0106814	1.5708	2.35619	0.0106812	-0.699514	-0.00747165
35	0.0109956	1.5708	2.35619	0.0109954	-0.699289	-0.00768893
36	0.0113097	1.5708	2.35619	0.0113095	-0.699065	-0.00790607
37	0.0116239	1.5708	2.35619	0.0116236	-0.69884	-0.00812306
38	0.0119381	1.5708	2.35619	0.0119378	-0.698615	-0.00833991
39	0.0122522	1.5708	2.35619	0.0122519	-0.69839	-0.00855661
40	0.0125664	1.5708	2.35619	0.012566	-0.698165	-0.00877317
41	0.0128805	1.5708	2.35619	0.0128802	-0.69794	-0.00898959
42	0.0131947	1.5708	2.35619	0.0131943	-0.697715	-0.00920587
43	0.0135088	1.5708	2.35619	0.0135084	-0.69749	-0.009422
44	0.013823	1.5708	2.35619	0.0138226	-0.697265	-0.009638
45	0.0141372	1.5708	2.35619	0.0141367	-0.69704	-0.00985384
46	0.0144513	1.5708	2.35619	0.0144508	-0.696815	-0.0100695
47	0.0147655	1.5708	2.35619	0.0147649	-0.696589	-0.0102851
48	0.0150796	1.5708	2.35619	0.0150791	-0.696364	-0.0105005
49	0.0153938	1.5708	2.35619	0.0153932	-0.696138	-0.0107158
50	0.015708	1.5708	2.35619	0.0157073	-0.695913	-0.0109309
51	0.0160221	1.5708	2.35619	0.0160214	-0.695687	-0.0111459
52	0.0163363	1.5708	2.35619	0.0163356	-0.695461	-0.0113607
53	0.0166504	1.5708	2.35619	0.0166497	-0.695236	-0.0115754
54	0.0169646	1.5708	2.35619	0.0169638	-0.69501	-0.01179
55	0.0172788	1.5708	2.35619	0.0172779	-0.694784	-0.0120044
56	0.0175929	1.5708	2.35619	0.017592	-0.694558	-0.0122187
57	0.0179071	1.5708	2.35619	0.0179061	-0.694332	-0.0124328
58	0.0182212	1.5708	2.35619	0.0182202	-0.694106	-0.0126468
59	0.0185354	1.5708	2.35619	0.0185343	-0.69388	-0.0128606
60	0.0188496	1.5708	2.35619	0.0188484	-0.693653	-0.0130743
61	0.0191637	1.5708	2.35619	0.0191625	-0.693427	-0.0132878
62	0.0194779	1.5708	2.35619	0.0194766	-0.693201	-0.0135012
63	0.019792	1.5708	2.35619	0.0197907	-0.692974	-0.0137145
64	0.0201062	1.5708	2.35619	0.0201048	-0.692748	-0.0139276
65	0.0204204	1.5708	2.35619	0.0204189	-0.692521	-0.0141405
66	0.0207345	1.5708	2.35619	0.020733	-0.692294	-0.0143534
67	0.0210487	1.5708	2.35619	0.0210471	-0.692068	-0.014566
68	0.0213628	1.5708	2.35619	0.0213612	-0.691841	-0.0147786
69	0.021677	1.5708	2.35619	0.0216753	-0.691614	-0.0149909
70	0.0219911	1.5708	2.35619	0.0219894	-0.691387	-0.0152032
71	0.0223053	1.5708	2.35619	0.0223035	-0.69116	-0.0154153
72	0.0226195	1.5708	2.35619	0.0226175	-0.690933	-0.0156272
73	0.0229336	1.5708	2.35619	0.0229316	-0.690706	-0.015839
74	0.0232478	1.5708	2.35619	0.0232457	-0.690479	-0.0160507
75	0.0235619	1.5708	2.35619	0.0235598	-0.690251	-0.0162622
76	0.0238761	1.5708	2.35619	0.0238738	-0.690024	-0.0164735
77	0.0241903	1.5708	2.35619	0.0241879	-0.689796	-0.0166847
78	0.0245044	1.5708	2.35619	0.024502	-0.689569	-0.0168958
79	0.0248186	1.5708	2.35619	0.024816	-0.689341	-0.0171067
80	0.0251327	1.5708	2.35619	0.0251301	-0.689114	-0.0173175
81	0.0254469	1.5708	2.35619	0.0254442	-0.688886	-0.0175281
82	0.0257611	1.5708	2.35619	0.0257582	-0.688658	-0.0177386
83	0.0260752	1.5708	2.35619	0.0260723	-0.688431	-0.0179489
84	0.0263894	1.5708	2.35619	0.0263863	-0.688203	-0.0181591
85	0.0267035	1.5708	2.35619	0.0267004	-0.687975	-0.0183692
86	0.0270177	1.5708	2.35619	0.0270144	-0.687747	-0.0185791
87	0.0273319	1.5708	2.35619	0.0273285	-0.687519	-0.0187888
88	0.027646	1.5708	2.35619	0.0276425	-0.68729	-0.0189984
89	0.0279602	1.5708	2.35619	0.0279565	-0.687062	-0.0192079
90	0.0282743	1.5708	2.35619	0.0282706	-0.686834	-0.0194172
91	0.0285885	1.5708	2.35619	0.0285846	-0.686605	-0.0196263
92	0.0289027	1.5708	2.35619	0.0288986	-0.686377	-0.0198354
93	0.0292168	1.5708	2.35619	0.0292127	-0.686149	-0.0200442
94	0.029531	1.5708	2.35619	0.0295267	-0.68592	-0.0202529
95	0.0298451	1.5708	2.35619	0.0298407	-0.685691	-0.0204615
96	0.0301593	1.5708	2.35619	0.0301547	-0.685463	-0.0206699
97	0.0304734	1.5708	2.35619	0.0304687	-0.685234	-0.0208782
98	0.0307876	1.5708	2.35619	0.0307827	-0.685005	-0.0210863
99	0.0311018	1.5708	2.35619	0.0310968	-0.684776	-0.0212943
100	0.0314159	1.5708	2.35619	0.0314108	-0.684547	-0.0215021
101	0.0317301	1.5708	2.35619	0.0317248	-0.684318	-0.0217098
102	0.0320442	1.5708	2.35619	0.0320388	-0.684089	-0.0219174
103	0.0323584	1.5708	2.35619	0.0323528	-0.68386	-0.0221247
104	0.0326726	1.5708	2.35619	0.0326668	-0.683631	-0.022332
105	0.0329867	1.5708	2.35619	0.0329807	-0.683401	-0.0225391
106	0.0333009	1.5708	2.35619	0.0332947	-0.683172	-0.022746
107	0.033615	1.5708	2.35619	0.0336087	-0.682942	-0.0229528
108	0.0339292	1.5708	2.35619	0.0339227	-0.682713	-0.0231595
109	0.0342434	1.5708	2.35619	0.0342367	-0.682483	-0.023366
110	0.0345575	1.5708	2.35619	0.0345506	-0.682254	-0.0235723
111	0.0348717	1.5708	2.35619	0.0348646	-0.682024	-0.0237785
112	0.0351858	1.5708	2.35619	0.0351786	-0.681794	-0.0239845
113	0.0355	1.5708	2.35619	0.0354925	-0.681564	-0.0241904
114	0.0358142	1.5708	2.35619	0.0358065	-0.681334	-0.0243962
115	0.0361283	1.5708	2.35619	0.0361205	-0.681104	-0.0246018
116	0.0364425	1.5708	2.35619	0.0364344	-0.680874	-0.0248073
117	0.0367566	1.5708	2.35619	0.0367484	-0.680644	-0.0250126
118	0.0370708	1.5708	2.35619	0.0370623	-0.680414	-0.0252177
119	0.037385	1.5708	2.35619	0.0373762	-0.680184	-0.0254227
120	0.0376991	1.5708	2.35619	0.0376902	-0.679953	-0.0256276
121	0.0380133	1.5708	2.35619	0.0380041	-0.679723	-0.0258323
122	0.0383274	1.5708	2.35619	0.038318	-0.679493	-0.0260368
123	0.0386416	1.5708	2.35619	0.038632	-0.679262	-0.0262412
124	0.0389557	1.5708	2.35619	0.0389459	-0.679031	-0.0264455
125	0.0392699	1.5708	2.35619	0.0392598	-0.678801	-0.0266496
126	0.0395841	1.5708	2.35619	0.0395737	-0.67857	-0.0268535
127	0.0398982	1.5708	2.35619	0.0398876	-0.678339	-0.0270574
128	0.0402124	1.5708	2.35619	0.0402015	-0.678108	-0.027261
129	0.0405265	1.5708	2.35619	0.0405155	-0.677877	-0.0274645
130	0.0408407	1.5708	2.35619	0.0408294	-0.677646	-0.0276679
131	0.0411549	1.5708	2.35619	0.0411432	-0.677415	-0.0278711
132	0.041469	1.5708	2.35619	0.0414571	-0.677184	-0.0280741
133	0.0417832	1.5708	2.35619	0.041771	-0.676953	-0.028277
134	0.0420973	1.5708	2.35619	0.0420849	-0.676722	-0.0284798
135	0.0424115	1.5708	2.35619	0.0423988	-0.67649	-0.0286824
136	0.0427257	1.5708	2.35619	0.0427127	-0.676259	-0.0288848
137	0.0430398	1.5708	2.35619	0.0430265	-0.676028	-0.0290871
138	0.043354	1.5708	2.35619	0.0433404	-0.675796	-0.0292893
139	0.0436681	1.5708	2.35619	0.0436543	-0.675564	-0.0294913
140	0.0439823	1.5708	2.35619	0.0439681	-0.675333	-0.0296931
141	0.0442965	1.5708	2.35619	0.044282	-0.675101	-0.0298948
142	0.0446106	1.5708	2.35619	0.0445958	-0.674869	-0.0300963
143	0.0449248	1.5708	2.35619	0.0449097	-0.674637	-0.0302977
144	0.0452389	1.5708	2.35619	0.0452235	-0.674405	-0.030499
145	0.0455531	1.5708	2.35619	0.0455373	-0.674173	-0.0307001
146	0.0458673	1.5708	2.35619	0.0458512	-0.673941	-0.030901
147	0.0461814	1.5708	2.35619	0.046165	-0.673709	-0.0311018
148	0.0464956	1.5708	2.35619	0.0464788	-0.673477	-0.0313024
149	0.0468097	1.5708	2.35619	0.0467926	-0.673245	-0.0315029
150	0.0471239	1.5708	2.35619	0.0471065	-0.673013	-0.0317032
151	0.047438	1.5708	2.35619	0.0474203	-0.67278	-0.0319034
152	0.0477522	1.5708	2.35619	0.0477341	-0.672548	-0.0321034
153	0.0480664	1.5708	2.35619	0.0480479	-0.672315	-0.0323033
154	0.0483805	1.5708	2.35619	0.0483617	-0.672083	-0.032503
155	0.0486947	1.5708	2.35619	0.0486754	-0.67185	-0.0327026
156	0.0490088	1.5708	2.35619	0.0489892	-0.671617	-0.032902
157	0.049323	1.5708	2.35619	0.049303	-0.671384	-0.0331013
158	0.0496372	1.5708	2.35619	0.0496168	-0.671151	-0.0333004
159	0.0499513	1.5708	2.35619	0.0499306	-0.670919	-0.0334993
160	0.0502655	1.5708	2.35619	0.0502443	-0.670686	-0.0336981
161	0.0505796	1.5708	2.35619	0.0505581	-0.670453	-0.0338968
162	0.0508938	1.5708	2.35619	0.0508718	-0.670219	-0.0340953
163	0.051208	1.5708	2.35619	0.0511856	-0.669986	-0.0342936
164	0.0515221	1.5708	2.35619	0.0514993	-0.669753	-0.0344918
165	0.0518363	1.5708	2.35619	0.0518131	-0.66952	-0.0346899
166	0.0521504	1.5708	2.35619	0.0521268	-0.669286	-0.0348878
167	0.0524646	1.5708	2.35619	0.0524405	-0.669053	-0.0350855
168	0.0527788	1.5708	2.35619	0.0527543	-0.668819	-0.0352831
169	0.0530929	1.5708	2.35619	0.053068	-0.668586	-0.0354805
170	0.0534071	1.5708	2.35619	0.0533817	-0.668352	-0.0356778
171	0.0537212	1.5708	2.35619	0.0536954	-0.668118	-0.0358749
172	0.0540354	1.5708	2.35619	0.0540091	-0.667885	-0.0360718
173	0.0543496	1.5708	2.35619	0.0543228	-0.667651	-0.0362687
174	0.0546637	1.5708	2.35619	0.0546365	-0.667417	-0.0364653
175	0.0549779	1.5708	2.35619	0.0549502	-0.667183	-0.0366618
176	0.055292	1.5708	2.35619	0.0552639	-0.666949	-0.0368582
177	0.0556062	1.5708	2.35619	0.0555775	-0.666715	-0.0370544
178	0.0559203	1.5708	2.35619	0.0558912	-0.66648	-0.0372504
179	0.0562345	1.5708	2.35619	0.0562049	-0.666246	-0.0374463
180	0.0565487	1.5708	2.35619	0.0565185	-0.666012	-0.037642
181	0.0568628	1.5708	2.35619	0.0568322	-0.665777	-0.0378376
182	0.057177	1.5708	2.35619	0.0571458	-0.665543	-0.038033
183	0.0574911	1.5708	2.35619	0.0574595	-0.665309	-0.0382283
184	0.0578053	1.5708	2.35619	0.0577731	-0.665074	-0.0384234
185	0.0581195	1.5708	2.35619	0.0580867	-0.664839	-0.0386184
186	0.0584336	1.5708	2.35619	0.0584004	-0.664605	-0.0388132
187	0.0587478	1.5708	2.35619	0.058714	-0.66437	-0.0390078
188	0.0590619	1.5708	2.35619	0.0590276	-0.664135	-0.0392023
189	0.0593761	1.5708	2.35619	0.0593412	-0.6639	-0.0393966
190	0.0596903	1.5708	2.35619	0.0596548	-0.663665	-0.0395908
191	0.0600044	1.5708	2.35619	0.0599684	-0.66343	-0.0397849
192	0.0603186	1.5708	2.35619	0.060282	-0.663195	-0.0399787
193	0.0606327	1.5708	2.35619	0.0605956	-0.66296	-0.0401724
194	0.0609469	1.5708	2.35619	0.0609092	-0.662725	-0.040366
195	0.0612611	1.5708	2.35619	0.0612227	-0.662489	-0.0405594
196	0.0615752	1.5708	2.35619	0.0615363	-0.662254	-0.0407527
197	0.0618894	1.5708	2.35619	0.0618499	-0.662019	-0.0409458
198	0.0622035	1.5708	2.35619	0.0621634	-0.661783	-0.0411387
199	0.0625177	1.5708	2.35619	0.062477	-0.661547	-0.0413315
200	0.0628319	1.5708	2.35619	0.0627905	-0.661312	-0.0415241
201	0.063146	1.5708	2.35619	0.0631041	-0.661076	-0.0417166
202	0.0634602	1.5708	2.35619	0.0634176	-0.66084	-0.0419089
203	0.0637743	1.5708	2.35619	0.0637311	-0.660605	-0.0421011
204	0.0640885	1.5708	2.35619	0.0640446	-0.660369	-0.0422931
205	0.0644026	1.5708	2.35619	0.0643581	-0.660133	-0.0424849
206	0.0647168	1.5708	2.35619	0.0646716	-0.659897	-0.0426766
207	0.065031	1.5708	2.35619	0.0649851	-0.659661	-0.0428681
208	0.0653451	1.5708	2.35619	0.0652986	-0.659425	-0.0430595
209	0.0656593	1.5708	2.35619	0.0656121	-0.659188	-0.0432507
210	0.0659734	1.5708	2.35619	0.0659256	-0.658952	-0.0434418
211	0.0662876	1.5708	2.35619	0.0662391	-0.658716	-0.0436327
212	0.0666018	1.5708	2.35619	0.0665525	-0.658479	-0.0438235
213	0.0669159	1.5708	2.35619	0.066866	-0.658243	-0.0440141
214	0.0672301	1.5708	2.35619	0.0671794	-0.658006	-0.0442045
215	0.0675442	1.5708	2.35619	0.0674929	-0.65777	-0.0443948
216	0.0678584	1.5708	2.35619	0.0678063	-0.657533	-0.0445849
217	0.0681726	1.5708	2.35619	0.0681198	-0.657296	-0.0447749
218	0.0684867	1.5708	2.35619	0.0684332	-0.65706	-0.0449647
219	0.0688009	1.5708	2.35619	0.0687466	-0.656823	-0.0451543
220	0.069115	1.5708	2.35619	0.06906	-0.656586	-0.0453438
221	0.0694292	1.5708	2.35619	0.0693734	-0.656349	-0.0455332
222	0.0697434	1.5708	2.35619	0.0696868	-0.656112	-0.0457223
223	0.0700575	1.5708	2.35619	0.0700002	-0.655875	-0.0459114
224	0.0703717	1.5708	2.35619	0.0703136	-0.655637	-0.0461002
225	0.0706858	1.5708	2.35619	0.070627	-0.6554	-0.0462889
226	0.071	1.5708	2.35619	0.0709404	-0.655163	-0.0464775
227	0.0713142	1.5708	2.35619	0.0712537	-0.654925	-0.0466659
228	0.0716283	1.5708	2.35619	0.0715671	-0.654688	-0.0468541
229	0.0719425	1.5708	2.35619	0.0718804	-0.654451	-0.0470422
230	0.0722566	1.5708	2.35619	0.0721938	-0.654213	-0.0472301
231	0.0725708	1.5708	2.35619	0.0725071	-0.653975	-0.0474179
232	0.0728849	1.5708	2.35619	0.0728204	-0.653738	-0.0476055
233	0.0731991	1.5708	2.35619	0.0731338	-0.6535	-0.0477929
234	0.0735133	1.5708	2.35619	0.0734471	-0.653262	-0.0479802
235	0.0738274	1.5708	2.35619	0.0737604	-0.653024	-0.0481673
236	0.0741416	1.5708	2.35619	0.0740737	-0.652786	-0.0483543
237	0.0744557	1.5708	2.35619	0.074387	-0.652548	-0.0485411
238	0.0747699	1.5708	2.35619	0.0747003	-0.65231	-0.0487277
239	0.0750841	1.5708	2.35619	0.0750135	-0.652072	-0.0489142
240	0.0753982	1.5708	2.35619	0.0753268	-0.651834	-0.0491006
241	0.0757124	1.5708	2.35619	0.0756401	-0.651595	-0.0492867
242	0.0760265	1.5708	2.35619	0.0759533	-0.651357	-0.0494727
243	0.0763407	1.5708	2.35619	0.0762666	-0.651119	-0.0496586
244	0.0766549	1.5708	2.35619	0.0765798	-0.65088	-0.0498443
245	0.076969	1.5708	2.35619	0.076893	-0.650642	-0.0500298
246	0.0772832	1.5708	2.35619	0.0772063	-0.650403	-0.0502152
247	0.0775973	1.5708	2.35619	0.0775195	-0.650164	-0.0504004
248	0.0779115	1.5708	2.35619	0.0778327	-0.649926	-0.0505855
249	0.0782257	1.5708	2.35619	0.0781459	-0.649687	-0.0507704
250	0.0785398	1.5708	2.35619	0.0784591	-0.649448	-0.0509551
251	0.078854	1.5708	2.35619	0.0787723	-0.649209	-0.0511397
252	0.0791681	1.5708	2.35619	0.0790855	-0.64897	-0.0513241
253	0.0794823	1.5708	2.35619	0.0793986	-0.648731	-0.0515084
254	0.0797965	1.5708	2.35619	0.0797118	-0.648492	-0.0516925
255	0.0801106	1.5708	2.35619	0.080025	-0.648253	-0.0518764
256	0.0804248	1.5708	2.35619	0.0803381	-0.648014	-0.0520602
257	0.0807389	1.5708	2.35619	0.0806512	-0.647774	-0.0522438
258	0.0810531	1.5708	2.35619	0.0809644	-0.647535	-0.0524273
259	0.0813672	1.5708	2.35619	0.0812775	-0.647295	-0.0526106
260	0.0816814	1.5708	2.35619	0.0815906	-0.647056	-0.0527937
261	0.0819956	1.5708	2.35619	0.0819037	-0.646816	-0.0529767
262	0.0823097	1.5708	2.35619	0.0822168	-0.646577	-0.0531595
263	0.0826239	1.5708	2.35619	0.0825299	-0.646337	-0.0533421
264	0.082938	1.5708	2.35619	0.082843	-0.646097	-0.0535246
265	0.0832522	1.5708	2.35619	0.0831561	-0.645858	-0.053707
266	0.0835664	1.5708	2.35619	0.0834691	-0.645618	-0.0538891
267	0.0838805	1.5708	2.35619	0.0837822	-0.645378	-0.0540712
268	0.0841947	1.5708	2.35619	0.0840952	-0.645138	-0.054253
269	0.0845088	1.5708	2.35619	0.0844083	-0.644898	-0.0544347
270	0.084823	1.5708	2.35619	0.0847213	-0.644657	-0.0546162
271	0.0851372	1.5708	2.35619	0.0850343	-0.644417	-0.0547976
272	0.0854513	1.5708	2.35619	0.0853474	-0.644177	-0.0549788
273	0.0857655	1.5708	2.35619	0.0856604	-0.643937	-0.0551599
274	0.0860796	1.5708	2.35619	0.0859734	-0.643696	-0.0553407
275	0.0863938	1.5708	2.35619	0.0862864	-0.643456	-0.0555215
276	0.086708	1.5708	2.35619	0.0865993	-0.643215	-0.055702
277	0.0870221	1.5708	2.35619	0.0869123	-0.642975	-0.0558824
278	0.0873363	1.5708	2.35619	0.0872253	-0.642734	-0.0560627
279	0.0876504	1.5708	2.35619	0.0875382	-0.642493	-0.0562427
280	0.0879646	1.5708	2.35619	0.0878512	-0.642253	-0.0564227
281	0.0882788	1.5708	2.35619	0.0881641	-0.642012	-0.0566024
282	0.0885929	1.5708	2.35619	0.0884771	-0.641771	-0.056782
283	0.0889071	1.5708	2.35619	0.08879	-0.64153	-0.0569614
284	0.0892212	1.5708	2.35619	0.0891029	-0.641289	-0.0571407
285	0.0895354	1.5708	2.35619	0.0894158	-0.641048	-0.0573198
286	0.0898495	1.5708	2.35619	0.0897287	-0.640807	-0.0574988
287	0.0901637	1.5708	2.35619	0.0900416	-0.640565	-0.0576775
288	0.0904779	1.5708	2.35619	0.0903545	-0.640324	-0.0578562
289	0.090792	1.5708	2.35619	0.0906673	-0.640083	-0.0580346
290	0.0911062	1.5708	2.35619	0.0909802	-0.639841	-0.0582129
291	0.0914203	1.5708	2.35619	0.0912931	-0.6396	-0.058391
292	0.0917345	1.5708	2.35619	0.0916059	-0.639358	-0.058569
293	0.0920487	1.5708	2.35619	0.0919187	-0.639117	-0.0587468
294	0.0923628	1.5708	2.35619	0.0922316	-0.638875	-0.0589245
295	0.092677	1.5708	2.35619	0.0925444	-0.638634	-0.0591019
296	0.0929911	1.5708	2.35619	0.0928572	-0.638392	-0.0592793
297	0.0933053	1.5708	2.35619	0.09317	-0.63815	-0.0594564
298	0.0936195	1.5708	2.35619	0.0934828	-0.637908	-0.0596334
299	0.0939336	1.5708	2.35619	0.0937955	-0.637666	-0.0598102
300	0.0942478	1.5708	2.35619	0.0941083	-0.637424	-0.0599869
301	0.0945619	1.5708	2.35619	0.0944211	-0.637182	-0.0601634
302	0.0948761	1.5708	2.35619	0.0947338	-0.63694	-0.0603397
303	0.0951903	1.5708	2.35619	0.0950466	-0.636698	-0.0605159
304	0.0955044	1.5708	2.35619	0.0953593	-0.636455	-0.0606919
305	0.0958186	1.5708	2.35619	0.095672	-0.636213	-0.0608678
306	0.0961327	1.5708	2.35619	0.0959847	-0.63597	-0.0610435
307	0.0964469	1.5708	2.35619	0.0962974	-0.635728	-0.061219
308	0.0967611	1.5708	2.35619	0.0966101	-0.635485	-0.0613943
309	0.0970752	1.5708	2.35619	0.0969228	-0.635243	-0.0615695
310	0.0973894	1.5708	2.35619	0.0972355	-0.635	-0.0617446
311	0.0977035	1.5708	2.35619	0.0975482	-0.634757	-0.0619194
312	0.0980177	1.5708	2.35619	0.0978608	-0.634515	-0.0620941
313	0.0983319	1.5708	2.35619	0.0981735	-0.634272	-0.0622687
314	0.098646	1.5708	2.35619	0.0984861	-0.634029	-0.062443
315	0.0989602	1.5708	2.35619	0.0987987	-0.633786	-0.0626172
316	0.0992743	1.5708	2.35619	0.0991113	-0.633543	-0.0627913
317	0.0995885	1.5708	2.35619	0.099424	-0.6333	-0.0629652
318	0.0999026	1.5708	2.35619	0.0997365	-0.633057	-0.0631389
319	0.100217	1.5708	2.35619	0.100049	-0.632813	-0.0633124
320	0.100531	1.5708	2.35619	0.100362	-0.63257	-0.0634858
321	0.100845	1.5708	2.35619	0.100674	-0.632327	-0.063659
322	0.101159	1.5708	2.35619	0.100987	-0.632083	-0.0638321
323	0.101473	1.5708	2.35619	0.101299	-0.63184	-0.064005
324	0.101788	1.5708	2.35619	0.101612	-0.631596	-0.0641777
325	0.102102	1.5708	2.35619	0.101924	-0.631353	-0.0643503
326	0.102416	1.5708	2.35619	0.102237	-0.631109	-0.0645227
327	0.10273	1.5708	2.35619	0.102549	-0.630865	-0.0646949
328	0.103044	1.5708	2.35619	0.102862	-0.630622	-0.064867
329	0.103358	1.5708	2.35619	0.103174	-0.630378	-0.0650389
330	0.103673	1.5708	2.35619	0.103487	-0.630134	-0.0652106
331	0.103987	1.5708	2.35619	0.103799	-0.62989	-0.0653822
332	0.104301	1.5708	2.35619	0.104112	-0.629646	-0.0655536
333	0.104615	1.5708	2.35619	0.104424	-0.629402	-0.0657248
334	0.104929	1.5708	2.35619	0.104737	-0.629158	-0.0658959
335	0.105243	1.5708	2.35619	0.105049	-0.628913	-0.0660668
336	0.105558	1.5708	2.35619	0.105362	-0.628669	-0.0662376
337	0.105872	1.5708	2.35619	0.105674	-0.628425	-0.0664082
338	0.106186	1.5708	2.35619	0.105986	-0.62818	-0.0665786
339	0.1065	1.5708	2.35619	0.106299	-0.627936	-0.0667488
340	0.106814	1.5708	2.35619	0.106611	-0.627691	-0.0669189
341	0.107128	1.5708	2.35619	0.106924	-0.627447	-0.0670888
342	0.107442	1.5708	2.35619	0.107236	-0.627202	-0.0672586
343	0.107757	1.5708	2.35619	0.107548	-0.626957	-0.0674281
344	0.108071	1.5708	2.35619	0.107861	-0.626713	-0.0675976
345	0.108385	1.5708	2.35619	0.108173	-0.626468	-0.0677668
346	0.108699	1.5708	2.35619	0.108485	-0.626223	-0.0679359
347	0.109013	1.5708	2.35619	0.108797	-0.625978	-0.0681048
348	0.109327	1.5708	2.35619	0.10911	-0.625733	-0.0682736
349	0.109642	1.5708	2.35619	0.109422	-0.625488	-0.0684422
350	0.109956	1.5708	2.35619	0.109734	-0.625243	-0.0686106
351	0.11027	1.5708	2.35619	0.110047	-0.624997	-0.0687788
352	0.110584	1.5708	2.35619	0.110359	-0.624752	-0.0689469
353	0.110898	1.5708	2.35619	0.110671	-0.624507	-0.0691148
354	0.111212	1.5708	2.35619	0.110983	-0.624261	-0.0692826
355	0.111527	1.5708	2.35619	0.111295	-0.624016	-0.0694502
356	0.111841	1.5708	2.35619	0.111608	-0.62377	-0.0696176
357	0.112155	1.5708	2.35619	0.11192	-0.623525	-0.0697848
358	0.112469	1.5708	2.35619	0.112232	-0.623279	-0.0699519
359	0.112783	1.5708	2.35619	0.112544	-0.623034	-0.0701188
360	0.113097	1.5708	2.35619	0.112856	-0.622788	-0.0702856
361	0.113411	1.5708	2.35619	0.113169	-0.622542	-0.0704522
362	0.113726	1.5708	2.35619	0.113481	-0.622296	-0.0706186
363	0.11404	1.5708	2.35619	0.113793	-0.62205	-0.0707848
364	0.114354	1.5708	2.35619	0.114105	-0.621804	-0.0709509
365	0.114668	1.5708	2.35619	0.114417	-0.621558	-0.0711168
366	0.114982	1.5708	2.35619	0.114729	-0.621312	-0.0712826
367	0.115296	1.5708	2.35619	0.115041	-0.621066	-0.0714481
368	0.115611	1.5708	2.35619	0.115353	-0.620819	-0.0716135
369	0.115925	1.5708	2.35619	0.115665	-0.620573	-0.0717788
370	0.116239	1.5708	2.35619	0.115977	-0.620327	-0.0719439
371	0.116553	1.5708	2.35619	0.116289	-0.62008	-0.0721088
372	0.116867	1.5708	2.35619	0.116601	-0.619834	-0.0722735
373	0.117181	1.5708	2.35619	0.116913	-0.619587	-0.0724381
374	0.117496	1.5708	2.35619	0.117225	-0.619341	-0.0726025
375	0.11781	1.5708	2.35619	0.117537	-0.619094	-0.0727667
376	0.118124	1.5708	2.35619	0.117849	-0.618847	-0.0729308
377	0.118438	1.5708	2.35619	0.118161	-0.6186	-0.0730947
378	0.118752	1.5708	2.35619	0.118473	-0.618354	-0.0732584
379	0.119066	1.5708	2.35619	0.118785	-0.618107	-0.0734219
380	0.119381	1.5708	2.35619	0.119097	-0.61786	-0.0735853
381	0.119695	1.5708	2.35619	0.119409	-0.617613	-0.0737485
382	0.120009	1.5708	2.35619	0.119721	-0.617365	-0.0739116
383	0.120323	1.5708	2.35619	0.120033	-0.617118	-0.0740745
384	0.120637	1.5708	2.35619	0.120345	-0.616871	-0.0742372
385	0.120951	1.5708	2.35619	0.120657	-0.616624	-0.0743997
386	0.121265	1.5708	2.35619	0.120968	-0.616376	-0.0745621
387	0.12158	1.5708	2.35619	0.12128	-0.616129	-0.0747243
388	0.121894	1.5708	2.35619	0.121592	-0.615882	-0.0748864
389	0.122208	1.5708	2.35619	0.121904	-0.615634	-0.0750482
390	0.122522	1.5708	2.35619	0.122216	-0.615386	-0.0752099
391	0.122836	1.5708	2.35619	0.122528	-0.615139	-0.0753715
392	0.12315	1.5708	2.35619	0.122839	-0.614891	-0.0755328
393	0.123465	1.5708	2.35619	0.123151	-0.614643	-0.075694
394	0.123779	1.5708	2.35619	0.123463	-0.614395	-0.075855
395	0.124093	1.5708	2.35619	0.123775	-0.614147	-0.0760159
396	0.124407	1.5708	2.35619	0.124086	-0.6139	-0.0761766
397	0.124721	1.5708	2.35619	0.124398	-0.613651	-0.0763371
398	0.125035	1.5708	2.35619	0.12471	-0.613403	-0.0764974
399	0.12535	1.5708	2.35619	0.125022	-0.613155	-0.0766576
400	0.125664	1.5708	2.35619	0.125333	-0.612907	-0.0768176
401	0.125978	1.5708	2.35619	0.125645	-0.612659	-0.0769775
402	0.126292	1.5708	2.35619	0.125957	-0.61241	-0.0771371
403	0.126606	1.5708	2.35619	0.126268	-0.612162	-0.0772966
404	0.12692	1.5708	2.35619	0.12658	-0.611914	-0.0774559
405	0.127235	1.5708	2.35619	0.126891	-0.611665	-0.0776151
406	0.127549	1.5708	2.35619	0.127203	-0.611417	-0.0777741
407	0.127863	1.5708	2.35619	0.127515	-0.611168	-0.0779329
408	0.128177	1.5708	2.35619	0.127826	-0.610919	-0.0780915
409	0.128491	1.5708	2.35619	0.128138	-0.61067	-0.07825
410	0.128805	1.5708	2.35619	0.128449	-0.610422	-0.0784083
411	0.129119	1.5708	2.35619	0.128761	-0.610173	-0.0785665
412	0.129434	1.5708	2.35619	0.129073	-0.609924	-0.0787244
413	0.129748	1.5708	2.35619	0.129384	-0.609675	-0.0788822
414	0.130062	1.5708	2.35619	0.129696	-0.609426	-0.0790398
415	0.130376	1.5708	2.35619	0.130007	-0.609177	-0.0791973
416	0.13069	1.5708	2.35619	0.130319	-0.608928	-0.0793546
417	0.131004	1.5708	2.35619	0.13063	-0.608678	-0.0795117
418	0.131319	1.5708	2.35619	0.130941	-0.608429	-0.0796686
419	0.131633	1.5708	2.35619	0.131253	-0.60818	-0.0798254
420	0.131947	1.5708	2.35619	0.131564	-0.60793	-0.079982
421	0.132261	1.5708	2.35619	0.131876	-0.607681	-0.0801384
422	0.132575	1.5708	2.35619	0.132187	-0.607431	-0.0802946
423	0.132889	1.5708	2.35619	0.132499	-0.607182	-0.0804507
424	0.133204	1.5708	2.35619	0.13281	-0.606932	-0.0806066
425	0.133518	1.5708	2.35619	0.133121	-0.606682	-0.0807624
426	0.133832	1.5708	2.35619	0.133433	-0.606433	-0.0809179
427	0.134146	1.5708	2.35619	0.133744	-0.606183	-0.0810733
428	0.13446	1.5708	2.35619	0.134055	-0.605933	-0.0812286
429	0.134774	1.5708	2.35619	0.134367	-0.605683	-0.0813836
430	0.135088	1.5708	2.35619	0.134678	-0.605433	-0.0815385
431	0.135403	1.5708	2.35619	0.134989	-0.605183	-0.0816932
432	0.135717	1.5708	2.35619	0.135301	-0.604933	-0.0818477
433	0.136031	1.5708	2.35619	0.135612	-0.604683	-0.0820021
434	0.136345	1.5708	2.35619	0.135923	-0.604432	-0.0821563
435	0.136659	1.5708	2.35619	0.136234	-0.604182	-0.0823103
436	0.136973	1.5708	2.35619	0.136546	-0.603932	-0.0824642
437	0.137288	1.5708	2.35619	0.136857	-0.603681	-0.0826178
438	0.137602	1.5708	2.35619	0.137168	-0.603431	-0.0827713
439	0.137916	1.5708	2.35619	0.137479	-0.60318	-0.0829247
440	0.13823	1.5708	2.35619	0.13779	-0.60293	-0.0830778
441	0.138544	1.5708	2.35619	0.138101	-0.602679	-0.0832308
442	0.138858	1.5708	2.35619	0.138413	-0.602428	-0.0833836
443	0.139173	1.5708	2.35619	0.138724	-0.602177	-0.0835363
444	0.139487	1.5708	2.35619	0.139035	-0.601927	-0.0836888
445	0.139801	1.5708	2.35619	0.139346	-0.601676	-0.0838411
446	0.140115	1.5708	2.35619	0.139657	-0.601425	-0.0839932
447	0.140429	1.5708	2.35619	0.139968	-0.601174	-0.0841451
448	0.140743	1.5708	2.35619	0.140279	-0.600923	-0.0842969
449	0.141058	1.5708	2.35619	0.14059	-0.600671	-0.0844485
450	0.141372	1.5708	2.35619	0.140901	-0.60042	-0.0845999
451	0.141686	1.5708	2.35619	0.141212	-0.600169	-0.0847512
452	0.142	1.5708	2.35619	0.141523	-0.599918	-0.0849023
453	0.142314	1.5708	2.35619	0.141834	-0.599666	-0.0850532
454	0.142628	1.5708	2.35619	0.142145	-0.599415	-0.085204
455	0.142942	1.5708	2.35619	0.142456	-0.599163	-0.0853545
456	0.143257	1.5708	2.35619	0.142767	-0.598912	-0.0855049
457	0.143571	1.5708	2.35619	0.143078	-0.59866	-0.0856551
458	0.143885	1.5708	2.35619	0.143389	-0.598409	-0.0858052
459	0.144199	1.5708	2.35619	0.1437	-0.598157	-0.0859551
460	0.144513	1.5708	2.35619	0.144011	-0.597905	-0.0861048
461	0.144827	1.5708	2.35619	0.144322	-0.597653	-0.0862543
462	0.145142	1.5708	2.35619	0.144633	-0.597401	-0.0864036
463	0.145456	1.5708	2.35619	0.144943	-0.597149	-0.0865528
464	0.14577	1.5708	2.35619	0.145254	-0.596897	-0.0867018
465	0.146084	1.5708	2.35619	0.145565	-0.596645	-0.0868507
466	0.146398	1.5708	2.35619	0.145876	-0.596393	-0.0869993
467	0.146712	1.5708	2.35619	0.146187	-0.596141	-0.0871478
468	0.147027	1.5708	2.35619	0.146497	-0.595889	-0.0872961
469	0.147341	1.5708	2.35619	0.146808	-0.595636	-0.0874443
470	0.147655	1.5708	2.35619	0.147119	-0.595384	-0.0875922
471	0.147969	1.5708	2.35619	0.14743	-0.595131	-0.08774
472	0.148283	1.5708	2.35619	0.14774	-0.594879	-0.0878876
473	0.148597	1.5708	2.35619	0.148051	-0.594626	-0.0880351
474	0.148911	1.5708	2.35619	0.148362	-0.594374	-0.0881823
475	0.149226	1.5708	2.35619	0.148672	-0.594121	-0.0883294
476	0.14954	1.5708	2.35619	0.148983	-0.593868	-0.0884763
477	0.149854	1.5708	2.35619	0.149294	-0.593616	-0.0886231
478	0.150168	1.5708	2.35619	0.149604	-0.593363	-0.0887697
479	0.150482	1.5708	2.35619	0.149915	-0.59311	-0.088916
480	0.150796	1.5708	2.35619	0.150226	-0.592857	-0.0890623
481	0.151111	1.5708	2.35619	0.150536	-0.592604	-0.0892083
482	0.151425	1.5708	2.35619	0.150847	-0.592351	-0.0893542
483	0.151739	1.5708	2.35619	0.151157	-0.592098	-0.0894999
484	0.152053	1.5708	2.35619	0.151468	-0.591844	-0.0896454
485	0.152367	1.5708	2.35619	0.151778	-0.591591	-0.0897907
486	0.152681	1.5708	2.35619	0.152089	-0.591338	-0.0899359
487	0.152996	1.5708	2.35619	0.152399	-0.591084	-0.0900809
488	0.15331	1.5708	2.35619	0.15271	-0.590831	-0.0902257
489	0.153624	1.5708	2.35619	0.15302	-0.590577	-0.0903704
490	0.153938	1.5708	2.35619	0.153331	-0.590324	-0.0905148
491	0.154252	1.5708	2.35619	0.153641	-0.59007	-0.0906591
492	0.154566	1.5708	2.35619	0.153952	-0.589817	-0.0908032
493	0.154881	1.5708	2.35619	0.154262	-0.589563	-0.0909472
494	0.155195	1.5708	2.35619	0.154572	-0.589309	-0.091091
495	0.155509	1.5708	2.35619	0.154883	-0.589055	-0.0912345
496	0.155823	1.5708	2.35619	0.155193	-0.588801	-0.091378
497	0.156137	1.5708	2.35619	0.155504	-0.588547	-0.0915212
498	0.156451	1.5708	2.35619	0.155814	-0.588293	-0.0916643
499	0.156765	1.5708	2.35619	0.156124	-0.588039	-0.0918072
500	0.15708	1.5708	2.35619	0.156434	-0.587785	-0.0919499
501	0.157394	1.5708	2.35619	0.156745	-0.587531	-0.0920924
502	0.157708	1.5708	2.35619	0.157055	-0.587277	-0.0922348
503	0.158022	1.5708	2.35619	0.157365	-0.587023	-0.092377
504	0.158336	1.5708	2.35619	0.157676	-0.586768	-0.092519
505	0.15865	1.5708	2.35619	0.157986	-0.586514	-0.0926608
506	0.158965	1.5708	2.35619	0.158296	-0.586259	-0.0928025
507	0.159279	1.5708	2.35619	0.158606	-0.586005	-0.0929439
508	0.159593	1.5708	2.35619	0.158916	-0.58575	-0.0930852
509	0.159907	1.5708	2.35619	0.159226	-0.585495	-0.0932264
510	0.160221	1.5708	2.35619	0.159537	-0.585241	-0.0933673
511	0.160535	1.5708	2.35619	0.159847	-0.584986	-0.0935081
512	0.16085	1.5708	2.35619	0.160157	-0.584731	-0.0936487
513	0.161164	1.5708	2.35619	0.160467	-0.584476	-0.0937891
514	0.161478	1.5708	2.35619	0.160777	-0.584221	-0.0939294
515	0.161792	1.5708	2.35619	0.161087	-0.583966	-0.0940694
516	0.162106	1.5708	2.35619	0.161397	-0.583711	-0.0942093
517	0.16242	1.5708	2.35619	0.161707	-0.583456	-0.094349
518	0.162734	1.5708	2.35619	0.162017	-0.583201	-0.0944886
519	0.163049	1.5708	2.35619	0.162327	-0.582946	-0.0946279
520	0.163363	1.5708	2.35619	0.162637	-0.58269	-0.0947671
521	0.163677	1.5708	2.35619	0.162947	-0.582435	-0.0949061
522	0.163991	1.5708	2.35619	0.163257	-0.58218	-0.095045
523	0.164305	1.5708	2.35619	0.163567	-0.581924	-0.0951836
524	0.164619	1.5708	2.35619	0.163877	-0.581669	-0.0953221
525	0.164934	1.5708	2.35619	0.164187	-0.581413	-0.0954604
526	0.165248	1.5708	2.35619	0.164497	-0.581158	-0.0955985
527	0.165562	1.5708	2.35619	0.164807	-0.580902	-0.0957365
528	0.165876	1.5708	2.35619	0.165116	-0.580646	-0.0958742
529	0.16619	1.5708	2.35619	0.165426	-0.58039	-0.0960118
530	0.166504	1.5708	2.35619	0.165736	-0.580134	-0.0961492
531	0.166819	1.5708	2.35619	0.166046	-0.579879	-0.0962865
532	0.167133	1.5708	2.35619	0.166356	-0.579623	-0.0964235
533	0.167447	1.5708	2.35619	0.166665	-0.579367	-0.0965604
534	0.167761	1.5708	2.35619	0.166975	-0.57911	-0.0966971
535	0.168075	1.5708	2.35619	0.167285	-0.578854	-0.0968336
536	0.168389	1.5708	2.35619	0.167595	-0.578598	-0.09697
537	0.168704	1.5708	2.35619	0.167904	-0.578342	-0.0971062
538	0.169018	1.5708	2.35619	0.168214	-0.578086	-0.0972421
539	0.169332	1.5708	2.35619	0.168524	-0.577829	-0.097378
540	0.169646	1.5708	2.35619	0.168833	-0.577573	-0.0975136
541	0.16996	1.5708	2.35619	0.169143	-0.577316	-0.097649
542	0.170274	1.5708	2.35619	0.169453	-0.57706	-0.0977843
543	0.170588	1.5708	2.35619	0.169762	-0.576803	-0.0979194
544	0.170903	1.5708	2.35619	0.170072	-0.576546	-0.0980543
545	0.171217	1.5708	2.35619	0.170381	-0.57629	-0.0981891
546	0.171531	1.5708	2.35619	0.170691	-0.576033	-0.0983237
547	0.171845	1.5708	2.35619	0.171001	-0.575776	-0.098458
548	0.172159	1.5708	2.35619	0.17131	-0.575519	-0.0985923
549	0.172473	1.5708	2.35619	0.17162	-0.575262	-0.0987263
550	0.172788	1.5708	2.35619	0.171929	-0.575005	-0.0988601
551	0.173102	1.5708	2.35619	0.172239	-0.574748	-0.0989938
552	0.173416	1.5708	2.35619	0.172548	-0.574491	-0.0991273
553	0.17373	1.5708	2.35619	0.172857	-0.574234	-0.0992606
554	0.174044	1.5708	2.35619	0.173167	-0.573977	-0.0993938
555	0.174358	1.5708	2.35619	0.173476	-0.573719	-0.0995267
556	0.174673	1.5708	2.35619	0.173786	-0.573462	-0.0996595
557	0.174987	1.5708	2.35619	0.174095	-0.573205	-0.0997921
558	0.175301	1.5708	2.35619	0.174404	-0.572947	-0.0999245
559	0.175615	1.5708	2.35619	0.174714	-0.57269	-0.100057
560	0.175929	1.5708	2.35619	0.175023	-0.572432	-0.100189
561	0.176243	1.5708	2.35619	0.175332	-0.572175	-0.100321
562	0.176558	1.5708	2.35619	0.175642	-0.571917	-0.100452
563	0.176872	1.5708	2.35619	0.175951	-0.571659	-0.100584
564	0.177186	1.5708	2.35619	0.17626	-0.571401	-0.100715
565	0.1775	1.5708	2.35619	0.176569	-0.571143	-0.100846
566	0.177814	1.5708	2.35619	0.176879	-0.570886	-0.100977
567	0.178128	1.5708	2.35619	0.177188	-0.570628	-0.101108
568	0.178442	1.5708	2.35619	0.177497	-0.57037	-0.101239
569	0.178757	1.5708	2.35619	0.177806	-0.570111	-0.101369
570	0.179071	1.5708	2.35619	0.178115	-0.569853	-0.1015
571	0.179385	1.5708	2.35619	0.178424	-0.569595	-0.10163
572	0.179699	1.5708	2.35619	0.178734	-0.569337	-0.10176
573	0.180013	1.5708	2.35619	0.179043	-0.569079	-0.101889
574	0.180327	1.5708	2.35619	0.179352	-0.56882	-0.102019
575	0.180642	1.5708	2.35619	0.179661	-0.568562	-0.102148
576	0.180956	1.5708	2.35619	0.17997	-0.568303	-0.102277
577	0.18127	1.5708	2.35619	0.180279	-0.568045	-0.102406
578	0.181584	1.5708	2.35619	0.180588	-0.567786	-0.102535
579	0.181898	1.5708	2.35619	0.180897	-0.567528	-0.102664
580	0.182212	1.5708	2.35619	0.181206	-0.567269	-0.102792
581	0.182527	1.5708	2.35619	0.181515	-0.56701	-0.102921
582	0.182841	1.5708	2.35619	0.181824	-0.566751	-0.103049
583	0.183155	1.5708	2.35619	0.182133	-0.566493	-0.103177
584	0.183469	1.5708	2.35619	0.182441	-0.566234	-0.103304
585	0.183783	1.5708	2.35619	0.18275	-0.565975	-0.103432
586	0.184097	1.5708	2.35619	0.183059	-0.565716	-0.103559
587	0.184411	1.5708	2.35619	0.183368	-0.565457	-0.103687
588	0.184726	1.5708	2.35619	0.183677	-0.565197	-0.103814
589	0.18504	1.5708	2.35619	0.183986	-0.564938	-0.103941
590	0.185354	1.5708	2.35619	0.184294	-0.564679	-0.104067
591	0.185668	1.5708	2.35619	0.184603	-0.56442	-0.104194
592	0.185982	1.5708	2.35619	0.184912	-0.56416	-0.10432
593	0.186296	1.5708	2.35619	0.185221	-0.563901	-0.104446
594	0.186611	1.5708	2.35619	0.185529	-0.563641	-0.104572
595	0.186925	1.5708	2.35619	0.185838	-0.563382	-0.104698
596	0.187239	1.5708	2.35619	0.186147	-0.563122	-0.104823
597	0.187553	1.5708	2.35619	0.186455	-0.562863	-0.104949
598	0.187867	1.5708	2.35619	0.186764	-0.562603	-0.105074
599	0.188181	1.5708	2.35619	0.187073	-0.562343	-0.105199
600	0.188496	1.5708	2.35619	0.187381	-0.562083	-0.105324
601	0.18881	1.5708	2.35619	0.18769	-0.561824	-0.105449
602	0.189124	1.5708	2.35619	0.187998	-0.561564	-0.105573
603	0.189438	1.5708	2.35619	0.188307	-0.561304	-0.105697
604	0.189752	1.5708	2.35619	0.188616	-0.561044	-0.105822
605	0.190066	1.5708	2.35619	0.188924	-0.560784	-0.105945
606	0.190381	1.5708	2.35619	0.189233	-0.560523	-0.106069
607	0.190695	1.5708	2.35619	0.189541	-0.560263	-0.106193
608	0.191009	1.5708	2.35619	0.189849	-0.560003	-0.106316
609	0.191323	1.5708	2.35619	0.190158	-0.559743	-0.106439
610	0.191637	1.5708	2.35619	0.190466	-0.559482	-0.106563
611	0.191951	1.5708	2.35619	0.190775	-0.559222	-0.106685
612	0.192265	1.5708	2.35619	0.191083	-0.558961	-0.106808
613	0.19258	1.5708	2.35619	0.191391	-0.558701	-0.106931
614	0.192894	1.5708	2.35619	0.1917	-0.55844	-0.107053
615	0.193208	1.5708	2.35619	0.192008	-0.55818	-0.107175
616	0.193522	1.5708	2.35619	0.192316	-0.557919	-0.107297
617	0.193836	1.5708	2.35619	0.192625	-0.557658	-0.107419
618	0.19415	1.5708	2.35619	0.192933	-0.557397	-0.10754
619	0.194465	1.5708	2.35619	0.193241	-0.557137	-0.107662
620	0.194779	1.5708	2.35619	0.193549	-0.556876	-0.107783
621	0.195093	1.5708	2.35619	0.193858	-0.556615	-0.107904
622	0.195407	1.5708	2.35619	0.194166	-0.556354	-0.108025
623	0.195721	1.5708	2.35619	0.194474	-0.556093	-0.108146
624	0.196035	1.5708	2.35619	0.194782	-0.555831	-0.108266
625	0.19635	1.5708	2.35619	0.19509	-0.55557	-0.108386
626	0.196664	1.5708	2.35619	0.195398	-0.555309	-0.108507
627	0.196978	1.5708	2.35619	0.195707	-0.555048	-0.108626
628	0.197292	1.5708	2.35619	0.196015	-0.554786	-0.108746
629	0.197606	1.5708	2.35619	0.196323	-0.554525	-0.108866
630	0.19792	1.5708	2.35619	0.196631	-0.554263	-0.108985
631	0.198234	1.5708	2.35619	0.196939	-0.554002	-0.109104
632	0.198549	1.5708	2.35619	0.197247	-0.55374	-0.109223
633	0.198863	1.5708	2.35619	0.197555	-0.553479	-0.109342
634	0.199177	1.5708	2.35619	0.197863	-0.553217	-0.109461
635	0.199491	1.5708	2.35619	0.198171	-0.552955	-0.109579
636	0.199805	1.5708	2.35619	0.198479	-0.552694	-0.109698
637	0.200119	1.5708	2.35619	0.198786	-0.552432	-0.109816
638	0.200434	1.5708	2.35619	0.199094	-0.55217	-0.109934
639	0.200748	1.5708	2.35619	0.199402	-0.551908	-0.110052
640	0.201062	1.5708	2.35619	0.19971	-0.551646	-0.110169
641	0.201376	1.5708	2.35619	0.200018	-0.551384	-0.110287
642	0.20169	1.5708	2.35619	0.200326	-0.551122	-0.110404
643	0.202004	1.5708	2.35619	0.200633	-0.55086	-0.110521
644	0.202319	1.5708	2.35619	0.200941	-0.550597	-0.110638
645	0.202633	1.5708	2.35619	0.201249	-0.550335	-0.110754
646	0.202947	1.5708	2.35619	0.201557	-0.550073	-0.110871
647	0.203261	1.5708	2.35619	0.201864	-0.54981	-0.110987
648	0.203575	1.5708	2.35619	0.202172	-0.549548	-0.111103
649	0.203889	1.5708	2.35619	0.20248	-0.549285	-0.111219
650	0.204204	1.5708	2.35619	0.202787	-0.549023	-0.111335
651	0.204518	1.5708	2.35619	0.203095	-0.54876	-0.11145
652	0.204832	1.5708	2.35619	0.203403	-0.548498	-0.111566
653	0.205146	1.5708	2.35619	0.20371	-0.548235	-0.111681
654	0.20546	1.5708	2.35619	0.204018	-0.547972	-0.111796
655	0.205774	1.5708	2.35619	0.204325	-0.547709	-0.111911
656	0.206088	1.5708	2.35619	0.204633	-0.547446	-0.112025
657	0.206403	1.5708	2.35619	0.20494	-0.547183	-0.11214
658	0.206717	1.5708	2.35619	0.205248	-0.54692	-0.112254
659	0.207031	1.5708	2.35619	0.205555	-0.546657	-0.112368
660	0.207345	1.5708	2.35619	0.205863	-0.546394	-0.112482
661	0.207659	1.5708	2.35619	0.20617	-0.546131	-0.112596
662	0.207973	1.5708	2.35619	0.206477	-0.545868	-0.112709
663	0.208288	1.5708	2.35619	0.206785	-0.545605	-0.112823
664	0.208602	1.5708	2.35619	0.207092	-0.545341	-0.112936
665	0.208916	1.5708	2.35619	0.2074	-0.545078	-0.113049
666	0.20923	1.5708	2.35619	0.207707	-0.544815	-0.113162
667	0.209544	1.5708	2.35619	0.208014	-0.544551	-0.113274
668	0.209858	1.5708	2.35619	0.208321	-0.544288	-0.113387
669	0.210173	1.5708	2.35619	0.208629	-0.544024	-0.113499
670	0.210487	1.5708	2.35619	0.208936	-0.54376	-0.113611
671	0.210801	1.5708	2.35619	0.209243	-0.543497	-0.113723
672	0.211115	1.5708	2.35619	0.20955	-0.543233	-0.113835
673	0.211429	1.5708	2.35619	0.209857	-0.542969	-0.113946
674	0.211743	1.5708	2.35619	0.210165	-0.542705	-0.114057
675	0.212058	1.5708	2.35619	0.210472	-0.542442	-0.114169
676	0.212372	1.5708	2.35619	0.210779	-0.542178	-0.11428
677	0.212686	1.5708	2.35619	0.211086	-0.541914	-0.11439
678	0.213	1.5708	2.35619	0.211393	-0.54165	-0.114501
679	0.213314	1.5708	2.35619	0.2117	-0.541385	-0.114611
680	0.213628	1.5708	2.35619	0.212007	-0.541121	-0.114722
681	0.213942	1.5708	2.35619	0.212314	-0.540857	-0.114832
682	0.214257	1.5708	2.35619	0.212621	-0.540593	-0.114941
683	0.214571	1.5708	2.35619	0.212928	-0.540328	-0.115051
684	0.214885	1.5708	2.35619	0.213235	-0.540064	-0.115161
685	0.215199	1.5708	2.35619	0.213542	-0.5398	-0.11527
686	0.215513	1.5708	2.35619	0.213849	-0.539535	-0.115379
687	0.215827	1.5708	2.35619	0.214156	-0.539271	-0.115488
688	0.216142	1.5708	2.35619	0.214463	-0.539006	-0.115597
689	0.216456	1.5708	2.35619	0.214769	-0.538741	-0.115705
690	0.21677	1.5708	2.35619	0.215076	-0.538477	-0.115814
691	0.217084	1.5708	2.35619	0.215383	-0.538212	-0.115922
692	0.217398	1.5708	2.35619	0.21569	-0.537947	-0.11603
693	0.217712	1.5708	2.35619	0.215997	-0.537682	-0.116138
694	0.218027	1.5708	2.35619	0.216303	-0.537417	-0.116245
695	0.218341	1.5708	2.35619	0.21661	-0.537152	-0.116353
696	0.218655	1.5708	2.35619	0.216917	-0.536887	-0.11646
697	0.218969	1.5708	2.35619	0.217223	-0.536622	-0.116567
698	0.219283	1.5708	2.35619	0.21753	-0.536357	-0.116674
699	0.219597	1.5708	2.35619	0.217837	-0.536092	-0.11678
700	0.219911	1.5708	2.35619	0.218143	-0.535827	-0.116887
701	0.220226	1.5708	2.35619	0.21845	-0.535562	-0.116993
702	0.22054	1.5708	2.35619	0.218756	-0.535296	-0.117099
703	0.220854	1.5708	2.35619	0.219063	-0.535031	-0.117205
704	0.221168	1.5708	2.35619	0.219369	-0.534765	-0.117311
705	0.221482	1.5708	2.35619	0.219676	-0.5345	-0.117417
706	0.221796	1.5708	2.35619	0.219982	-0.534234	-0.117522
707	0.222111	1.5708	2.35619	0.220289	-0.533969	-0.117627
708	0.222425	1.5708	2.35619	0.220595	-0.533703	-0.117732
709	0.222739	1.5708	2.35619	0.220902	-0.533437	-0.117837
710	0.223053	1.5708	2.35619	0.221208	-0.533172	-0.117942
711	0.223367	1.5708	2.35619	0.221514	-0.532906	-0.118046
712	0.223681	1.5708	2.35619	0.221821	-0.53264	-0.118151
713	0.223996	1.5708	2.35619	0.222127	-0.532374	-0.118255
714	0.22431	1.5708	2.35619	0.222433	-0.532108	-0.118359
715	0.224624	1.5708	2.35619	0.22274	-0.531842	-0.118462
716	0.224938	1.5708	2.35619	0.223046	-0.531576	-0.118566
717	0.225252	1.5708	2.35619	0.223352	-0.53131	-0.118669
718	0.225566	1.5708	2.35619	0.223658	-0.531044	-0.118772
719	0.225881	1.5708	2.35619	0.223965	-0.530777	-0.118875
720	0.226195	1.5708	2.35619	0.224271	-0.530511	-0.118978
721	0.226509	1.5708	2.35619	0.224577	-0.530245	-0.119081
722	0.226823	1.5708	2.35619	0.224883	-0.529978	-0.119183
723	0.227137	1.5708	2.35619	0.225189	-0.529712	-0.119285
724	0.227451	1.5708	2.35619	0.225495	-0.529446	-0.119387
725	0.227765	1.5708	2.35619	0.225801	-0.529179	-0.119489
726	0.22808	1.5708	2.35619	0.226107	-0.528912	-0.119591
727	0.228394	1.5708	2.35619	0.226413	-0.528646	-0.119692
728	0.228708	1.5708	2.35619	0.226719	-0.528379	-0.119794
729	0.229022	1.5708	2.35619	0.227025	-0.528112	-0.119895
730	0.229336	1.5708	2.35619	0.227331	-0.527846	-0.119996
731	0.22965	1.5708	2.35619	0.227637	-0.527579	-0.120096
732	0.229965	1.5708	2.35619	0.227943	-0.527312	-0.120197
733	0.230279	1.5708	2.35619	0.228249	-0.527045	-0.120297
734	0.230593	1.5708	2.35619	0.228555	-0.526778	-0.120398
735	0.230907	1.5708	2.35619	0.228861	-0.526511	-0.120498
736	0.231221	1.5708	2.35619	0.229166	-0.526244	-0.120597
737	0.231535	1.5708	2.35619	0.229472	-0.525976	-0.120697
738	0.23185	1.5708	2.35619	0.229778	-0.525709	-0.120796
739	0.232164	1.5708	2.35619	0.230084	-0.525442	-0.120896
740	0.232478	1.5708	2.35619	0.230389	-0.525175	-0.120995
741	0.232792	1.5708	2.35619	0.230695	-0.524907	-0.121094
742	0.233106	1.5708	2.35619	0.231001	-0.52464	-0.121192
743	0.23342	1.5708	2.35619	0.231306	-0.524372	-0.121291
744	0.233734	1.5708	2.35619	0.231612	-0.524105	-0.121389
745	0.234049	1.5708	2.35619	0.231918	-0.523837	-0.121487
746	0.234363	1.5708	2.35619	0.232223	-0.52357	-0.121585
747	0.234677	1.5708	2.35619	0.232529	-0.523302	-0.121683
748	0.234991	1.5708	2.35619	0.232834	-0.523034	-0.12178
749	0.235305	1.5708	2.35619	0.23314	-0.522766	-0.121878
750	0.235619	1.5708	2.35619	0.233445	-0.522499	-0.121975
751	0.235934	1.5708	2.35619	0.233751	-0.522231	-0.122072
752	0.236248	1.5708	2.35619	0.234056	-0.521963	-0.122169
753	0.236562	1.5708	2.35619	0.234362	-0.521695	-0.122265
754	0.236876	1.5708	2.35619	0.234667	-0.521427	-0.122362
755	0.23719	1.5708	2.35619	0.234972	-0.521159	-0.122458
756	0.237504	1.5708	2.35619	0.235278	-0.52089	-0.122554
757	0.237819	1.5708	2.35619	0.235583	-0.520622	-0.12265
758	0.238133	1.5708	2.35619	0.235888	-0.520354	-0.122746
759	0.238447	1.5708	2.35619	0.236194	-0.520086	-0.122841
760	0.238761	1.5708	2.35619	0.236499	-0.519817	-0.122936
761	0.239075	1.5708	2.35619	0.236804	-0.519549	-0.123031
762	0.239389	1.5708	2.35619	0.237109	-0.51928	-0.123126
763	0.239704	1.5708	2.35619	0.237415	-0.519012	-0.123221
764	0.240018	1.5708	2.35619	0.23772	-0.518743	-0.123316
765	0.240332	1.5708	2.35619	0.238025	-0.518475	-0.12341
766	0.240646	1.5708	2.35619	0.23833	-0.518206	-0.123504
767	0.24096	1.5708	2.35619	0.238635	-0.517937	-0.123598
768	0.241274	1.5708	2.35619	0.23894	-0.517669	-0.123692
769	0.241588	1.5708	2.35619	0.239245	-0.5174	-0.123785
770	0.241903	1.5708	2.35619	0.23955	-0.517131	-0.123879
771	0.242217	1.5708	2.35619	0.239855	-0.516862	-0.123972
772	0.242531	1.5708	2.35619	0.24016	-0.516593	-0.124065
773	0.242845	1.5708	2.35619	0.240465	-0.516324	-0.124158
774	0.243159	1.5708	2.35619	0.24077	-0.516055	-0.124251
775	0.243473	1.5708	2.35619	0.241075	-0.515786	-0.124343
776	0.243788	1.5708	2.35619	0.24138	-0.515517	-0.124435
777	0.244102	1.5708	2.35619	0.241685	-0.515248	-0.124527
778	0.244416	1.5708	2.35619	0.24199	-0.514978	-0.124619
779	0.24473	1.5708	2.35619	0.242294	-0.514709	-0.124711
780	0.245044	1.5708	2.35619	0.242599	-0.51444	-0.124803
781	0.245358	1.5708	2.35619	0.242904	-0.51417	-0.124894
782	0.245673	1.5708	2.35619	0.243209	-0.513901	-0.124985
783	0.245987	1.5708	2.35619	0.243513	-0.513631	-0.125076
784	0.246301	1.5708	2.35619	0.243818	-0.513362	-0.125167
785	0.246615	1.5708	2.35619	0.244123	-0.513092	-0.125257
786	0.246929	1.5708	2.35619	0.244427	-0.512822	-0.125348
787	0.247243	1.5708	2.35619	0.244732	-0.512552	-0.125438
788	0.247558	1.5708	2.35619	0.245037	-0.512283	-0.125528
789	0.247872	1.5708	2.35619	0.245341	-0.512013	-0.125618
790	0.248186	1.5708	2.35619	0.245646	-0.511743	-0.125708
791	0.2485	1.5708	2.35619	0.24595	-0.511473	-0.125797
792	0.248814	1.5708	2.35619	0.246255	-0.511203	-0.125886
793	0.249128	1.5708	2.35619	0.246559	-0.510933	-0.125975
794	0.249442	1.5708	2.35619	0.246864	-0.510663	-0.126064
795	0.249757	1.5708	2.35619	0.247168	-0.510393	-0.126153
796	0.250071	1.5708	2.35619	0.247473	-0.510123	-0.126241
797	0.250385	1.5708	2.35619	0.247777	-0.509852	-0.12633
798	0.250699	1.5708	2.35619	0.248081	-0.509582	-0.126418
799	0.251013	1.5708	2.35619	0.248386	-0.509312	-0.126506
800	0.251327	1.5708	2.35619	0.24869	-0.509041	-0.126593
801	0.251642	1.5708	2.35619	0.248994	-0.508771	-0.126681
802	0.251956	1.5708	2.35619	0.249298	-0.5085	-0.126768
803	0.25227	1.5708	2.35619	0.249603	-0.50823	-0.126856
804	0.252584	1.5708	2.35619	0.249907	-0.507959	-0.126943
805	0.252898	1.5708	2.35619	0.250211	-0.507689	-0.127029
806	0.253212	1.5708	2.35619	0.250515	-0.507418	-0.127116
807	0.253527	1.5708	2.35619	0.250819	-0.507147	-0.127202
808	0.253841	1.5708	2.35619	0.251123	-0.506877	-0.127289
809	0.254155	1.5708	2.35619	0.251427	-0.506606	-0.127375
810	0.254469	1.5708	2.35619	0.251732	-0.506335	-0.12746
811	0.254783	1.5708	2.35619	0.252036	-0.506064	-0.127546
812	0.255097	1.5708	2.35619	0.25234	-0.505793	-0.127632
813	0.255411	1.5708	2.35619	0.252644	-0.505522	-0.127717
814	0.255726	1.5708	2.35619	0.252948	-0.505251	-0.127802
815	0.25604	1.5708	2.35619	0.253251	-0.50498	-0.127887
816	0.256354	1.5708	2.35619	0.253555	-0.504708	-0.127972
817	0.256668	1.5708	2.35619	0.253859	-0.504437	-0.128056
818	0.256982	1.5708	2.35619	0.254163	-0.504166	-0.12814
819	0.257296	1.5708	2.35619	0.254467	-0.503895	-0.128225
820	0.257611	1.5708	2.35619	0.254771	-0.503623	-0.128308
821	0.257925	1.5708	2.35619	0.255075	-0.503352	-0.128392
822	0.258239	1.5708	2.35619	0.255378	-0.50308	-0.128476
823	0.258553	1.5708	2.35619	0.255682	-0.502809	-0.128559
824	0.258867	1.5708	2.35619	0.255986	-0.502537	-0.128642
825	0.259181	1.5708	2.35619	0.256289	-0.502266	-0.128725
826	0.259496	1.5708	2.35619	0.256593	-0.501994	-0.128808
827	0.25981	1.5708	2.35619	0.256897	-0.501722	-0.128891
828	0.260124	1.5708	2.35619	0.2572	-0.50145	-0.128973
829	0.260438	1.5708	2.35619	0.257504	-0.501179	-0.129055
830	0.260752	1.5708	2.35619	0.257807	-0.500907	-0.129137
831	0.261066	1.5708	2.35619	0.258111	-0.500635	-0.129219
832	0.261381	1.5708	2.35619	0.258414	-0.500363	-0.129301
833	0.261695	1.5708	2.35619	0.258718	-0.500091	-0.129382
834	0.262009	1.5708	2.35619	0.259021	-0.499819	-0.129464
835	0.262323	1.5708	2.35619	0.259325	-0.499546	-0.129545
836	0.262637	1.5708	2.35619	0.259628	-0.499274	-0.129626
837	0.262951	1.5708	2.35619	0.259932	-0.499002	-0.129706
838	0.263265	1.5708	2.35619	0.260235	-0.49873	-0.129787
839	0.26358	1.5708	2.35619	0.260538	-0.498457	-0.129867
840	0.263894	1.5708	2.35619	0.260842	-0.498185	-0.129947
841	0.264208	1.5708	2.35619	0.261145	-0.497913	-0.130027
842	0.264522	1.5708	2.35619	0.261448	-0.49764	-0.130107
843	0.264836	1.5708	2.35619	0.261751	-0.497368	-0.130187
844	0.26515	1.5708	2.35619	0.262054	-0.497095	-0.130266
845	0.265465	1.5708	2.35619	0.262358	-0.496822	-0.130345
846	0.265779	1.5708	2.35619	0.262661	-0.49655	-0.130424
847	0.266093	1.5708	2.35619	0.262964	-0.496277	-0.130503
848	0.266407	1.5708	2.35619	0.263267	-0.496004	-0.130582
849	0.266721	1.5708	2.35619	0.26357	-0.495732	-0.13066
850	0.267035	1.5708	2.35619	0.263873	-0.495459	-0.130738
851	0.26735	1.5708	2.35619	0.264176	-0.495186	-0.130816
852	0.267664	1.5708	2.35619	0.264479	-0.494913	-0.130894
853	0.267978	1.5708	2.35619	0.264782	-0.49464	-0.130972
854	0.268292	1.5708	2.35619	0.265085	-0.494367	-0.131049
855	0.268606	1.5708	2.35619	0.265388	-0.494094	-0.131126
856	0.26892	1.5708	2.35619	0.265691	-0.49382	-0.131204
857	0.269234	1.5708	2.35619	0.265994	-0.493547	-0.13128
858	0.269549	1.5708	2.35619	0.266296	-0.493274	-0.131357
859	0.269863	1.5708	2.35619	0.266599	-0.493001	-0.131434
860	0.270177	1.5708	2.35619	0.266902	-0.492727	-0.13151
861	0.270491	1.5708	2.35619	0.267205	-0.492454	-0.131586
862	0.270805	1.5708	2.35619	0.267507	-0.49218	-0.131662
863	0.271119	1.5708	2.35619	0.26781	-0.491907	-0.131738
864	0.271434	1.5708	2.35619	0.268113	-0.491633	-0.131813
865	0.271748	1.5708	2.35619	0.268415	-0.49136	-0.131889
866	0.272062	1.5708	2.35619	0.268718	-0.491086	-0.131964
867	0.272376	1.5708	2.35619	0.269021	-0.490813	-0.132039
868	0.27269	1.5708	2.35619	0.269323	-0.490539	-0.132113
869	0.273004	1.5708	2.35619	0.269626	-0.490265	-0.132188
870	0.273319	1.5708	2.35619	0.269928	-0.489991	-0.132262
871	0.273633	1.5708	2.35619	0.270231	-0.489717	-0.132337
872	0.273947	1.5708	2.35619	0.270533	-0.489443	-0.132411
873	0.274261	1.5708	2.35619	0.270836	-0.489169	-0.132485
874	0.274575	1.5708	2.35619	0.271138	-0.488895	-0.132558
875	0.274889	1.5708	2.35619	0.27144	-0.488621	-0.132632
876	0.275204	1.5708	2.35619	0.271743	-0.488347	-0.132705
877	0.275518	1.5708	2.35619	0.272045	-0.488073	-0.132778
878	0.275832	1.5708	2.35619	0.272347	-0.487799	-0.132851
879	0.276146	1.5708	2.35619	0.27265	-0.487524	-0.132923
880	0.27646	1.5708	2.35619	0.272952	-0.48725	-0.132996
881	0.276774	1.5708	2.35619	0.273254	-0.486976	-0.133068
882	0.277088	1.5708	2.35619	0.273556	-0.486701	-0.13314
883	0.277403	1.5708	2.35619	0.273859	-0.486427	-0.133212
884	0.277717	1.5708	2.35619	0.274161	-0.486152	-0.133284
885	0.278031	1.5708	2.35619	0.274463	-0.485878	-0.133355
886	0.278345	1.5708	2.35619	0.274765	-0.485603	-0.133427
887	0.278659	1.5708	2.35619	0.275067	-0.485329	-0.133498
888	0.278973	1.5708	2.35619	0.275369	-0.485054	-0.133569
889	0.279288	1.5708	2.35619	0.275671	-0.484779	-0.133639
890	0.279602	1.5708	2.35619	0.275973	-0.484504	-0.13371
891	0.279916	1.5708	2.35619	0.276275	-0.484229	-0.13378
892	0.28023	1.5708	2.35619	0.276577	-0.483955	-0.133851
893	0.280544	1.5708	2.35619	0.276879	-0.48368	-0.133921
894	0.280858	1.5708	2.35619	0.277181	-0.483405	-0.13399
895	0.281173	1.5708	2.35619	0.277482	-0.48313	-0.13406
896	0.281487	1.5708	2.35619	0.277784	-0.482854	-0.134129
897	0.281801	1.5708	2.35619	0.278086	-0.482579	-0.134199
898	0.282115	1.5708	2.35619	0.278388	-0.482304	-0.134268
899	0.282429	1.5708	2.35619	0.278689	-0.482029	-0.134336
900	0.282743	1.5708	2.35619	0.278991	-0.481754	-0.134405
901	0.283057	1.5708	2.35619	0.279293	-0.481478	-0.134473
902	0.283372	1.5708	2.35619	0.279594	-0.481203	-0.134542
903	0.283686	1.5708	2.35619	0.279896	-0.480928	-0.13461
904	0.284	1.5708	2.35619	0.280198	-0.480652	-0.134678
905	0.284314	1.5708	2.35619	0.280499	-0.480377	-0.134745
906	0.284628	1.5708	2.35619	0.280801	-0.480101	-0.134813
907	0.284942	1.5708	2.35619	0.281102	-0.479825	-0.13488
908	0.285257	1.5708	2.35619	0.281404	-0.47955	-0.134947
909	0.285571	1.5708	2.35619	0.281705	-0.479274	-0.135014
910	0.285885	1.5708	2.35619	0.282007	-0.478998	-0.135081
911	0.286199	1.5708	2.35619	0.282308	-0.478723	-0.135147
912	0.286513	1.5708	2.35619	0.282609	-0.478447	-0.135213
913	0.286827	1.5708	2.35619	0.282911	-0.478171	-0.13528
914	0.287142	1.5708	2.35619	0.283212	-0.477895	-0.135346
915	0.287456	1.5708	2.35619	0.283513	-0.477619	-0.135411
916	0.28777	1.5708	2.35619	0.283815	-0.477343	-0.135477
917	0.288084	1.5708	2.35619	0.284116	-0.477067	-0.135542
918	0.288398	1.5708	2.35619	0.284417	-0.476791	-0.135607
919	0.288712	1.5708	2.35619	0.284718	-0.476514	-0.135672
920	0.289027	1.5708	2.35619	0.285019	-0.476238	-0.135737
921	0.289341	1.5708	2.35619	0.28532	-0.475962	-0.135802
922	0.289655	1.5708	2.35619	0.285621	-0.475686	-0.135866
923	0.289969	1.5708	2.35619	0.285923	-0.475409	-0.13593
924	0.290283	1.5708	2.35619	0.286224	-0.475133	-0.135994
925	0.290597	1.5708	2.35619	0.286525	-0.474856	-0.136058
926	0.290911	1.5708	2.35619	0.286826	-0.47458	-0.136122
927	0.291226	1.5708	2.35619	0.287126	-0.474303	-0.136185
928	0.29154	1.5708	2.35619	0.287427	-0.474027	-0.136248
929	0.291854	1.5708	2.35619	0.287728	-0.47375	-0.136311
930	0.292168	1.5708	2.35619	0.288029	-0.473473	-0.136374
931	0.292482	1.5708	2.35619	0.28833	-0.473197	-0.136437
932	0.292796	1.5708	2.35619	0.288631	-0.47292	-0.136499
933	0.293111	1.5708	2.35619	0.288932	-0.472643	-0.136561
934	0.293425	1.5708	2.35619	0.289232	-0.472366	-0.136624
935	0.293739	1.5708	2.35619	0.289533	-0.472089	-0.136685
936	0.294053	1.5708	2.35619	0.289834	-0.471812	-0.136747
937	0.294367	1.5708	2.35619	0.290134	-0.471535	-0.136809
938	0.294681	1.5708	2.35619	0.290435	-0.471258	-0.13687
939	0.294996	1.5708	2.35619	0.290736	-0.470981	-0.136931
940	0.29531	1.5708	2.35619	0.291036	-0.470704	-0.136992
941	0.295624	1.5708	2.35619	0.291337	-0.470427	-0.137053
942	0.295938	1.5708	2.35619	0.291637	-0.470149	-0.137113
943	0.296252	1.5708	2.35619	0.291938	-0.469872	-0.137173
944	0.296566	1.5708	2.35619	0.292238	-0.469595	-0.137234
945	0.296881	1.5708	2.35619	0.292539	-0.469317	-0.137293
946	0.297195	1.5708	2.35619	0.292839	-0.46904	-0.137353
947	0.297509	1.5708	2.35619	0.293139	-0.468763	-0.137413
948	0.297823	1.5708	2.35619	0.29344	-0.468485	-0.137472
949	0.298137	1.5708	2.35619	0.29374	-0.468207	-0.137531
950	0.298451	1.5708	2.35619	0.29404	-0.46793	-0.13759
951	0.298765	1.5708	2.35619	0.294341	-0.467652	-0.137649
952	0.29908	1.5708	2.35619	0.294641	-0.467374	-0.137708
953	0.299394	1.5708	2.35619	0.294941	-0.467097	-0.137766
954	0.299708	1.5708	2.35619	0.295241	-0.466819	-0.137824
955	0.300022	1.5708	2.35619	0.295541	-0.466541	-0.137882
956	0.300336	1.5708	2.35619	0.295841	-0.466263	-0.13794
957	0.30065	1.5708	2.35619	0.296142	-0.465985	-0.137998
958	0.300965	1.5708	2.35619	0.296442	-0.465707	-0.138055
959	0.301279	1.5708	2.35619	0.296742	-0.465429	-0.138112
960	0.301593	1.5708	2.35619	0.297042	-0.465151	-0.138169
961	0.301907	1.5708	2.35619	0.297342	-0.464873	-0.138226
962	0.302221	1.5708	2.35619	0.297641	-0.464595	-0.138283
963	0.302535	1.5708	2.35619	0.297941	-0.464317	-0.138339
964	0.30285	1.5708	2.35619	0.298241	-0.464038	-0.138395
965	0.303164	1.5708	2.35619	0.298541	-0.46376	-0.138451
966	0.303478	1.5708	2.35619	0.298841	-0.463482	-0.138507
967	0.303792	1.5708	2.35619	0.299141	-0.463203	-0.138563
968	0.304106	1.5708	2.35619	0.29944	-0.462925	-0.138618
969	0.30442	1.5708	2.35619	0.29974	-0.462646	-0.138674
970	0.304734	1.5708	2.35619	0.30004	-0.462368	-0.138729
971	0.305049	1.5708	2.35619	0.30034	-0.462089	-0.138784
972	0.305363	1.5708	2.35619	0.300639	-0.461811	-0.138838
973	0.305677	1.5708	2.35619	0.300939	-0.461532	-0.138893
974	0.305991	1.5708	2.35619	0.301238	-0.461253	-0.138947
975	0.306305	1.5708	2.35619	0.301538	-0.460974	-0.139001
976	0.306619	1.5708	2.35619	0.301837	-0.460696	-0.139055
977	0.306934	1.5708	2.35619	0.302137	-0.460417	-0.139109
978	0.307248	1.5708	2.35619	0.302436	-0.460138	-0.139162
979	0.307562	1.5708	2.35619	0.302736	-0.459859	-0.139216
980	0.307876	1.5708	2.35619	0.303035	-0.45958	-0.139269
981	0.30819	1.5708	2.35619	0.303335	-0.459301	-0.139322
982	0.308504	1.5708	2.35619	0.303634	-0.459022	-0.139375
983	0.308819	1.5708	2.35619	0.303933	-0.458743	-0.139427
984	0.309133	1.5708	2.35619	0.304233	-0.458463	-0.13948
985	0.309447	1.5708	2.35619	0.304532	-0.458184	-0.139532
986	0.309761	1.5708	2.35619	0.304831	-0.457905	-0.139584
987	0.310075	1.5708	2.35619	0.30513	-0.457626	-0.139635
988	0.310389	1.5708	2.35619	0.305429	-0.457346	-0.139687
989	0.310704	1.5708	2.35619	0.305729	-0.457067	-0.139738
990	0.311018	1.5708	2.35619	0.306028	-0.456787	-0.13979
991	0.311332	1.5708	2.35619	0.306327	-0.456508	-0.139841
992	0.311646	1.5708	2.35619	0.306626	-0.456228	-0.139891
993	0.31196	1.5708	2.35619	0.306925	-0.455949	-0.139942
994	0.312274	1.5708	2.35619	0.307224	-0.455669	-0.139992
995	0.312588	1.5708	2.35619	0.307523	-0.45539	-0.140043
996	0.312903	1.5708	2.35619	0.307822	-0.45511	-0.140093
997	0.313217	1.5708	2.35619	0.308121	-0.45483	-0.140142
998	0.313531	1.5708	2.35619	0.308419	-0.45455	-0.140192
999	0.313845	1.5708	2.35619	0.308718	-0.45427	-0.140242
1000	0.314159	1.5708	2.35619	0.309017	-0.45399	-0.140291
1001	0.314473	1.5708	2.35619	0.309316	-0.453711	-0.14034
1002	0.314788	1.5708	2.35619	0.309614	-0.453431	-0.140389
1003	0.315102	1.5708	2.35619	0.309913	-0.453151	-0.140437
1004	0.315416	1.5708	2.35619	0.310212	-0.45287	-0.140486
1005	0.31573	1.5708	2.35619	0.310511	-0.45259	-0.140534
1006	0.316044	1.5708	2.35619	0.310809	-0.45231	-0.140582
1007	0.316358	1.5708	2.35619	0.311108	-0.45203	-0.14063
1008	0.316673	1.5708	2.35619	0.311406	-0.45175	-0.140678
1009	0.316987	1.5708	2.35619	0.311705	-0.451469	-0.140725
1010	0.317301	1.5708	2.35619	0.312003	-0.451189	-0.140772
1011	0.317615	1.5708	2.35619	0.312302	-0.450909	-0.14082
1012	0.317929	1.5708	2.35619	0.3126	-0.450628	-0.140866
1013	0.318243	1.5708	2.35619	0.312899	-0.450348	-0.140913
1014	0.318557	1.5708	2.35619	0.313197	-0.450067	-0.14096
1015	0.318872	1.5708	2.35619	0.313495	-0.449787	-0.141006
1016	0.319186	1.5708	2.35619	0.313794	-0.449506	-0.141052
1017	0.3195	1.5708	2.35619	0.314092	-0.449225	-0.141098
1018	0.319814	1.5708	2.35619	0.31439	-0.448945	-0.141144
1019	0.320128	1.5708	2.35619	0.314688	-0.448664	-0.141189
1020	0.320442	1.5708	2.35619	0.314987	-0.448383	-0.141235
1021	0.320757	1.5708	2.35619	0.315285	-0.448102	-0.14128
1022	0.321071	1.5708	2.35619	0.315583	-0.447822	-0.141325
1023	0.321385	1.5708	2.35619	0.315881	-0.447541	-0.14137
1024	0.321699	1.5708	2.35619	0.316179	-0.44726	-0.141414
1025	0.322013	1.5708	2.35619	0.316477	-0.446979	-0.141458
1026	0.322327	1.5708	2.35619	0.316775	-0.446698	-0.141503
1027	0.322642	1.5708	2.35619	0.317073	-0.446416	-0.141547
1028	0.322956	1.5708	2.35619	0.317371	-0.446135	-0.14159
1029	0.32327	1.5708	2.35619	0.317669	-0.445854	-0.141634
1030	0.323584	1.5708	2.35619	0.317967	-0.445573	-0.141677
1031	0.323898	1.5708	2.35619	0.318264	-0.445292	-0.141721
1032	0.324212	1.5708	2.35619	0.318562	-0.44501	-0.141764
1033	0.324527	1.5708	2.35619	0.31886	-0.444729	-0.141806
1034	0.324841	1.5708	2.35619	0.319158	-0.444448	-0.141849
1035	0.325155	1.5708	2.35619	0.319456	-0.444166	-0.141891
1036	0.325469	1.5708	2.35619	0.319753	-0.443885	-0.141934
1037	0.325783	1.5708	2.35619	0.320051	-0.443603	-0.141976
1038	0.326097	1.5708	2.35619	0.320348	-0.443322	-0.142017
1039	0.326411	1.5708	2.35619	0.320646	-0.44304	-0.142059
1040	0.326726	1.5708	2.35619	0.320944	-0.442758	-0.1421
1041	0.32704	1.5708	2.35619	0.321241	-0.442477	-0.142142
1042	0.327354	1.5708	2.35619	0.321539	-0.442195	-0.142183
1043	0.327668	1.5708	2.35619	0.321836	-0.441913	-0.142224
1044	0.327982	1.5708	2.35619	0.322134	-0.441631	-0.142264
1045	0.328296	1.5708	2.35619	0.322431	-0.441349	-0.142305
1046	0.328611	1.5708	2.35619	0.322728	-0.441067	-0.142345
1047	0.328925	1.5708	2.35619	0.323026	-0.440785	-0.142385
1048	0.329239	1.5708	2.35619	0.323323	-0.440503	-0.142425
1049	0.329553	1.5708	2.35619	0.32362	-0.440221	-0.142464
1050	0.329867	1.5708	2.35619	0.323917	-0.439939	-0.142504
1051	0.330181	1.5708	2.35619	0.324215	-0.439657	-0.142543
1052	0.330496	1.5708	2.35619	0.324512	-0.439375	-0.142582
1053	0.33081	1.5708	2.35619	0.324809	-0.439093	-0.142621
1054	0.331124	1.5708	2.35619	0.325106	-0.43881	-0.14266
1055	0.331438	1.5708	2.35619	0.325403	-0.438528	-0.142698
1056	0.331752	1.5708	2.35619	0.3257	-0.438246	-0.142737
1057	0.332066	1.5708	2.35619	0.325997	-0.437963	-0.142775
1058	0.332381	1.5708	2.35619	0.326294	-0.437681	-0.142813
1059	0.332695	1.5708	2.35619	0.326591	-0.437398	-0.14285
1060	0.333009	1.5708	2.35619	0.326888	-0.437116	-0.142888
1061	0.333323	1.5708	2.35619	0.327185	-0.436833	-0.142925
1062	0.333637	1.5708	2.35619	0.327482	-0.436551	-0.142962
1063	0.333951	1.5708	2.35619	0.327779	-0.436268	-0.142999
1064	0.334265	1.5708	2.35619	0.328075	-0.435985	-0.143036
1065	0.33458	1.5708	2.35619	0.328372	-0.435702	-0.143073
1066	0.334894	1.5708	2.35619	0.328669	-0.43542	-0.143109
1067	0.335208	1.5708	2.35619	0.328966	-0.435137	-0.143145
1068	0.335522	1.5708	2.35619	0.329262	-0.434854	-0.143181
1069	0.335836	1.5708	2.35619	0.329559	-0.434571	-0.143217
1070	0.33615	1.5708	2.35619	0.329855	-0.434288	-0.143252
1071	0.336465	1.5708	2.35619	0.330152	-0.434005	-0.143288
1072	0.336779	1.5708	2.35619	0.330449	-0.433722	-0.143323
1073	0.337093	1.5708	2.35619	0.330745	-0.433439	-0.143358
1074	0.337407	1.5708	2.35619	0.331041	-0.433156	-0.143393
1075	0.337721	1.5708	2.35619	0.331338	-0.432873	-0.143427
1076	0.338035	1.5708	2.35619	0.331634	-0.432589	-0.143461
1077	0.33835	1.5708	2.35619	0.331931	-0.432306	-0.143496
1078	0.338664	1.5708	2.35619	0.332227	-0.432023	-0.14353
1079	0.338978	1.5708	2.35619	0.332523	-0.431739	-0.143563
1080	0.339292	1.5708	2.35619	0.33282	-0.431456	-0.143597
1081	0.339606	1.5708	2.35619	0.333116	-0.431173	-0.14363
1082	0.33992	1.5708	2.35619	0.333412	-0.430889	-0.143664
1083	0.340234	1.5708	2.35619	0.333708	-0.430606	-0.143697
1084	0.340549	1.5708	2.35619	0.334004	-0.430322	-0.143729
1085	0.340863	1.5708	2.35619	0.3343	-0.430038	-0.143762
1086	0.341177	1.5708	2.35619	0.334596	-0.429755	-0.143794
1087	0.341491	1.5708	2.35619	0.334892	-0.429471	-0.143827
1088	0.341805	1.5708	2.35619	0.335188	-0.429187	-0.143859
1089	0.342119	1.5708	2.35619	0.335484	-0.428904	-0.14389
1090	0.342434	1.5708	2.35619	0.33578	-0.42862	-0.143922
1091	0.342748	1.5708	2.35619	0.336076	-0.428336	-0.143954
1092	0.343062	1.5708	2.35619	0.336372	-0.428052	-0.143985
1093	0.343376	1.5708	2.35619	0.336668	-0.427768	-0.144016
1094	0.34369	1.5708	2.35619	0.336964	-0.427484	-0.144047
1095	0.344004	1.5708	2.35619	0.33726	-0.4272	-0.144077
1096	0.344319	1.5708	2.35619	0.337555	-0.426916	-0.144108
1097	0.344633	1.5708	2.35619	0.337851	-0.426632	-0.144138
1098	0.344947	1.5708	2.35619	0.338147	-0.426348	-0.144168
1099	0.345261	1.5708	2.35619	0.338442	-0.426064	-0.144198
1100	0.345575	1.5708	2.35619	0.338738	-0.425779	-0.144228
1101	0.345889	1.5708	2.35619	0.339033	-0.425495	-0.144257
1102	0.346204	1.5708	2.35619	0.339329	-0.425211	-0.144286
1103	0.346518	1.5708	2.35619	0.339625	-0.424926	-0.144315
1104	0.346832	1.5708	2.35619	0.33992	-0.424642	-0.144344
1105	0.347146	1.5708	2.35619	0.340215	-0.424357	-0.144373
1106	0.34746	1.5708	2.35619	0.340511	-0.424073	-0.144401
1107	0.347774	1.5708	2.35619	0.340806	-0.423788	-0.14443
1108	0.348088	1.5708	2.35619	0.341102	-0.423504	-0.144458
1109	0.348403	1.5708	2.35619	0.341397	-0.423219	-0.144486
1110	0.348717	1.5708	2.35619	0.341692	-0.422935	-0.144513
1111	0.349031	1.5708	2.35619	0.341987	-0.42265	-0.144541
1112	0.349345	1.5708	2.35619	0.342283	-0.422365	-0.144568
1113	0.349659	1.5708	2.35619	0.342578	-0.42208	-0.144595
1114	0.349973	1.5708	2.35619	0.342873	-0.421796	-0.144622
1115	0.350288	1.5708	2.35619	0.343168	-0.421511	-0.144649
1116	0.350602	1.5708	2.35619	0.343463	-0.421226	-0.144675
1117	0.350916	1.5708	2.35619	0.343758	-0.420941	-0.144702
1118	0.35123	1.5708	2.35619	0.344053	-0.420656	-0.144728
1119	0.351544	1.5708	2.35619	0.344348	-0.420371	-0.144754
1120	0.351858	1.5708	2.35619	0.344643	-0.420086	-0.14478
1121	0.352173	1.5708	2.35619	0.344938	-0.419801	-0.144805
1122	0.352487	1.5708	2.35619	0.345233	-0.419515	-0.14483
1123	0.352801	1.5708	2.35619	0.345528	-0.41923	-0.144856
1124	0.353115	1.5708	2.35619	0.345822	-0.418945	-0.144881
1125	0.353429	1.5708	2.35619	0.346117	-0.41866	-0.144905
1126	0.353743	1.5708	2.35619	0.346412	-0.418374	-0.14493
1127	0.354057	1.5708	2.35619	0.346706	-0.418089	-0.144954
1128	0.354372	1.5708	2.35619	0.347001	-0.417804	-0.144978
1129	0.354686	1.5708	2.35619	0.347296	-0.417518	-0.145002
1130	0.355	1.5708	2.35619	0.34759	-0.417233	-0.145026
1131	0.355314	1.5708	2.35619	0.347885	-0.416947	-0.14505
1132	0.355628	1.5708	2.35619	0.348179	-0.416662	-0.145073
1133	0.355942	1.5708	2.35619	0.348474	-0.416376	-0.145096
1134	0.356257	1.5708	2.35619	0.348768	-0.41609	-0.145119
1135	0.356571	1.5708	2.35619	0.349063	-0.415805	-0.145142
1136	0.356885	1.5708	2.35619	0.349357	-0.415519	-0.145165
1137	0.357199	1.5708	2.35619	0.349651	-0.415233	-0.145187
1138	0.357513	1.5708	2.35619	0.349946	-0.414947	-0.145209
1139	0.357827	1.5708	2.35619	0.35024	-0.414661	-0.145231
1140	0.358142	1.5708	2.35619	0.350534	-0.414376	-0.145253
1141	0.358456	1.5708	2.35619	0.350829	-0.41409	-0.145274
1142	0.35877	1.5708	2.35619	0.351123	-0.413804	-0.145296
1143	0.359084	1.5708	2.35619	0.351417	-0.413518	-0.145317
1144	0.359398	1.5708	2.35619	0.351711	-0.413232	-0.145338
1145	0.359712	1.5708	2.35619	0.352005	-0.412945	-0.145359
1146	0.360027	1.5708	2.35619	0.352299	-0.412659	-0.145379
1147	0.360341	1.5708	2.35619	0.352593	-0.412373	-0.1454
1148	0.360655	1.5708	2.35619	0.352887	-0.412087	-0.14542
1149	0.360969	1.5708	2.35619	0.353181	-0.411801	-0.14544
1150	0.361283	1.5708	2.35619	0.353475	-0.411514	-0.14546
1151	0.361597	1.5708	2.35619	0.353769	-0.411228	-0.14548
1152	0.361911	1.5708	2.35619	0.354063	-0.410942	-0.145499
1153	0.362226	1.5708	2.35619	0.354356	-0.410655	-0.145518
1154	0.36254	1.5708	2.35619	0.35465	-0.410369	-0.145537
1155	0.362854	1.5708	2.35619	0.354944	-0.410082	-0.145556
1156	0.363168	1.5708	2.35619	0.355237	-0.409796	-0.145575
1157	0.363482	1.5708	2.35619	0.355531	-0.409509	-0.145593
1158	0.363796	1.5708	2.35619	0.355825	-0.409222	-0.145611
1159	0.364111	1.5708	2.35619	0.356118	-0.408936	-0.14563
1160	0.364425	1.5708	2.35619	0.356412	-0.408649	-0.145647
1161	0.364739	1.5708	2.35619	0.356705	-0.408362	-0.145665
1162	0.365053	1.5708	2.35619	0.356999	-0.408076	-0.145683
1163	0.365367	1.5708	2.35619	0.357292	-0.407789	-0.1457
1164	0.365681	1.5708	2.35619	0.357586	-0.407502	-0.145717
1165	0.365996	1.5708	2.35619	0.357879	-0.407215	-0.145734
1166	0.36631	1.5708	2.35619	0.358172	-0.406928	-0.14575
1167	0.366624	1.5708	2.35619	0.358466	-0.406641	-0.145767
1168	0.366938	1.5708	2.35619	0.358759	-0.406354	-0.145783
1169	0.367252	1.5708	2.35619	0.359052	-0.406067	-0.145799
1170	0.367566	1.5708	2.35619	0.359345	-0.40578	-0.145815
1171	0.36788	1.5708	2.35619	0.359639	-0.405493	-0.145831
1172	0.368195	1.5708	2.35619	0.359932	-0.405205	-0.145846
1173	0.368509	1.5708	2.35619	0.360225	-0.404918	-0.145862
1174	0.368823	1.5708	2.35619	0.360518	-0.404631	-0.145877
1175	0.369137	1.5708	2.35619	0.360811	-0.404344	-0.145892
1176	0.369451	1.5708	2.35619	0.361104	-0.404056	-0.145906
1177	0.369765	1.5708	2.35619	0.361397	-0.403769	-0.145921
1178	0.37008	1.5708	2.35619	0.36169	-0.403481	-0.145935
1179	0.370394	1.5708	2.35619	0.361983	-0.403194	-0.145949
1180	0.370708	1.5708	2.35619	0.362275	-0.402906	-0.145963
1181	0.371022	1.5708	2.35619	0.362568	-0.402619	-0.145977
1182	0.371336	1.5708	2.35619	0.362861	-0.402331	-0.14599
1183	0.37165	1.5708	2.35619	0.363154	-0.402044	-0.146004
1184	0.371965	1.5708	2.35619	0.363446	-0.401756	-0.146017
1185	0.372279	1.5708	2.35619	0.363739	-0.401468	-0.14603
1186	0.372593	1.5708	2.35619	0.364032	-0.401181	-0.146042
1187	0.372907	1.5708	2.35619	0.364324	-0.400893	-0.146055
1188	0.373221	1.5708	2.35619	0.364617	-0.400605	-0.146067
1189	0.373535	1.5708	2.35619	0.364909	-0.400317	-0.146079
1190	0.37385	1.5708	2.35619	0.365202	-0.400029	-0.146091
1191	0.374164	1.5708	2.35619	0.365494	-0.399741	-0.146103
1192	0.374478	1.5708	2.35619	0.365787	-0.399453	-0.146115
1193	0.374792	1.5708	2.35619	0.366079	-0.399165	-0.146126
1194	0.375106	1.5708	2.35619	0.366371	-0.398877	-0.146137
1195	0.37542	1.5708	2.35619	0.366664	-0.398589	-0.146148
1196	0.375734	1.5708	2.35619	0.366956	-0.398301	-0.146159
1197	0.376049	1.5708	2.35619	0.367248	-0.398013	-0.146169
1198	0.376363	1.5708	2.35619	0.36754	-0.397724	-0.14618
1199	0.376677	1.5708	2.35619	0.367832	-0.397436	-0.14619
1200	0.376991	1.5708	2.35619	0.368125	-0.397148	-0.1462
1201	0.377305	1.5708	2.35619	0.368417	-0.39686	-0.14621
1202	0.377619	1.5708	2.35619	0.368709	-0.396571	-0.146219
1203	0.377934	1.5708	2.35619	0.369001	-0.396283	-0.146229
1204	0.378248	1.5708	2.35619	0.369293	-0.395994	-0.146238
1205	0.378562	1.5708	2.35619	0.369585	-0.395706	-0.146247
1206	0.378876	1.5708	2.35619	0.369876	-0.395417	-0.146256
1207	0.37919	1.5708	2.35619	0.370168	-0.395129	-0.146264
1208	0.379504	1.5708	2.35619	0.37046	-0.39484	-0.146273
1209	0.379819	1.5708	2.35619	0.370752	-0.394551	-0.146281
1210	0.380133	1.5708	2.35619	0.371044	-0.394263	-0.146289
1211	0.380447	1.5708	2.35619	0.371335	-0.393974	-0.146297
1212	0.380761	1.5708	2.35619	0.371627	-0.393685	-0.146304
1213	0.381075	1.5708	2.35619	0.371919	-0.393396	-0.146312
1214	0.381389	1.5708	2.35619	0.37221	-0.393108	-0.146319
1215	0.381704	1.5708	2.35619	0.372502	-0.392819	-0.146326
1216	0.382018	1.5708	2.35619	0.372793	-0.39253	-0.146333
1217	0.382332	1.5708	2.35619	0.373085	-0.392241	-0.146339
1218	0.382646	1.5708	2.35619	0.373376	-0.391952	-0.146346
1219	0.38296	1.5708	2.35619	0.373668	-0.391663	-0.146352
1220	0.383274	1.5708	2.35619	0.373959	-0.391374	-0.146358
1221	0.383588	1.5708	2.35619	0.374251	-0.391085	-0.146364
1222	0.383903	1.5708	2.35619	0.374542	-0.390795	-0.146369
1223	0.384217	1.5708	2.35619	0.374833	-0.390506	-0.146375
1224	0.384531	1.5708	2.35619	0.375124	-0.390217	-0.14638
1225	0.384845	1.5708	2.35619	0.375416	-0.389928	-0.146385
1226	0.385159	1.5708	2.35619	0.375707	-0.389638	-0.14639
1227	0.385473	1.5708	2.35619	0.375998	-0.389349	-0.146394
1228	0.385788	1.5708	2.35619	0.376289	-0.38906	-0.146399
1229	0.386102	1.5708	2.35619	0.37658	-0.38877	-0.146403
1230	0.386416	1.5708	2.35619	0.376871	-0.388481	-0.146407
1231	0.38673	1.5708	2.35619	0.377162	-0.388191	-0.146411
1232	0.387044	1.5708	2.35619	0.377453	-0.387902	-0.146415
1233	0.387358	1.5708	2.35619	0.377744	-0.387612	-0.146418
1234	0.387673	1.5708	2.35619	0.378035	-0.387323	-0.146421
1235	0.387987	1.5708	2.35619	0.378326	-0.387033	-0.146424
1236	0.388301	1.5708	2.35619	0.378616	-0.386743	-0.146427
1237	0.388615	1.5708	2.35619	0.378907	-0.386453	-0.14643
1238	0.388929	1.5708	2.35619	0.379198	-0.386164	-0.146432
1239	0.389243	1.5708	2.35619	0.379488	-0.385874	-0.146435
1240	0.389557	1.5708	2.35619	0.379779	-0.385584	-0.146437
1241	0.389872	1.5708	2.35619	0.38007	-0.385294	-0.146439
1242	0.390186	1.5708	2.35619	0.38036	-0.385004	-0.14644
1243	0.3905	1.5708	2.35619	0.380651	-0.384714	-0.146442
1244	0.390814	1.5708	2.35619	0.380941	-0.384424	-0.146443
1245	0.391128	1.5708	2.35619	0.381232	-0.384134	-0.146444
1246	0.391442	1.5708	2.35619	0.381522	-0.383844	-0.146445
1247	0.391757	1.5708	2.35619	0.381813	-0.383554	-0.146446
1248	0.392071	1.5708	2.35619	0.382103	-0.383264	-0.146446
1249	0.392385	1.5708	2.35619	0.382393	-0.382974	-0.146447
1250	0.392699	1.5708	2.35619	0.382683	-0.382683	-0.146447
1251	0.393013	1.5708	2.35619	0.382974	-0.382393	-0.146447
1252	0.393327	1.5708	2.35619	0.383264	-0.382103	-0.146446
1253	0.393642	1.5708	2.35619	0.383554	-0.381813	-0.146446
1254	0.393956	1.5708	2.35619	0.383844	-0.381522	-0.146445
1255	0.39427	1.5708	2.35619	0.384134	-0.381232	-0.146444
1256	0.394584	1.5708	2.35619	0.384424	-0.380941	-0.146443
1257	0.394898	1.5708	2.35619	0.384714	-0.380651	-0.146442
1258	0.395212	1.5708	2.35619	0.385004	-0.38036	-0.14644
1259	0.395527	1.5708	2.35619	0.385294	-0.38007	-0.146439
1260	0.395841	1.5708	2.35619	0.385584	-0.379779	-0.146437
1261	0.396155	1.5708	2.35619	0.385874	-0.379488	-0.146435
1262	0.396469	1.5708	2.35619	0.386164	-0.379198	-0.146432
1263	0.396783	1.5708	2.35619	0.386453	-0.378907	-0.14643
1264	0.397097	1.5708	2.35619	0.386743	-0.378616	-0.146427
1265	0.397411	1.5708	2.35619	0.387033	-0.378326	-0.146424
1266	0.397726	1.5708	2.35619	0.387323	-0.378035	-0.146421
1267	0.39804	1.5708	2.35619	0.387612	-0.377744	-0.146418
1268	0.398354	1.5708	2.35619	0.387902	-0.377453	-0.146415
1269	0.398668	1.5708	2.35619	0.388191	-0.377162	-0.146411
1270	0.398982	1.5708	2.35619	0.388481	-0.376871	-0.146407
1271	0.399296	1.5708	2.35619	0.38877	-0.37658	-0.146403
1272	0.399611	1.5708	2.35619	0.38906	-0.376289	-0.146399
1273	0.399925	1.5708	2.35619	0.389349	-0.375998	-0.146394
1274	0.400239	1.5708	2.35619	0.389638	-0.375707	-0.14639
1275	0.400553	1.5708	2.35619	0.389928	-0.375416	-0.146385
1276	0.400867	1.5708	2.35619	0.390217	-0.375124	-0.14638
1277	0.401181	1.5708	2.35619	0.390506	-0.374833	-0.146375
1278	0.401496	1.5708	2.35619	0.390795	-0.374542	-0.146369
1279	0.40181	1.5708	2.35619	0.391085	-0.374251	-0.146364
1280	0.402124	1.5708	2.35619	0.391374	-0.373959	-0.146358
1281	0.402438	1.5708	2.35619	0.391663	-0.373668	-0.146352
1282	0.402752	1.5708	2.35619	0.391952	-0.373376	-0.146346
1283	0.403066	1.5708	2.35619	0.392241	-0.373085	-0.146339
1284	0.40338	1.5708	2.35619	0.39253	-0.372793	-0.146333
1285	0.403695	1.5708	2.35619	0.392819	-0.372502	-0.146326
1286	0.404009	1.5708	2.35619	0.393108	-0.37221	-0.146319
1287	0.404323	1.5708	2.35619	0.393396	-0.371919	-0.146312
1288	0.404637	1.5708	2.35619	0.393685	-0.371627	-0.146304
1289	0.404951	1.5708	2.35619	0.393974	-0.371335	-0.146297
1290	0.405265	1.5708	2.35619	0.394263	-0.371044	-0.146289
1291	0.40558	1.5708	2.35619	0.394551	-0.370752	-0.146281
1292	0.405894	1.5708	2.35619	0.39484	-0.37046	-0.146273
1293	0.406208	1.5708	2.35619	0.395129	-0.370168	-0.146264
1294	0.406522	1.5708	2.35619	0.395417	-0.369876	-0.146256
1295	0.406836	1.5708	2.35619	0.395706	-0.369585	-0.146247
1296	0.40715	1.5708	2.35619	0.395994	-0.369293	-0.146238
1297	0.407465	1.5708	2.35619	0.396283	-0.369001	-0.146229
1298	0.407779	1.5708	2.35619	0.396571	-0.368709	-0.146219
1299	0.408093	1.5708	2.35619	0.39686	-0.368417	-0.14621
1300	0.408407	1.5708	2.35619	0.397148	-0.368125	-0.1462
1301	0.408721	1.5708	2.35619	0.397436	-0.367832	-0.14619
1302	0.409035	1.5708	2.35619	0.397724	-0.36754	-0.14618
1303	0.40935	1.5708	2.35619	0.398013	-0.367248	-0.146169
1304	0.409664	1.5708	2.35619	0.398301	-0.366956	-0.146159
1305	0.409978	1.5708	2.35619	0.398589	-0.366664	-0.146148
1306	0.410292	1.5708	2.35619	0.398877	-0.366371	-0.146137
1307	0.410606	1.5708	2.35619	0.399165	-0.366079	-0.146126
1308	0.41092	1.5708	2.35619	0.399453	-0.365787	-0.146115
1309	0.411234	1.5708	2.35619	0.399741	-0.365494	-0.146103
1310	0.411549	1.5708	2.35619	0.400029	-0.365202	-0.146091
1311	0.411863	1.5708	2.35619	0.400317	-0.364909	-0.146079
1312	0.412177	1.5708	2.35619	0.400605	-0.364617	-0.146067
1313	0.412491	1.5708	2.35619	0.400893	-0.364324	-0.146055
1314	0.412805	1.5708	2.35619	0.401181	-0.364032	-0.146042
1315	0.413119	1.5708	2.35619	0.401468	-0.363739	-0.14603
[truncated: 8,687 more rows]

## Sheet: Result
Table I: Numerical Correlation Components for Optimal Violation
[truncated: 6 more rows]
